# Supplementary figures and images for: A High-Throughput Skim-sequencing Approach for Genotyping, Dosage Estimation and Identifying Translocations
Source: Research Square preprint supplement (doi:10.21203/rs.3.rs-923020/v1), 2021-10-14

StanleyLandmarkDH01002-0

CDC Landmark CDC Stanley

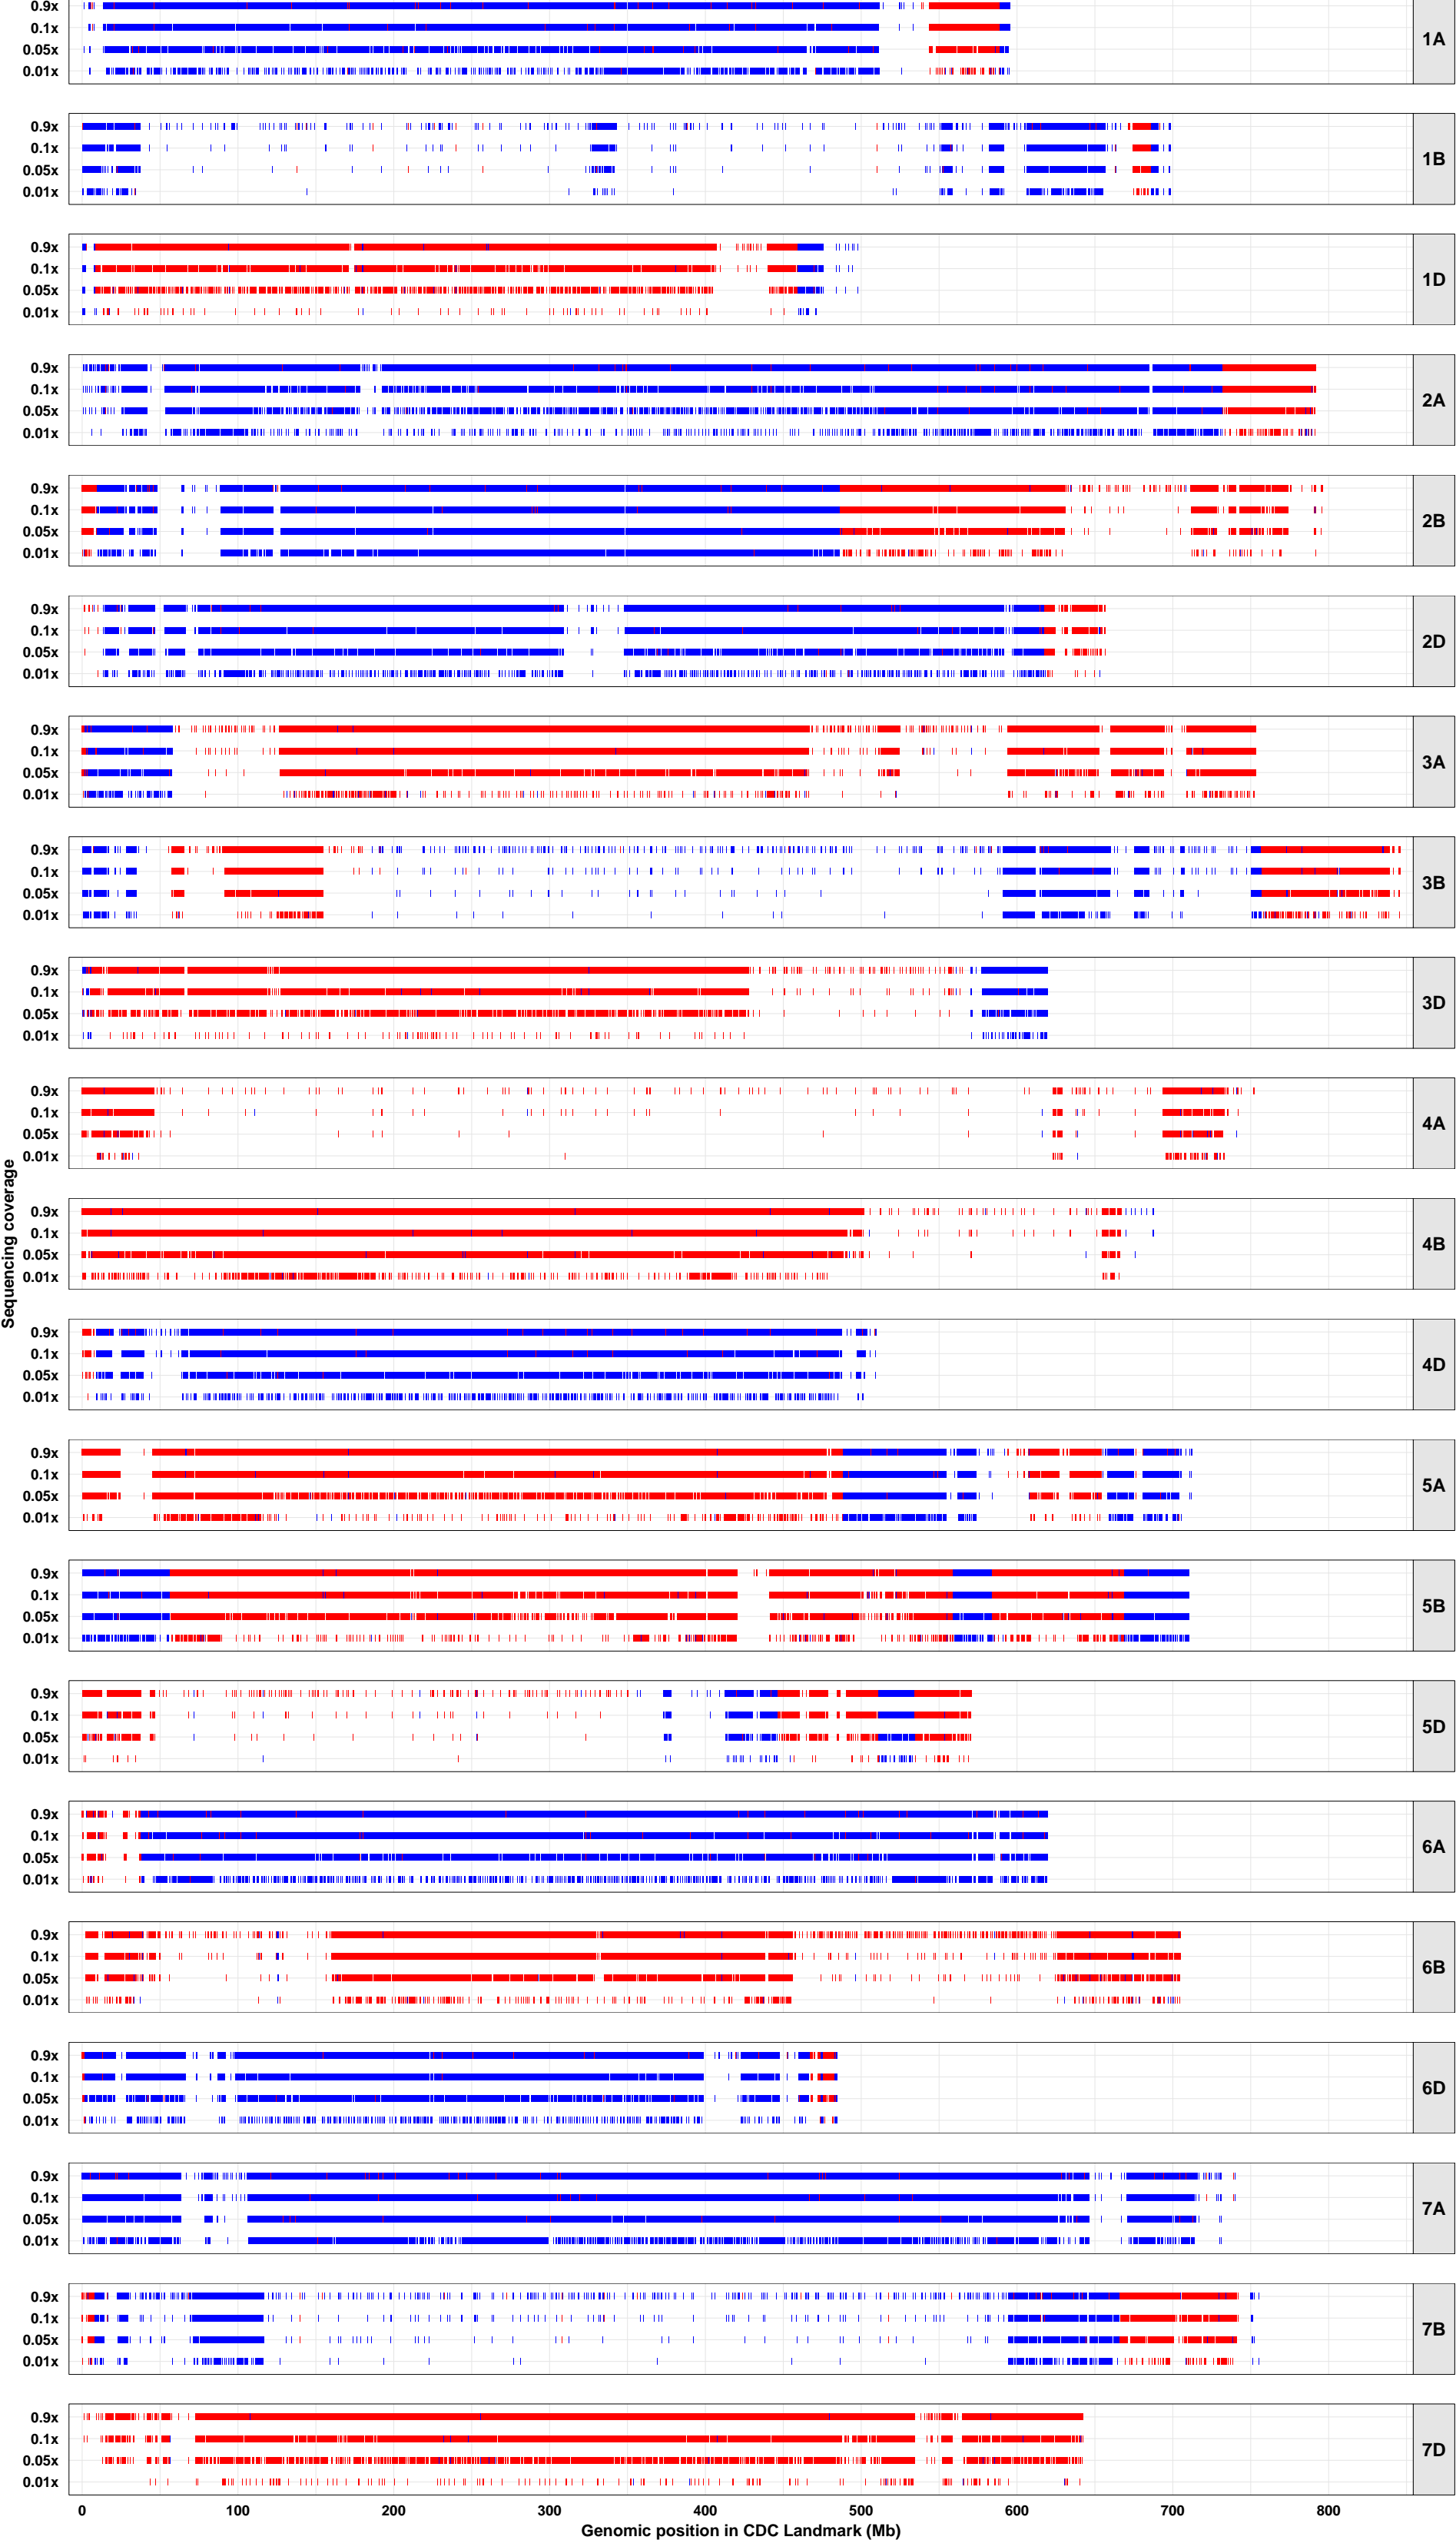

Supplement: Supplementary file 1 [file StanleyLandmarkDH01002-0.pdf › Supplementary-Figure-S3_StanleyLandmarkDH/StanleyLandmarkDH01002-0.pdf]

**CDC Landmark** **CDC Stanley**

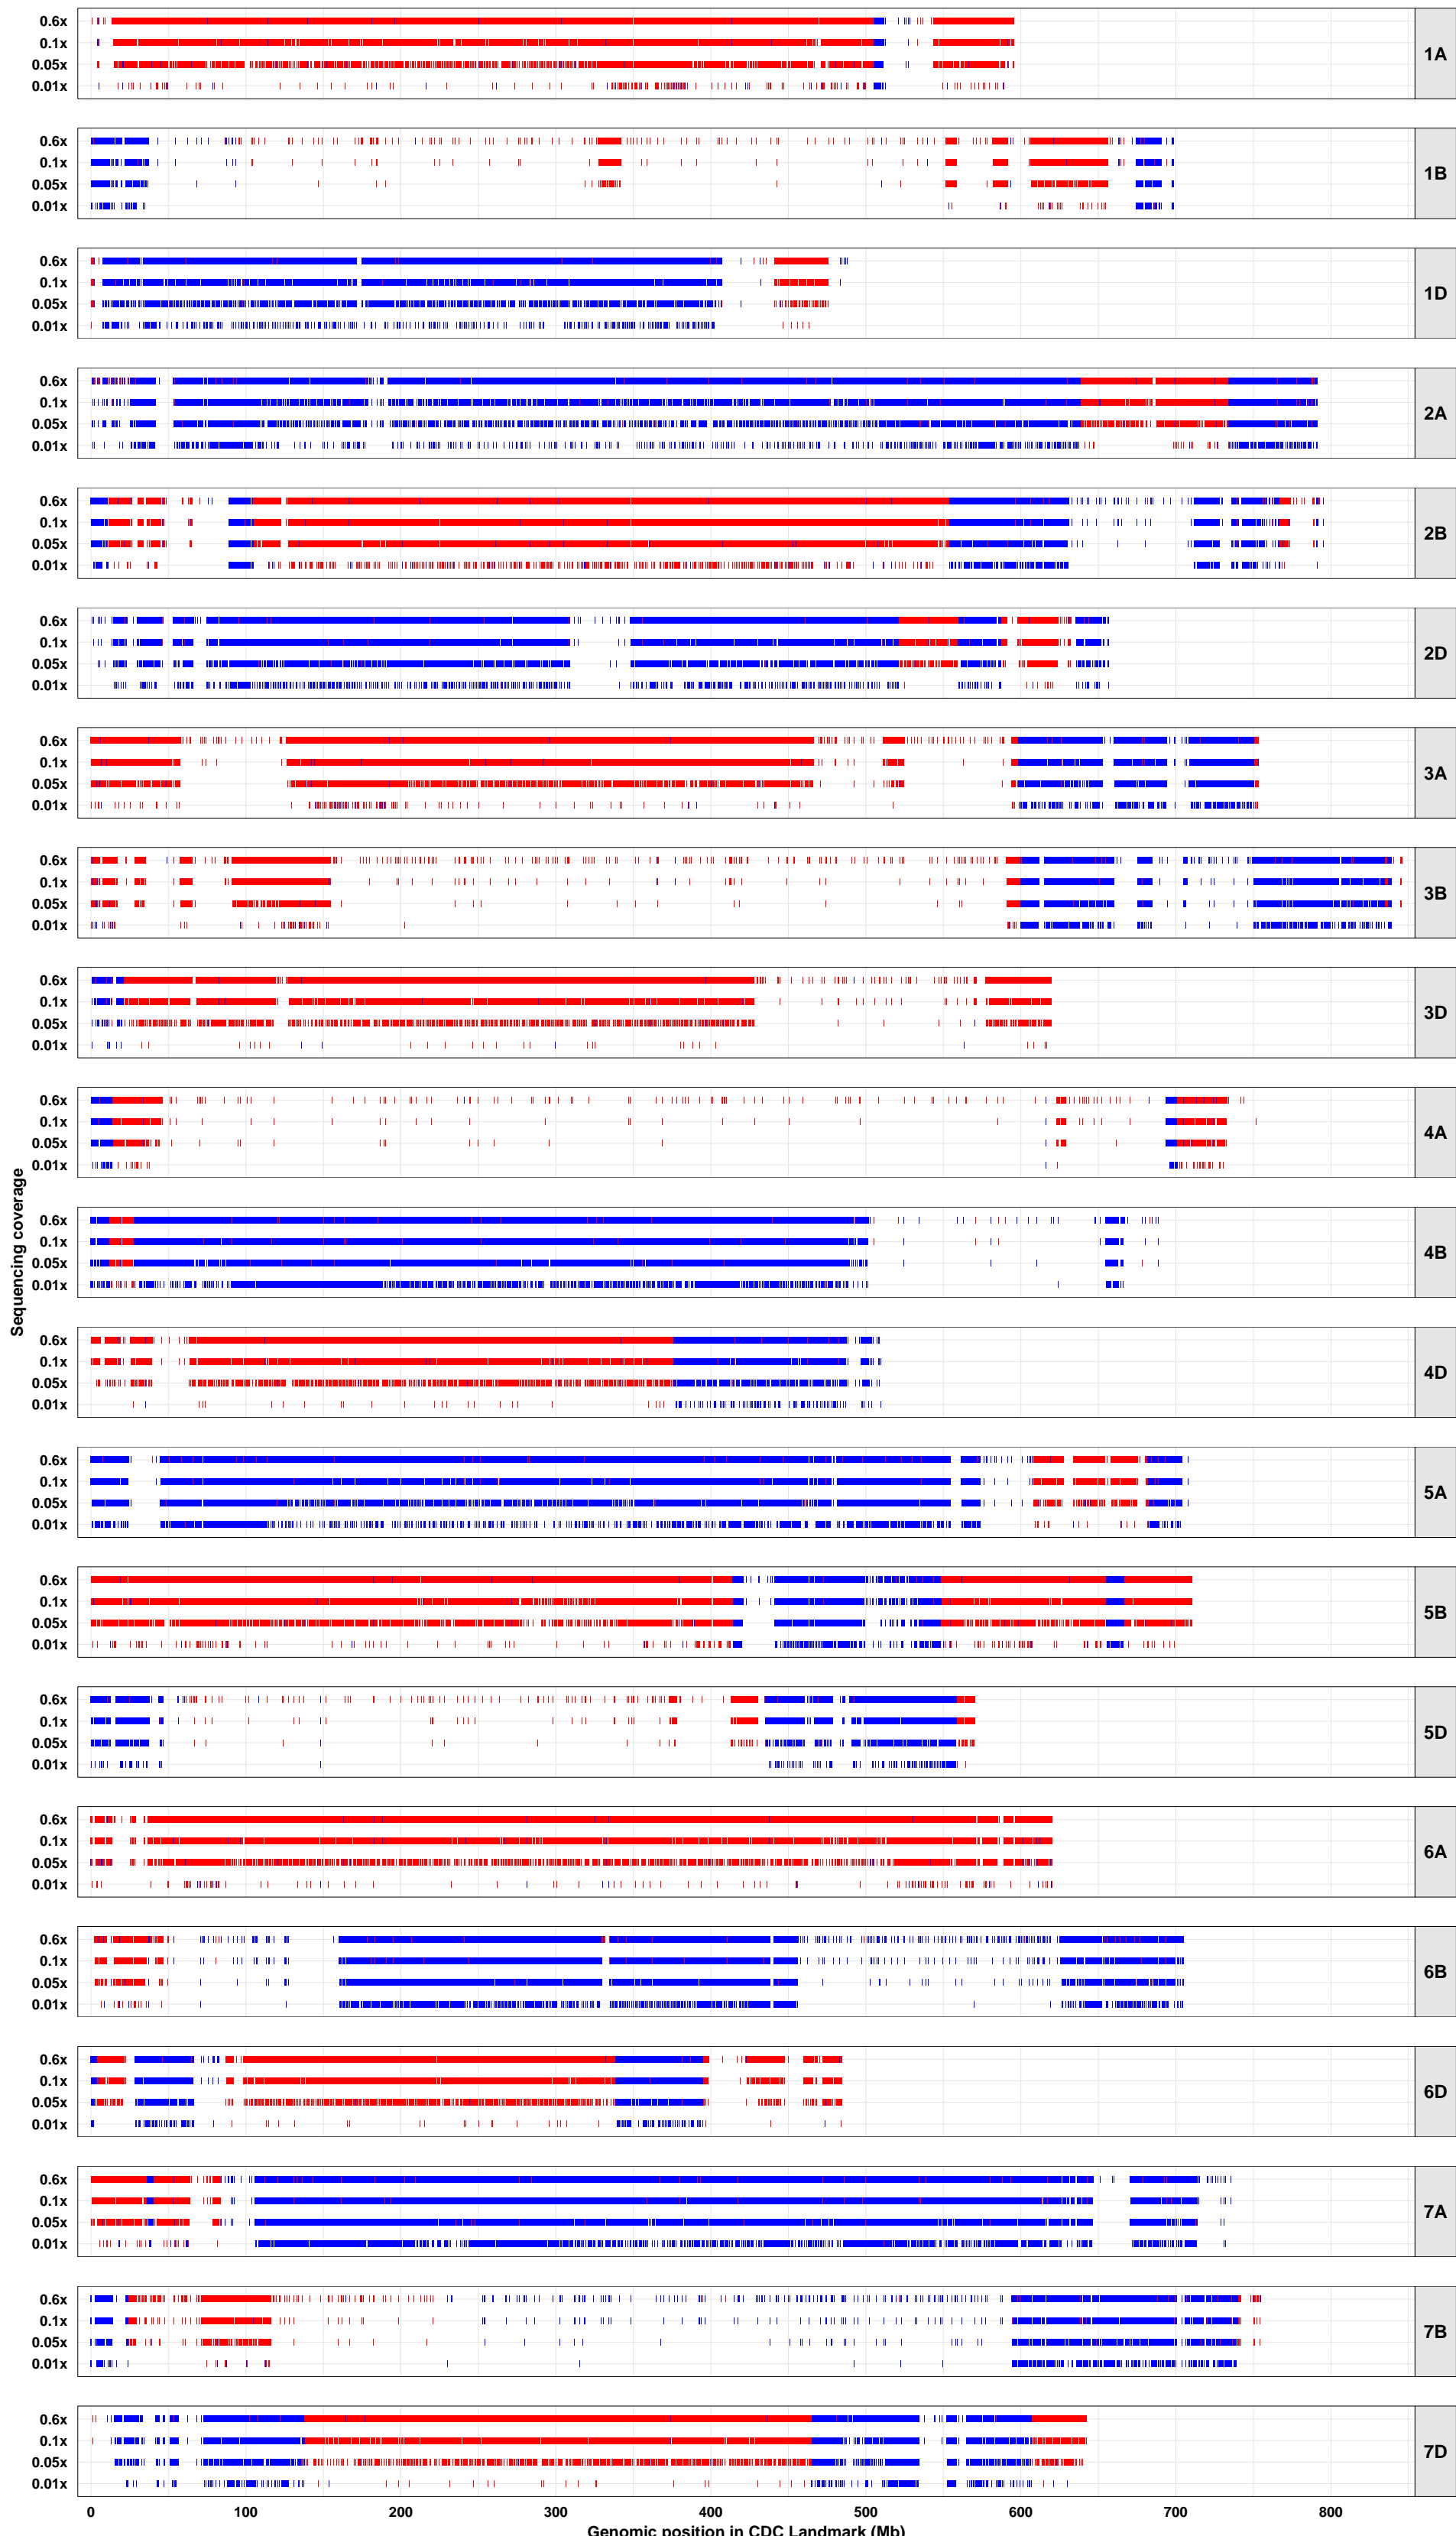

Supplement: Supplementary file 2 [file StanleyLandmarkDH01003-0.pdf › Supplementary-Figure-S3_StanleyLandmarkDH/StanleyLandmarkDH01003-0.pdf]

StanleyLandmarkKDHO1011-0

CDC Landmark CDC Stanley

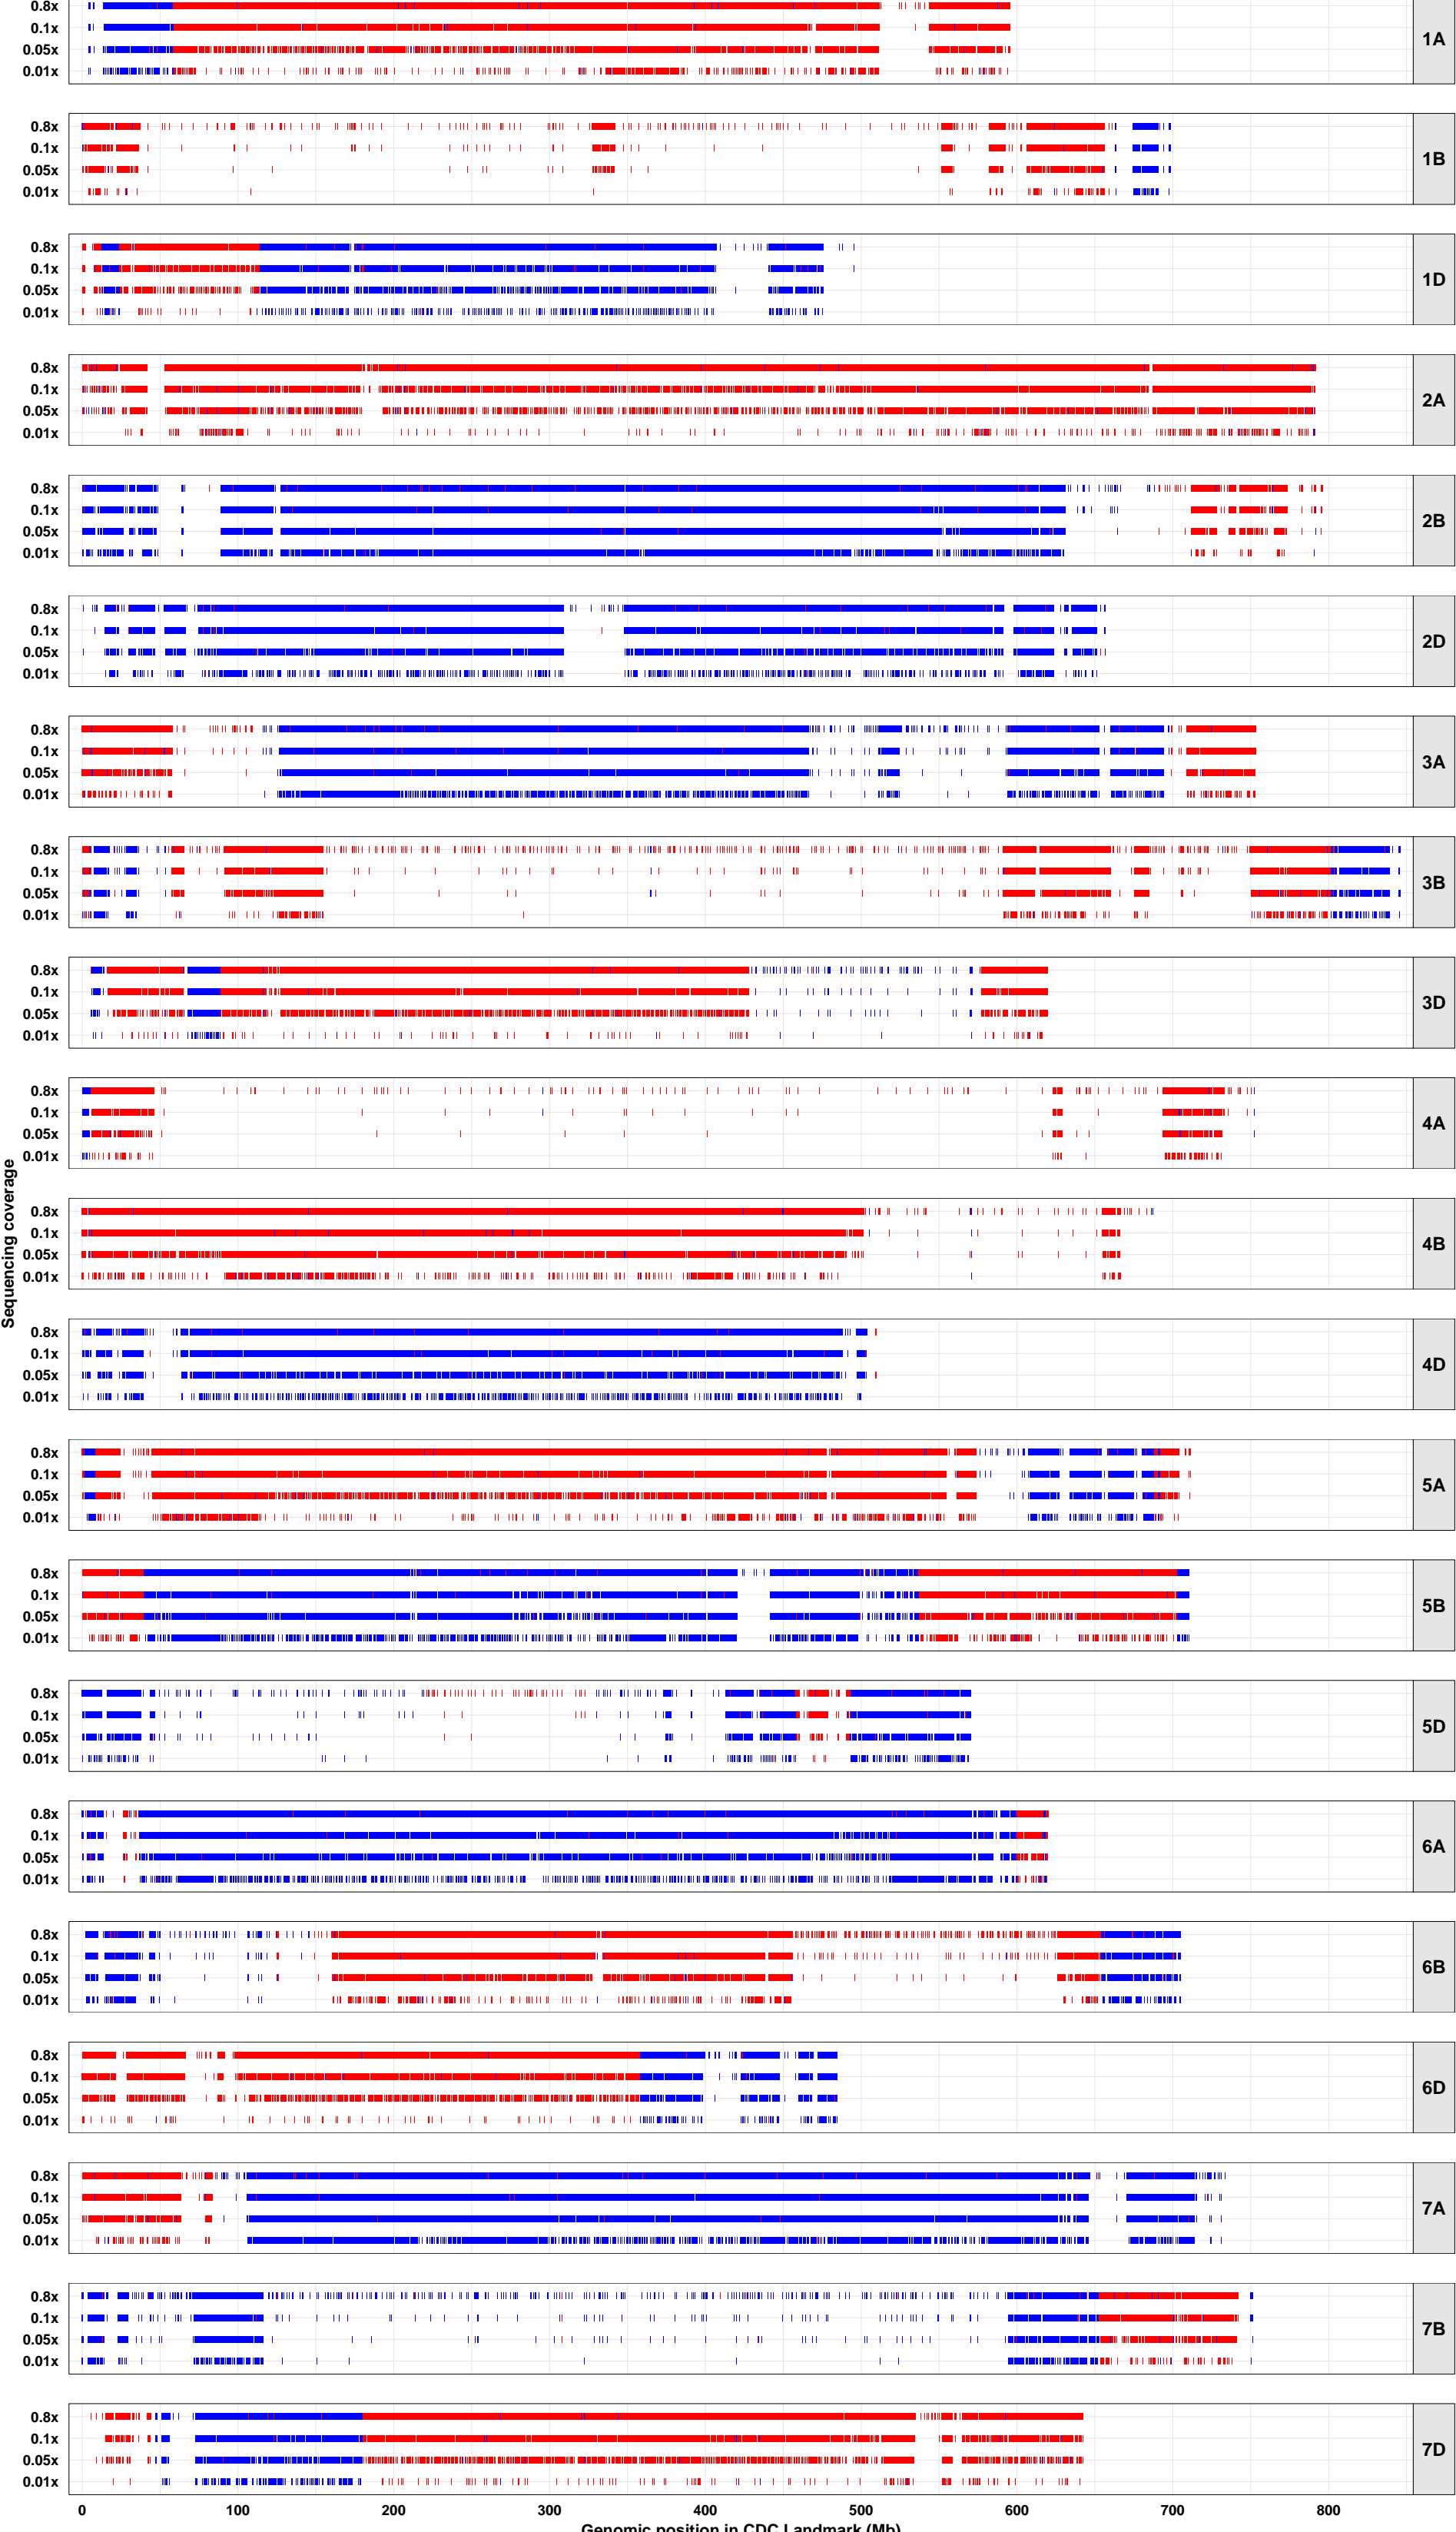

Supplement: Supplementary file 3 [file StanleyLandmarkDH01011-0.pdf › Supplementary-Figure-S3_StanleyLandmarkDH/StanleyLandmarkDH01011-0.pdf]

StanleyLandmarkDH01018-0

CDC Landmark CDC Stanley

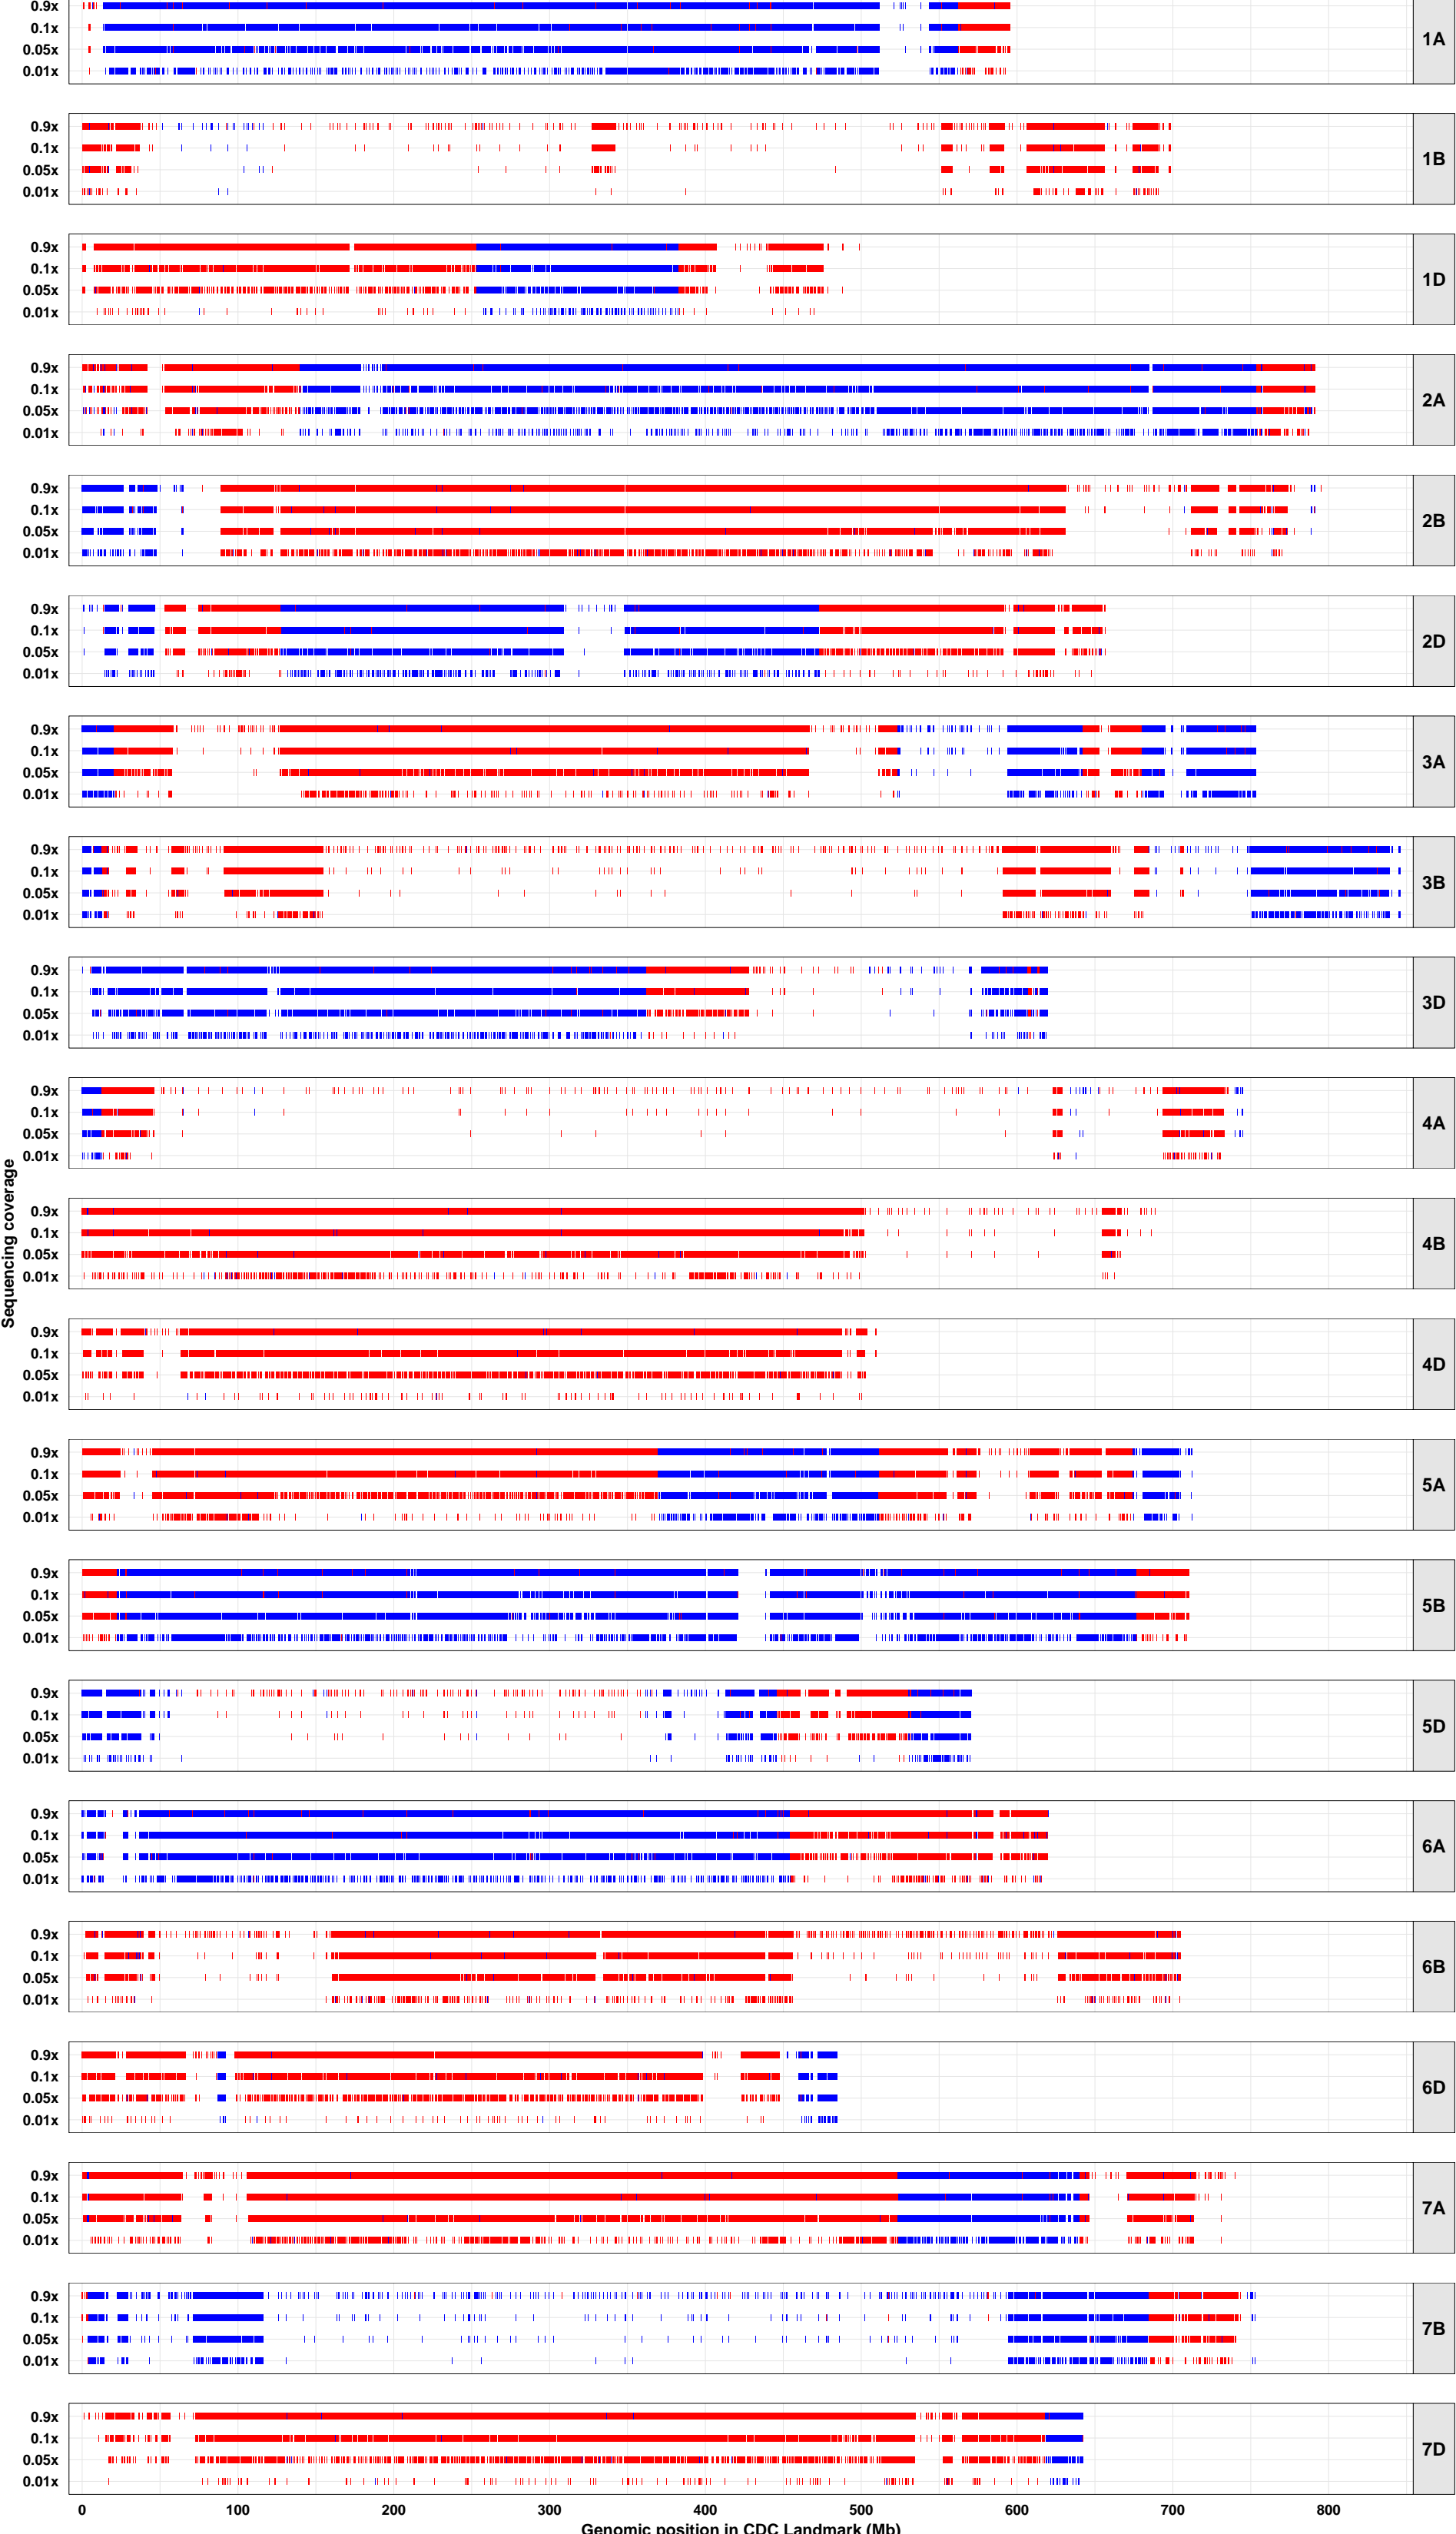

Supplement: Supplementary file 4 [file StanleyLandmarkDH01018-0.pdf › Supplementary-Figure-S3_StanleyLandmarkDH/StanleyLandmarkDH01018-0.pdf]

StanleyLandmarkKDHO1021-0

CDC Landmark CDC Stanley

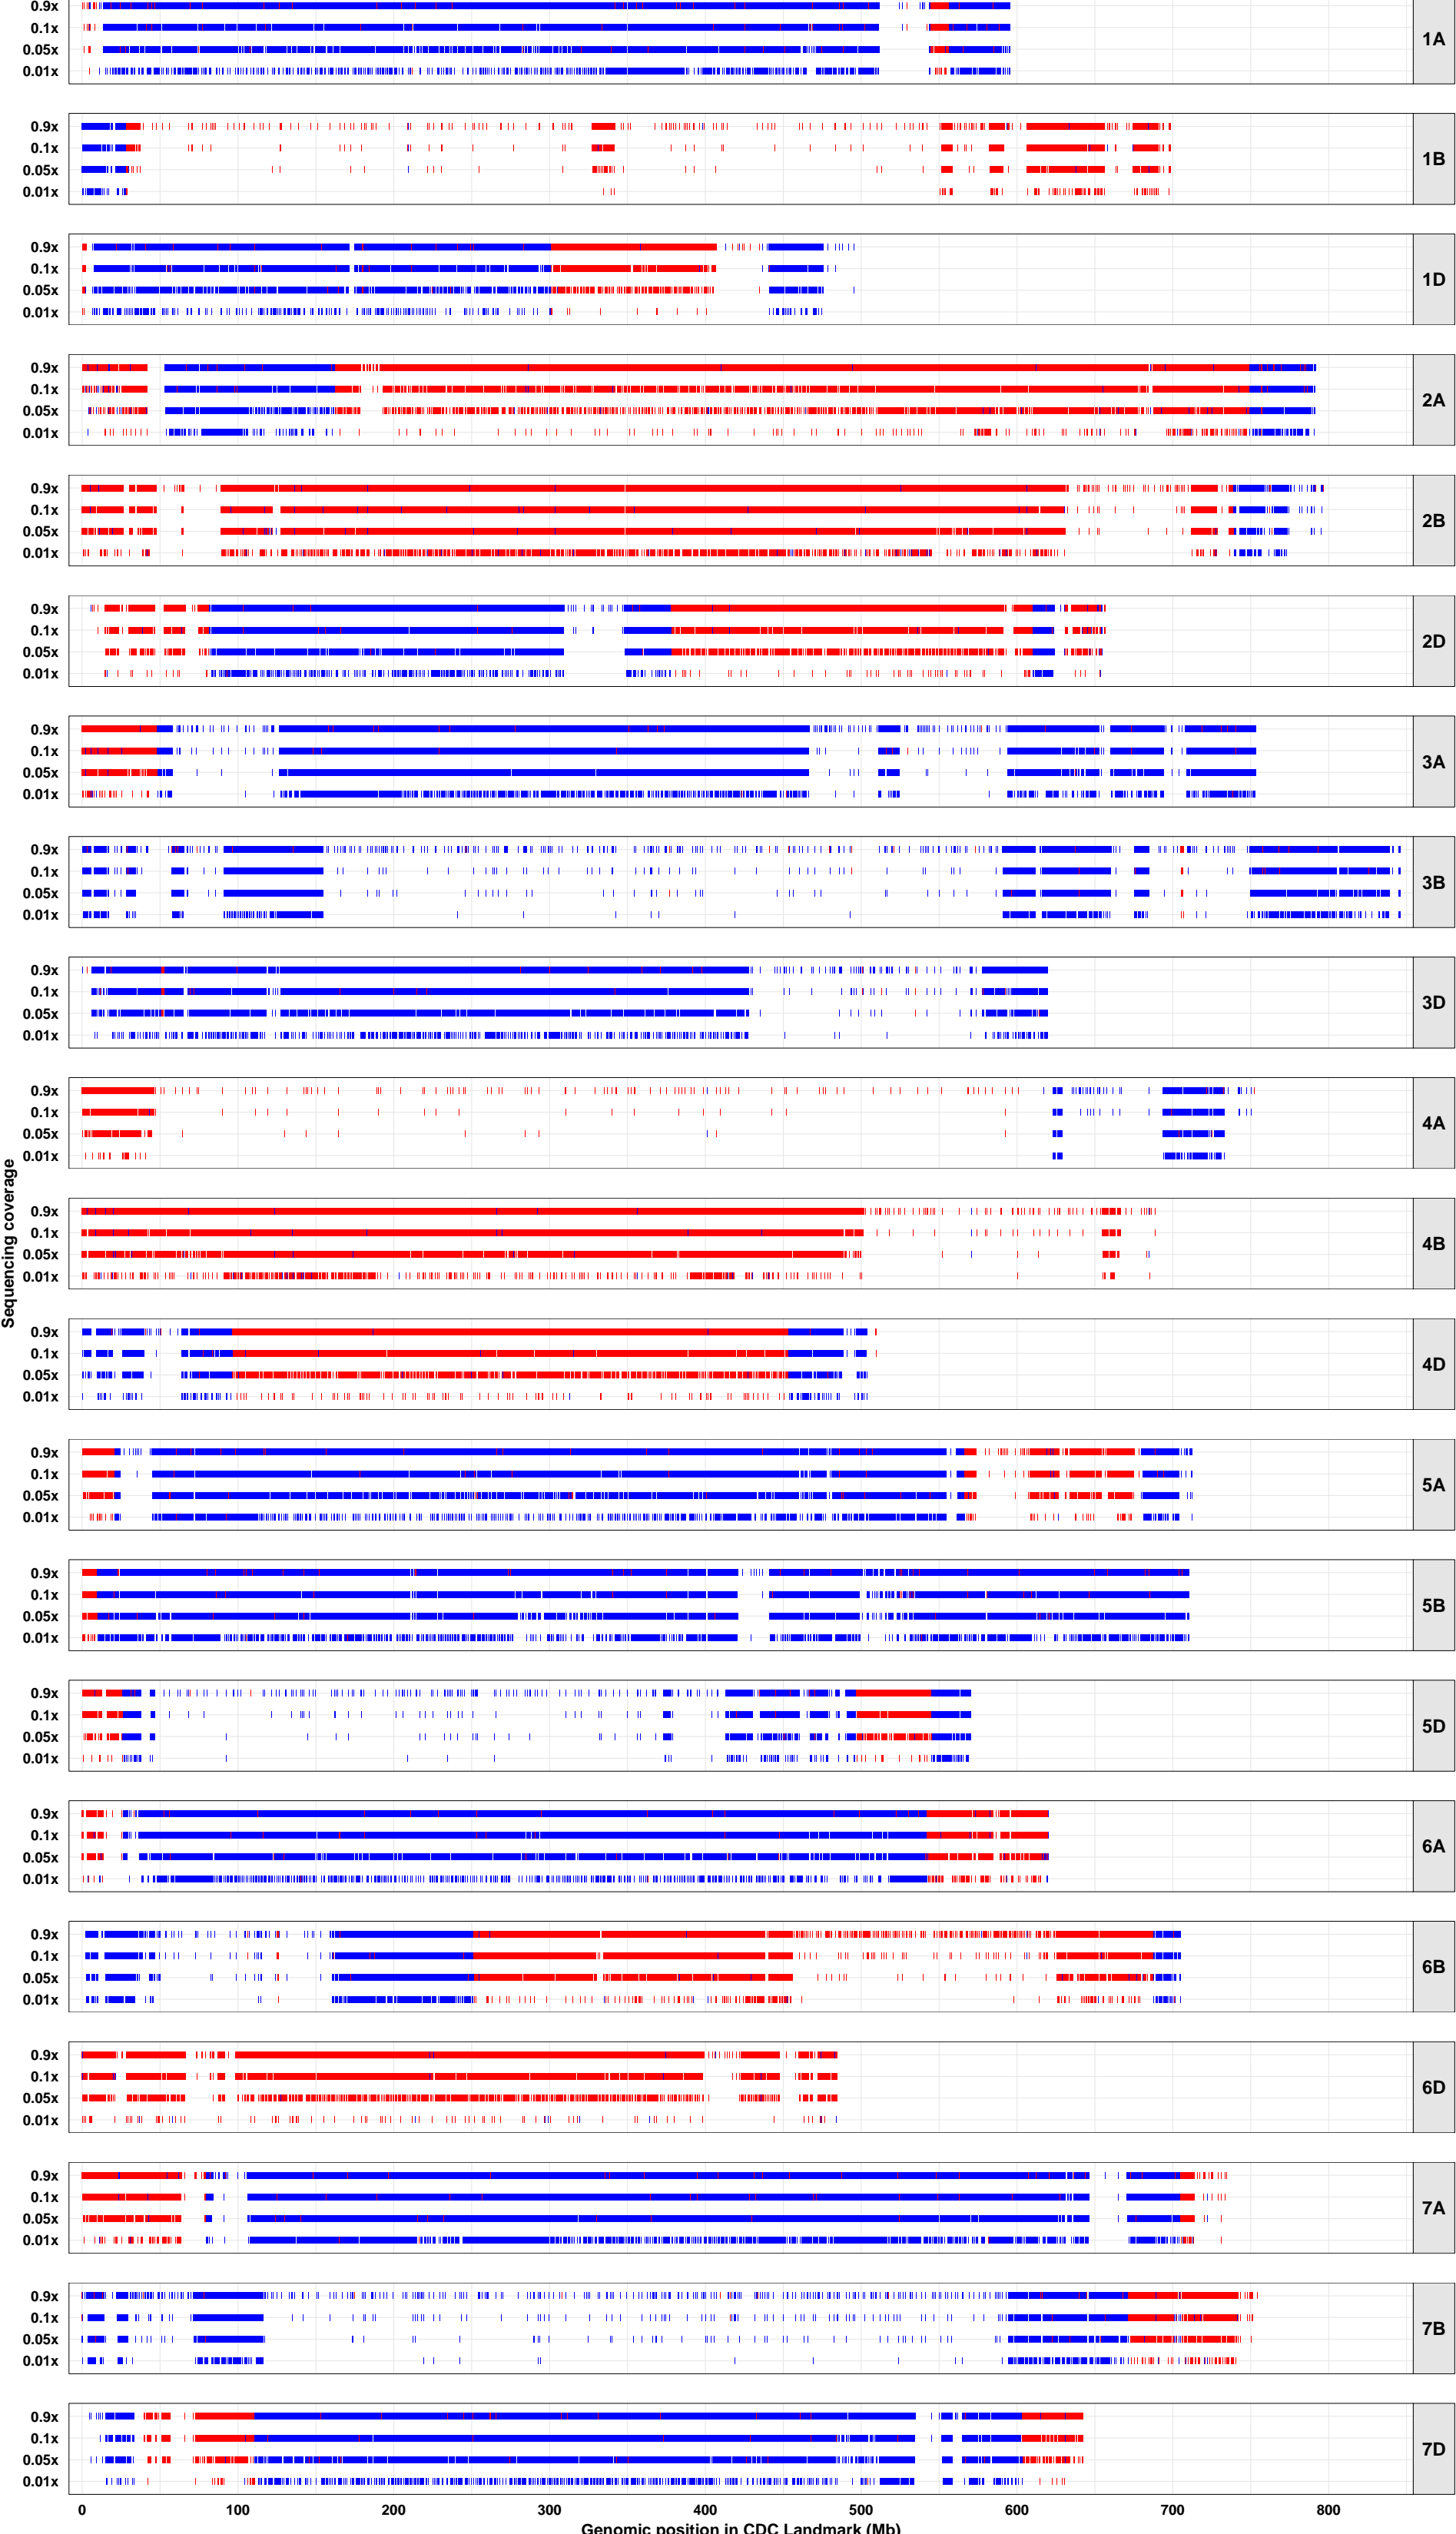

Supplement: Supplementary file 5 [file StanleyLandmarkDH01021-0.pdf › Supplementary-Figure-S3_StanleyLandmarkDH/StanleyLandmarkDH01021-0.pdf]

StanleyLandmarkKDHO1027-0

CDC Landmark CDC Stanley

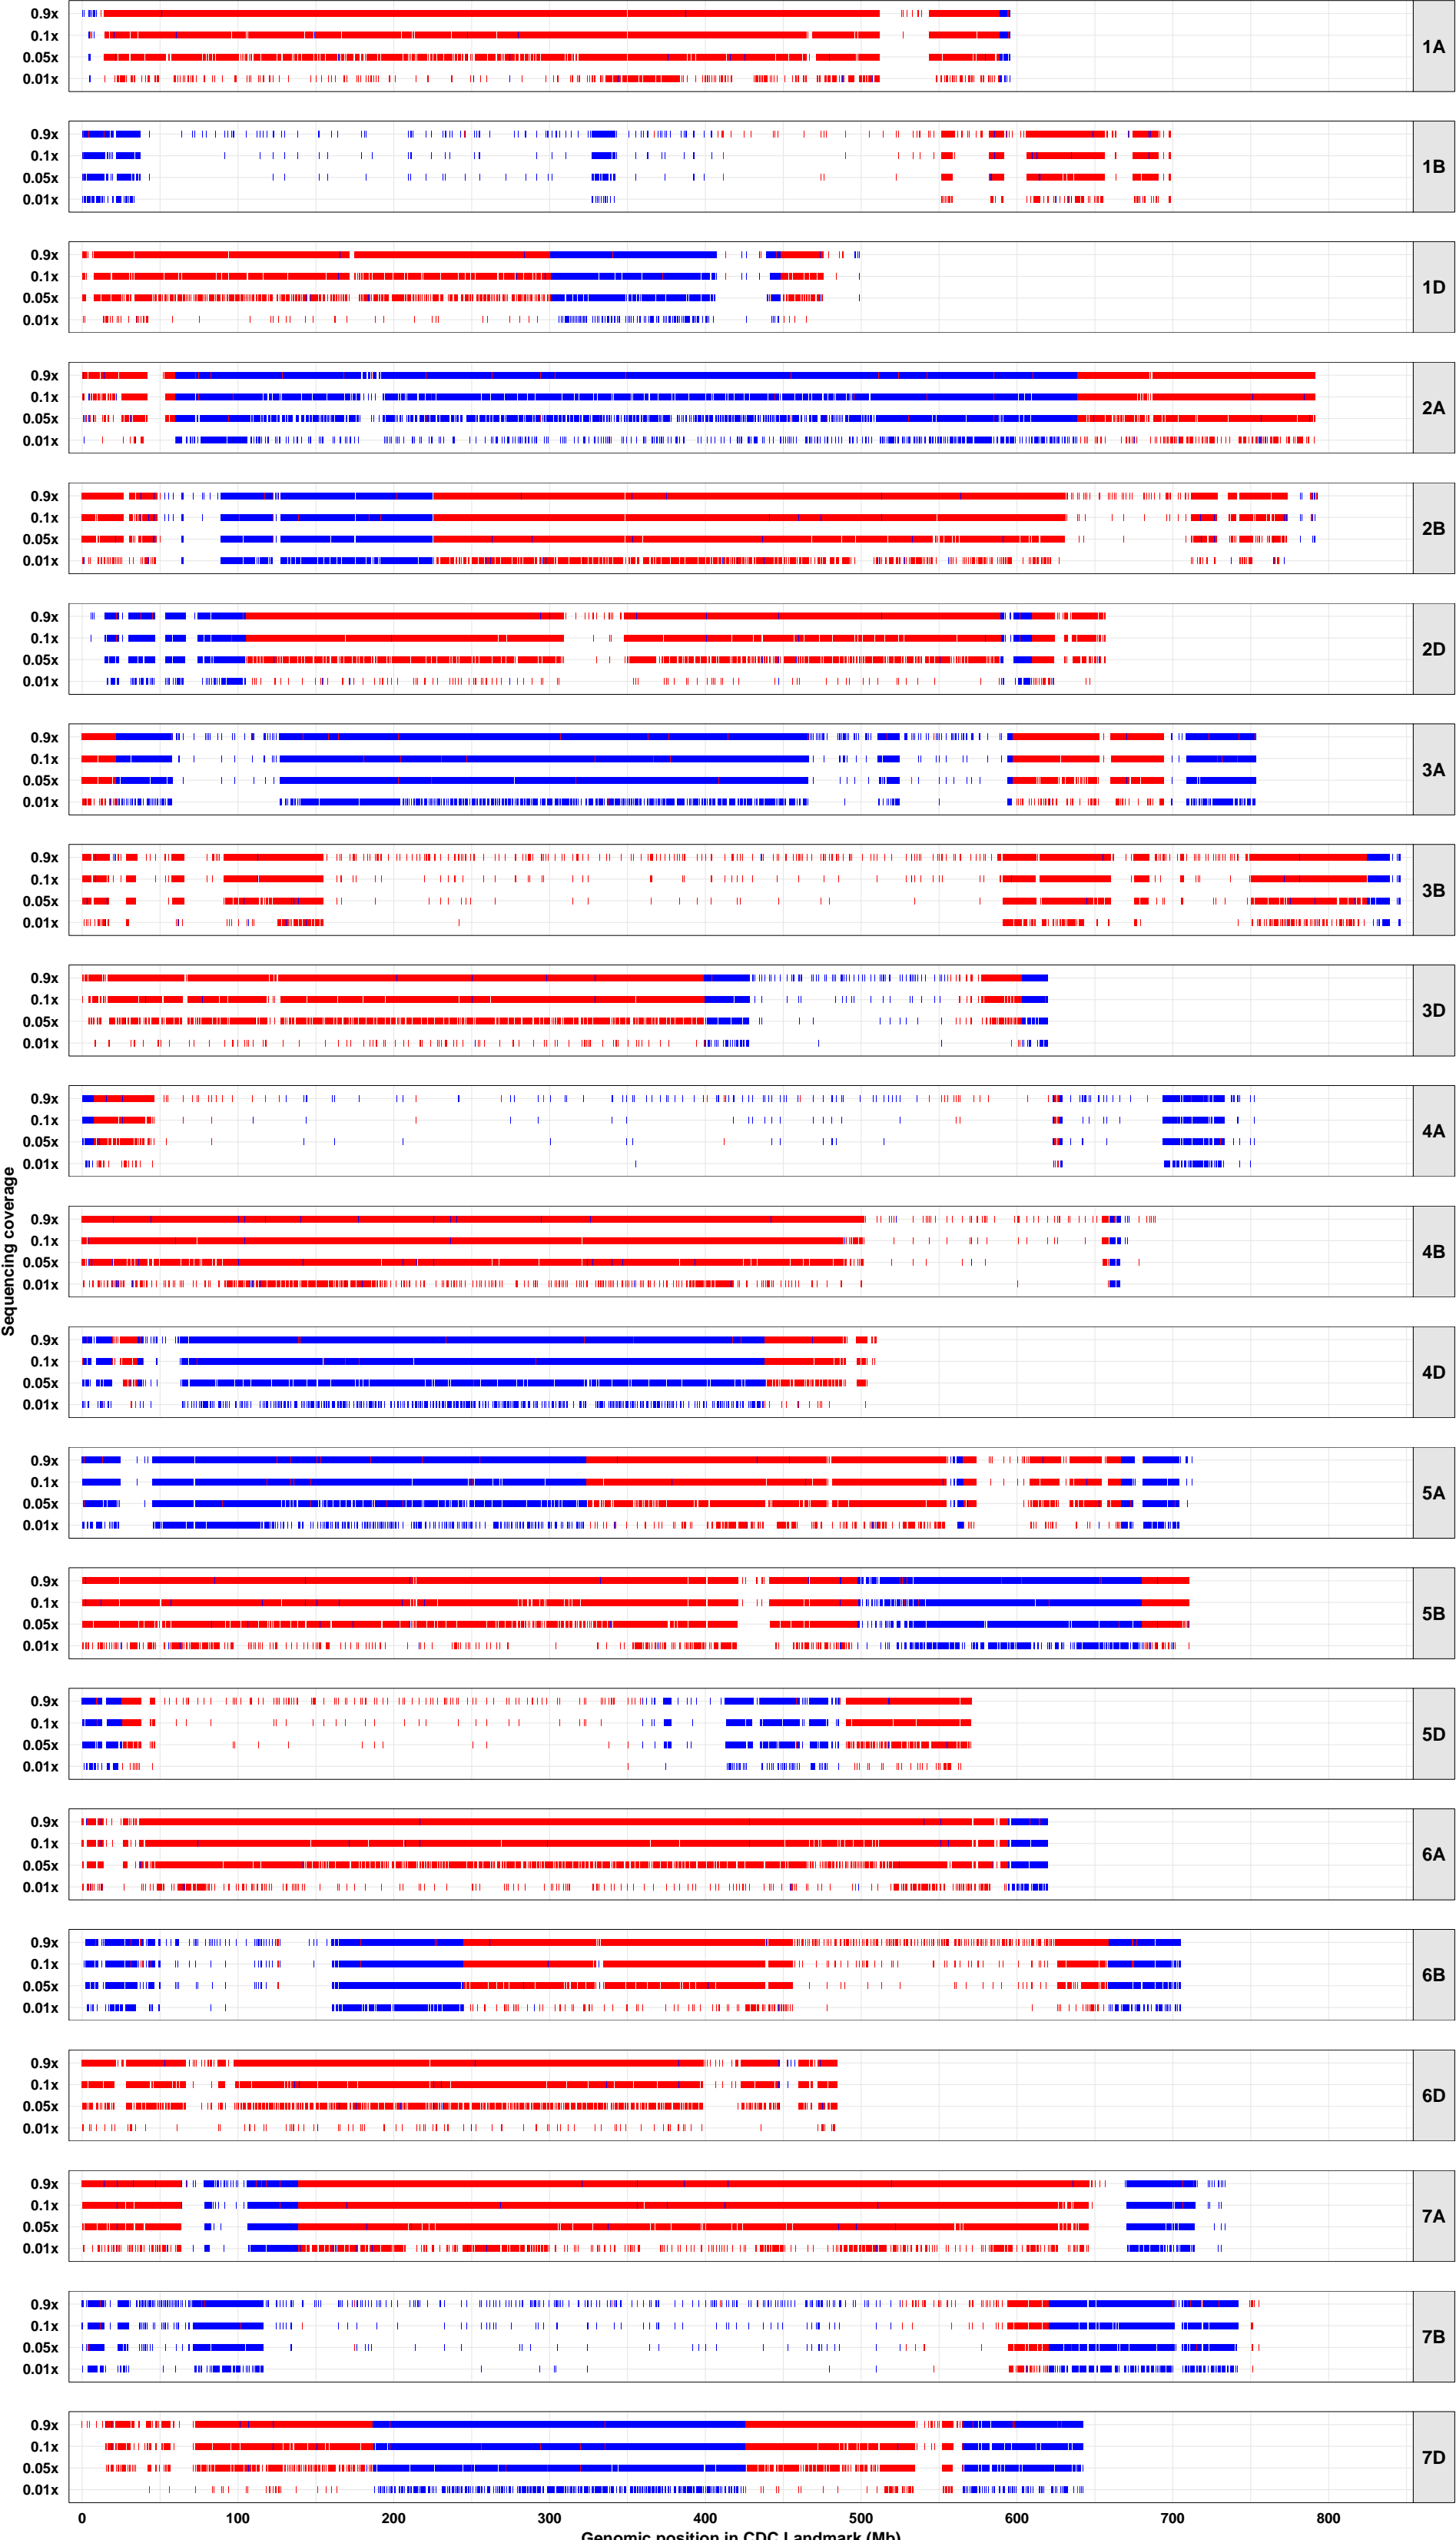

Supplement: Supplementary file 6 [file StanleyLandmarkDH01027-0.pdf › Supplementary-Figure-S3_StanleyLandmarkDH/StanleyLandmarkDH01027-0.pdf]

StanleyLandmarkKDHO1029-0

CDC Landmark CDC Stanley

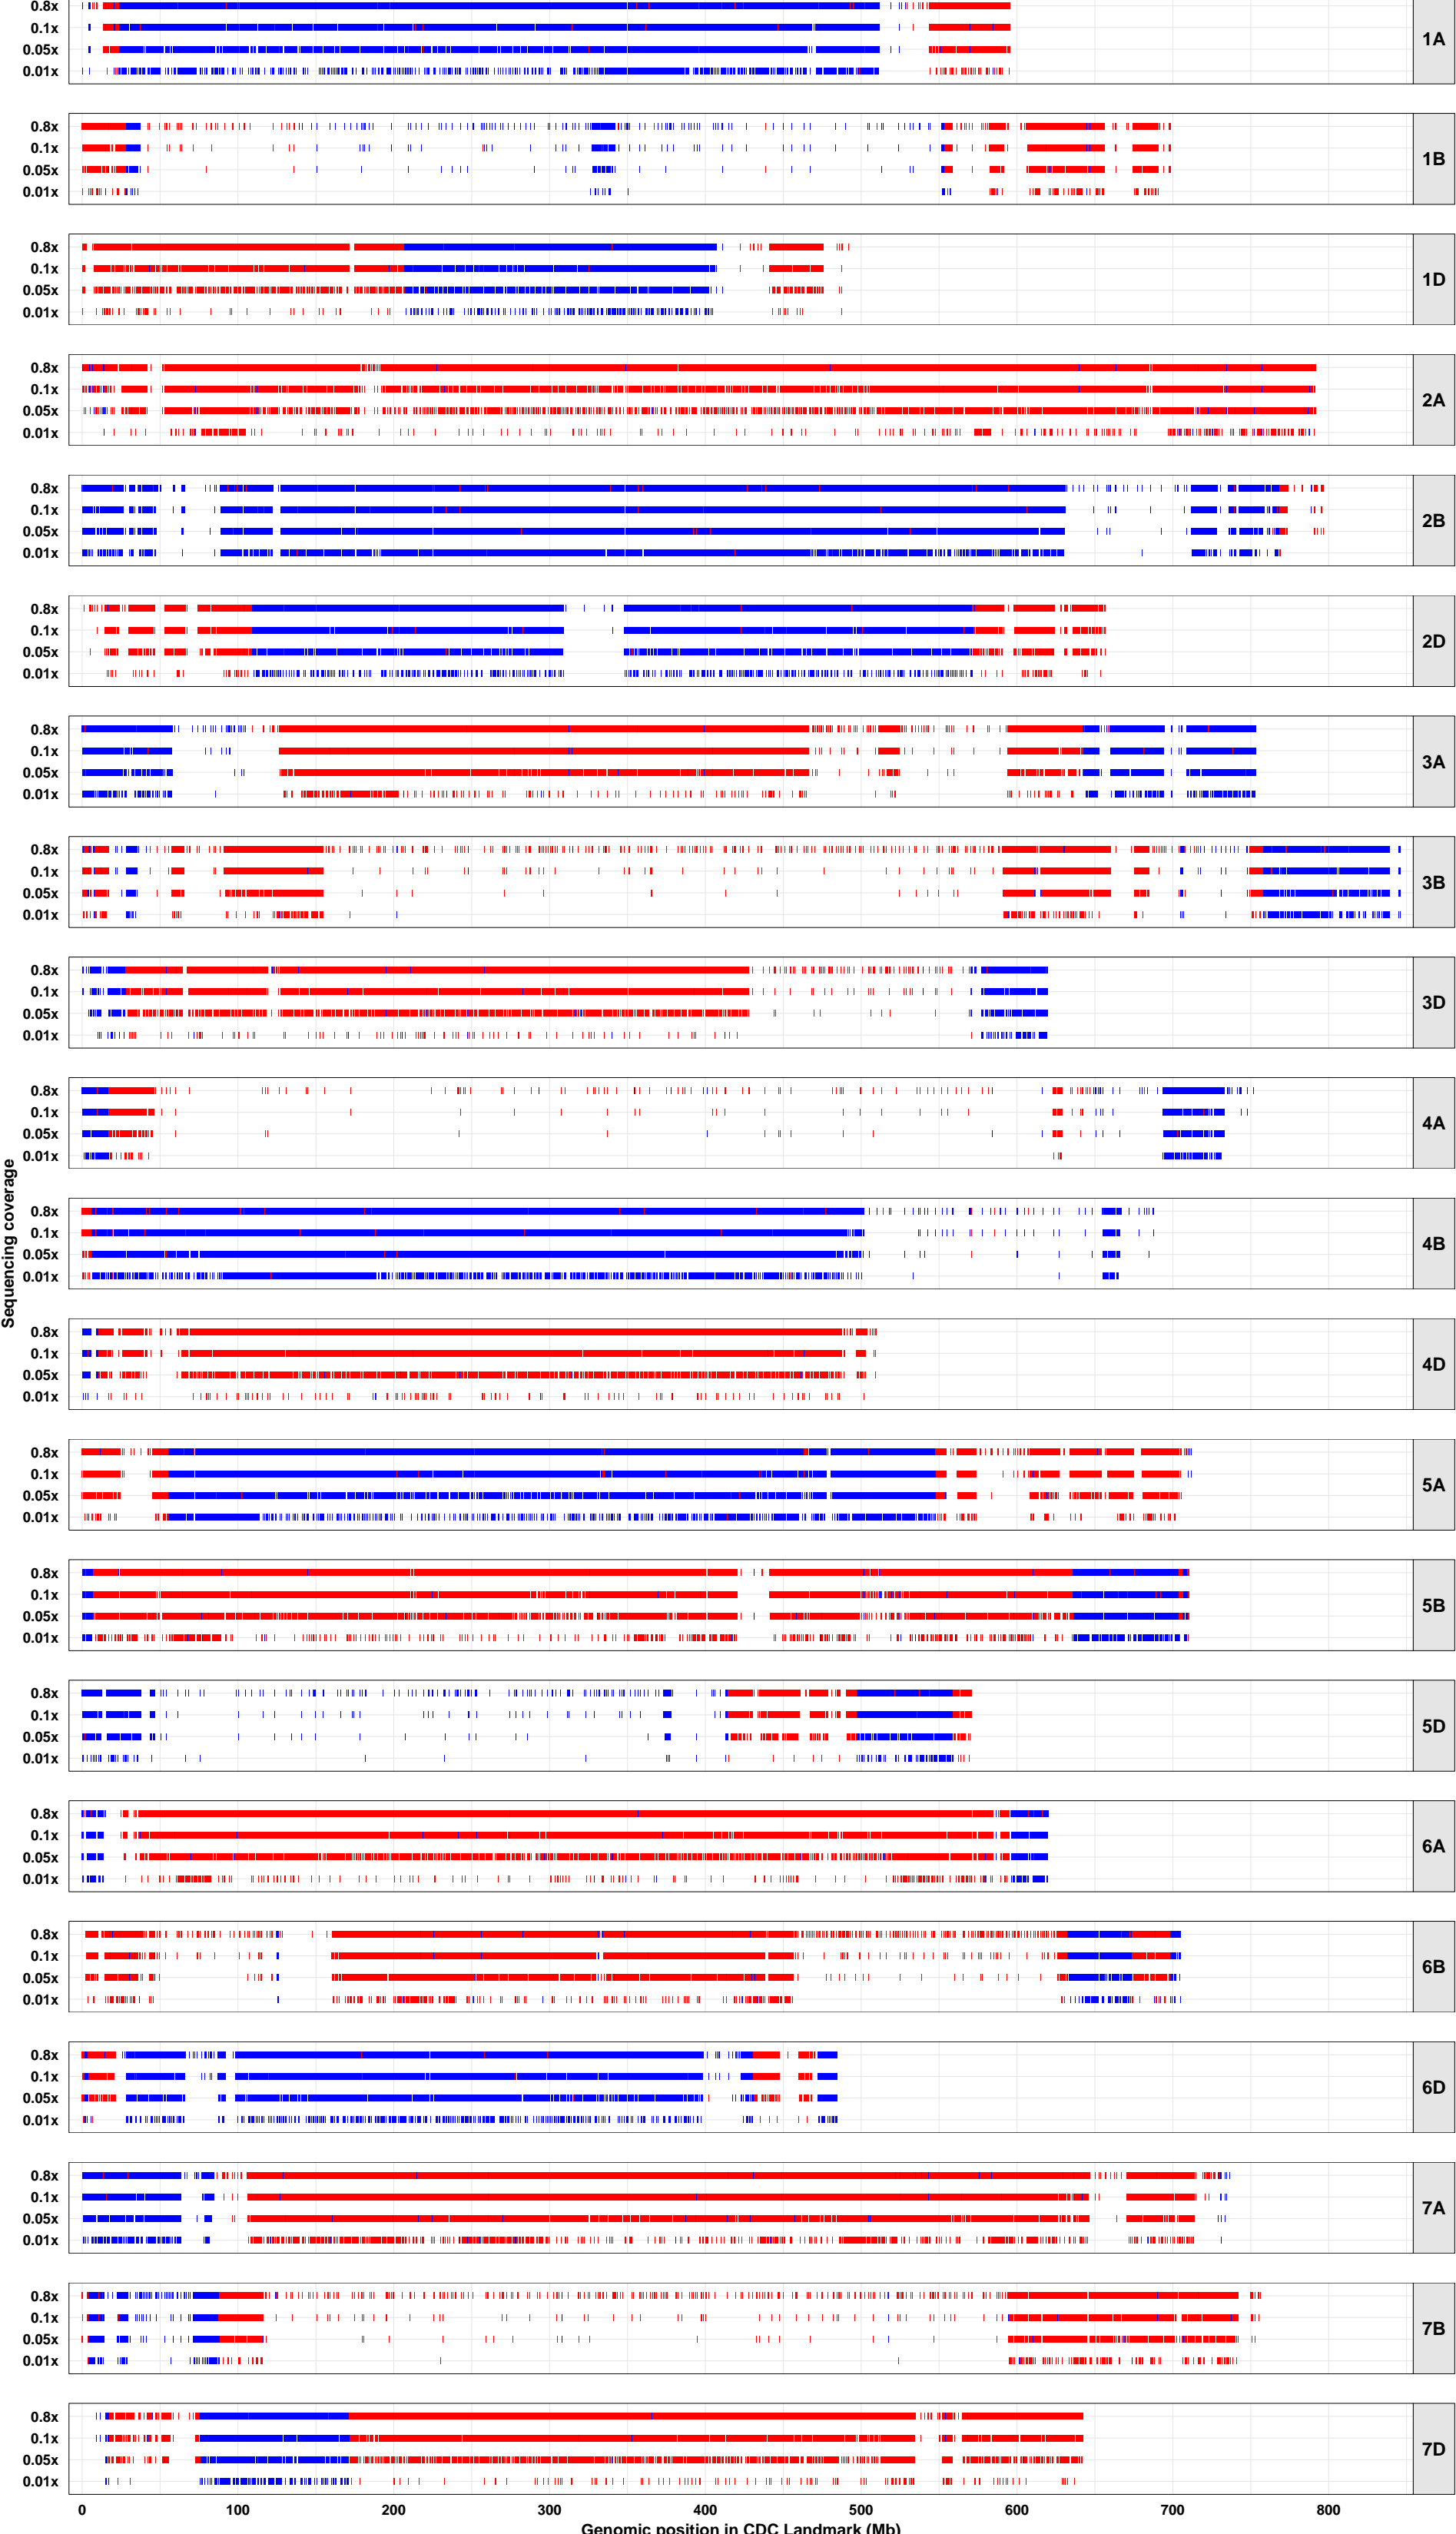

Supplement: Supplementary file 7 [file StanleyLandmarkDH01029-0.pdf › Supplementary-Figure-S3_StanleyLandmarkDH/StanleyLandmarkDH01029-0.pdf]

StanleyLandmarkKDHO1031-0

CDC Landmark CDC Stanley

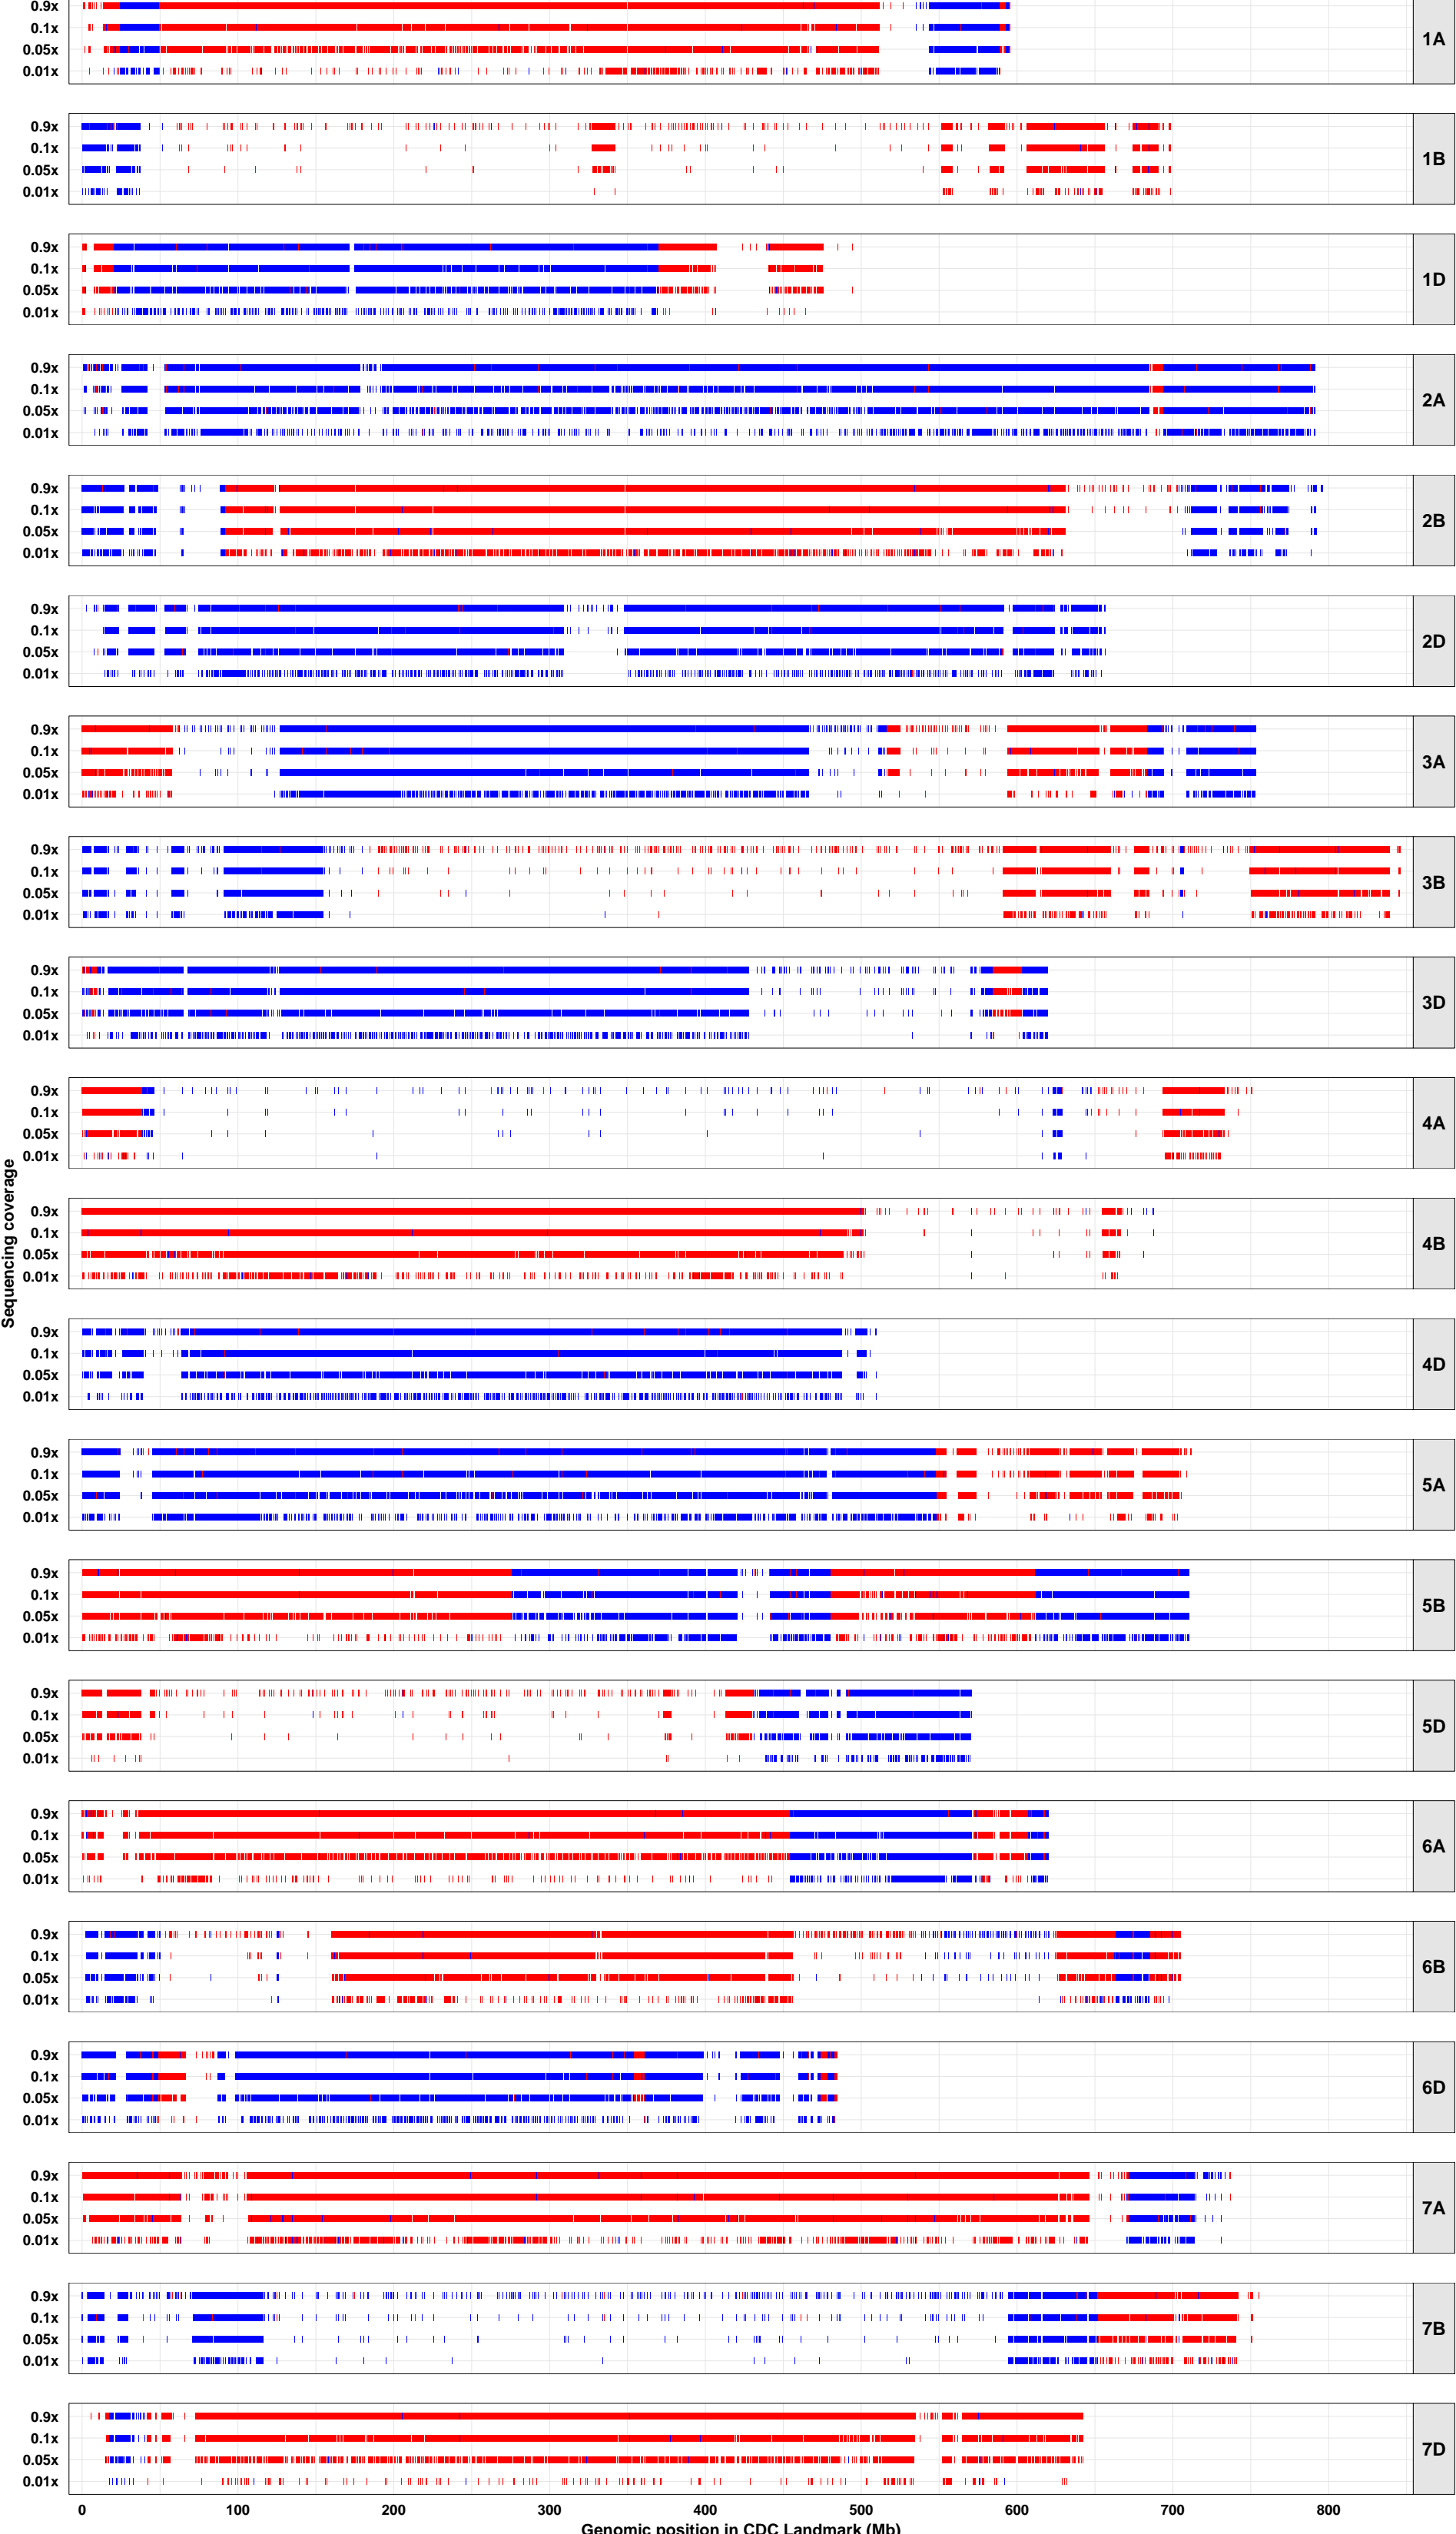

Supplement: Supplementary file 8 [file StanleyLandmarkDH01031-0.pdf › Supplementary-Figure-S3_StanleyLandmarkDH/StanleyLandmarkDH01031-0.pdf]

StanleyLandmarkKDHO1035-0

CDC Landmark CDC Stanley

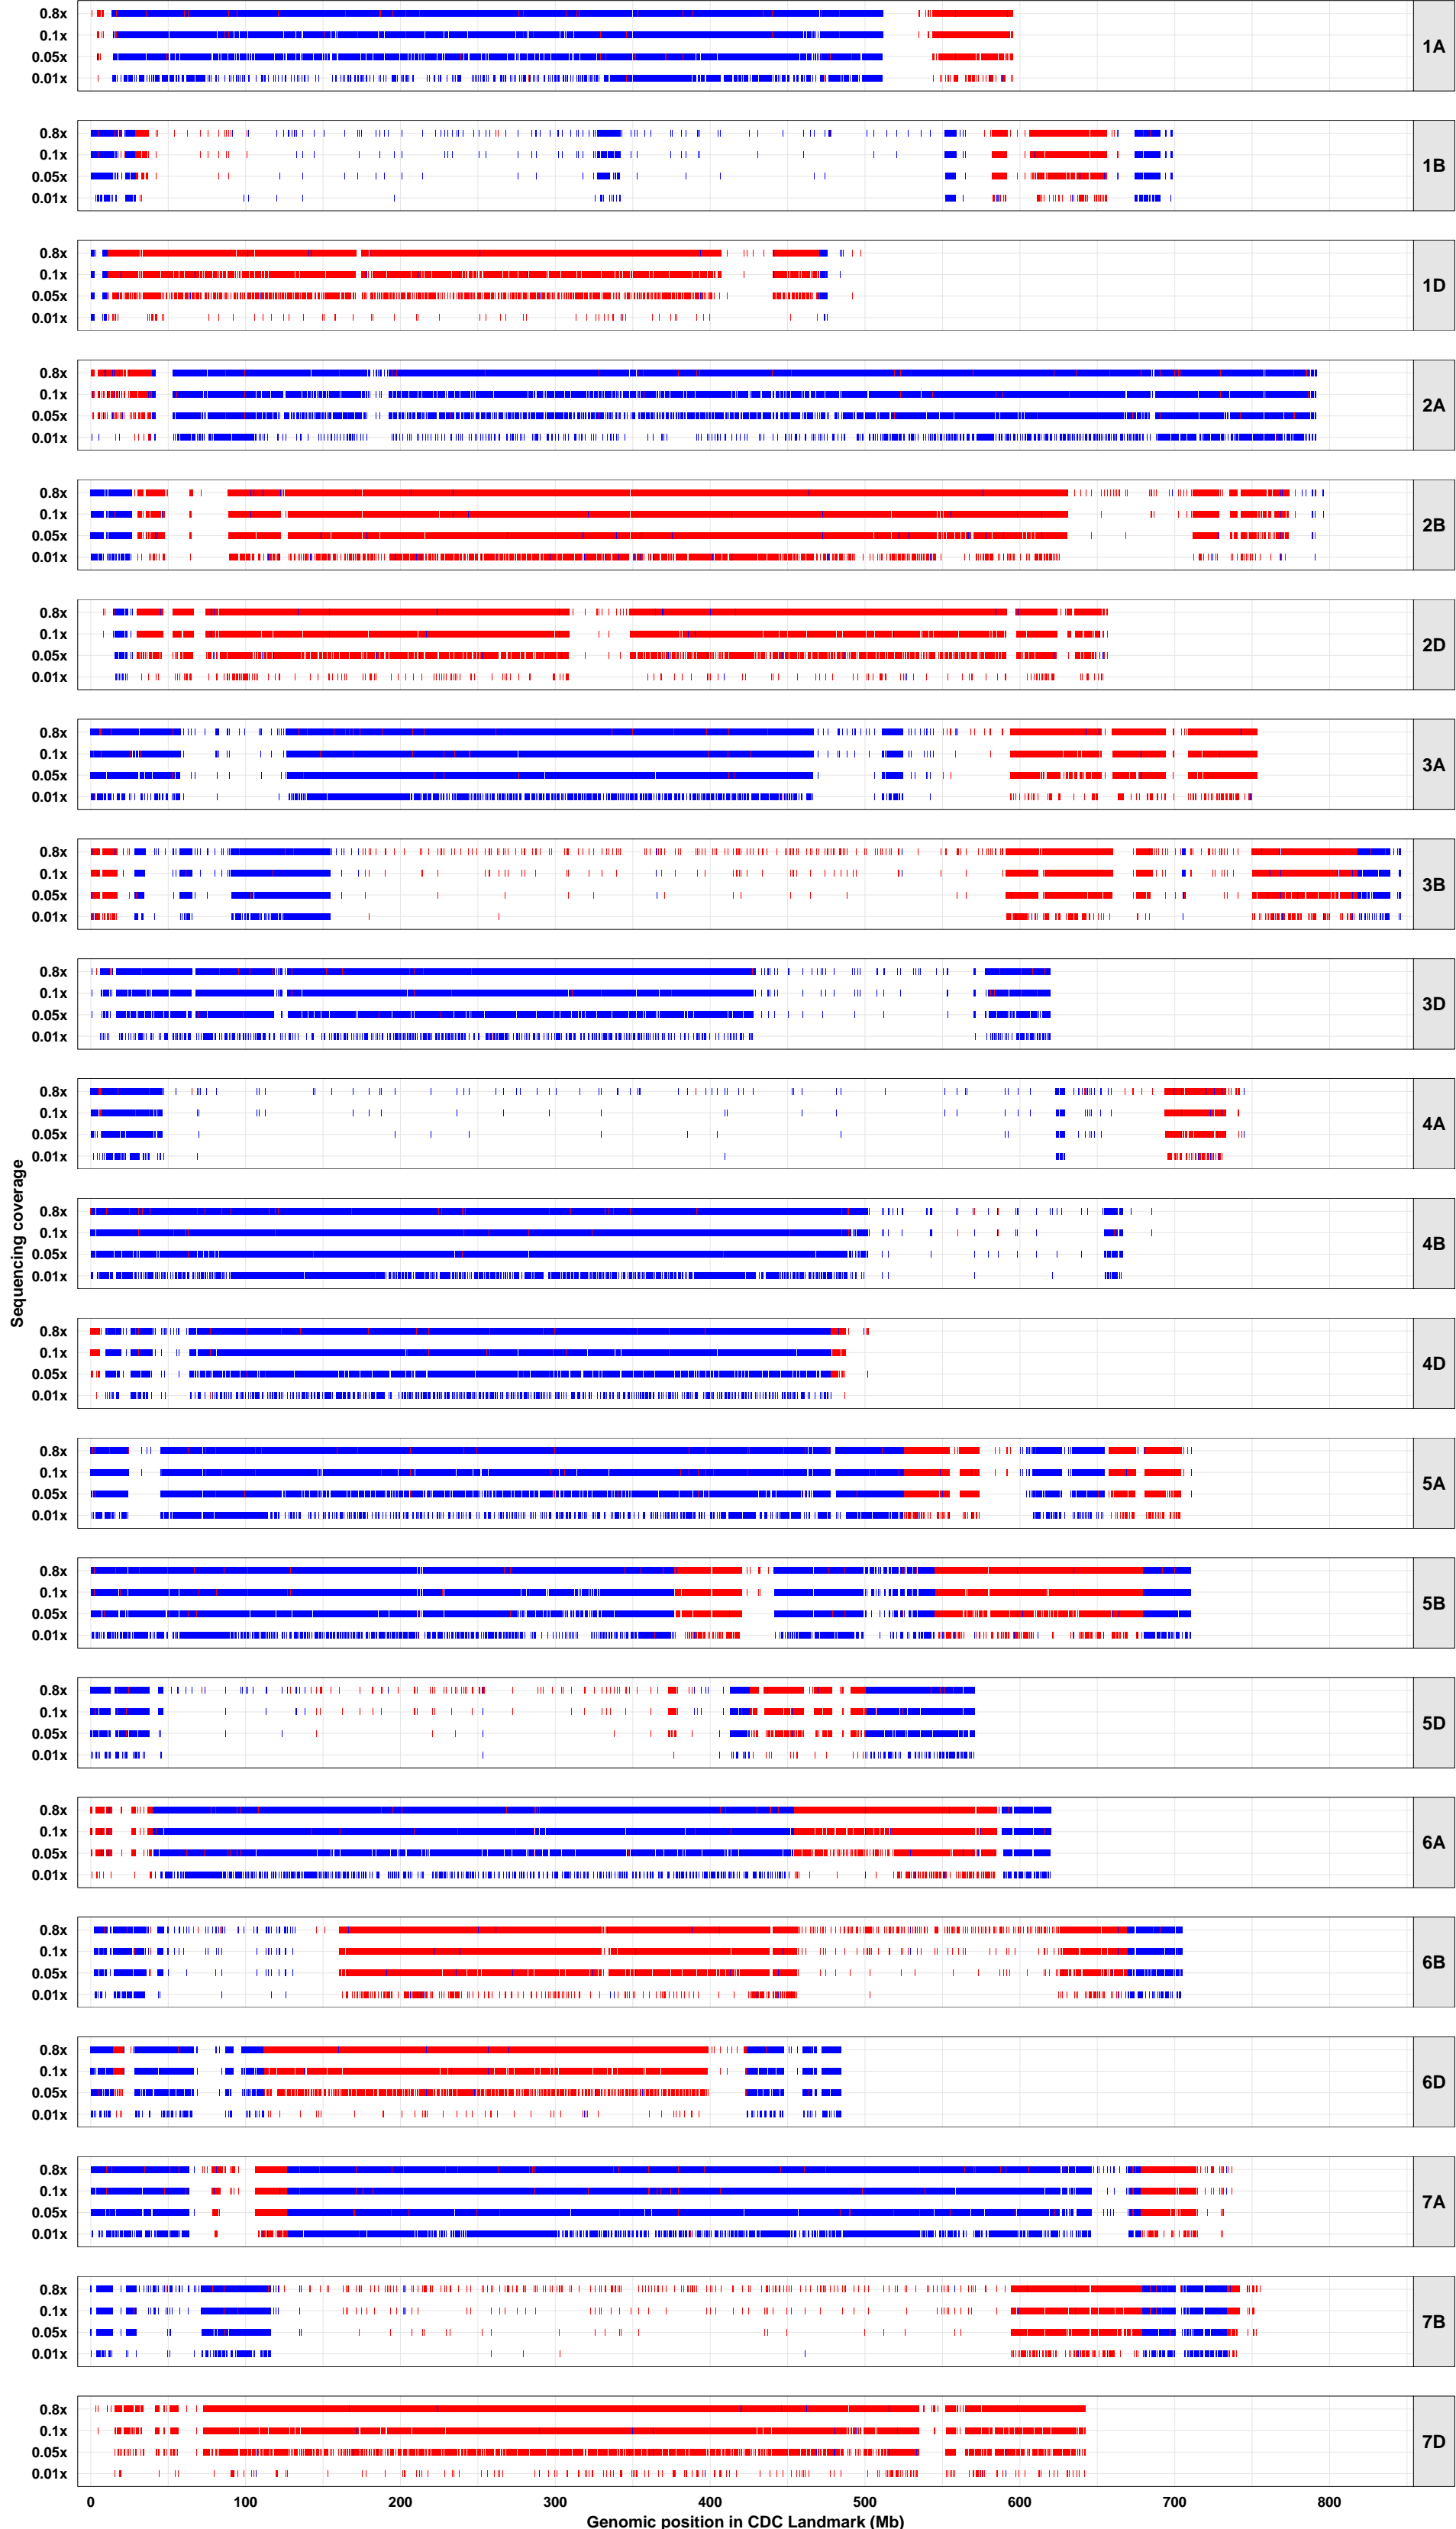

Supplement: Supplementary file 9 [file StanleyLandmarkDH01035-0.pdf › Supplementary-Figure-S3_StanleyLandmarkDH/StanleyLandmarkDH01035-0.pdf]

StanleyLandmarkDH01036-0

CDC Landmark CDC Stanley

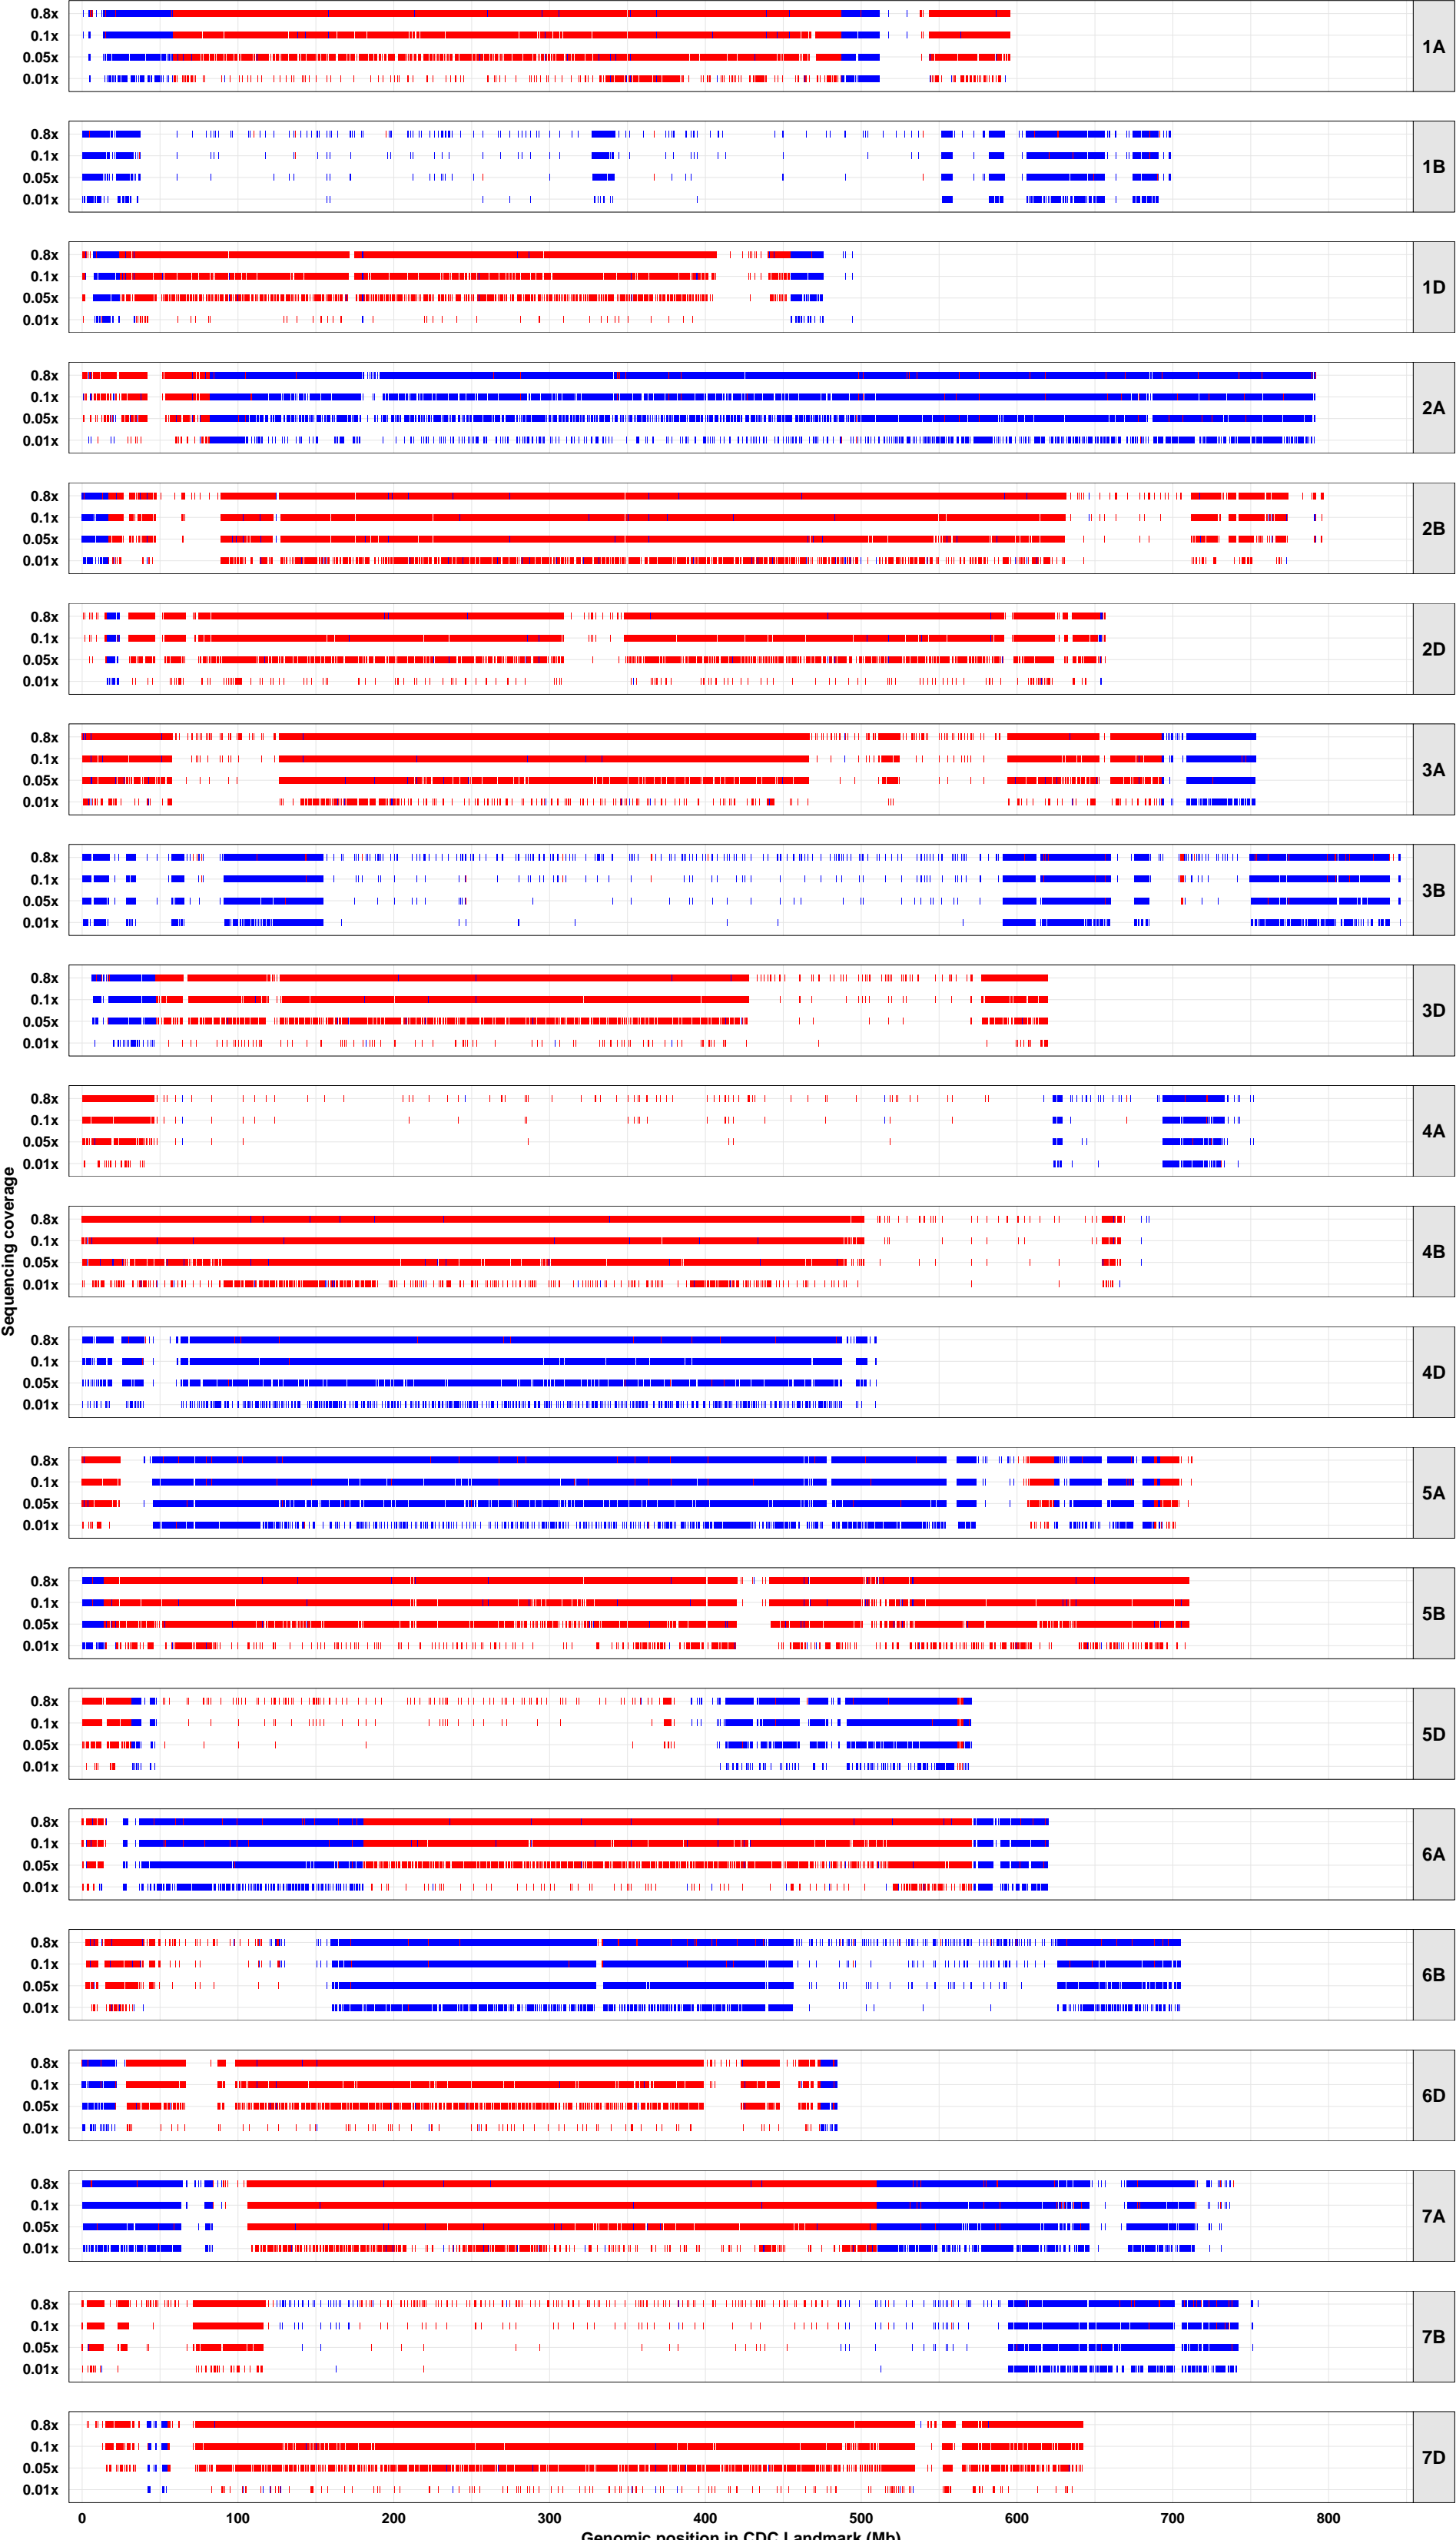

Supplement: Supplementary file 10 [file StanleyLandmarkDH01036-0.pdf › Supplementary-Figure-S3_StanleyLandmarkDH/StanleyLandmarkDH01036-0.pdf]

StanleyLandmarkDH01037-0

CDC Landmark CDC Stanley

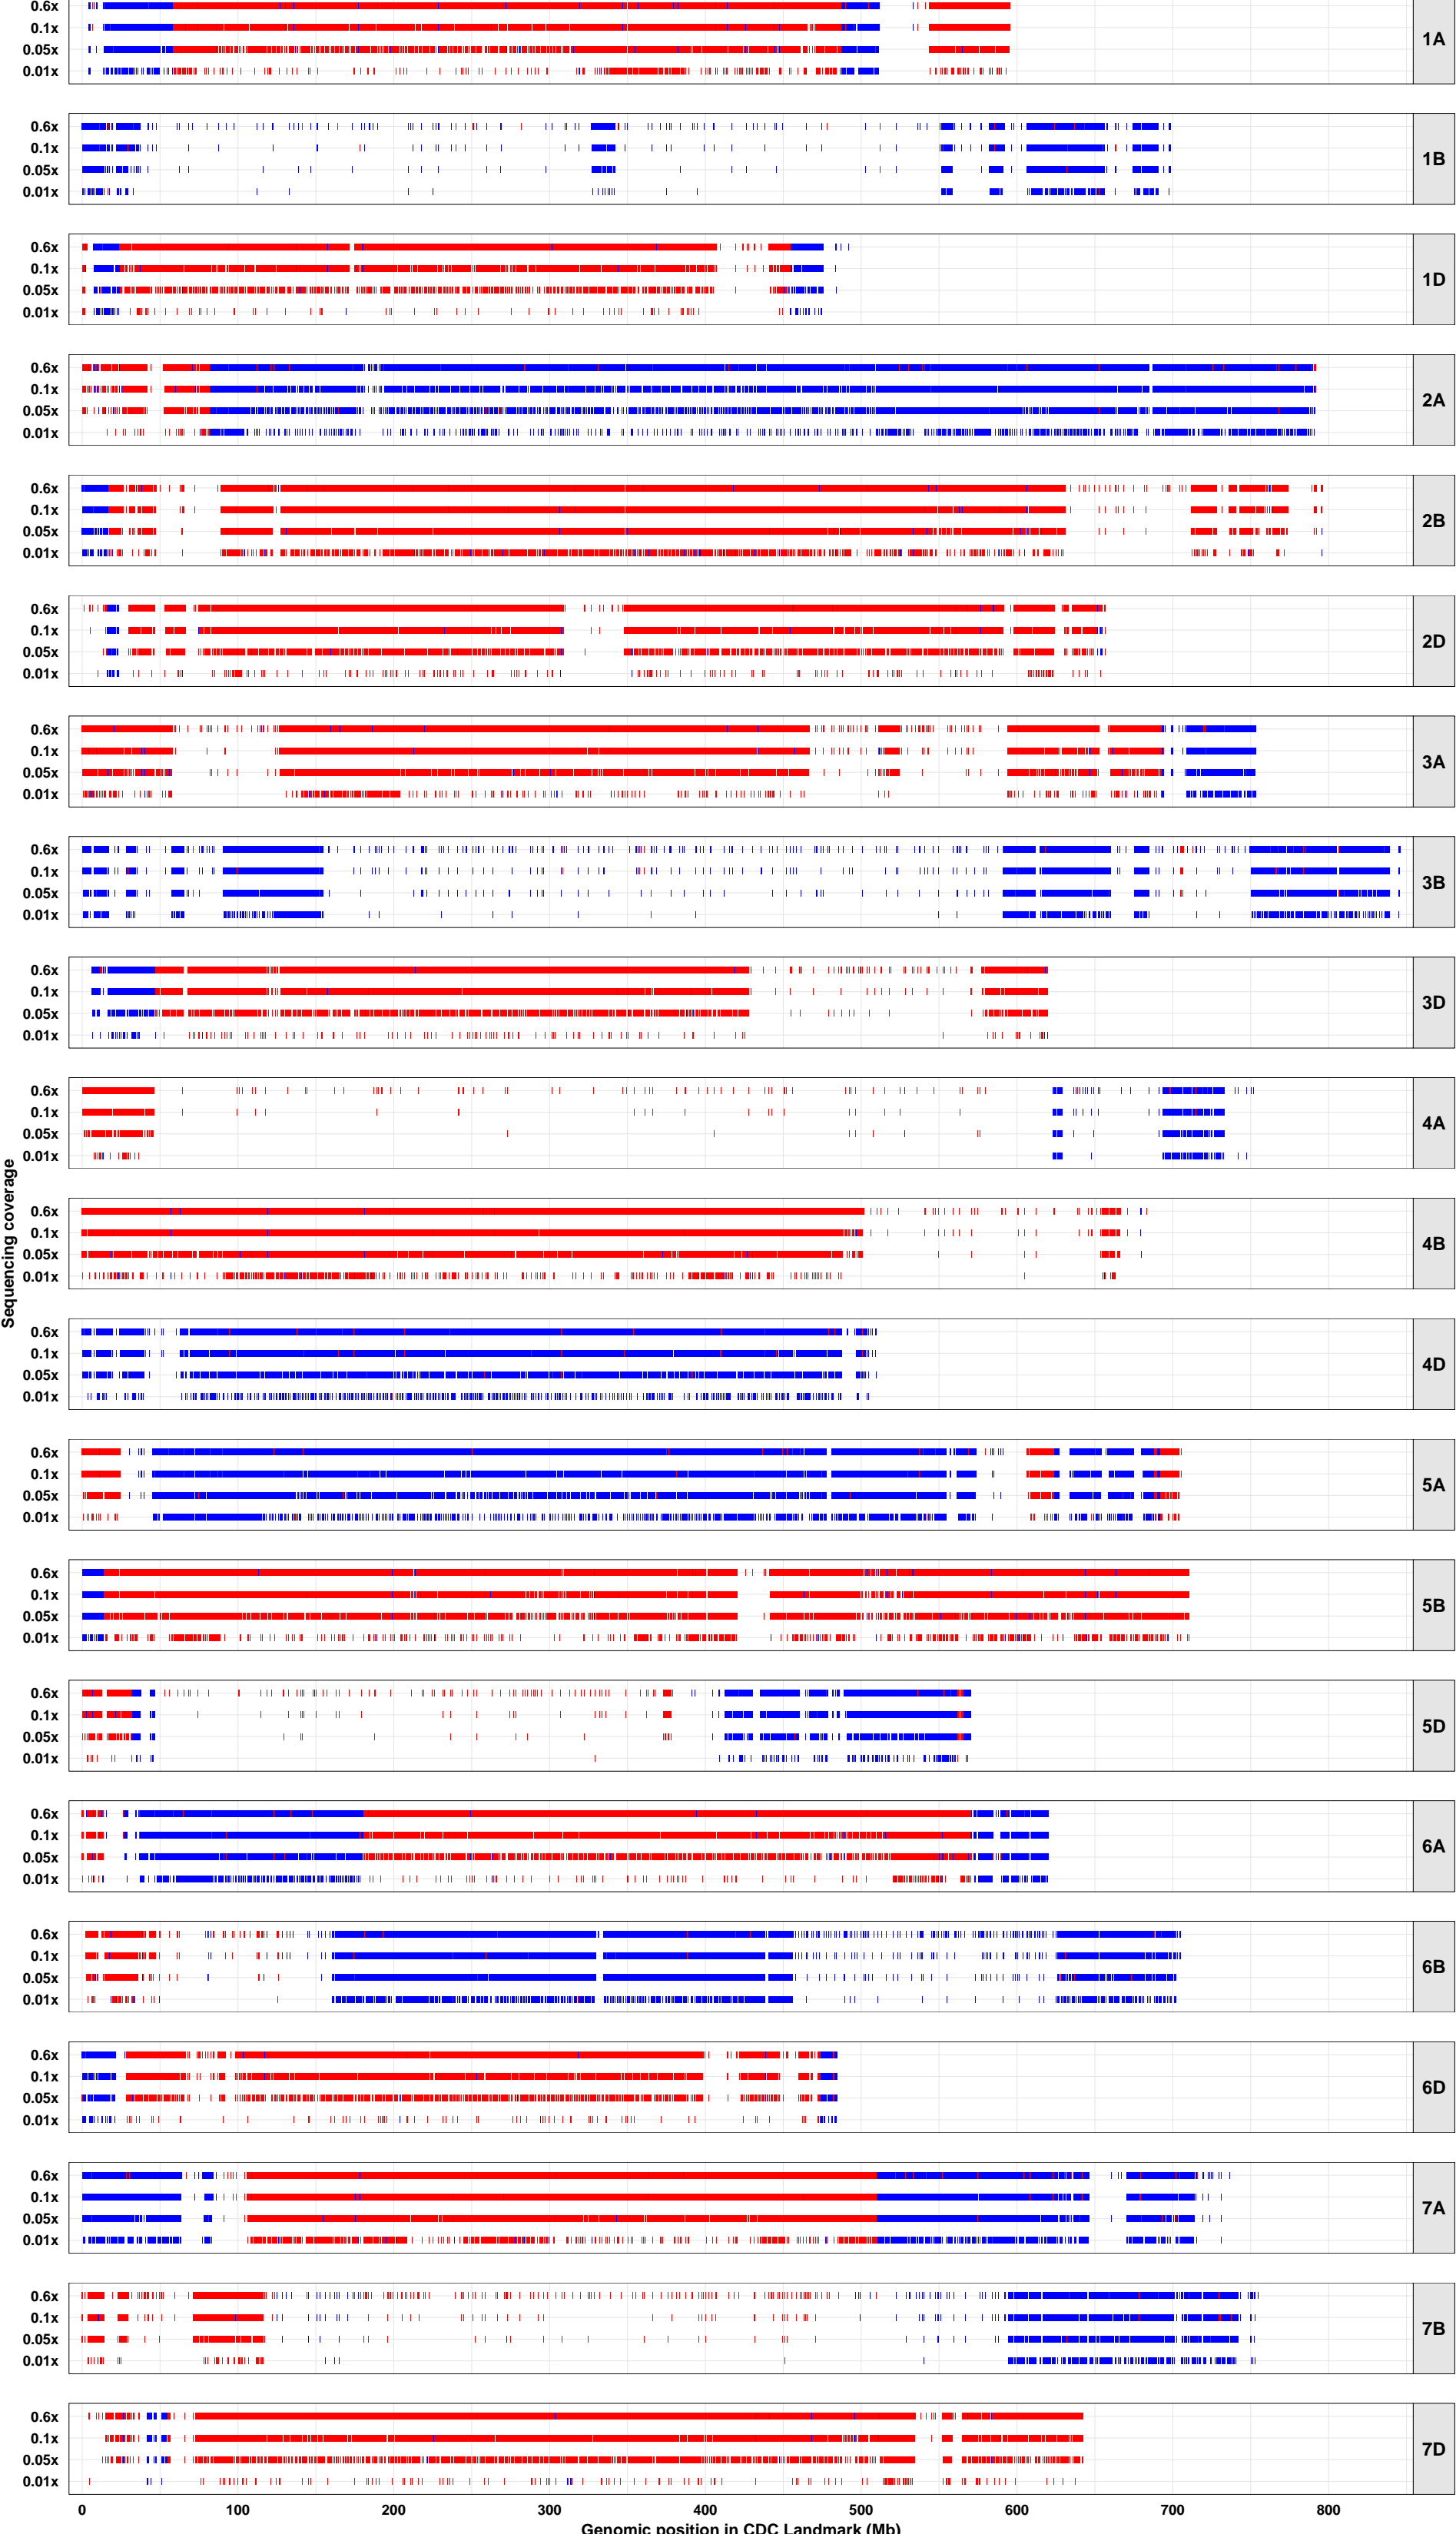

Supplement: Supplementary file 11 [file StanleyLandmarkDH01037-0.pdf › Supplementary-Figure-S3_StanleyLandmarkDH/StanleyLandmarkDH01037-0.pdf]

StanleyLandmarkKDHO1038-0

CDC Landmark CDC Stanley

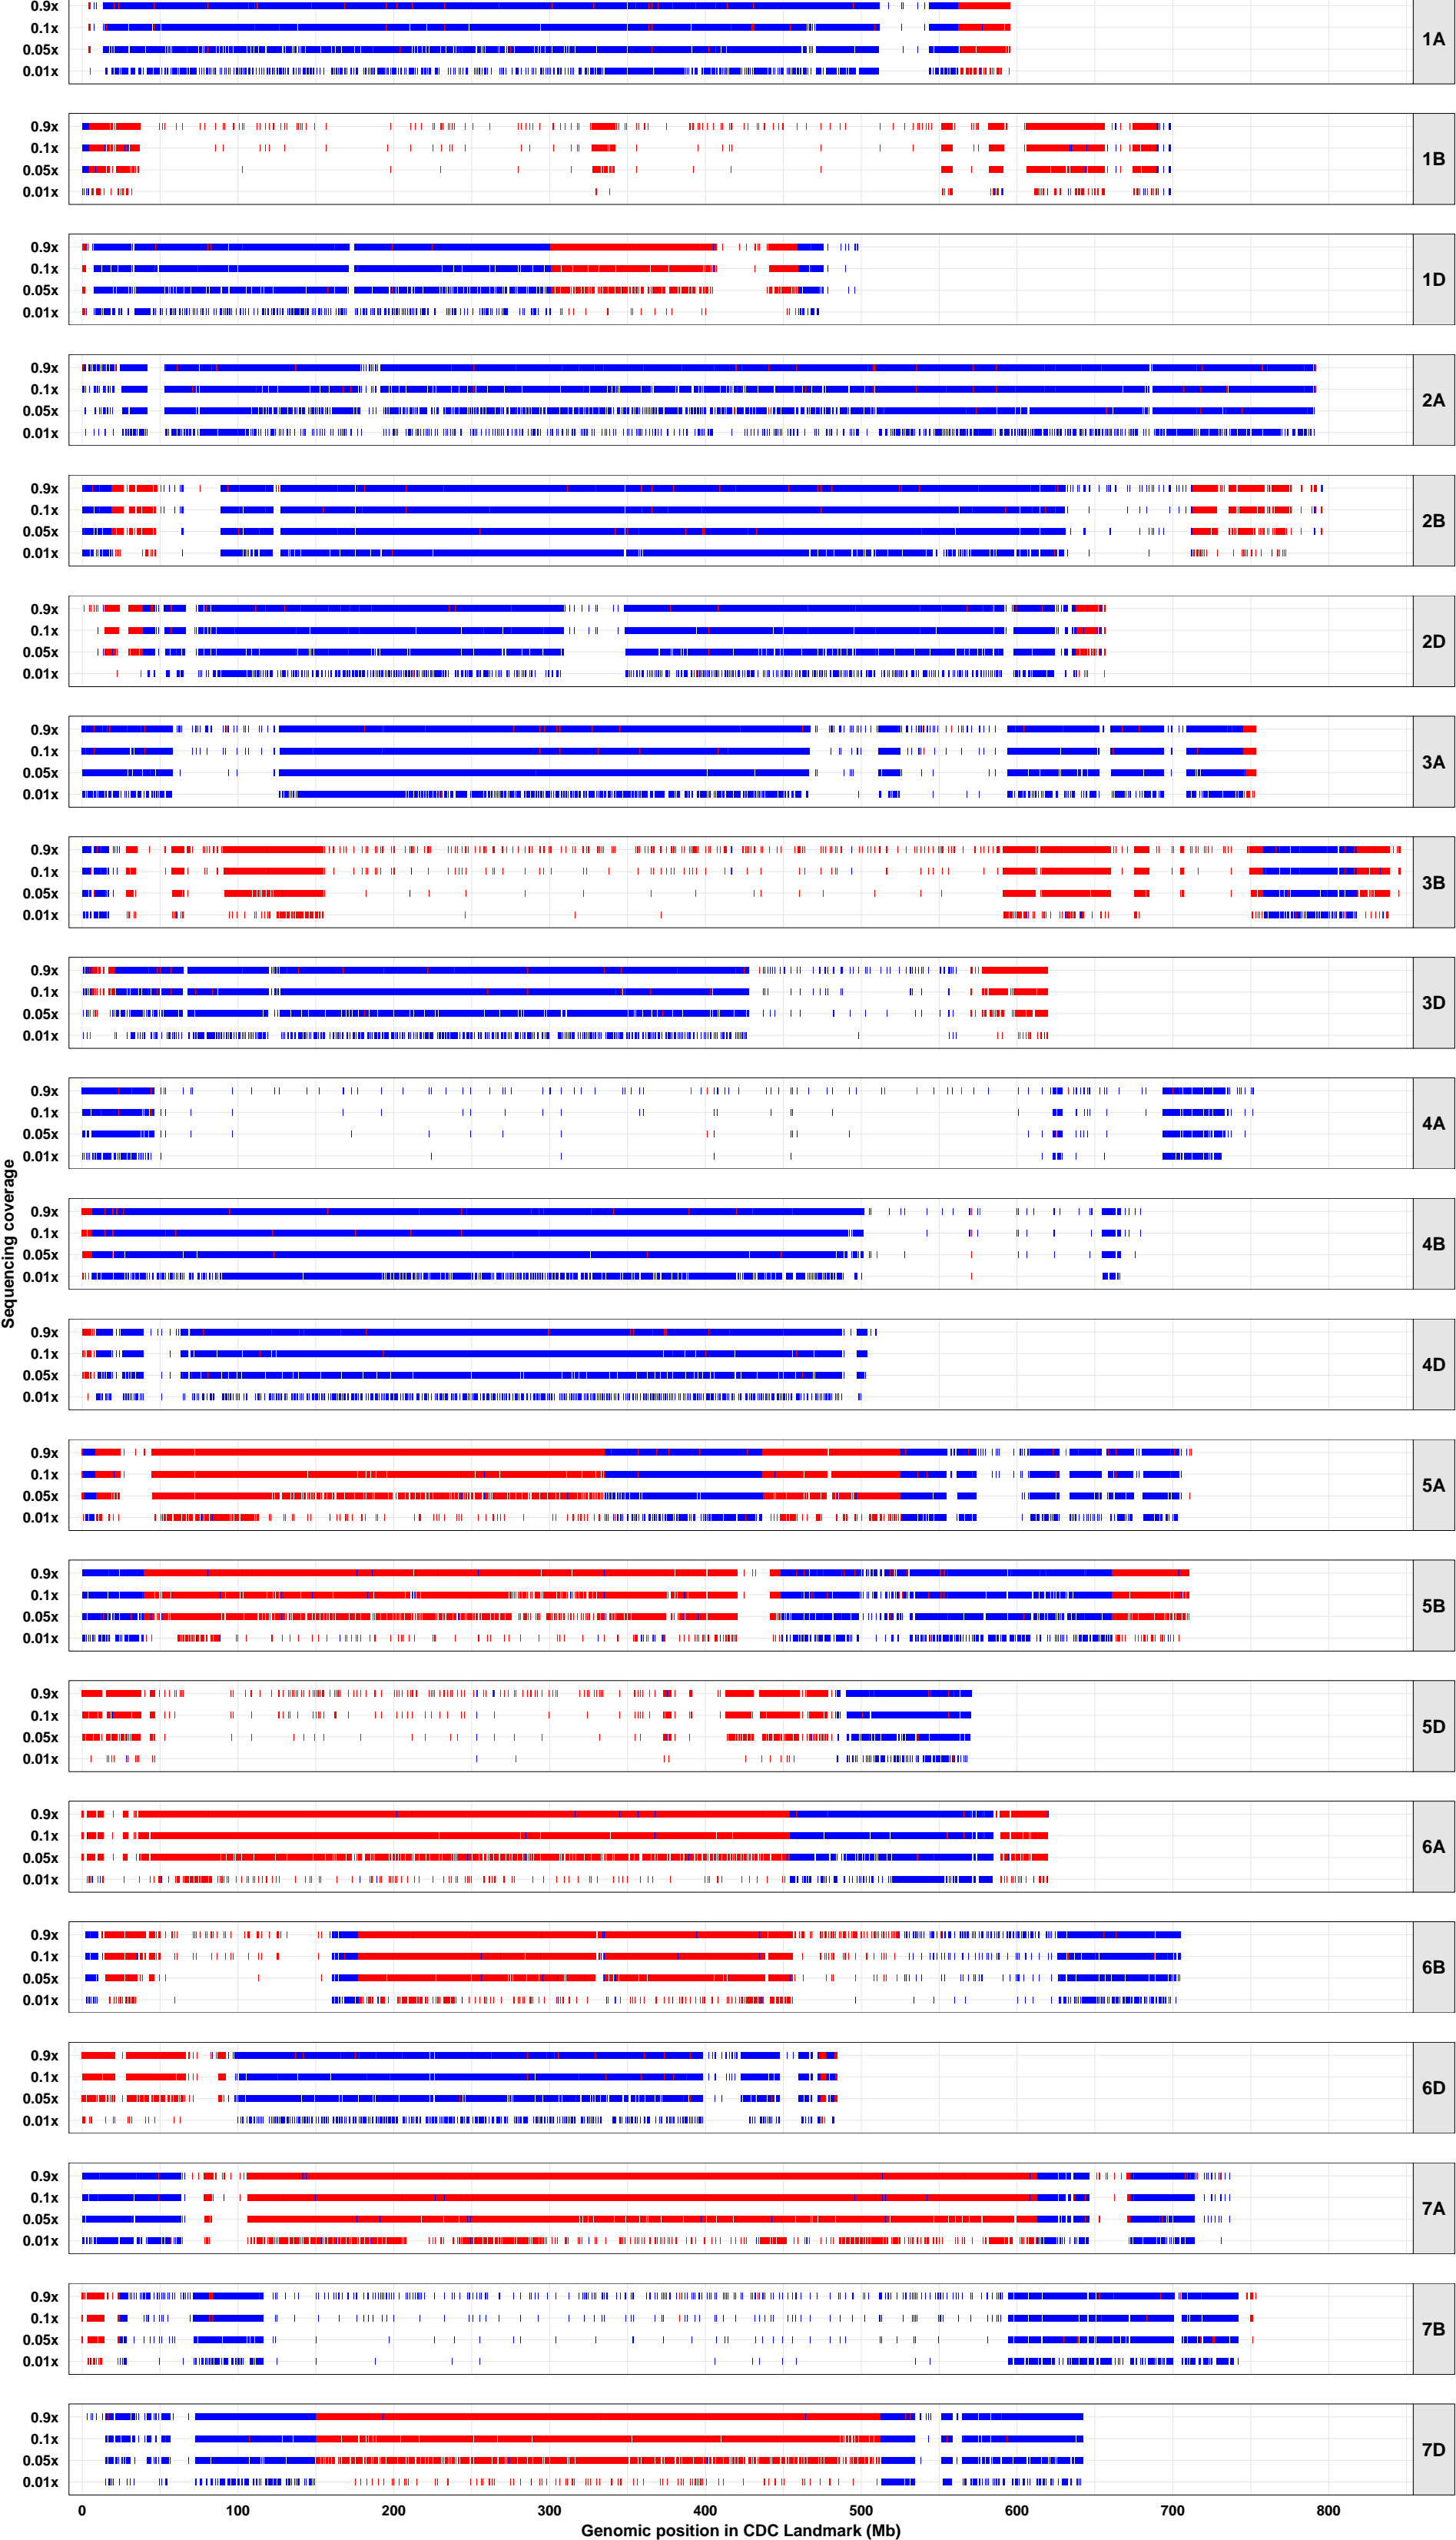

Supplement: Supplementary file 12 [file StanleyLandmarkDH01038-0.pdf › Supplementary-Figure-S3_StanleyLandmarkDH/StanleyLandmarkDH01038-0.pdf]

StanleyLandmarkKH01052-0

CDC Landmark CDC Stanley

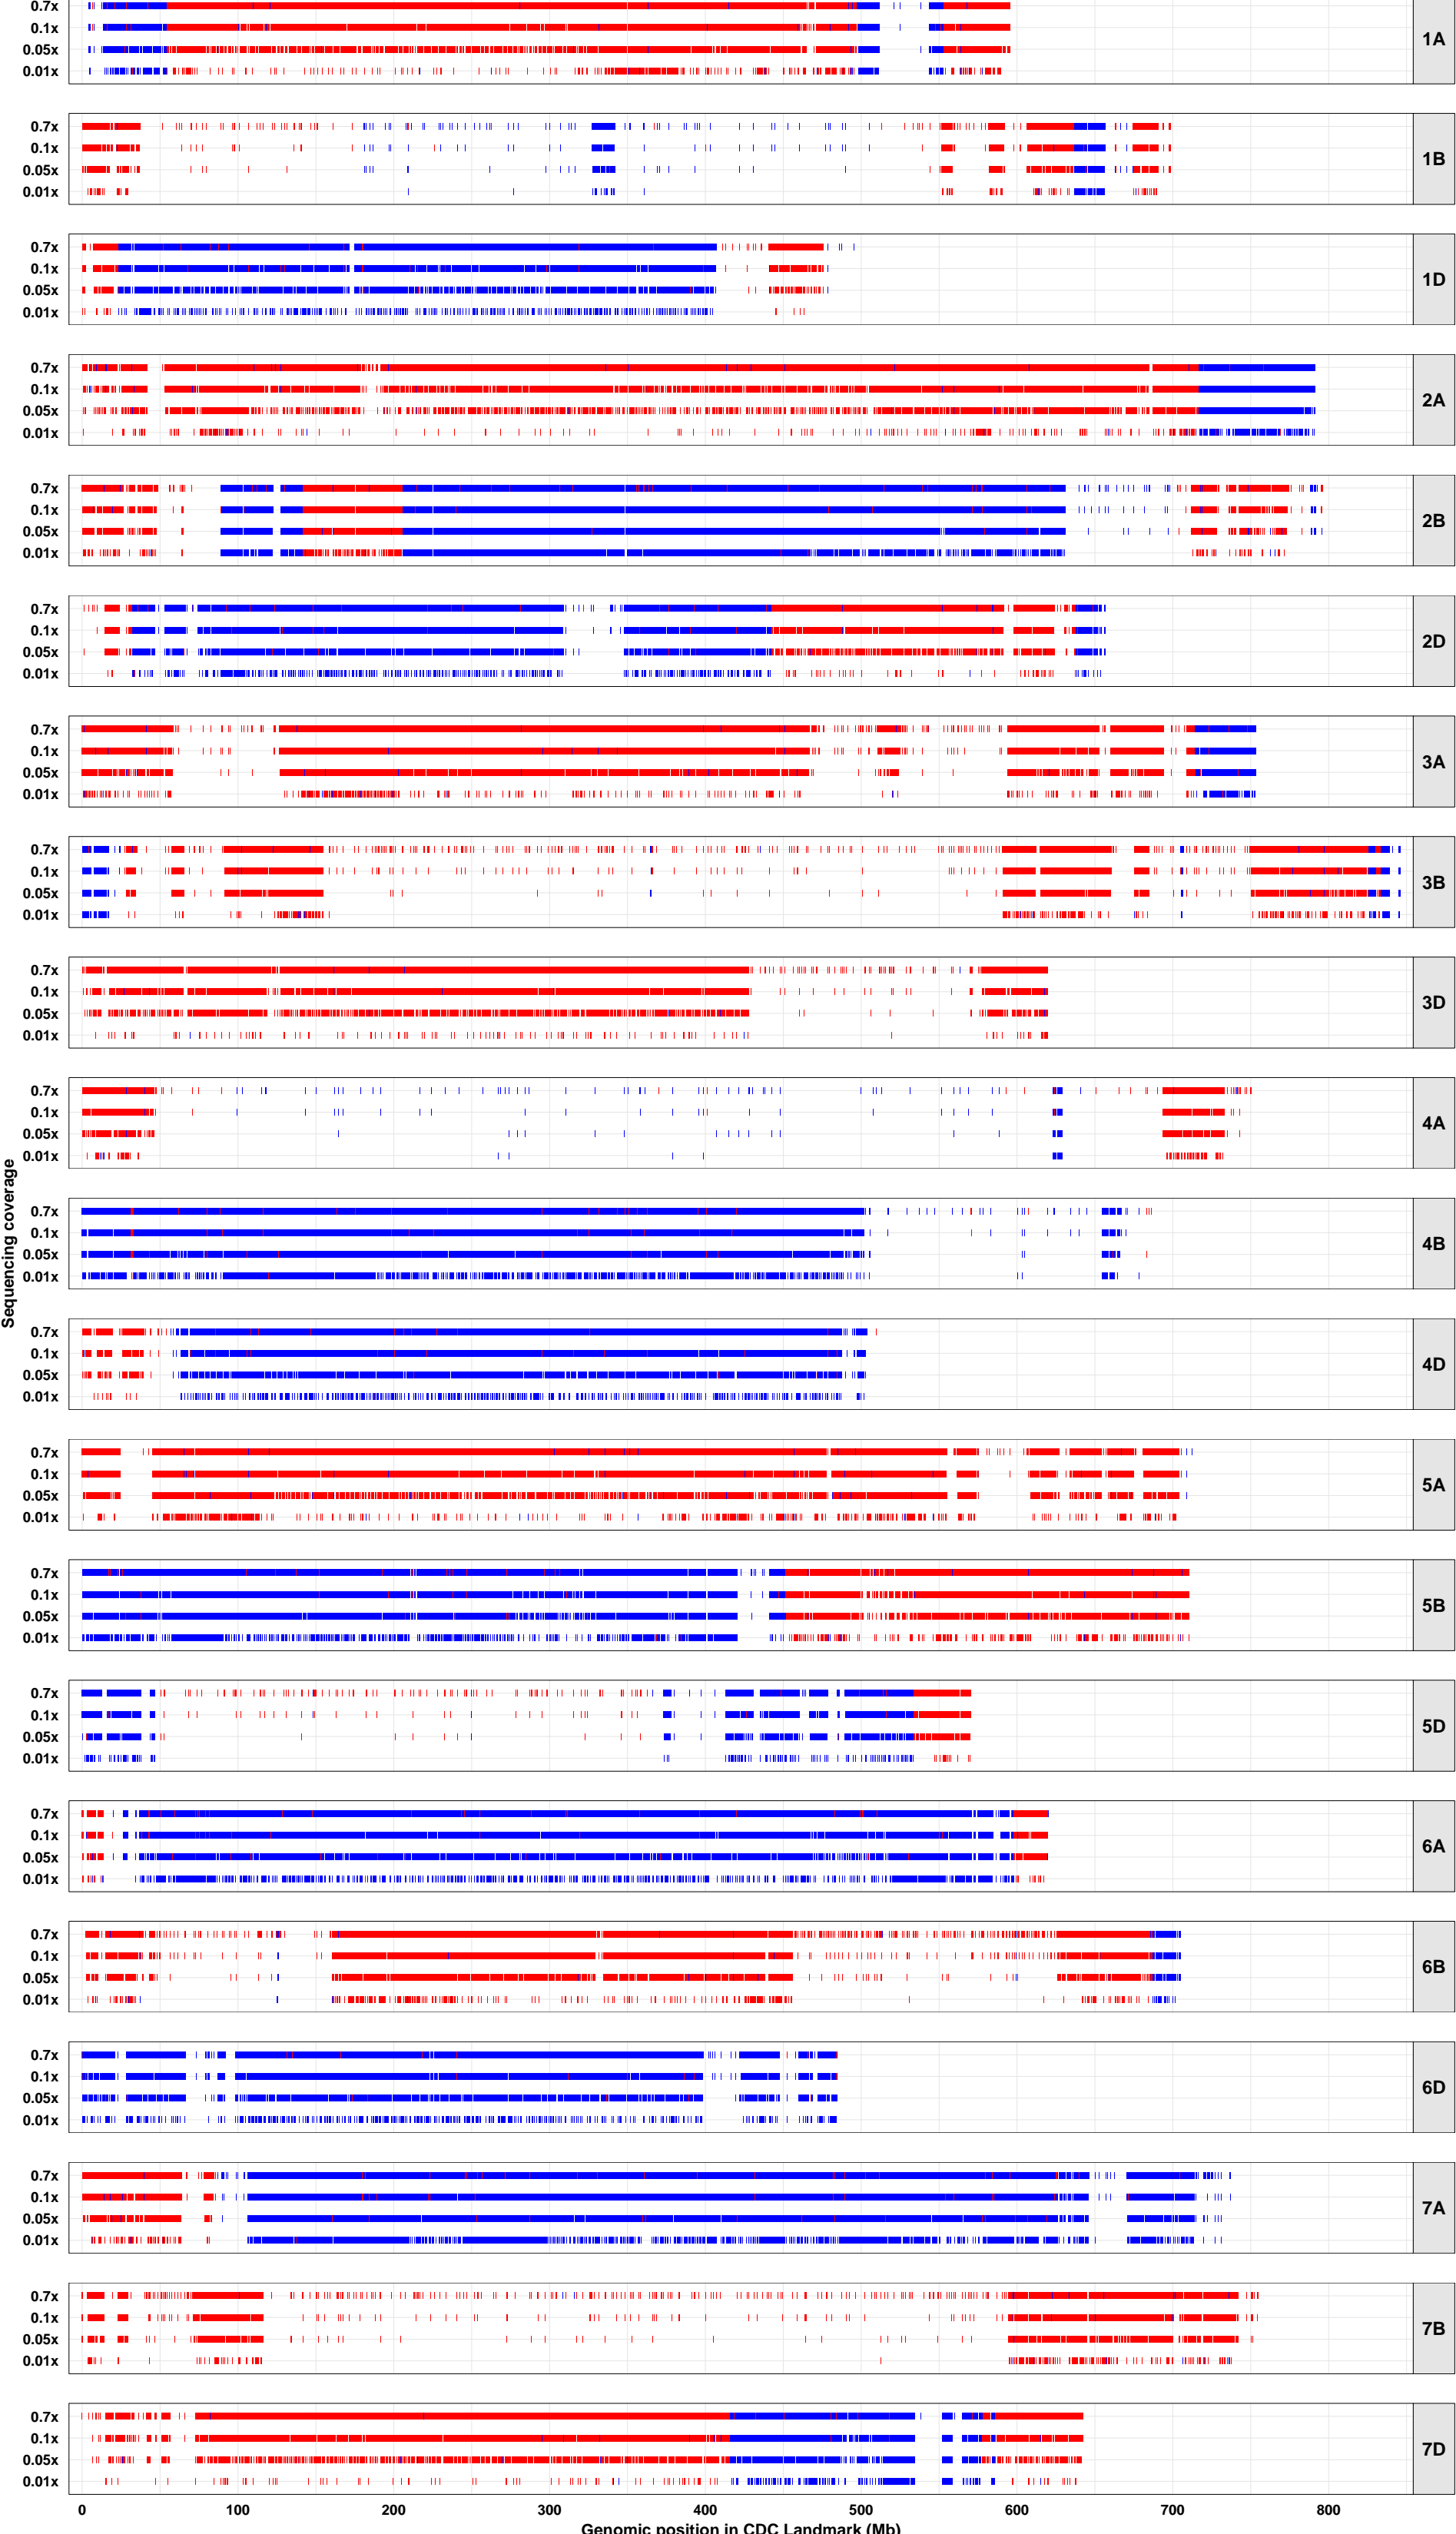

Supplement: Supplementary file 13 [file StanleyLandmarkDH01052-0.pdf › Supplementary-Figure-S3_StanleyLandmarkDH/StanleyLandmarkDH01052-0.pdf]

StanleyLandmarkKDHO1053-0

CDC Landmark CDC Stanley

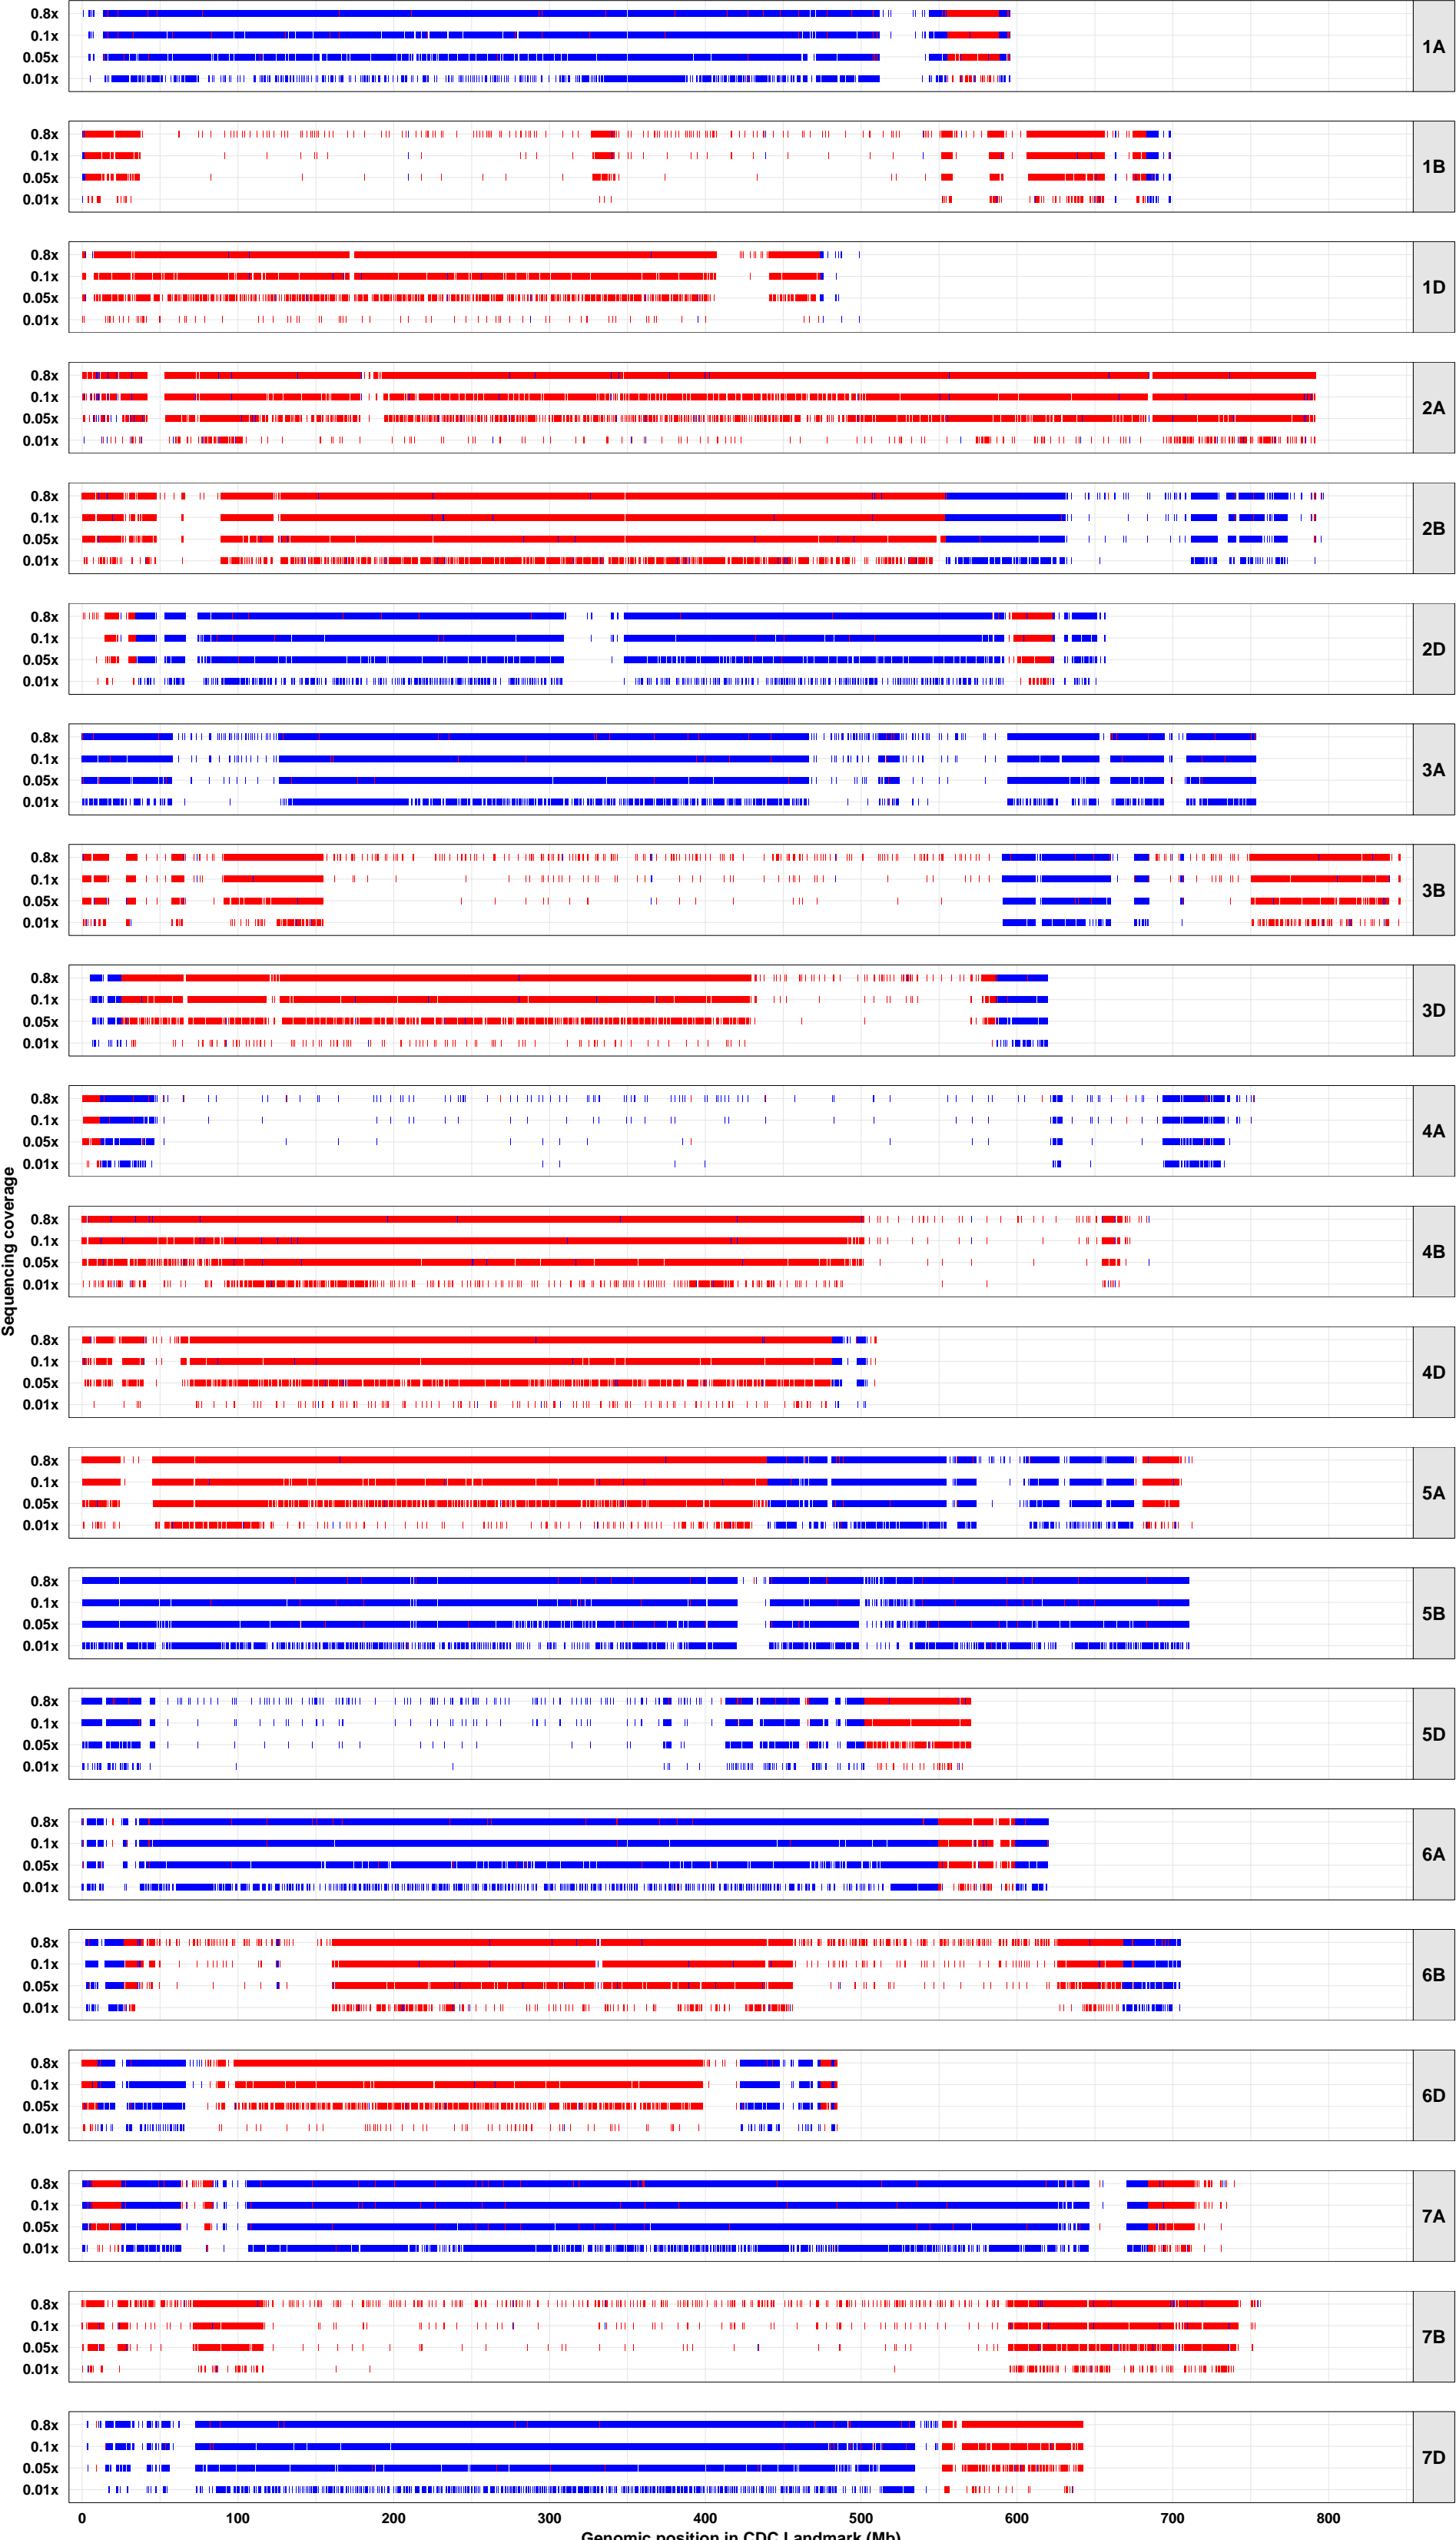

Supplement: Supplementary file 14 [file StanleyLandmarkDH01053-0.pdf › Supplementary-Figure-S3_StanleyLandmarkDH/StanleyLandmarkDH01053-0.pdf]

StanleyLandmarkDH01056-0

CDC Landmark CDC Stanley

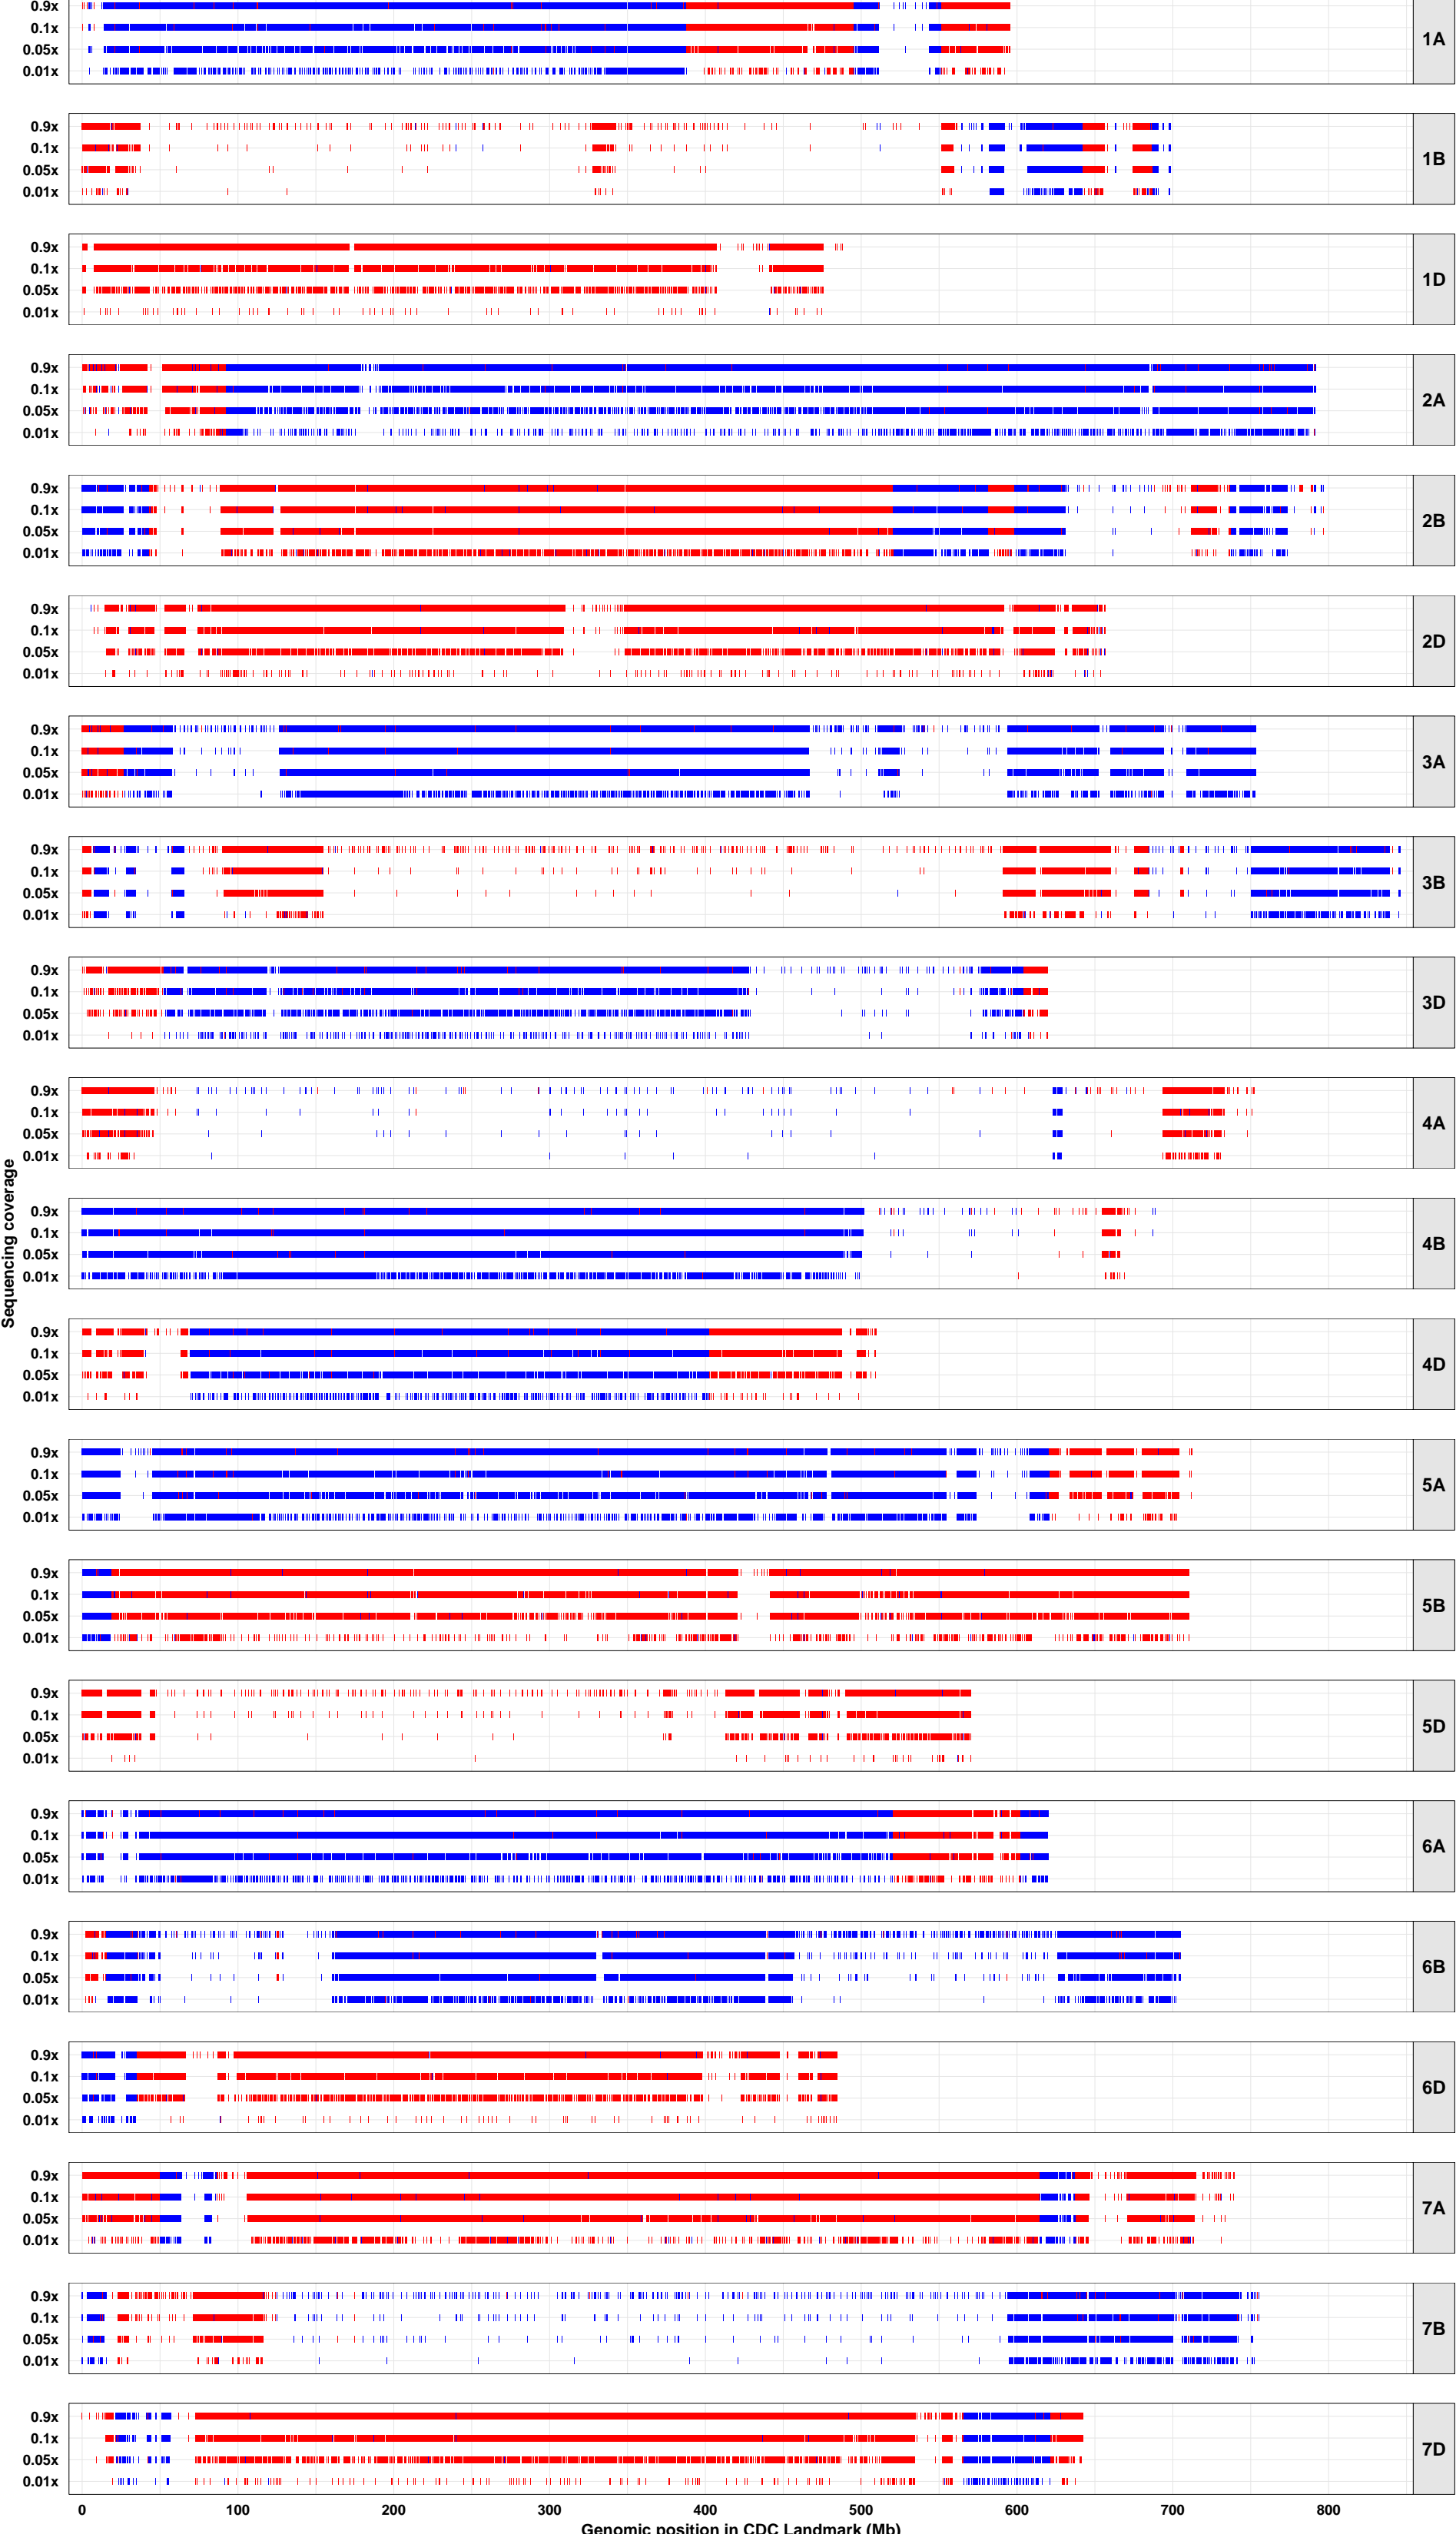

Supplement: Supplementary file 15 [file StanleyLandmarkDH01056-0.pdf › Supplementary-Figure-S3_StanleyLandmarkDH/StanleyLandmarkDH01056-0.pdf]

StanleyLandmarkDH01058-0

CDC Landmark CDC Stanley

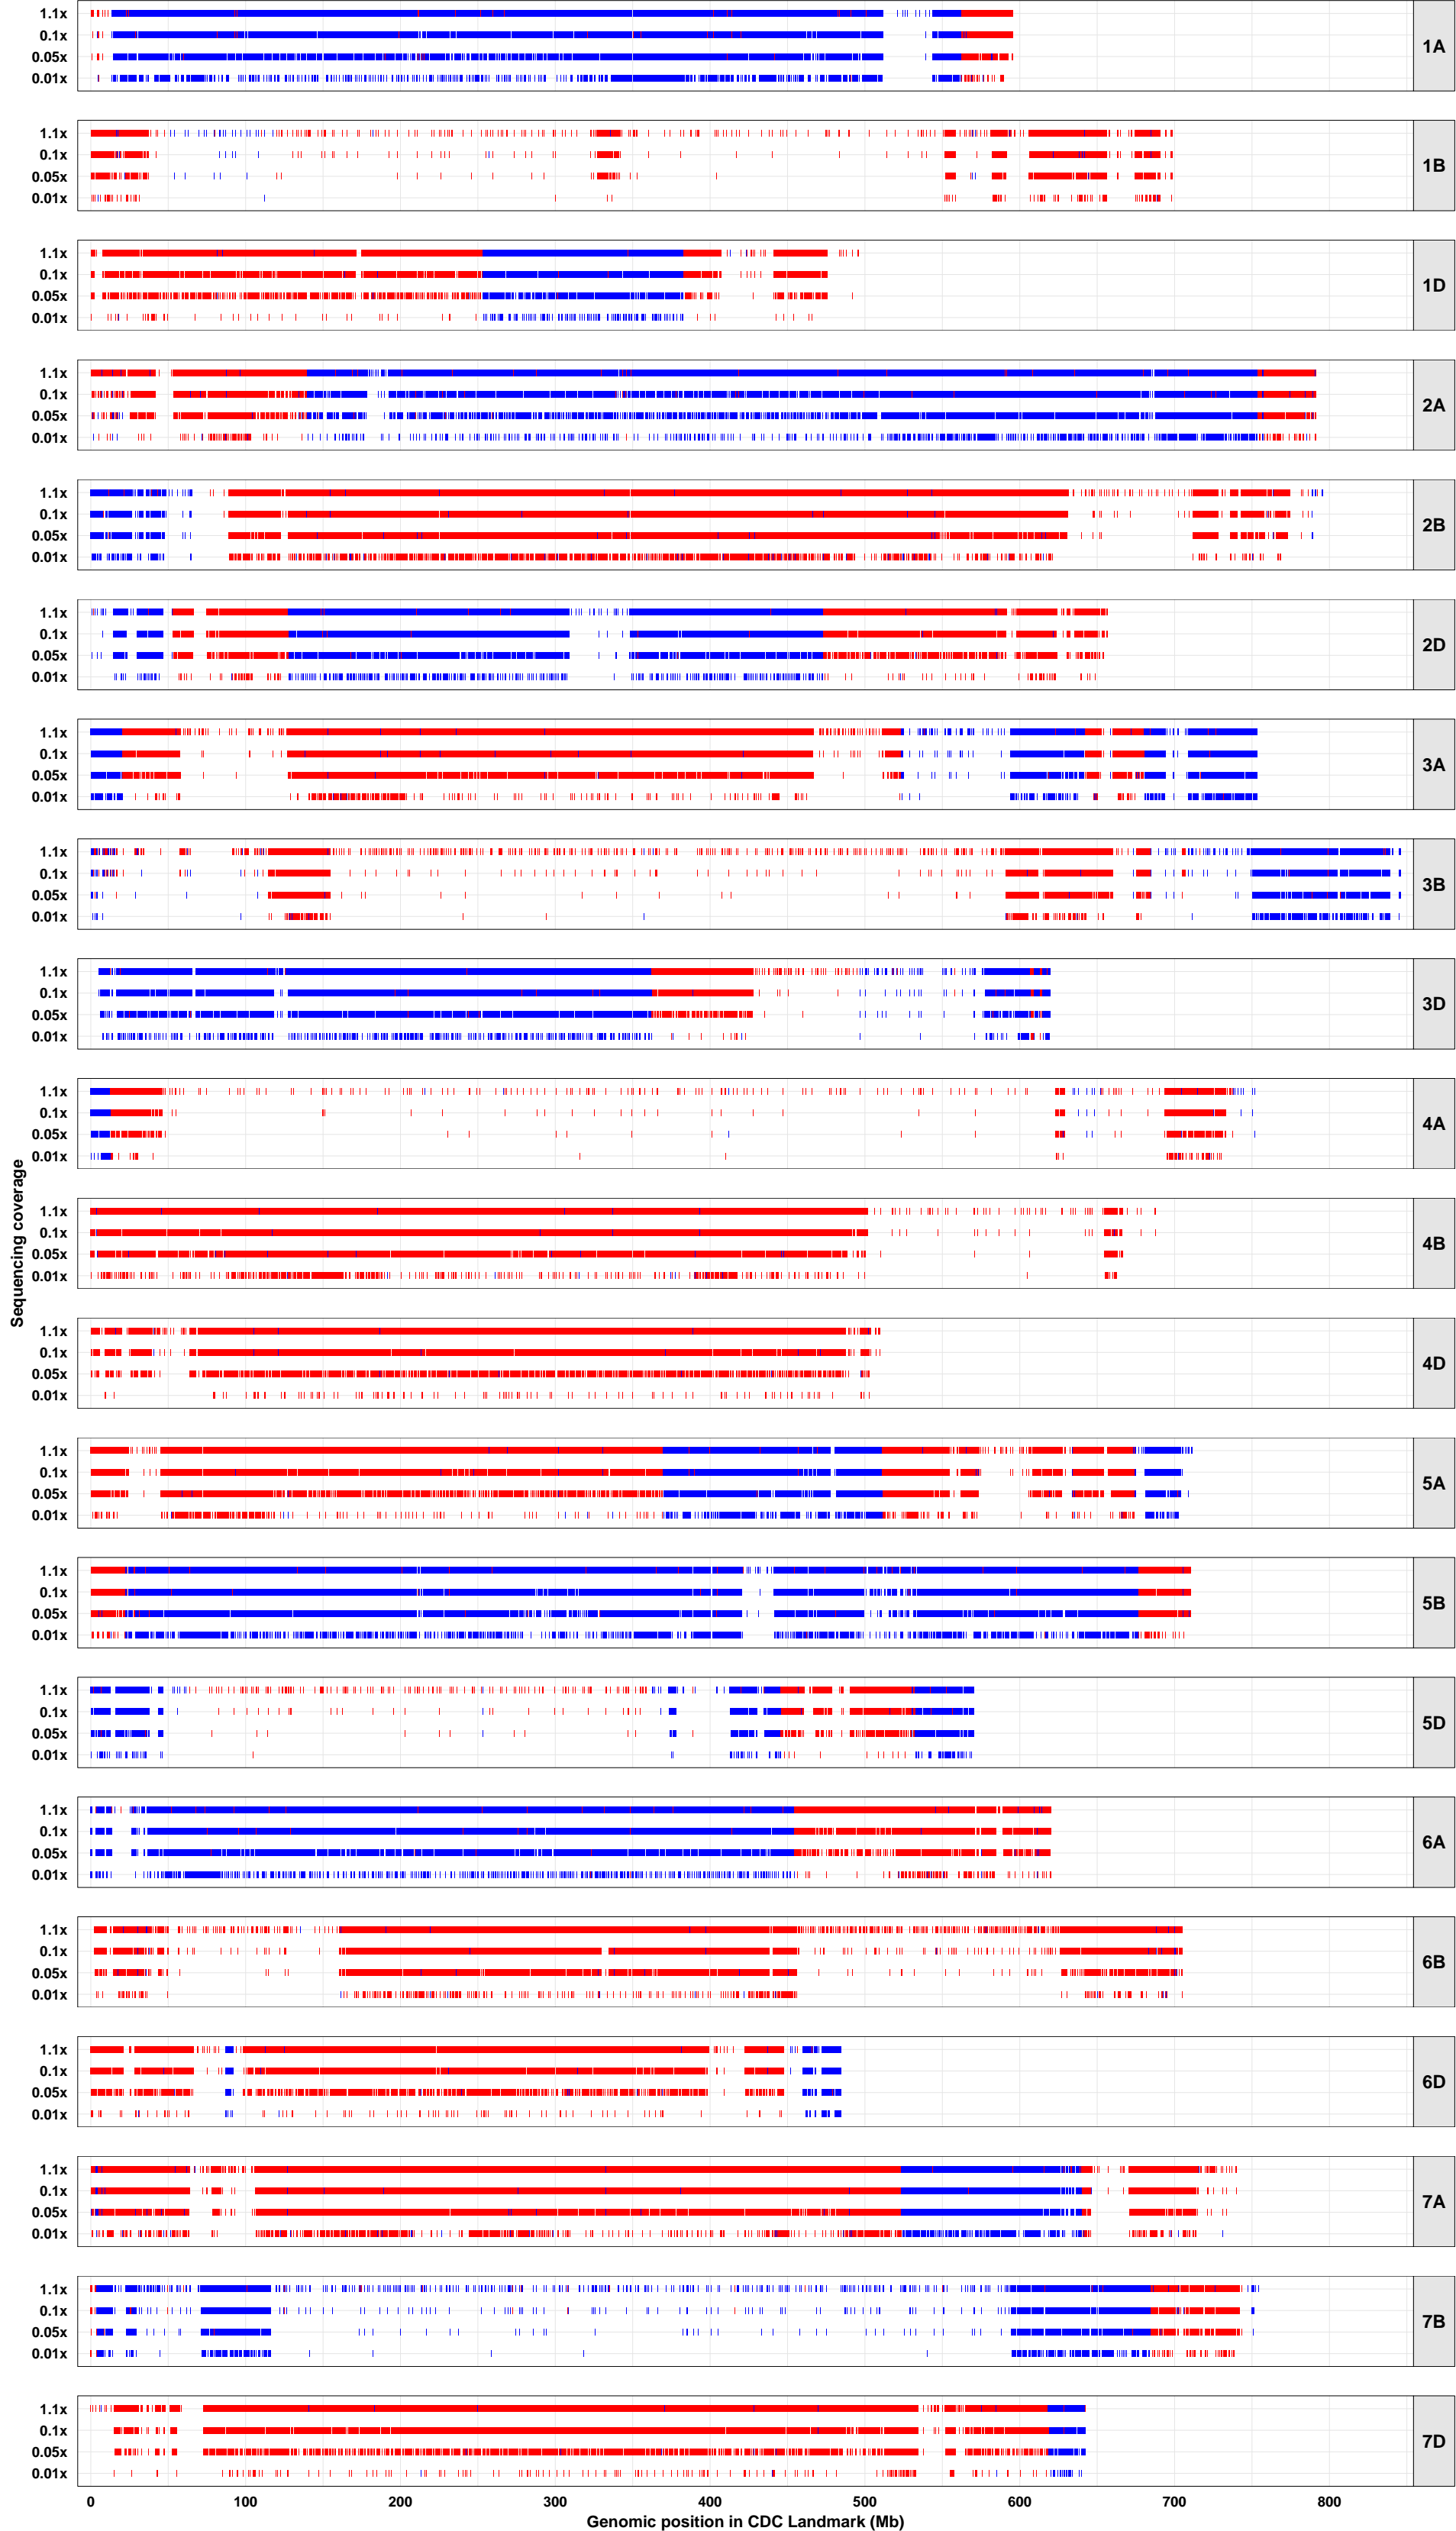

Supplement: Supplementary file 16 [file StanleyLandmarkDH01058-0.pdf › Supplementary-Figure-S3_StanleyLandmarkDH/StanleyLandmarkDH01058-0.pdf]

StanleyLandmarkKH01060-0

CDC Landmark CDC Stanley

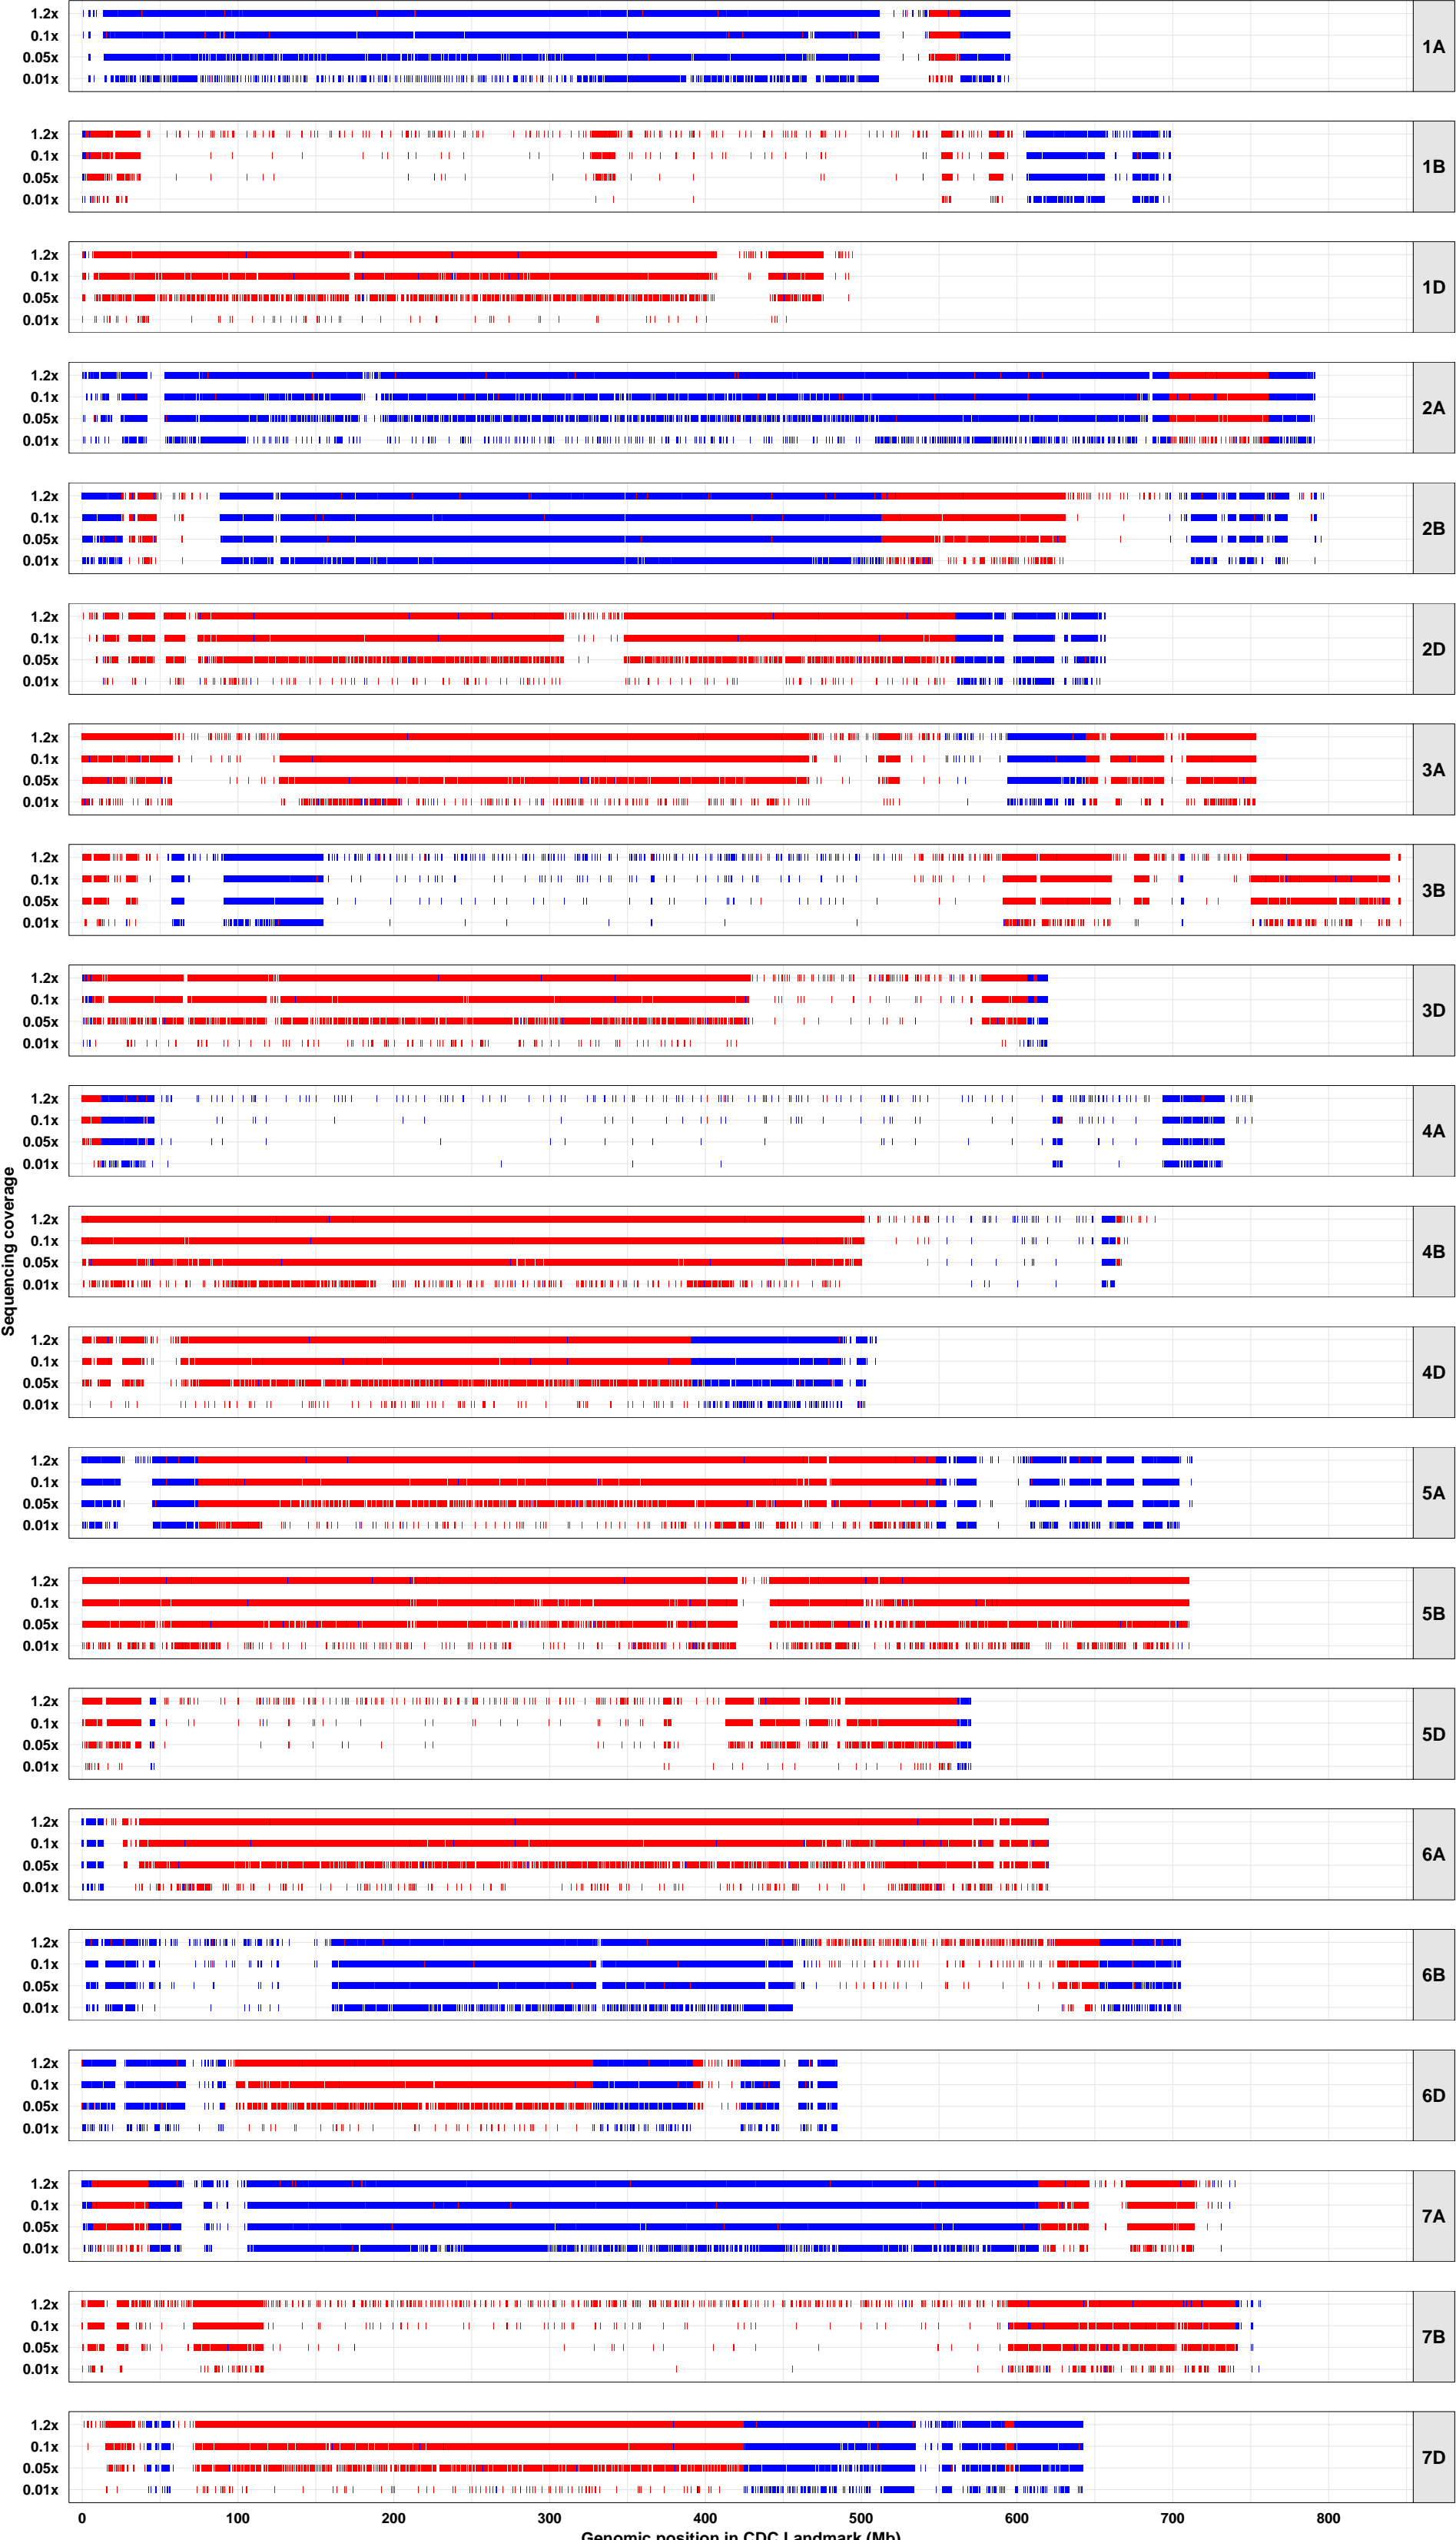

Supplement: Supplementary file 17 [file StanleyLandmarkDH01060-0.pdf › Supplementary-Figure-S3_StanleyLandmarkDH/StanleyLandmarkDH01060-0.pdf]

StanleyLandmarkDH01061-0

CDC Landmark CDC Stanley

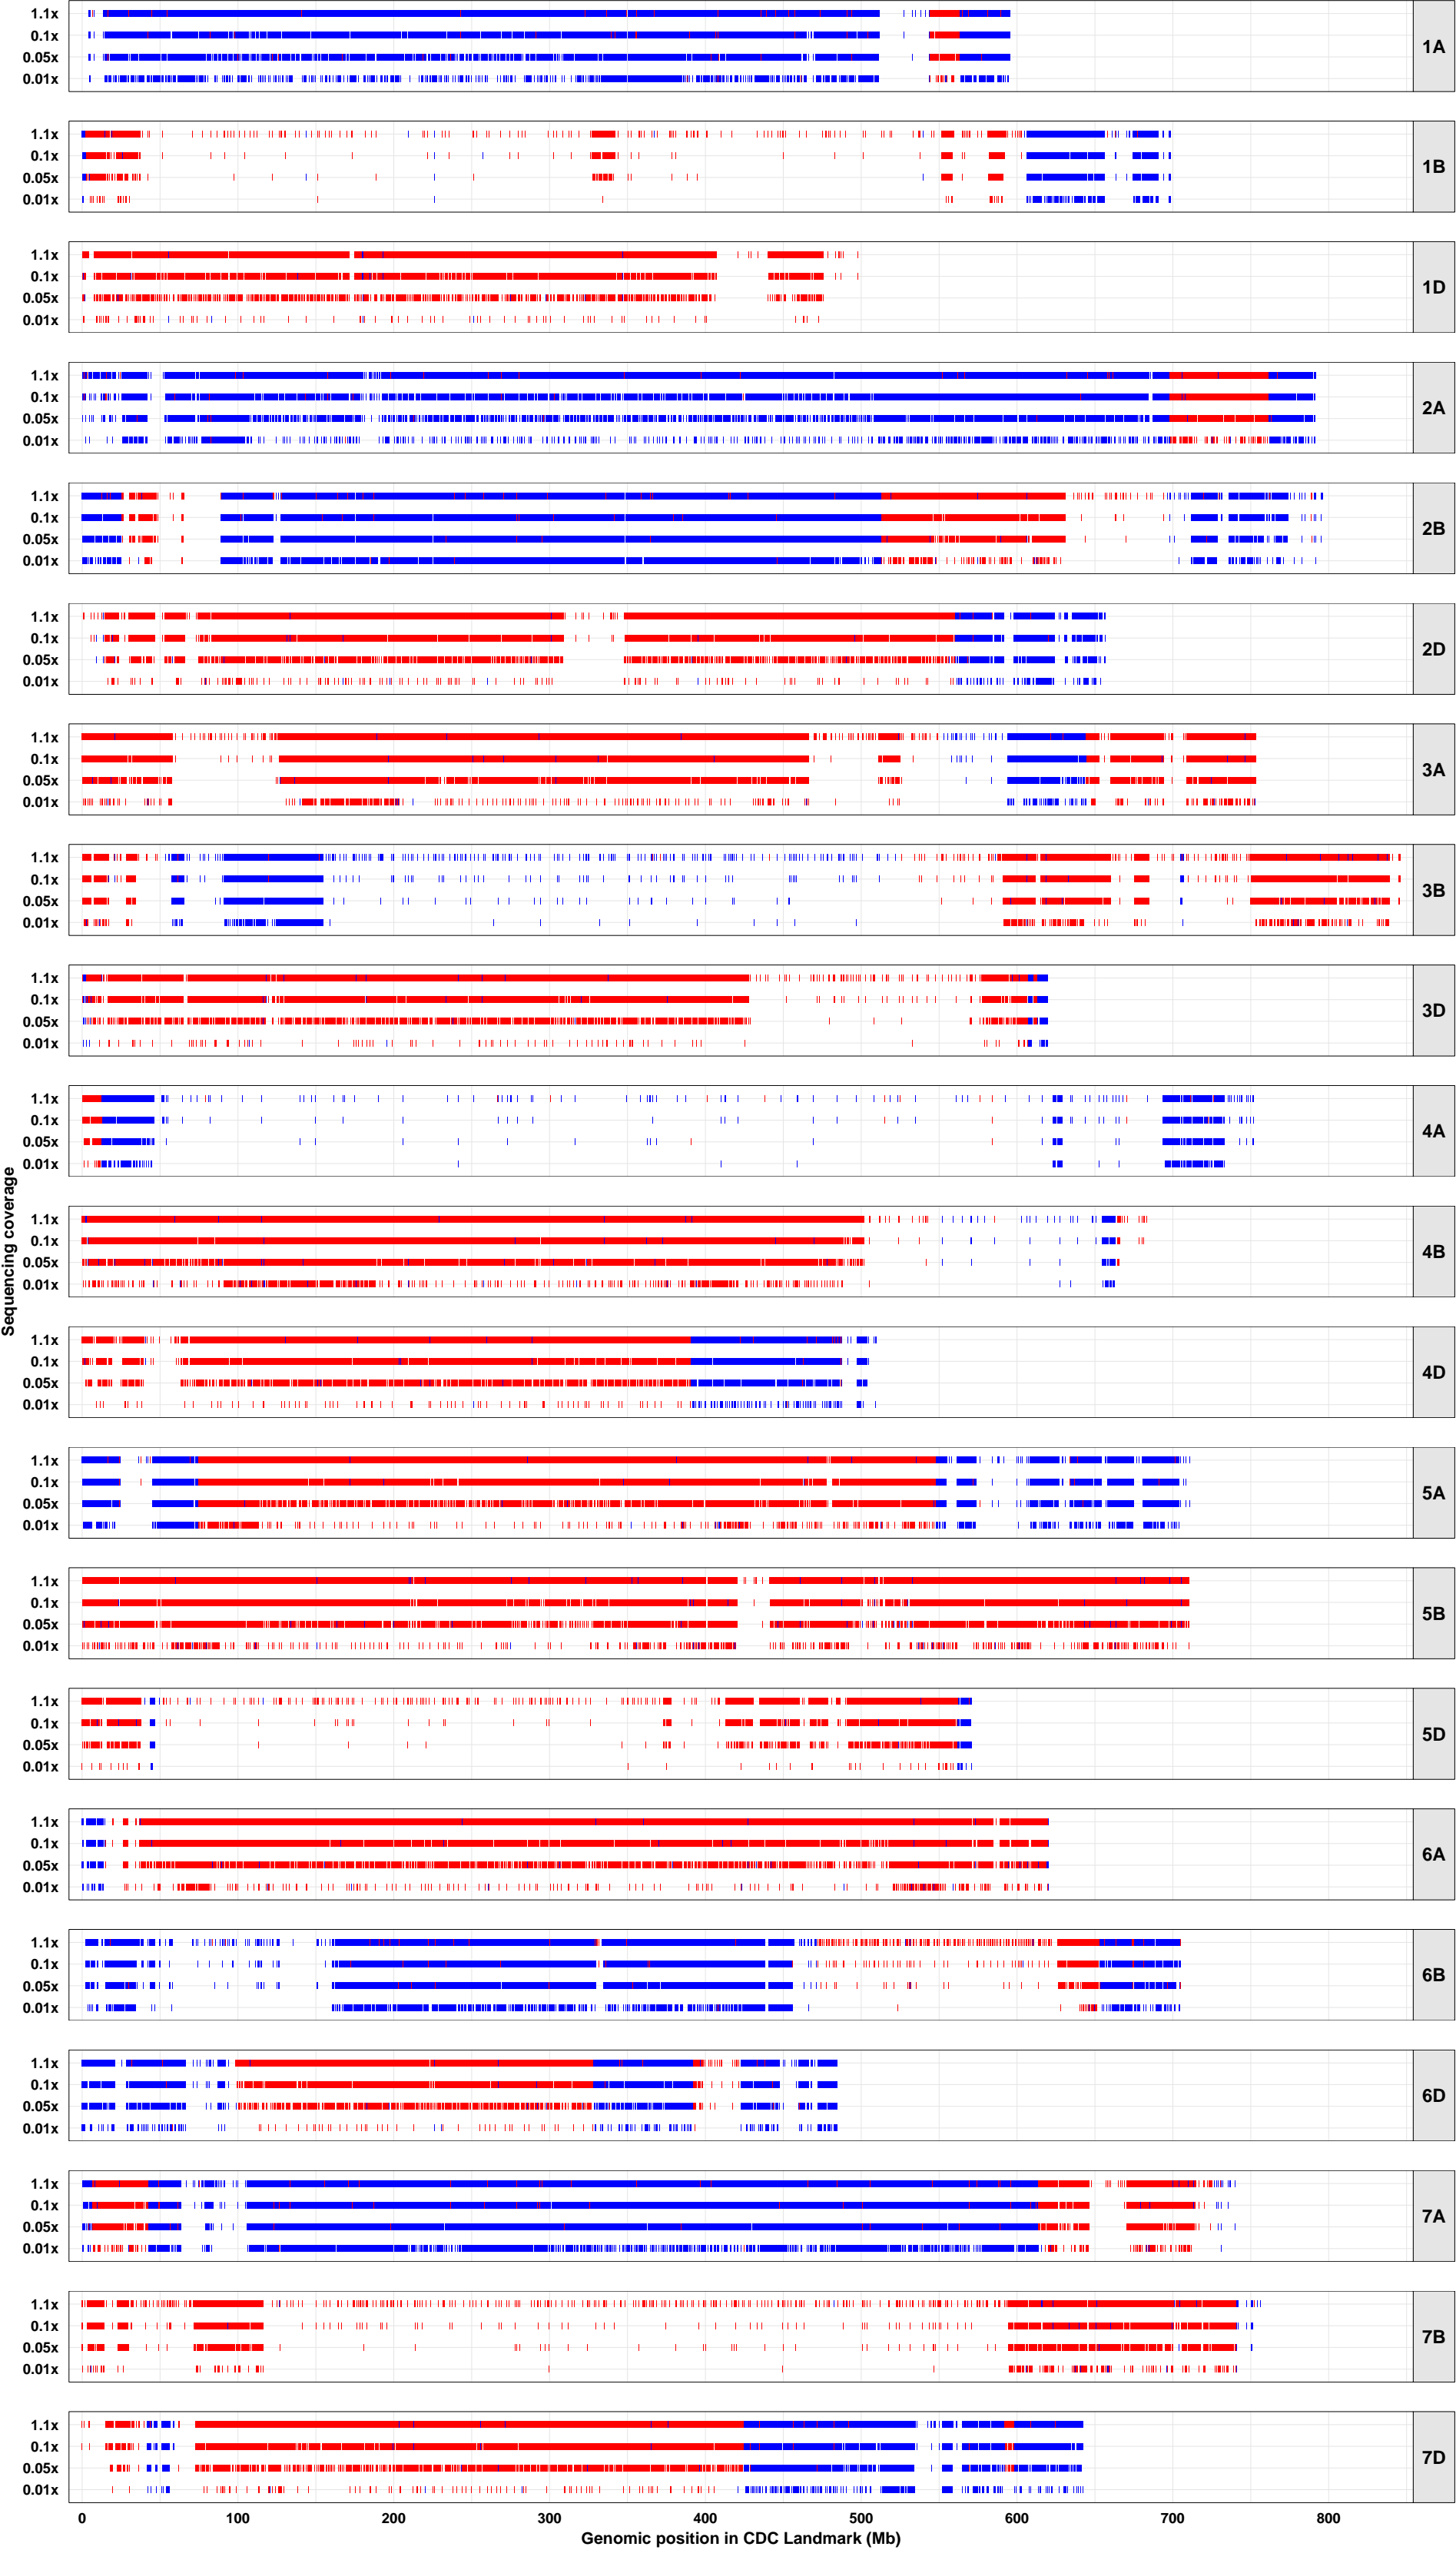

Supplement: Supplementary file 18 [file StanleyLandmarkDH01061-0.pdf › Supplementary-Figure-S3_StanleyLandmarkDH/StanleyLandmarkDH01061-0.pdf]

StanleyLandmarkDH01062-0

CDC Landmark CDC Stanley

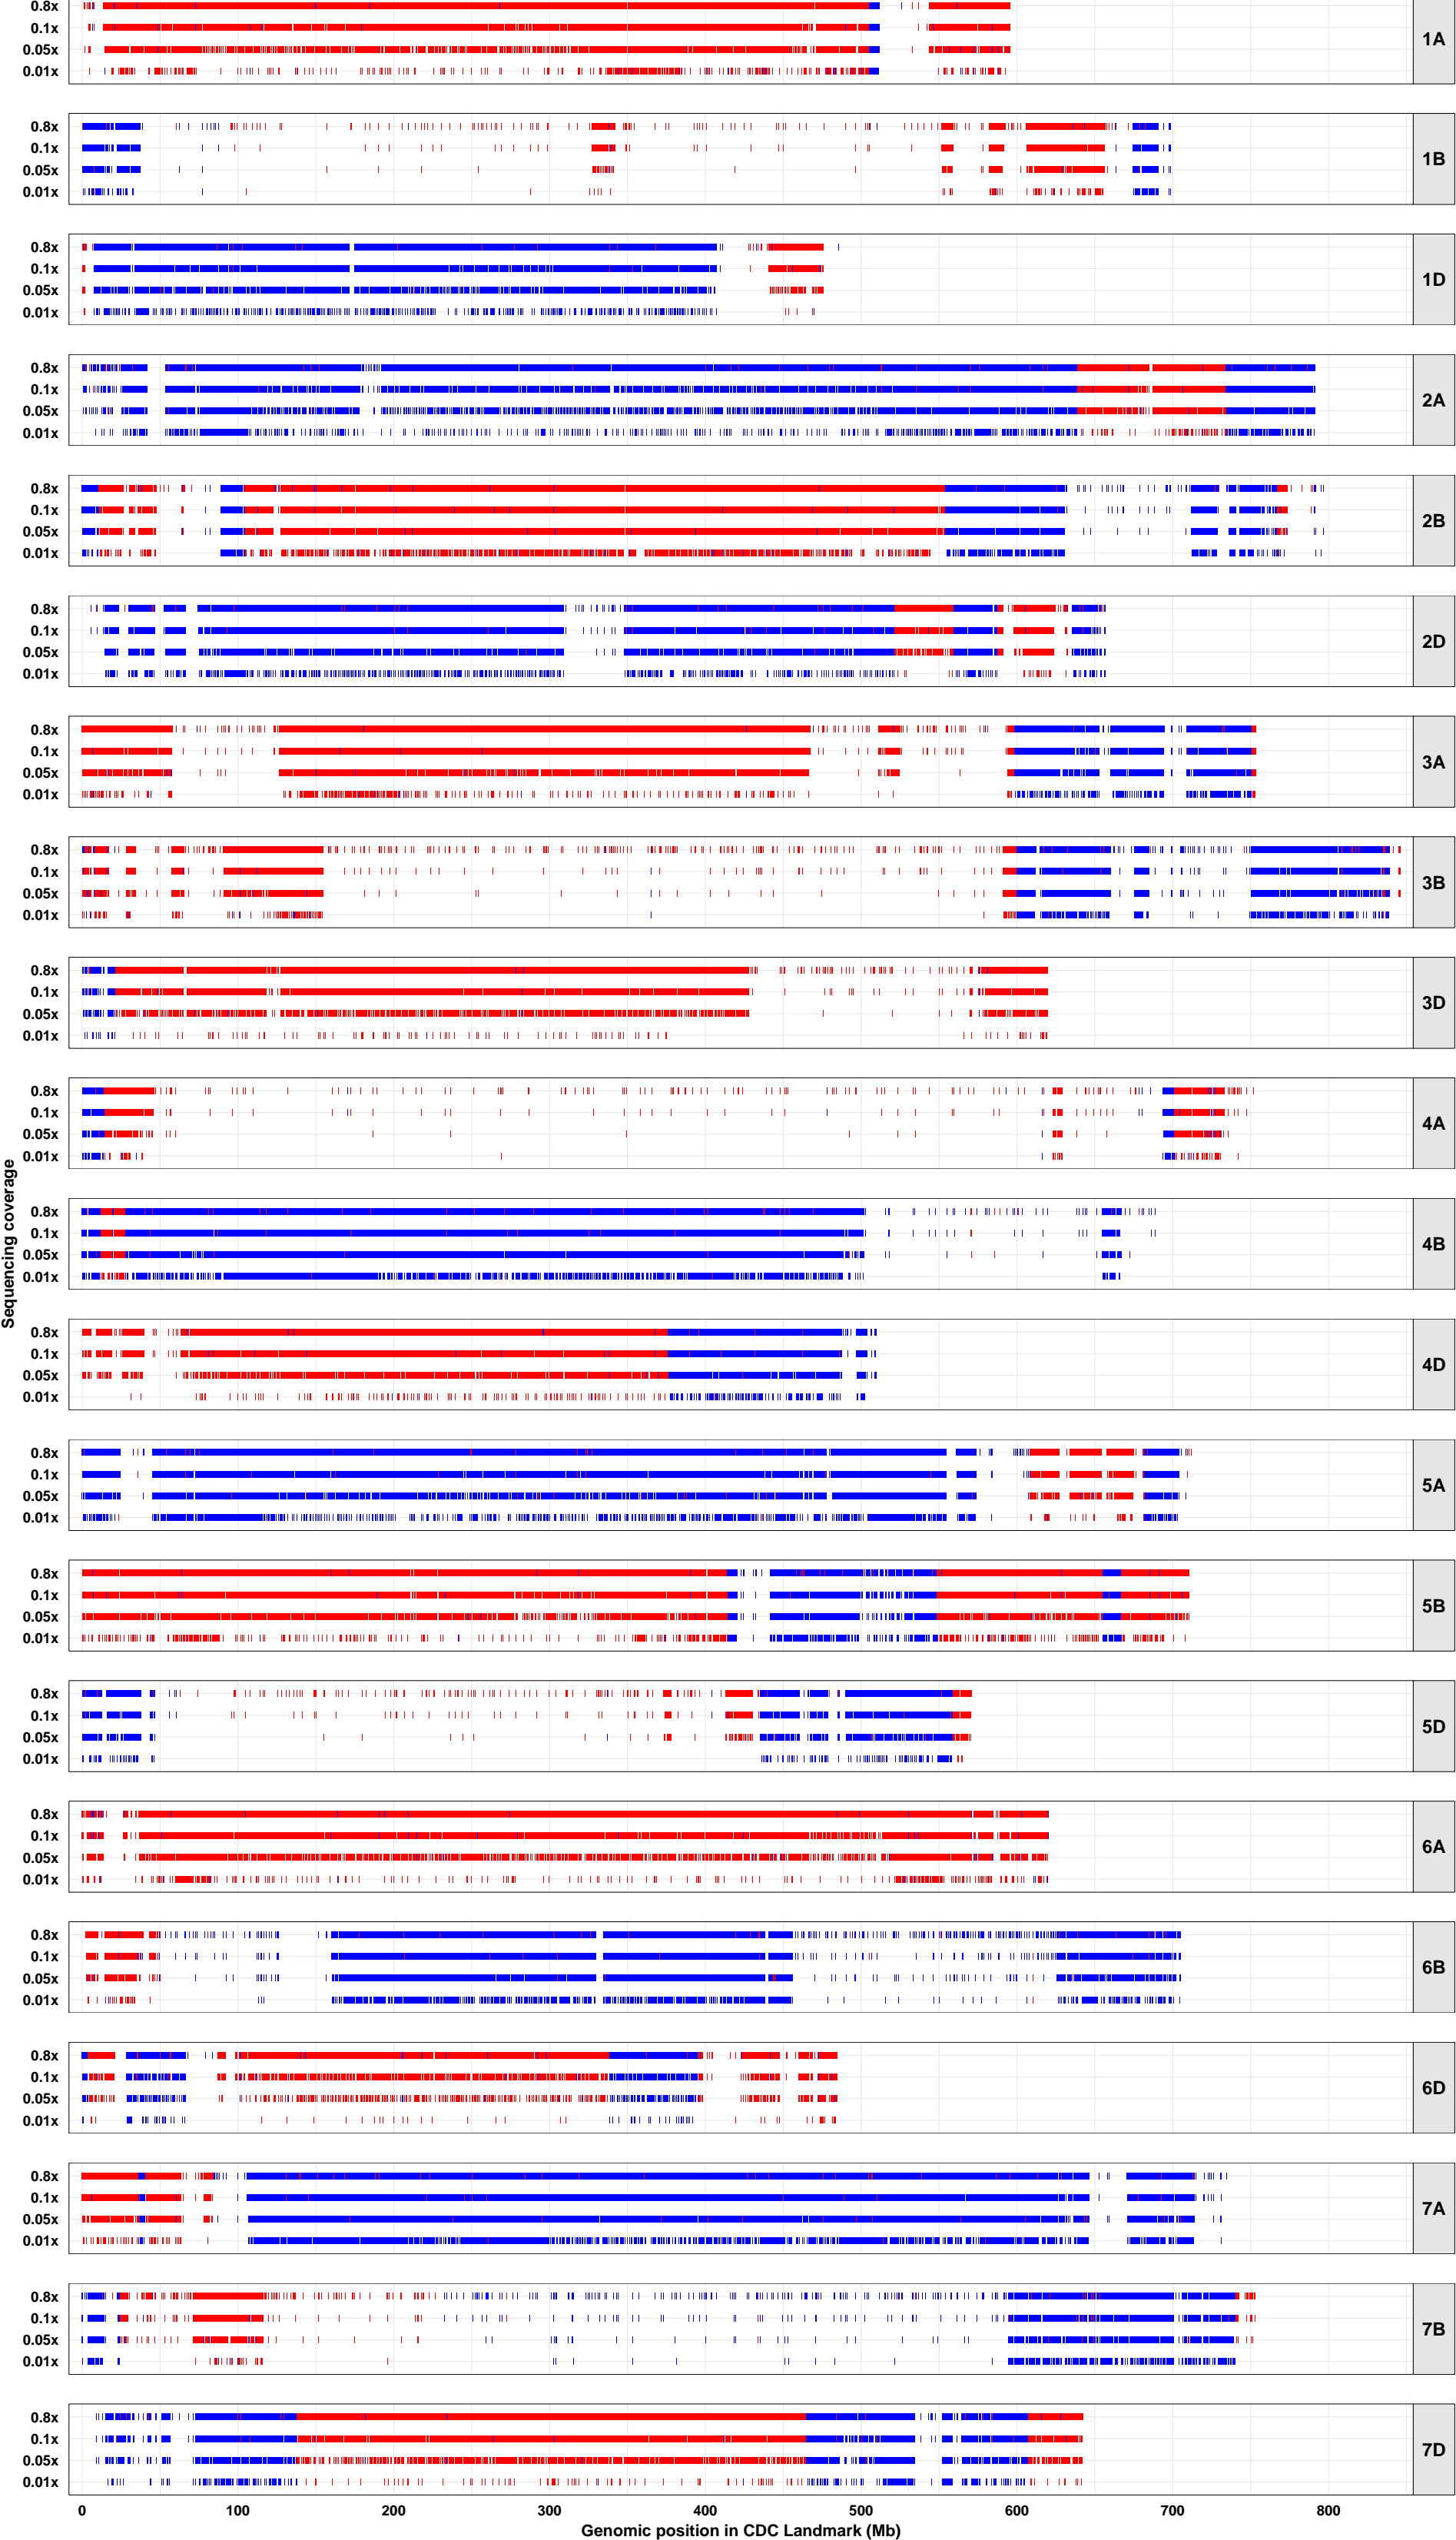

Supplement: Supplementary file 19 [file StanleyLandmarkDH01062-0.pdf › Supplementary-Figure-S3_StanleyLandmarkDH/StanleyLandmarkDH01062-0.pdf]

StanleyLandmarkDH01063-0

CDC Landmark CDC Stanley

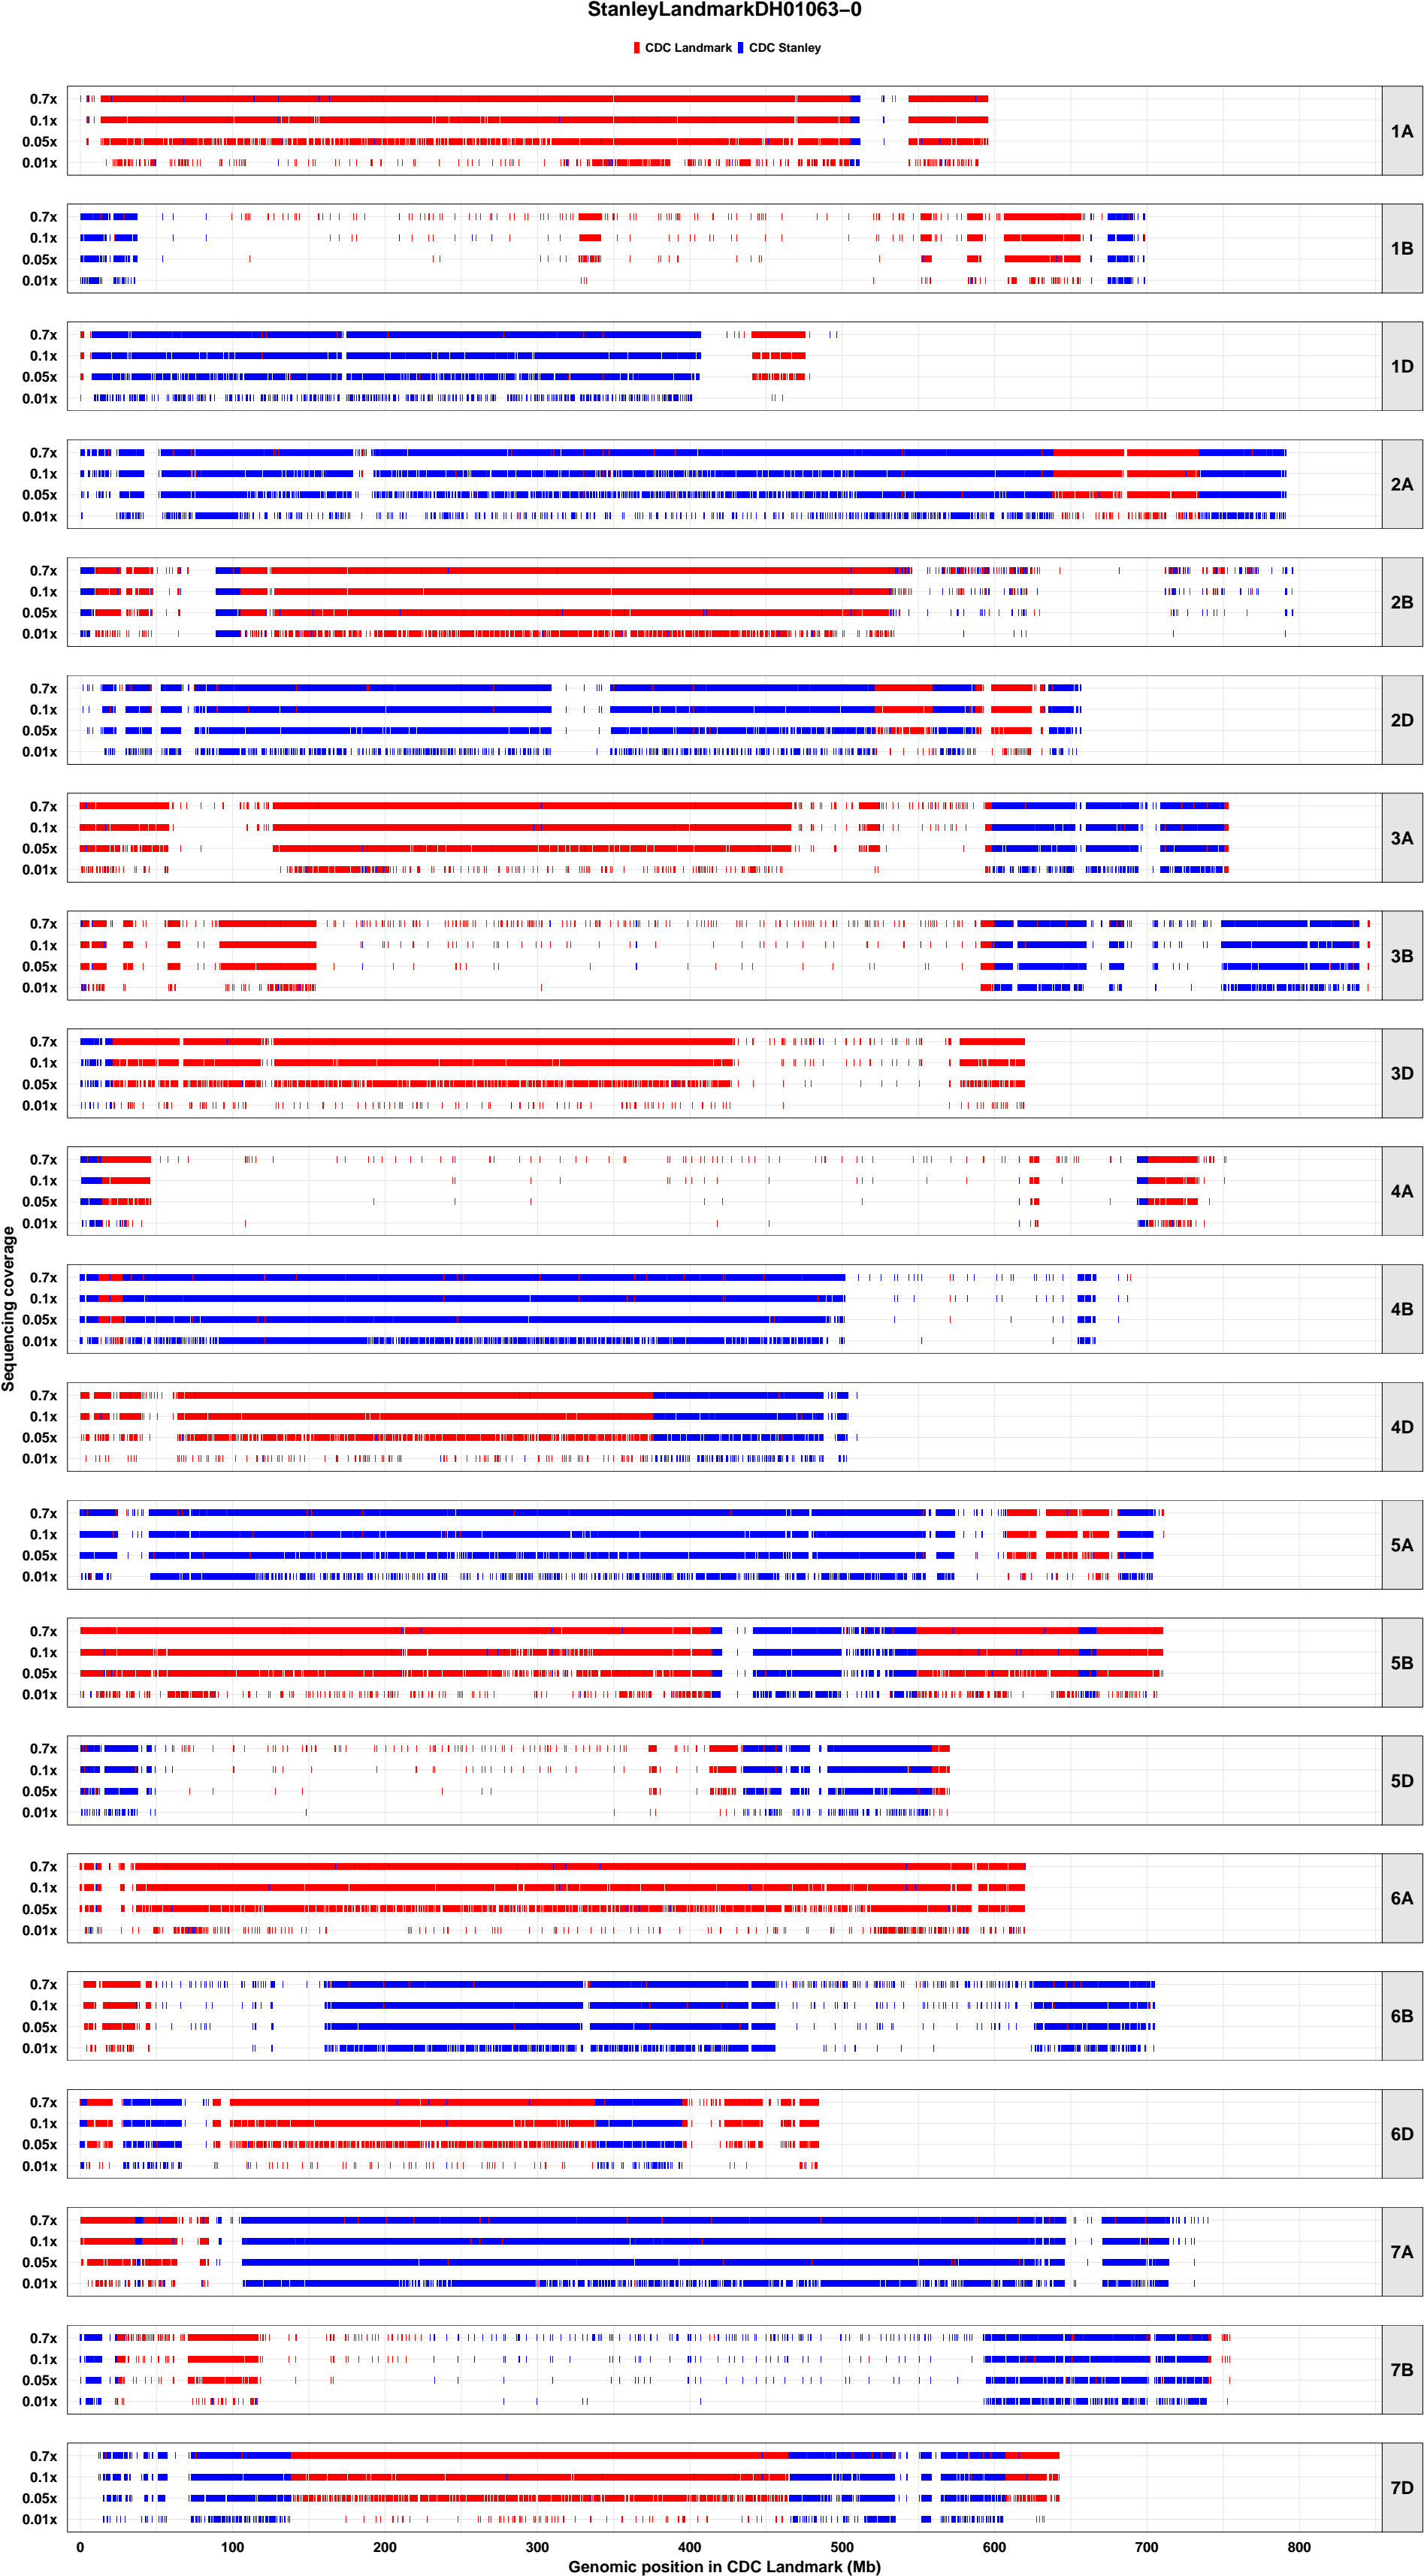

Supplement: Supplementary file 20 [file StanleyLandmarkDH01063-0.pdf › Supplementary-Figure-S3_StanleyLandmarkDH/StanleyLandmarkDH01063-0.pdf]

StanleyLandmarkKDH01064-0

CDC Landmark CDC Stanley

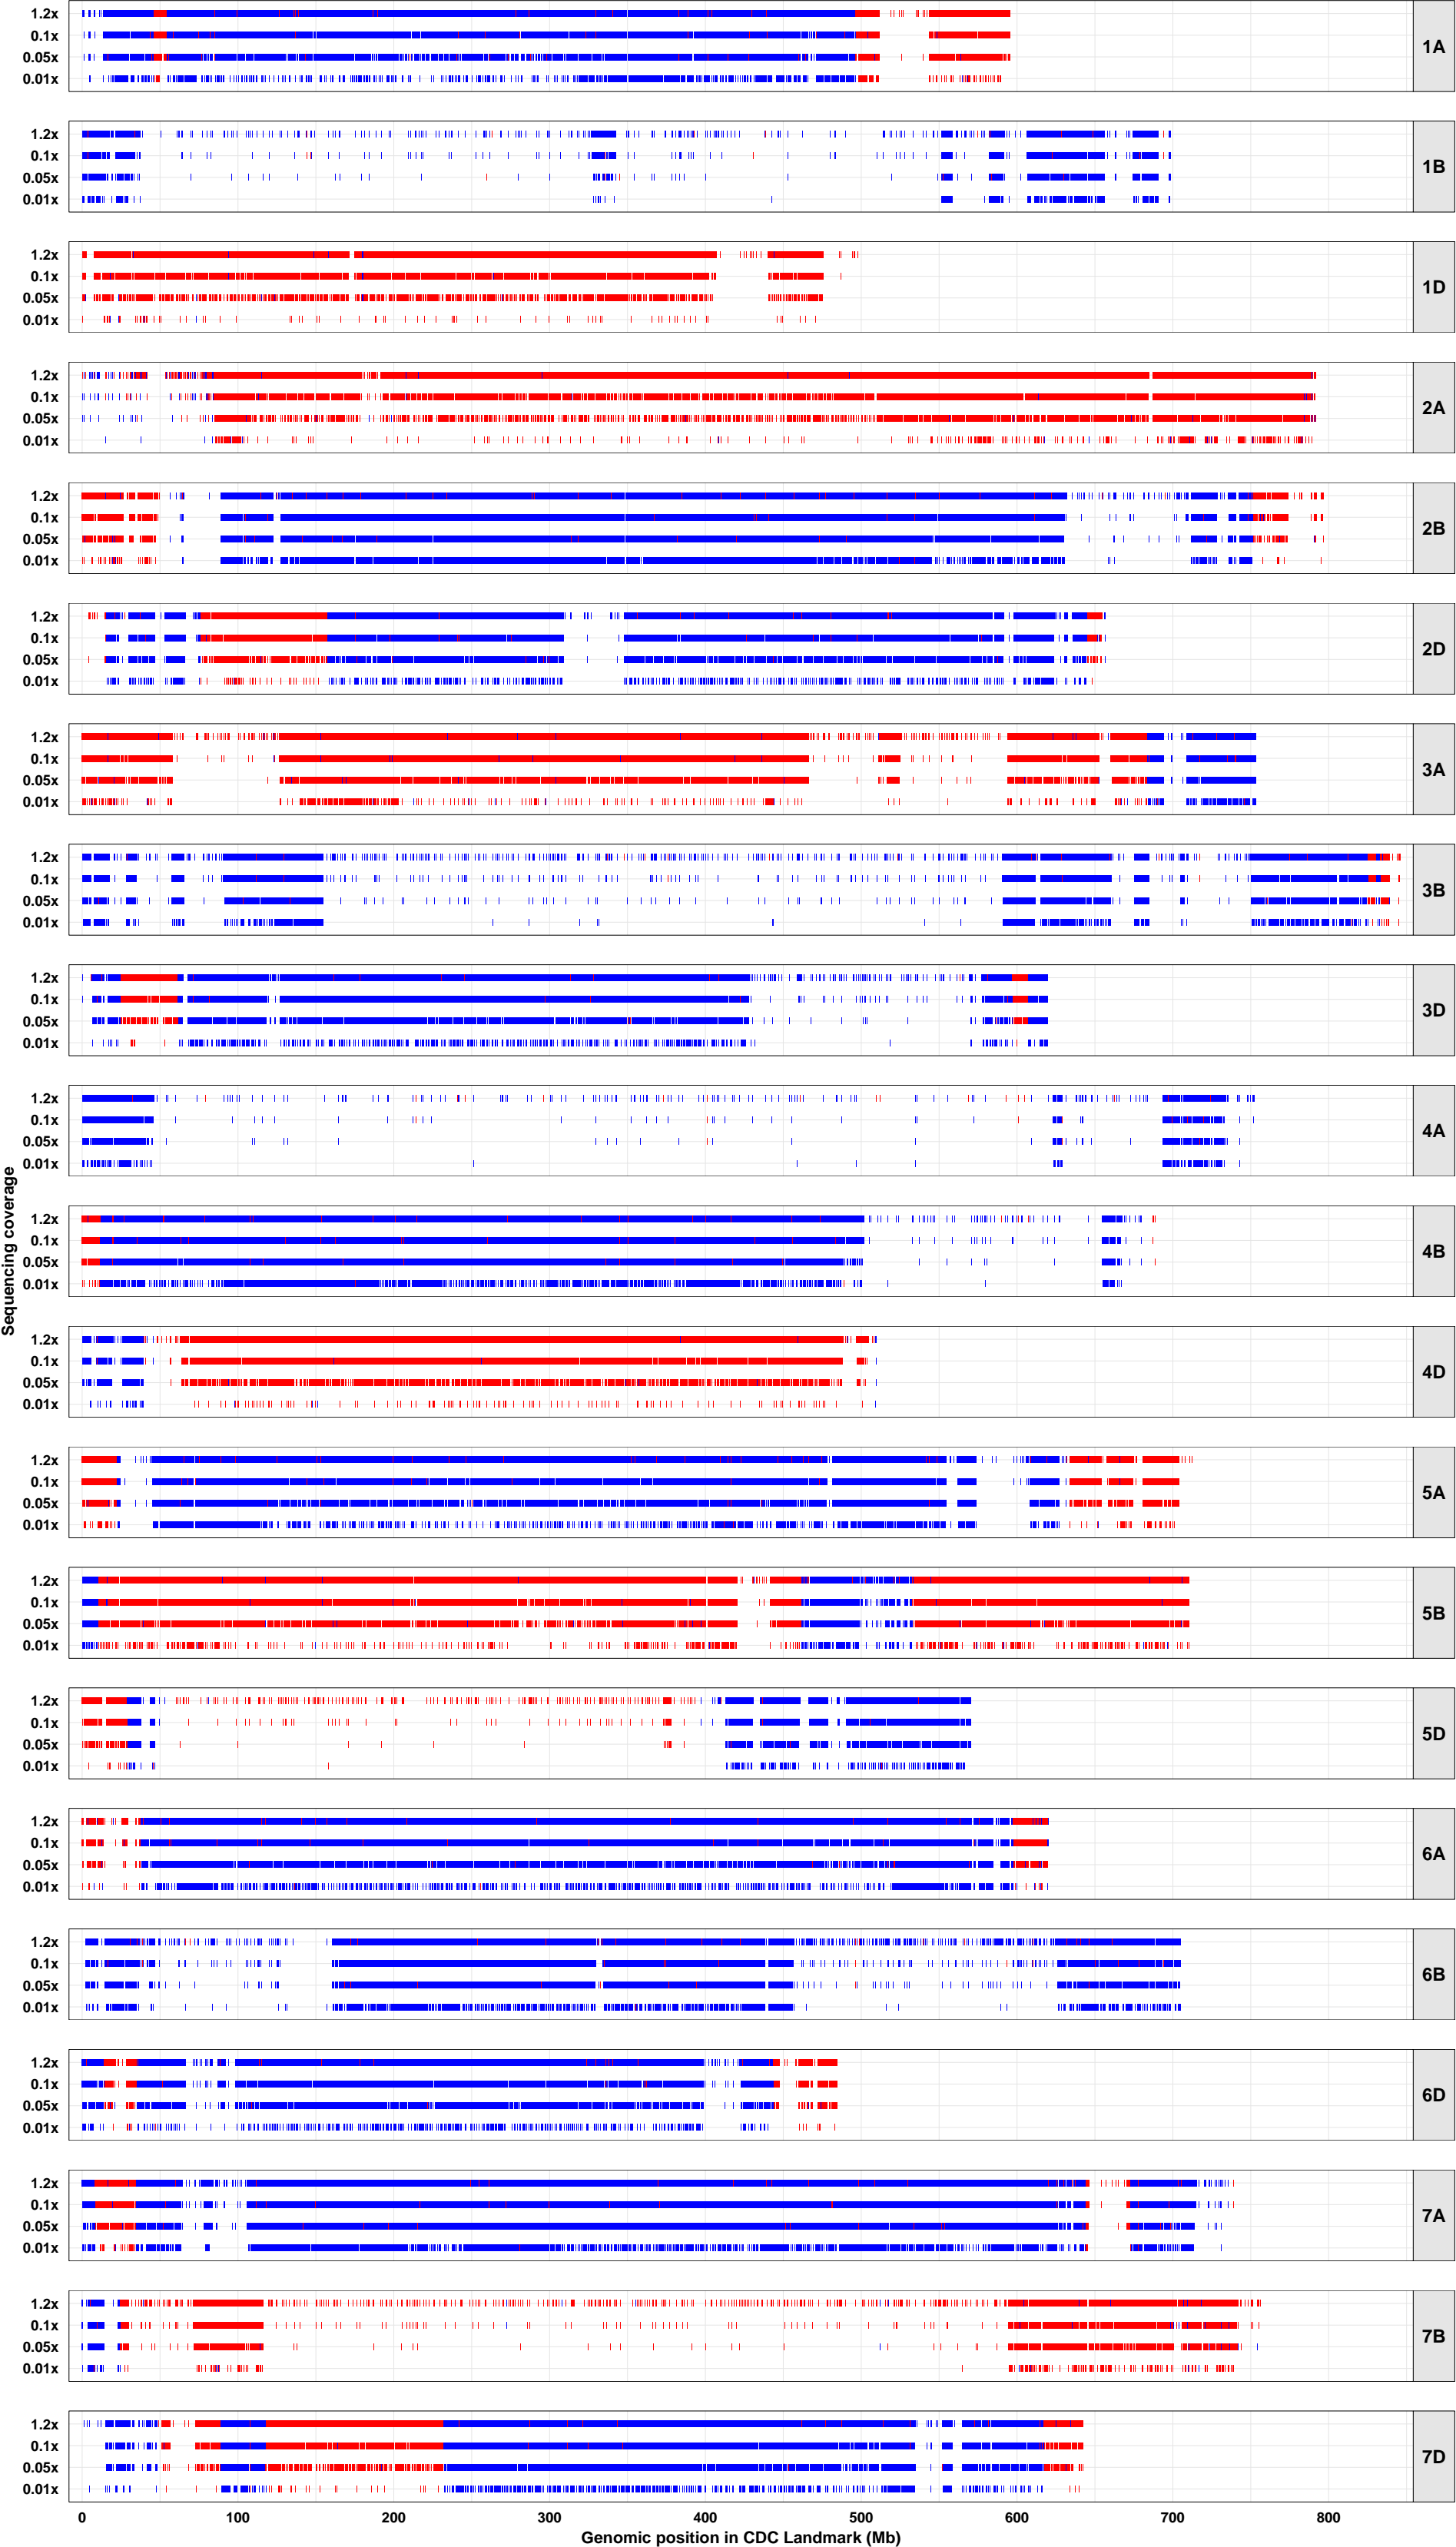

Supplement: Supplementary file 21 [file StanleyLandmarkDH01064-0.pdf › Supplementary-Figure-S3_StanleyLandmarkDH/StanleyLandmarkDH01064-0.pdf]

StanleyLandmarkKH01065-0

CDC Landmark CDC Stanley

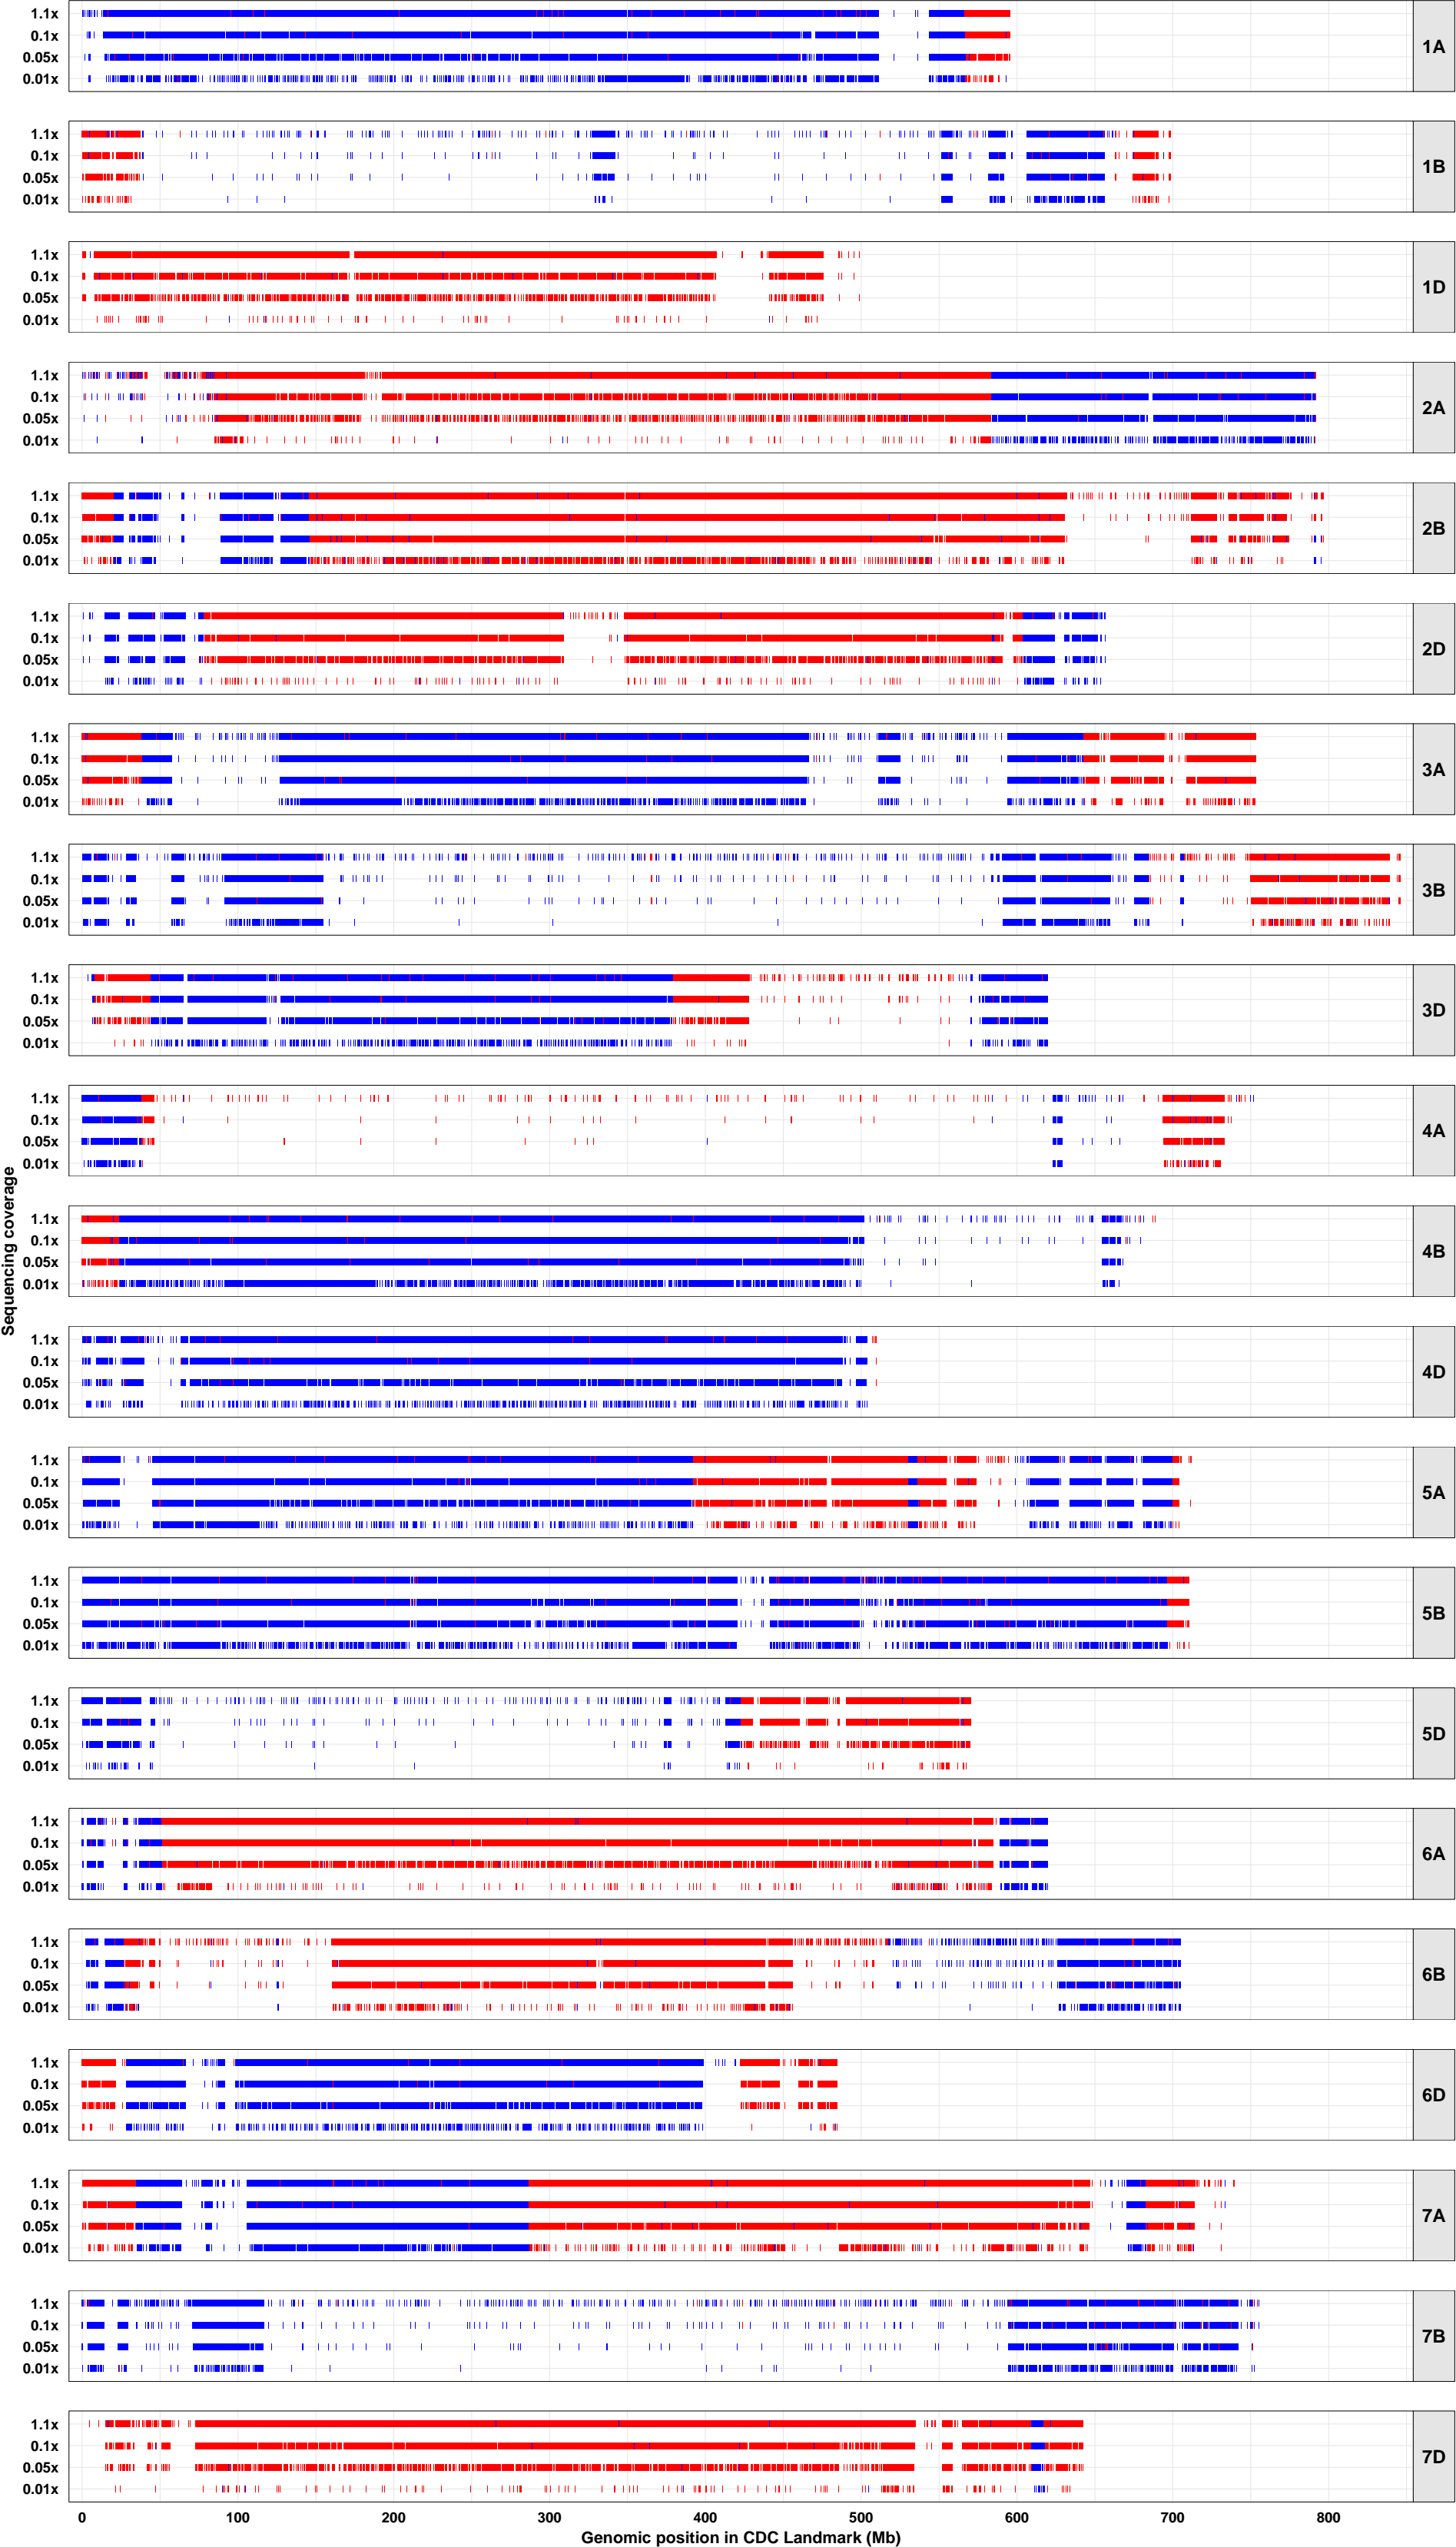

Supplement: Supplementary file 22 [file StanleyLandmarkDH01065-0.pdf › Supplementary-Figure-S3_StanleyLandmarkDH/StanleyLandmarkDH01065-0.pdf]

StanleyLandmarkDH01067-0

CDC Landmark CDC Stanley

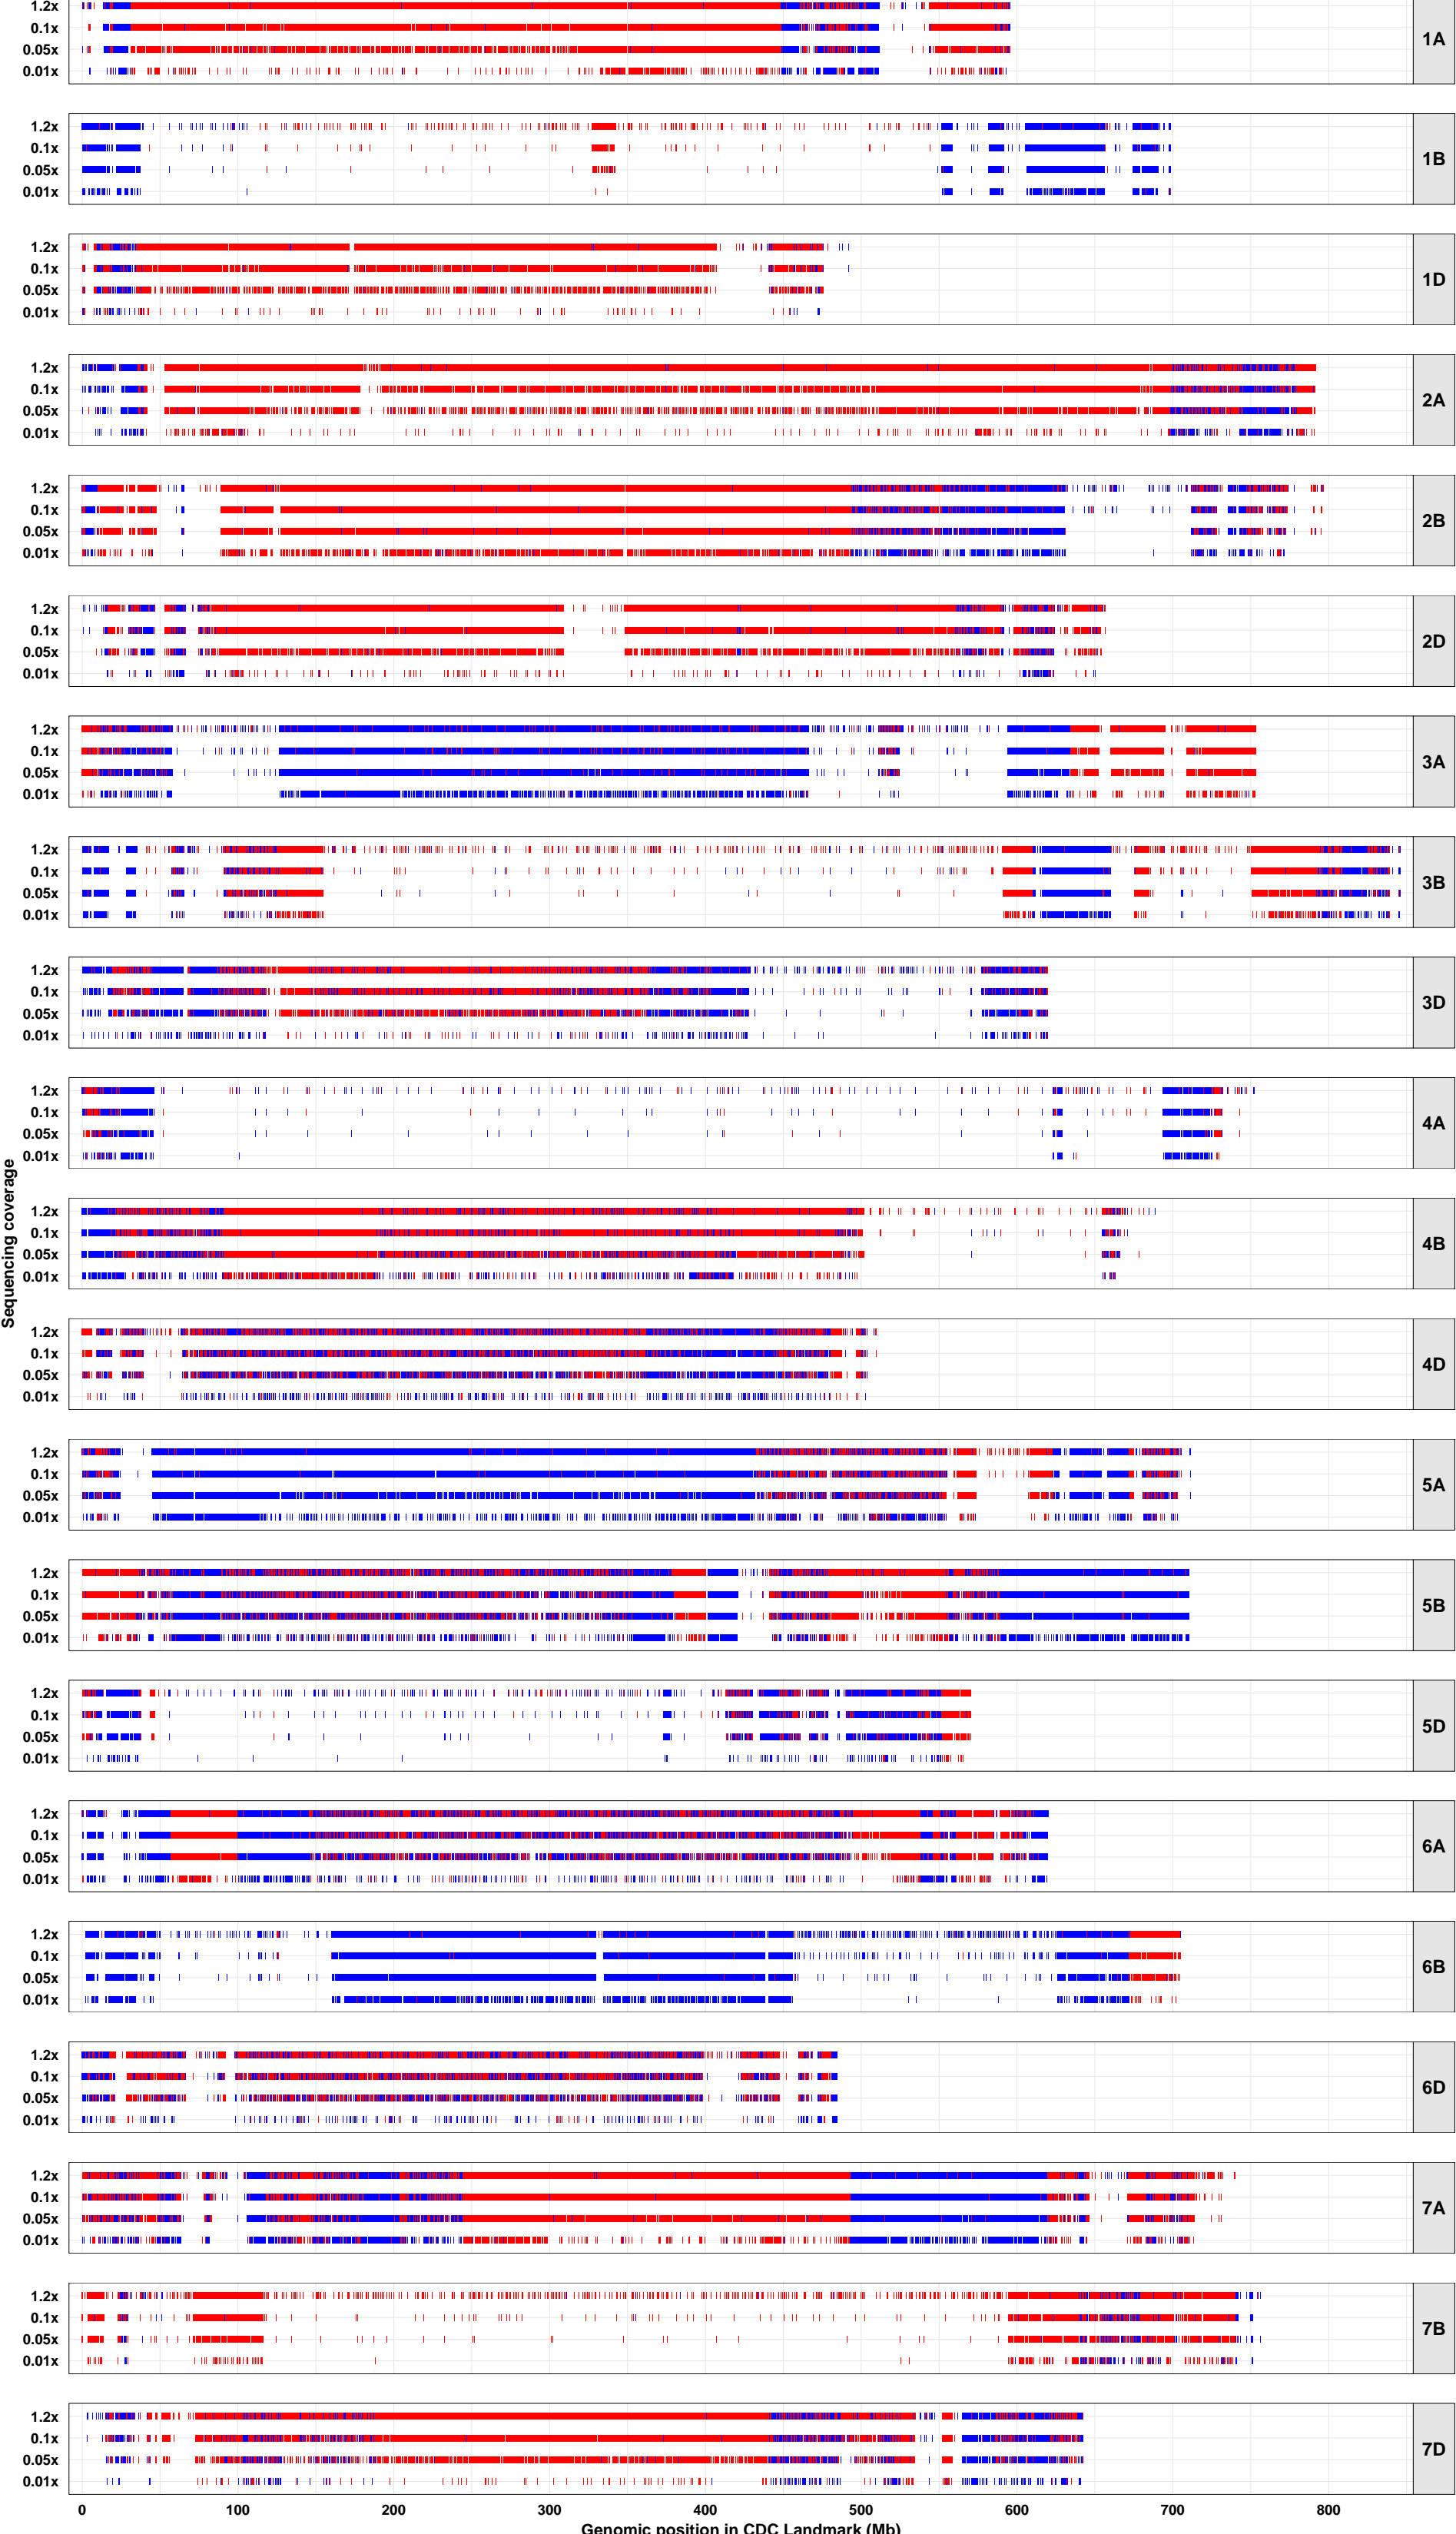

Supplement: Supplementary file 23 [file StanleyLandmarkDH01067-0.pdf › Supplementary-Figure-S3_StanleyLandmarkDH/StanleyLandmarkDH01067-0.pdf]

StanleyLandmarkKDHO1068-0

CDC Landmark CDC Stanley

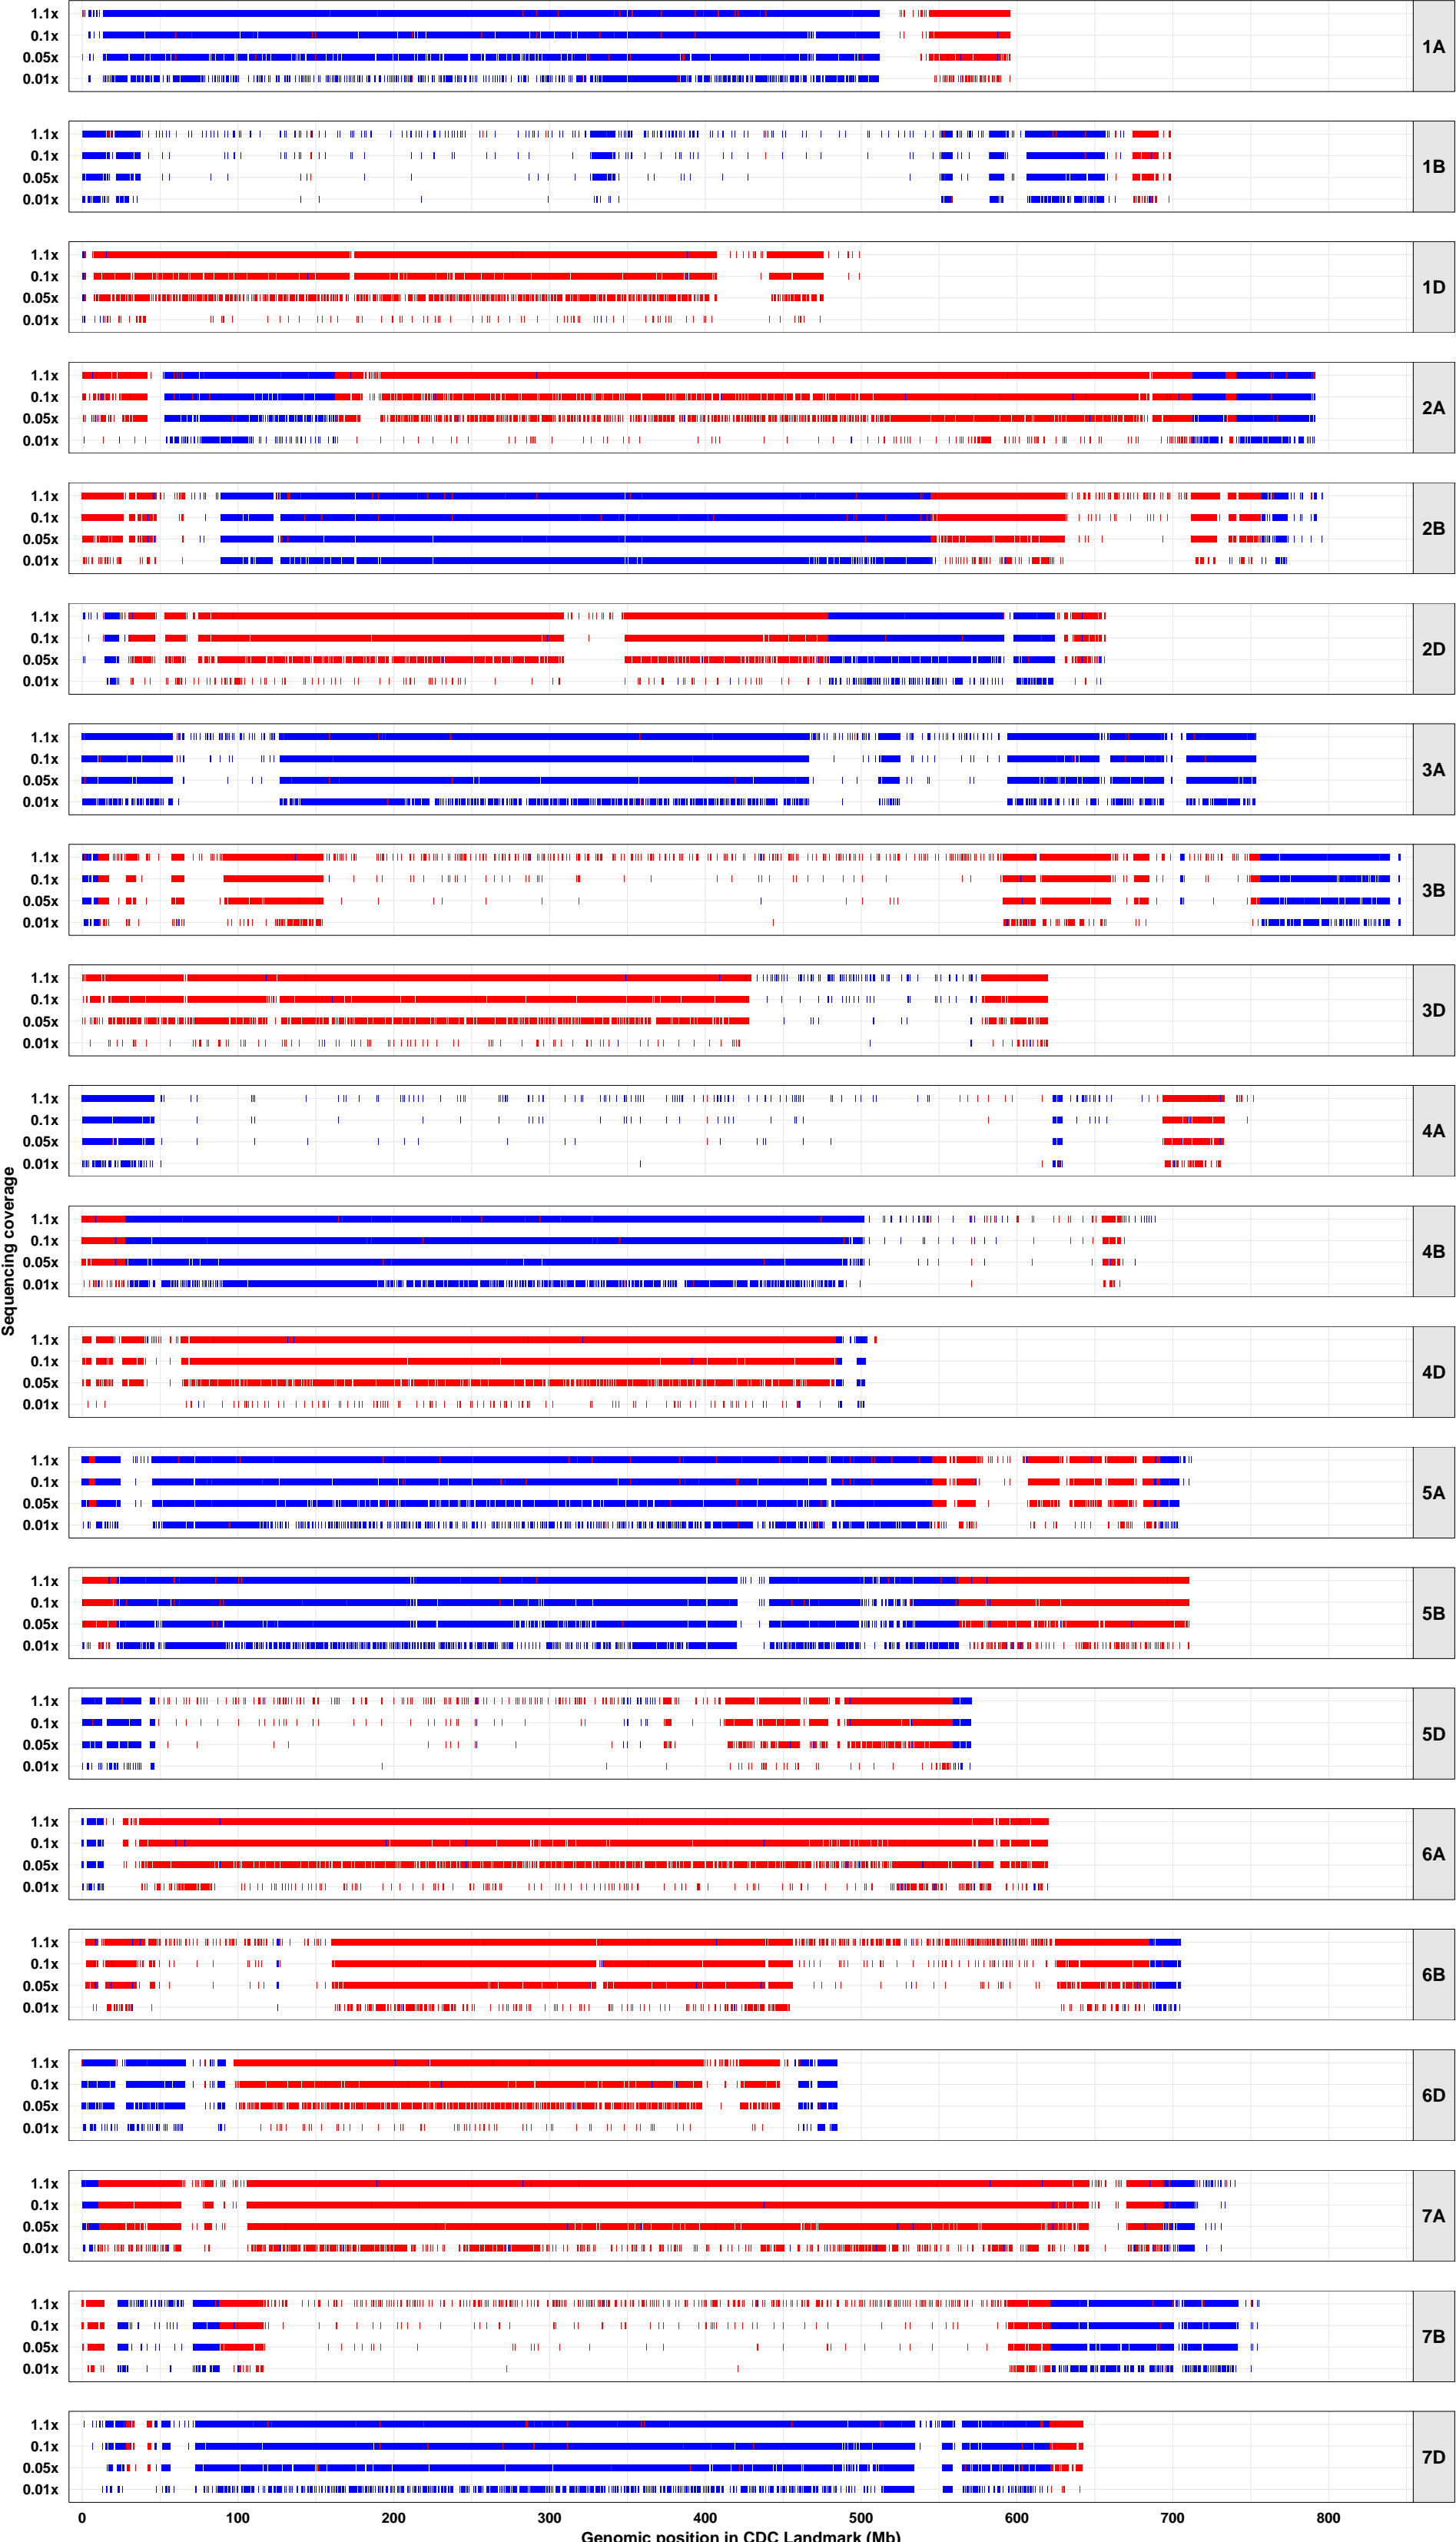

Supplement: Supplementary file 24 [file StanleyLandmarkDH01068-0.pdf › Supplementary-Figure-S3_StanleyLandmarkDH/StanleyLandmarkDH01068-0.pdf]

StanleyLandmarkKDHO1069-0

CDC Landmark CDC Stanley

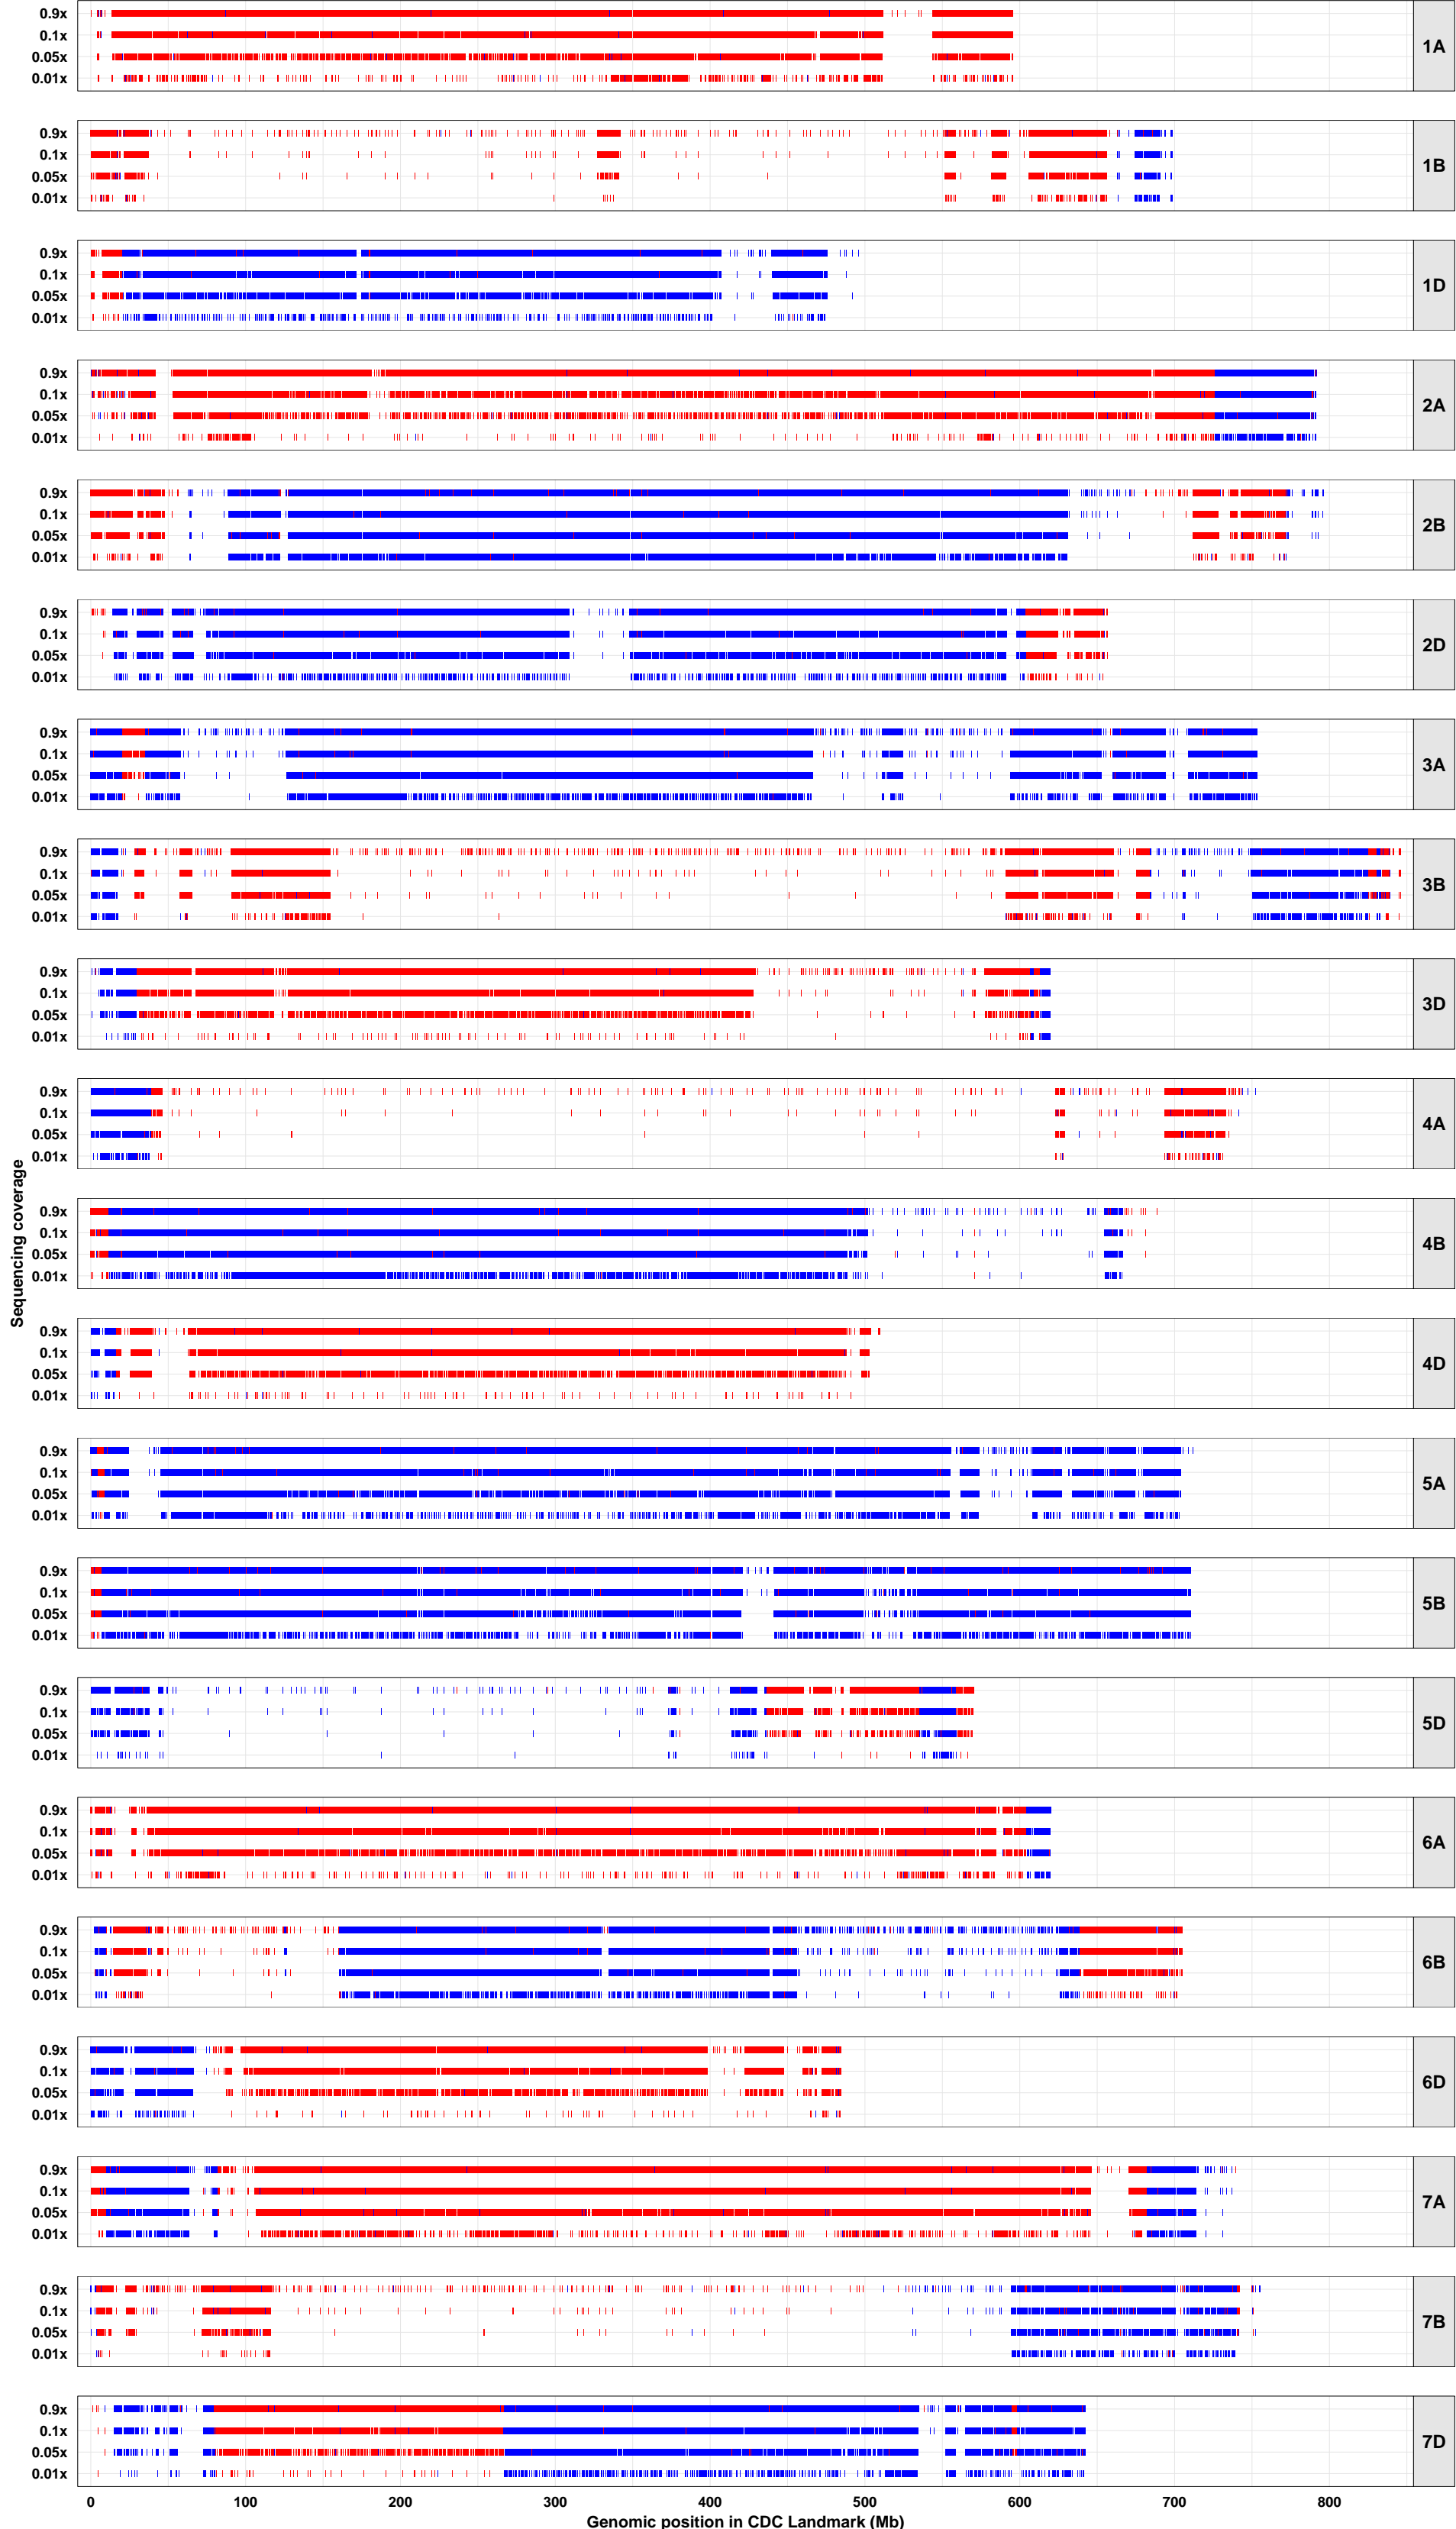

Supplement: Supplementary file 25 [file StanleyLandmarkDH01069-0.pdf › Supplementary-Figure-S3_StanleyLandmarkDH/StanleyLandmarkDH01069-0.pdf]

StanleyLandmarkKDHO1070-0

CDC Landmark CDC Stanley

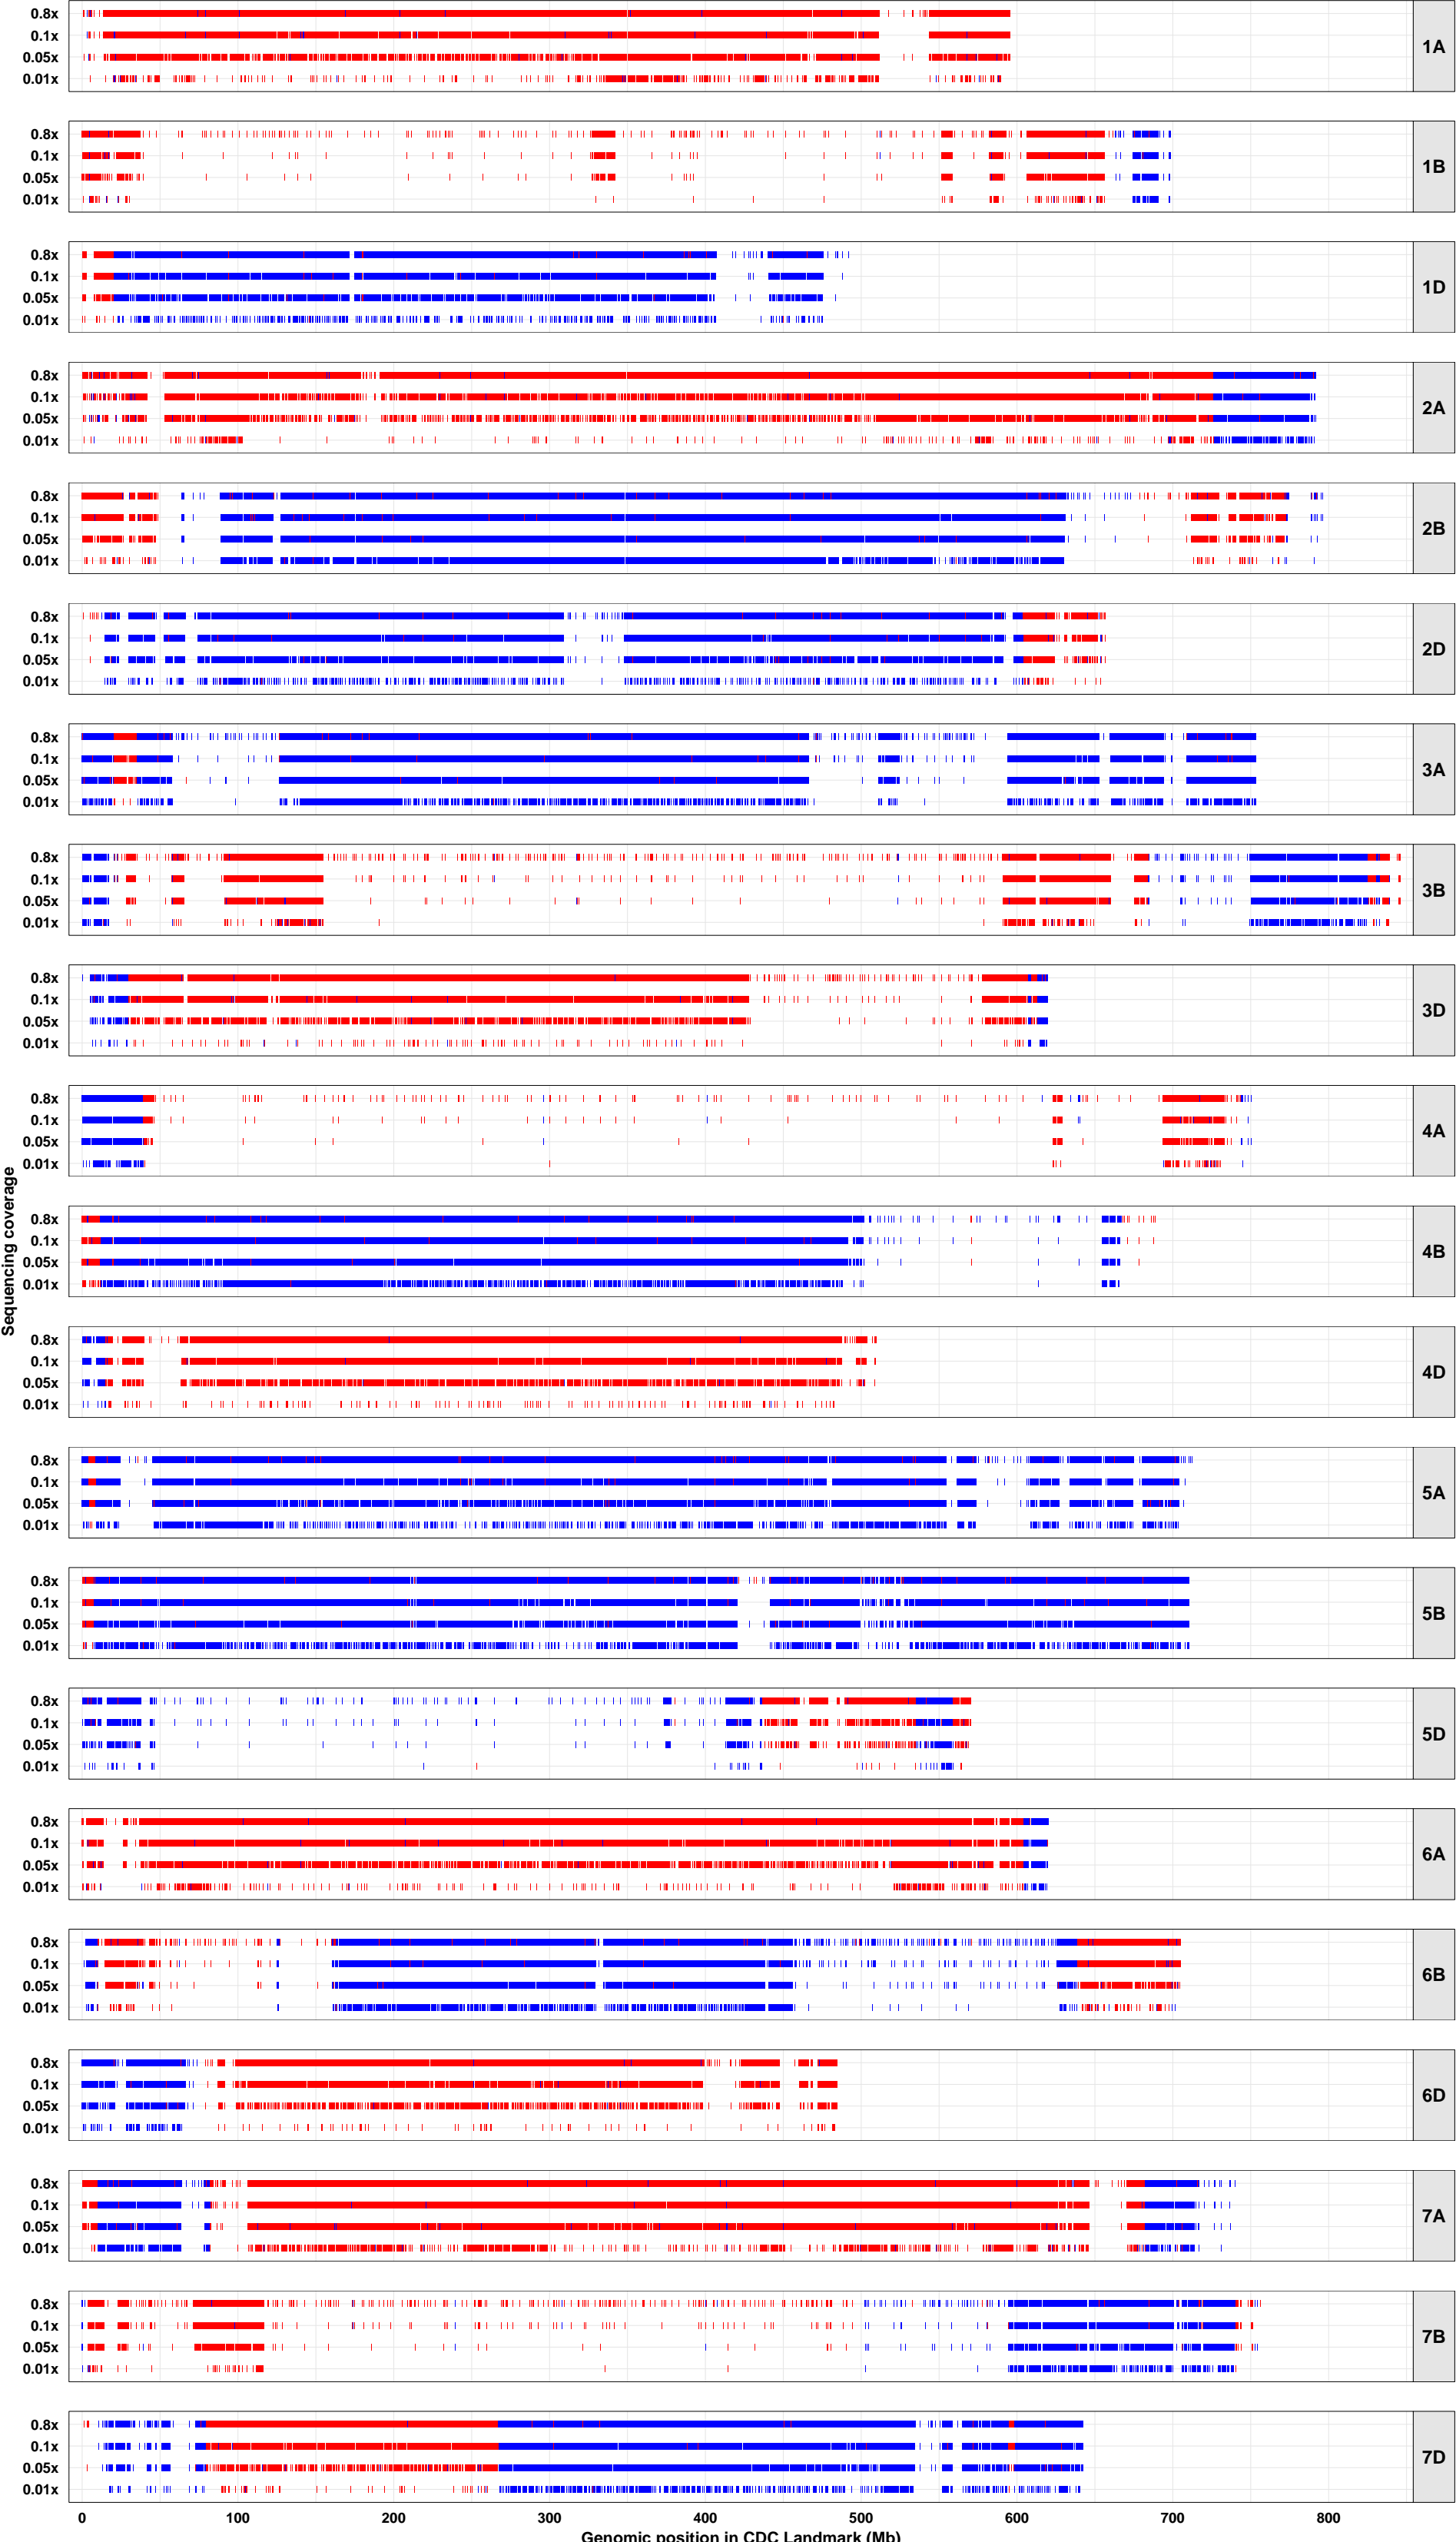

Supplement: Supplementary file 26 [file StanleyLandmarkDH01070-0.pdf › Supplementary-Figure-S3_StanleyLandmarkDH/StanleyLandmarkDH01070-0.pdf]

StanleyLandmarkKDHO1072-0

CDC Landmark CDC Stanley

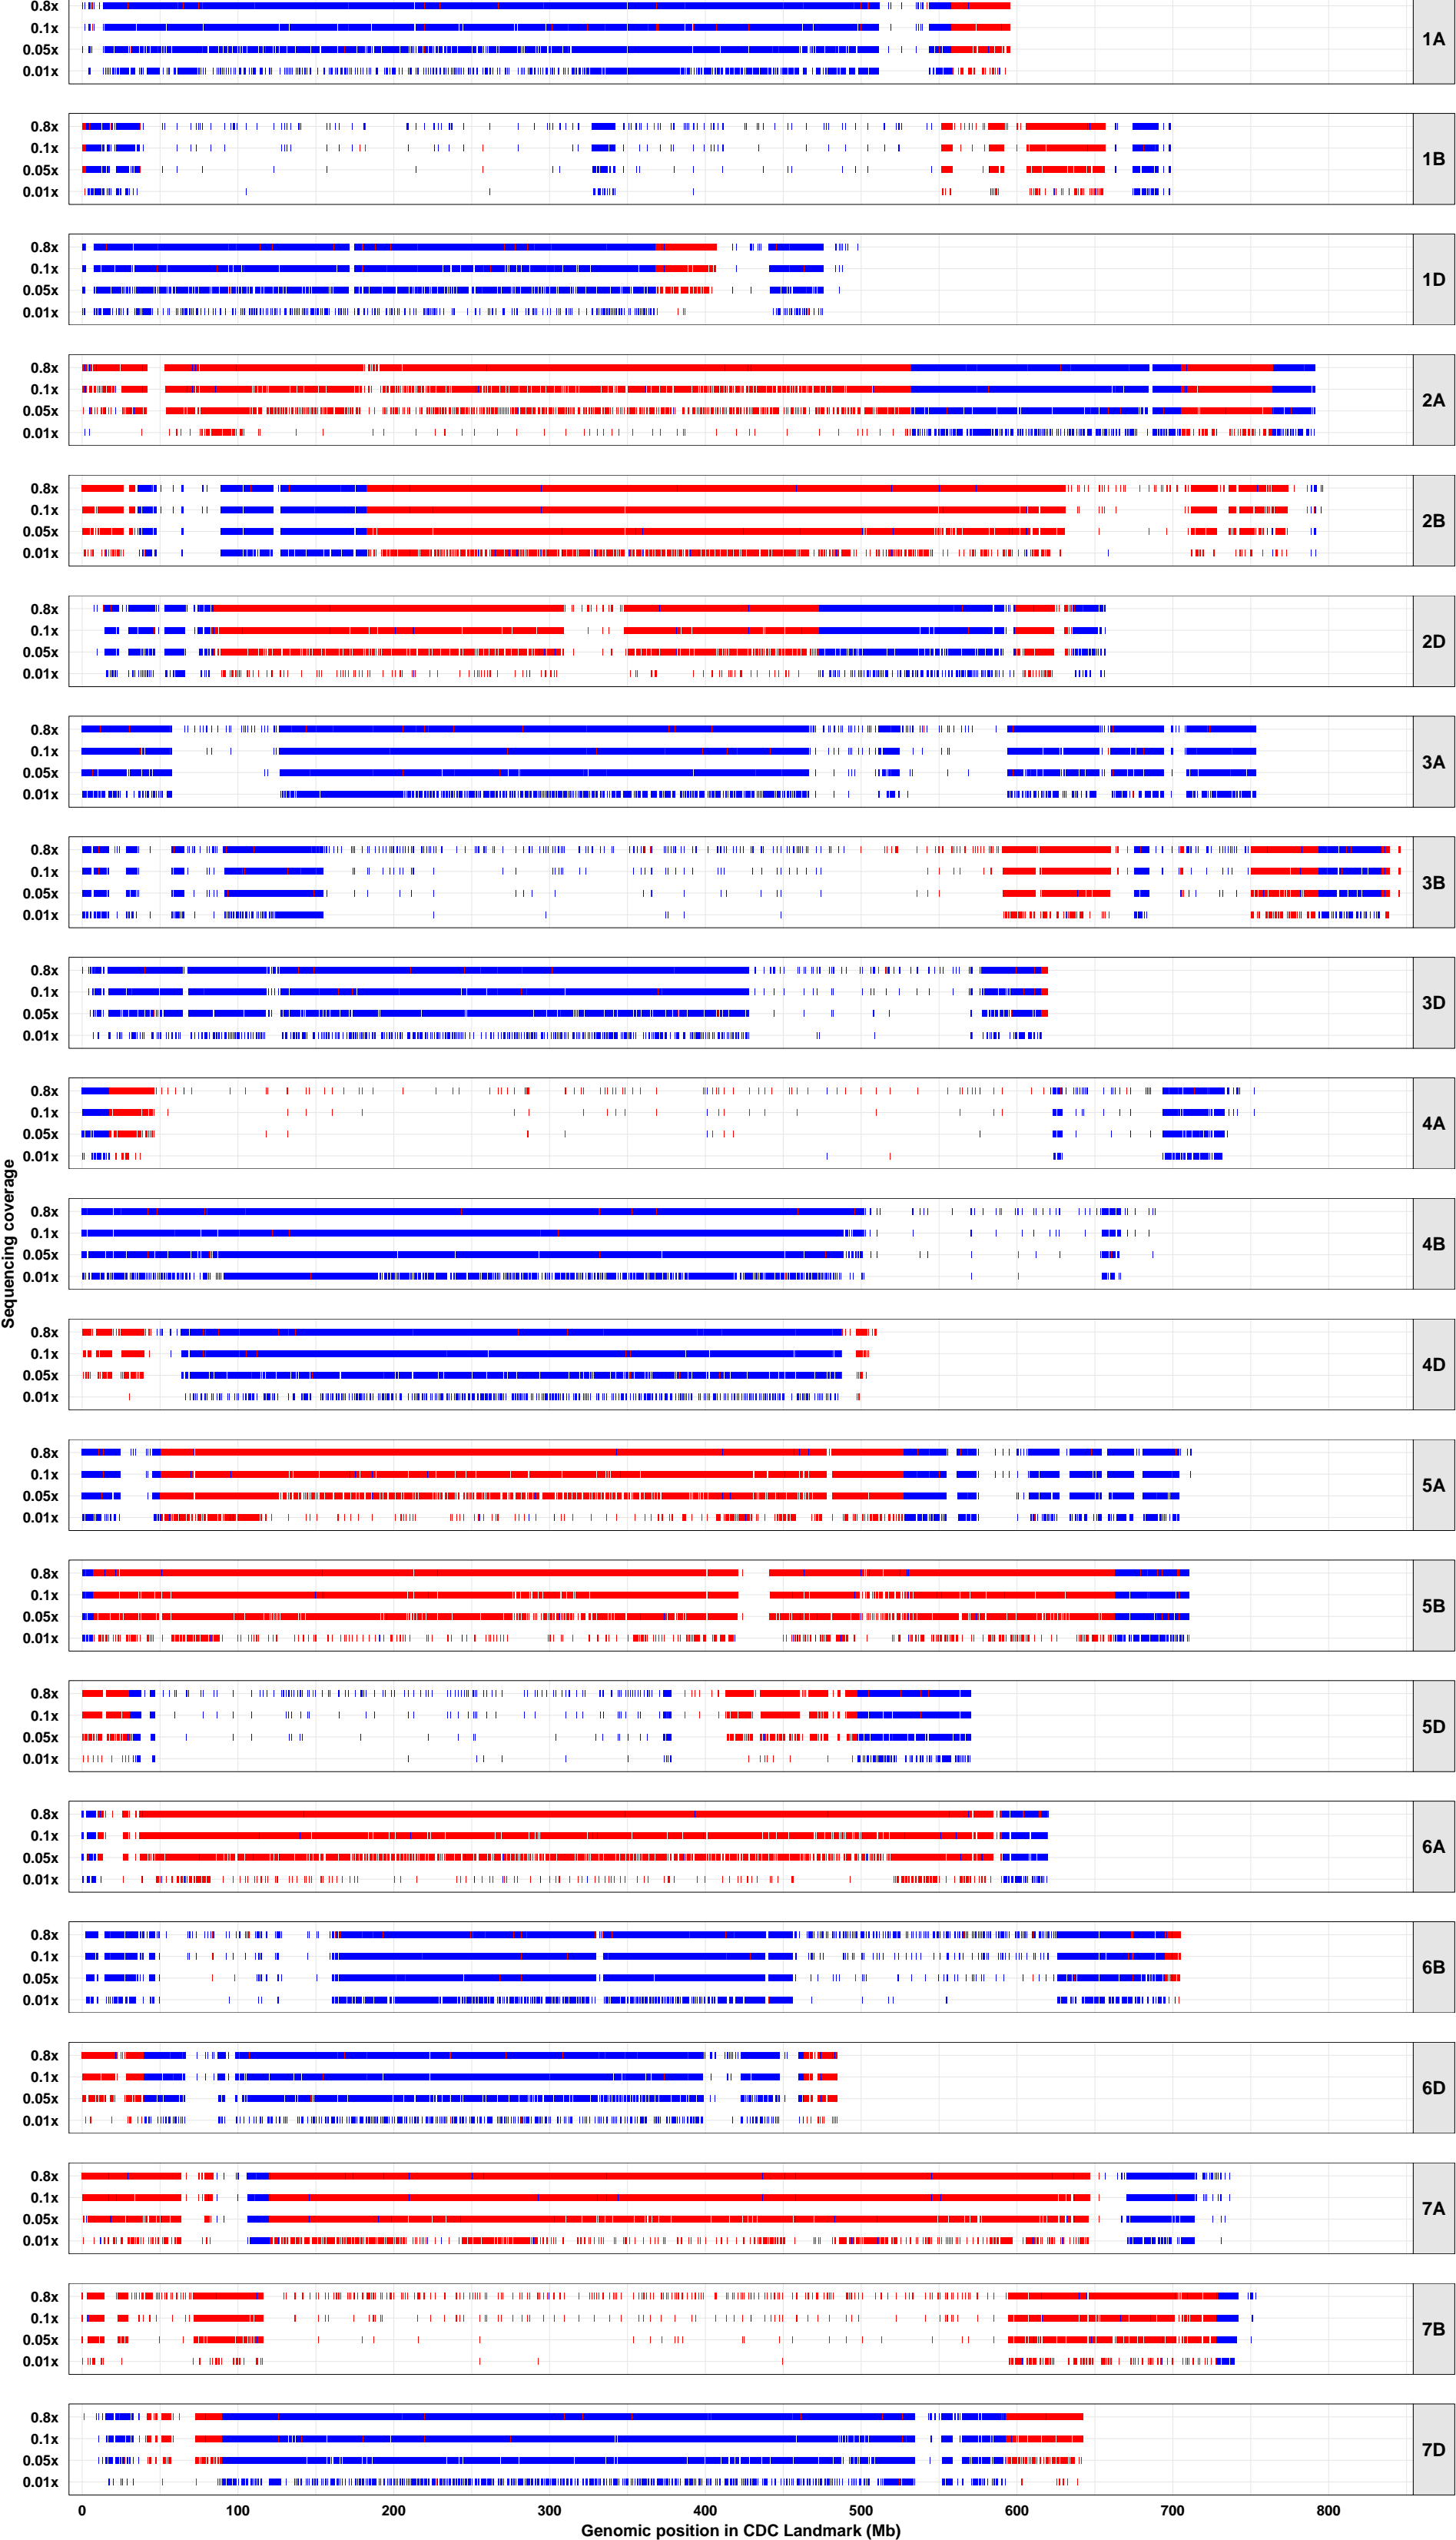

Supplement: Supplementary file 27 [file StanleyLandmarkDH01072-0.pdf › Supplementary-Figure-S3_StanleyLandmarkDH/StanleyLandmarkDH01072-0.pdf]

StanleyLandmarkDH01076-0

CDC Landmark CDC Stanley

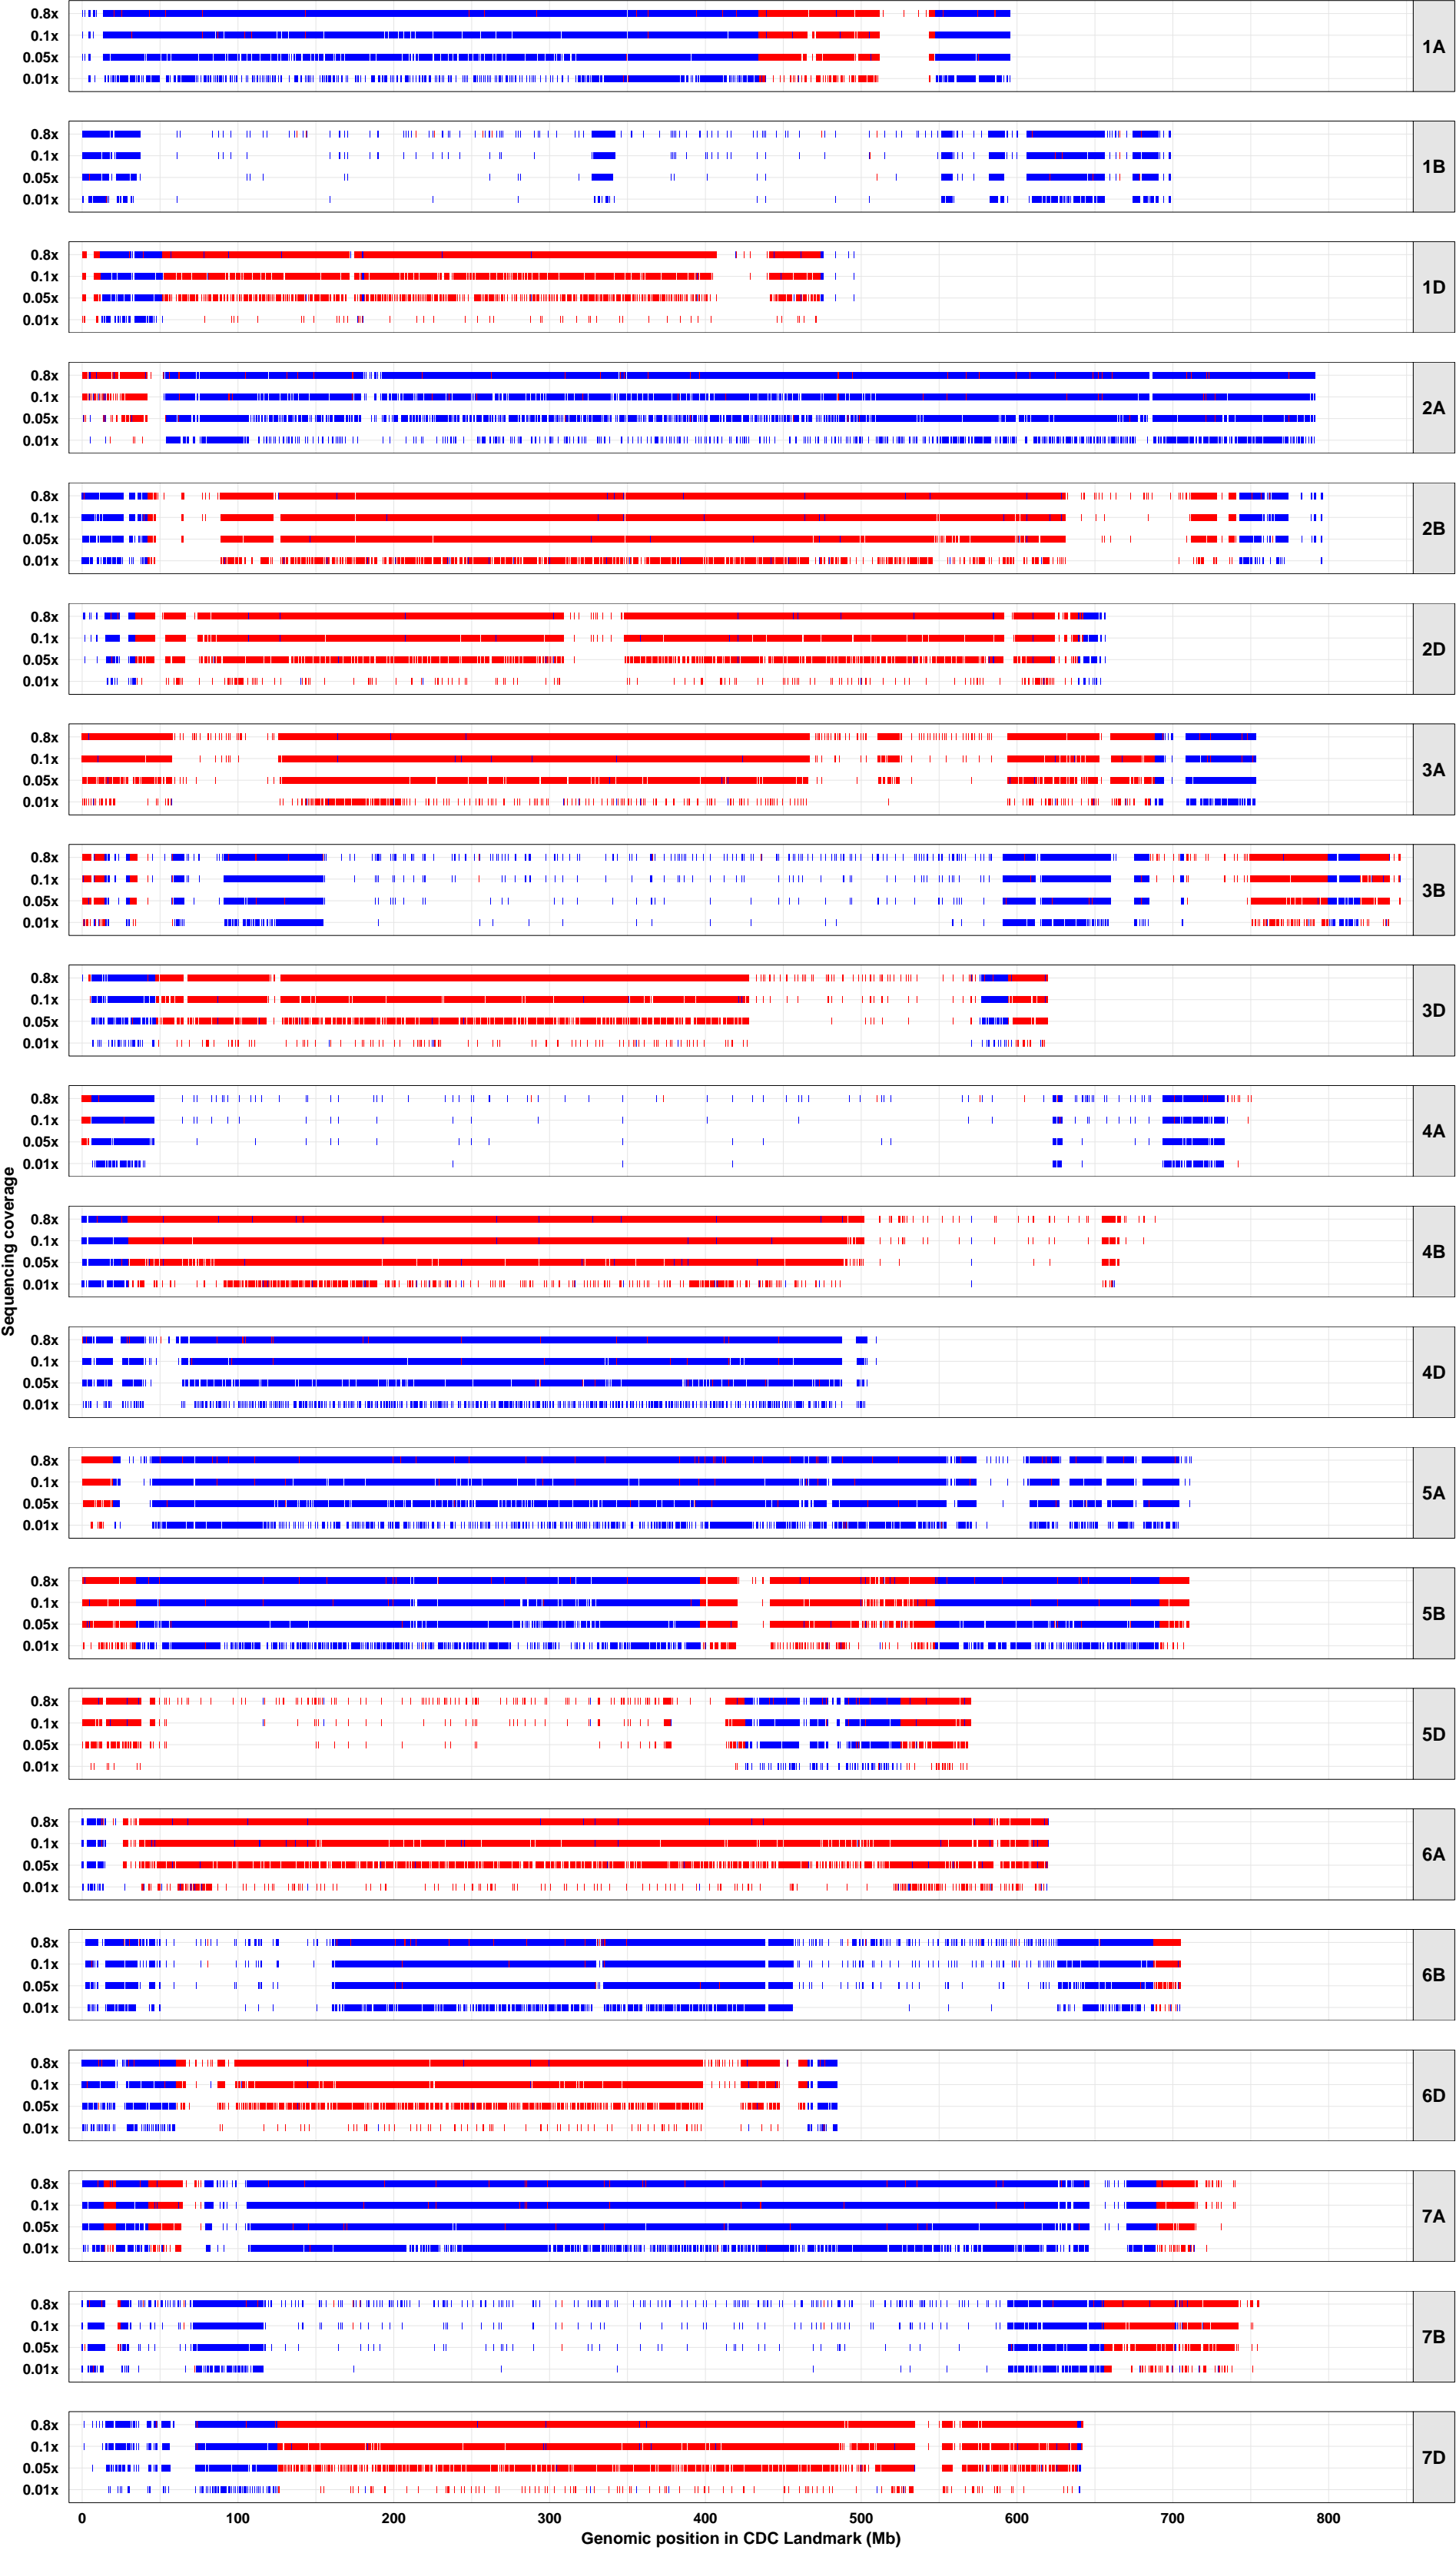

Supplement: Supplementary file 28 [file StanleyLandmarkDH01076-0.pdf › Supplementary-Figure-S3_StanleyLandmarkDH/StanleyLandmarkDH01076-0.pdf]

StanleyLandmarkDH01082-0

CDC Landmark CDC Stanley

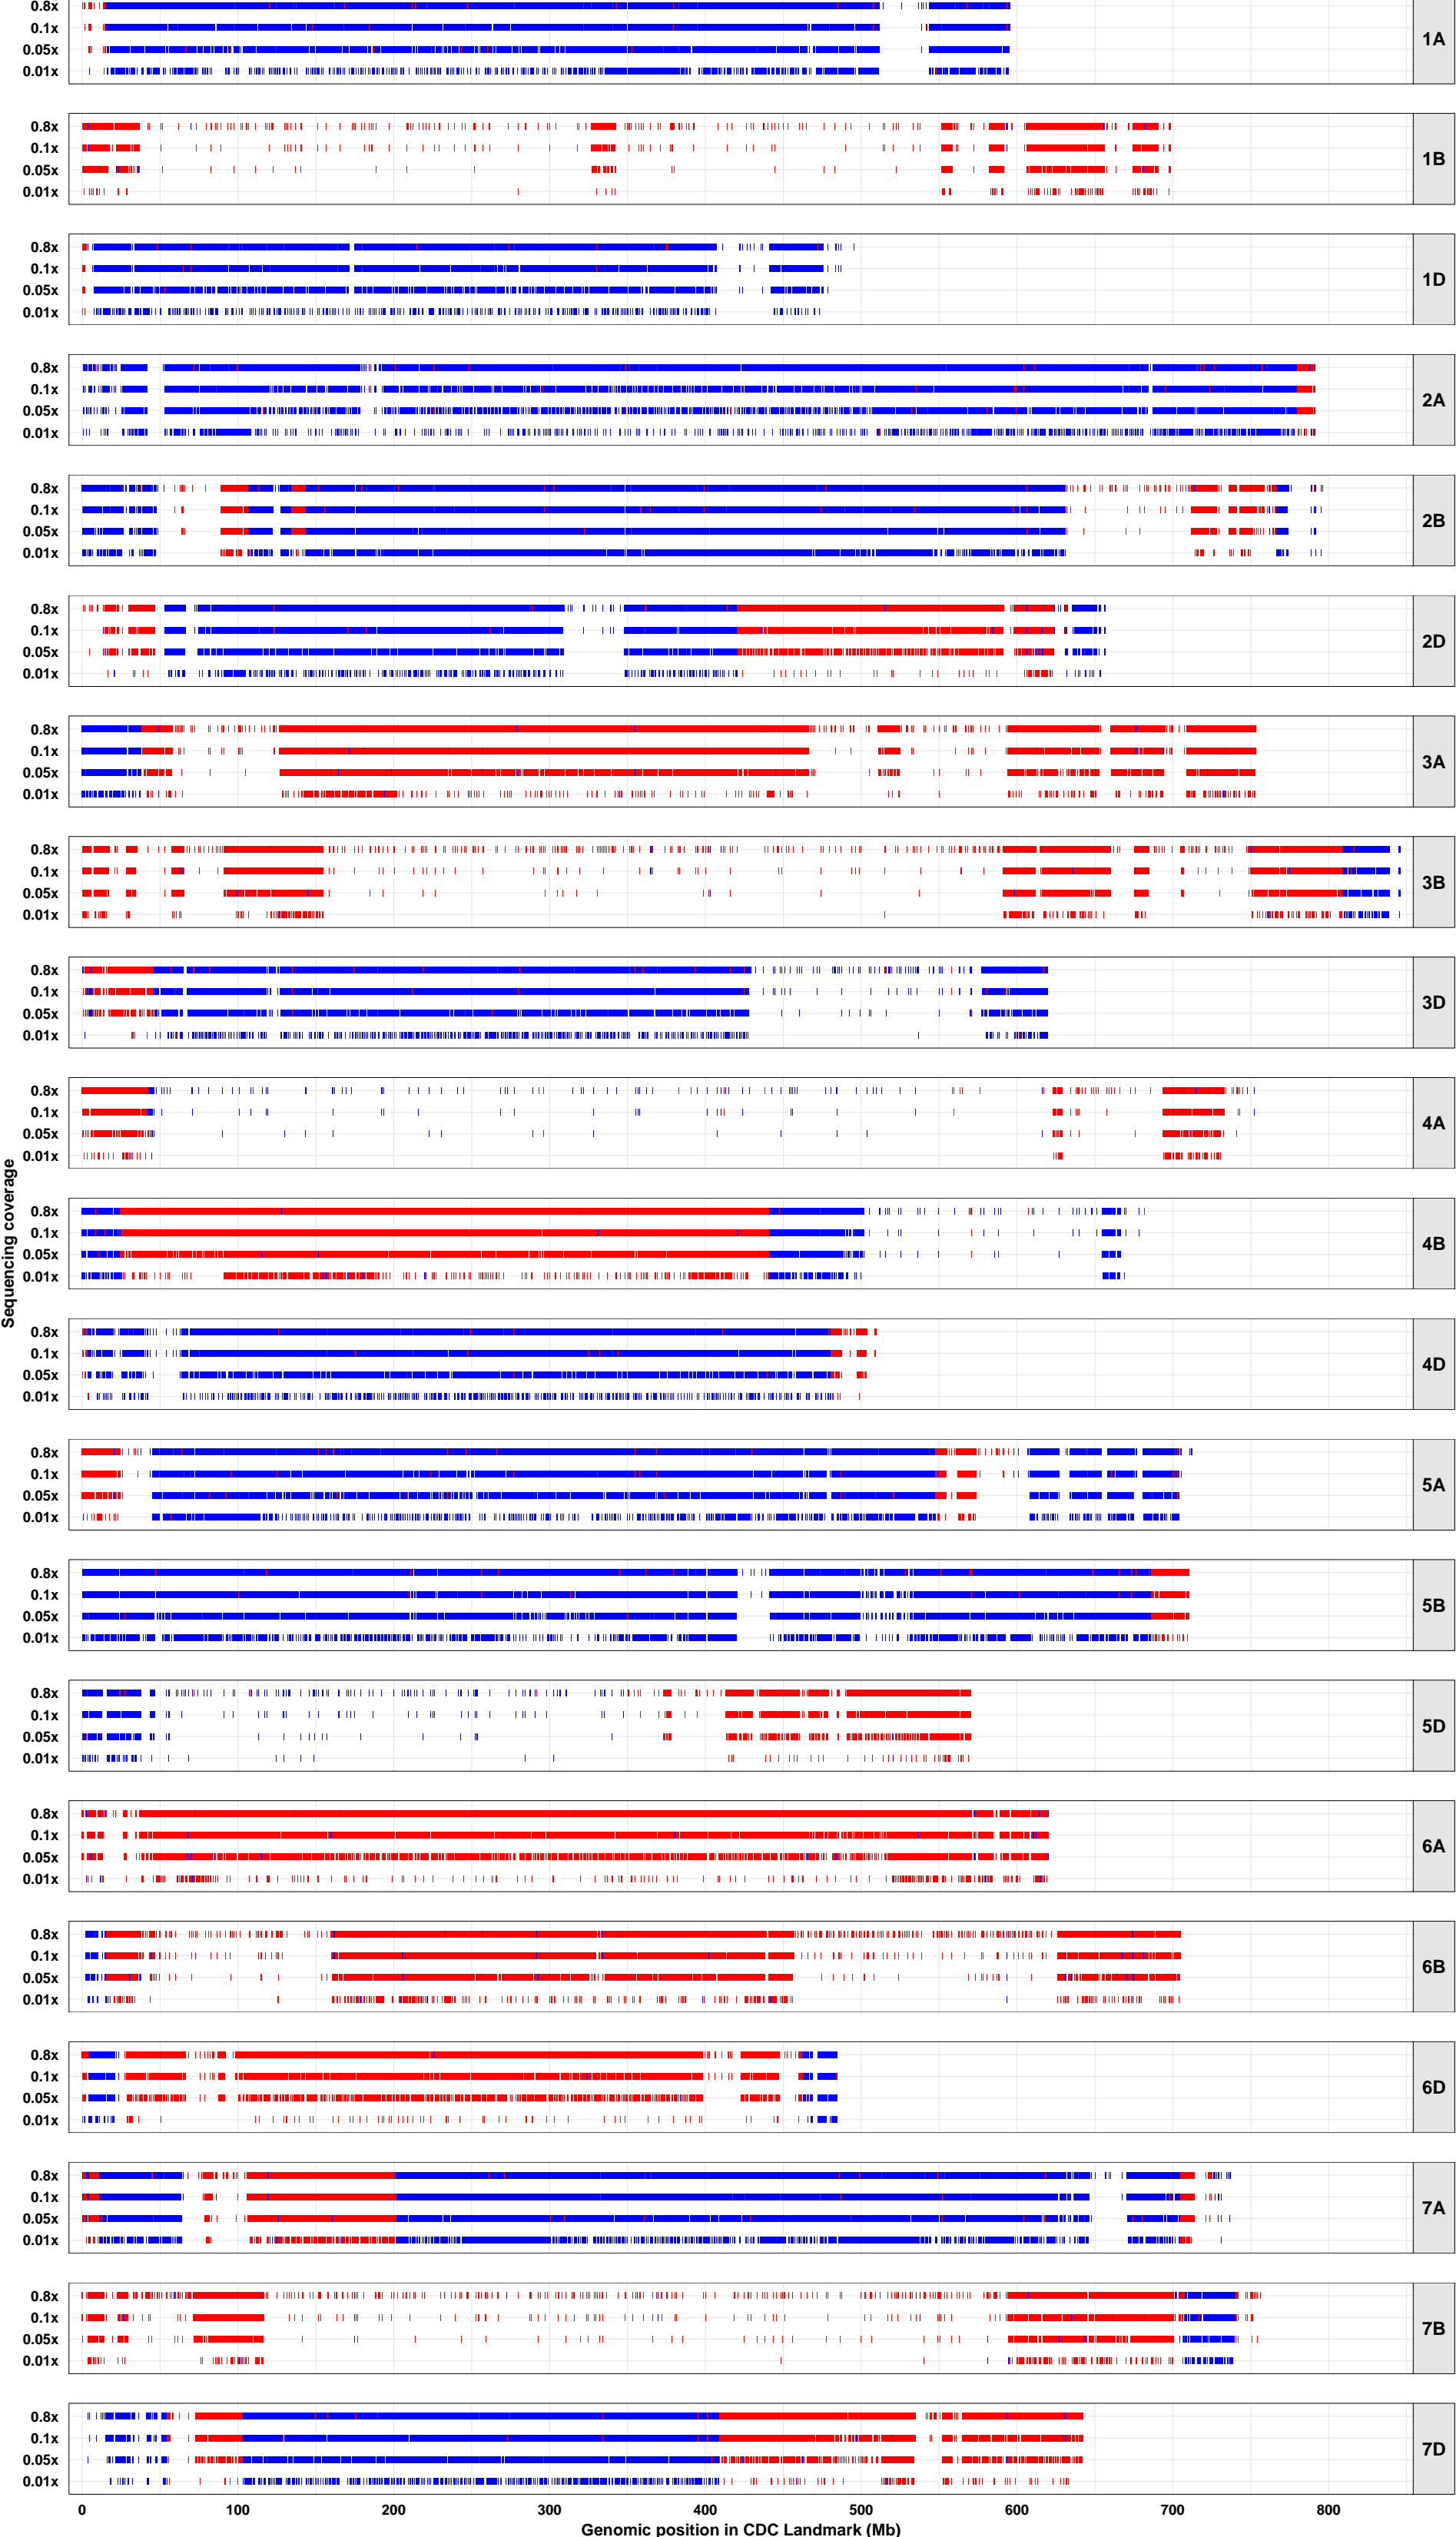

Supplement: Supplementary file 29 [file StanleyLandmarkDH01082-0.pdf › Supplementary-Figure-S3_StanleyLandmarkDH/StanleyLandmarkDH01082-0.pdf]

StanleyLandmarkKDHO1083-0

CDC Landmark CDC Stanley

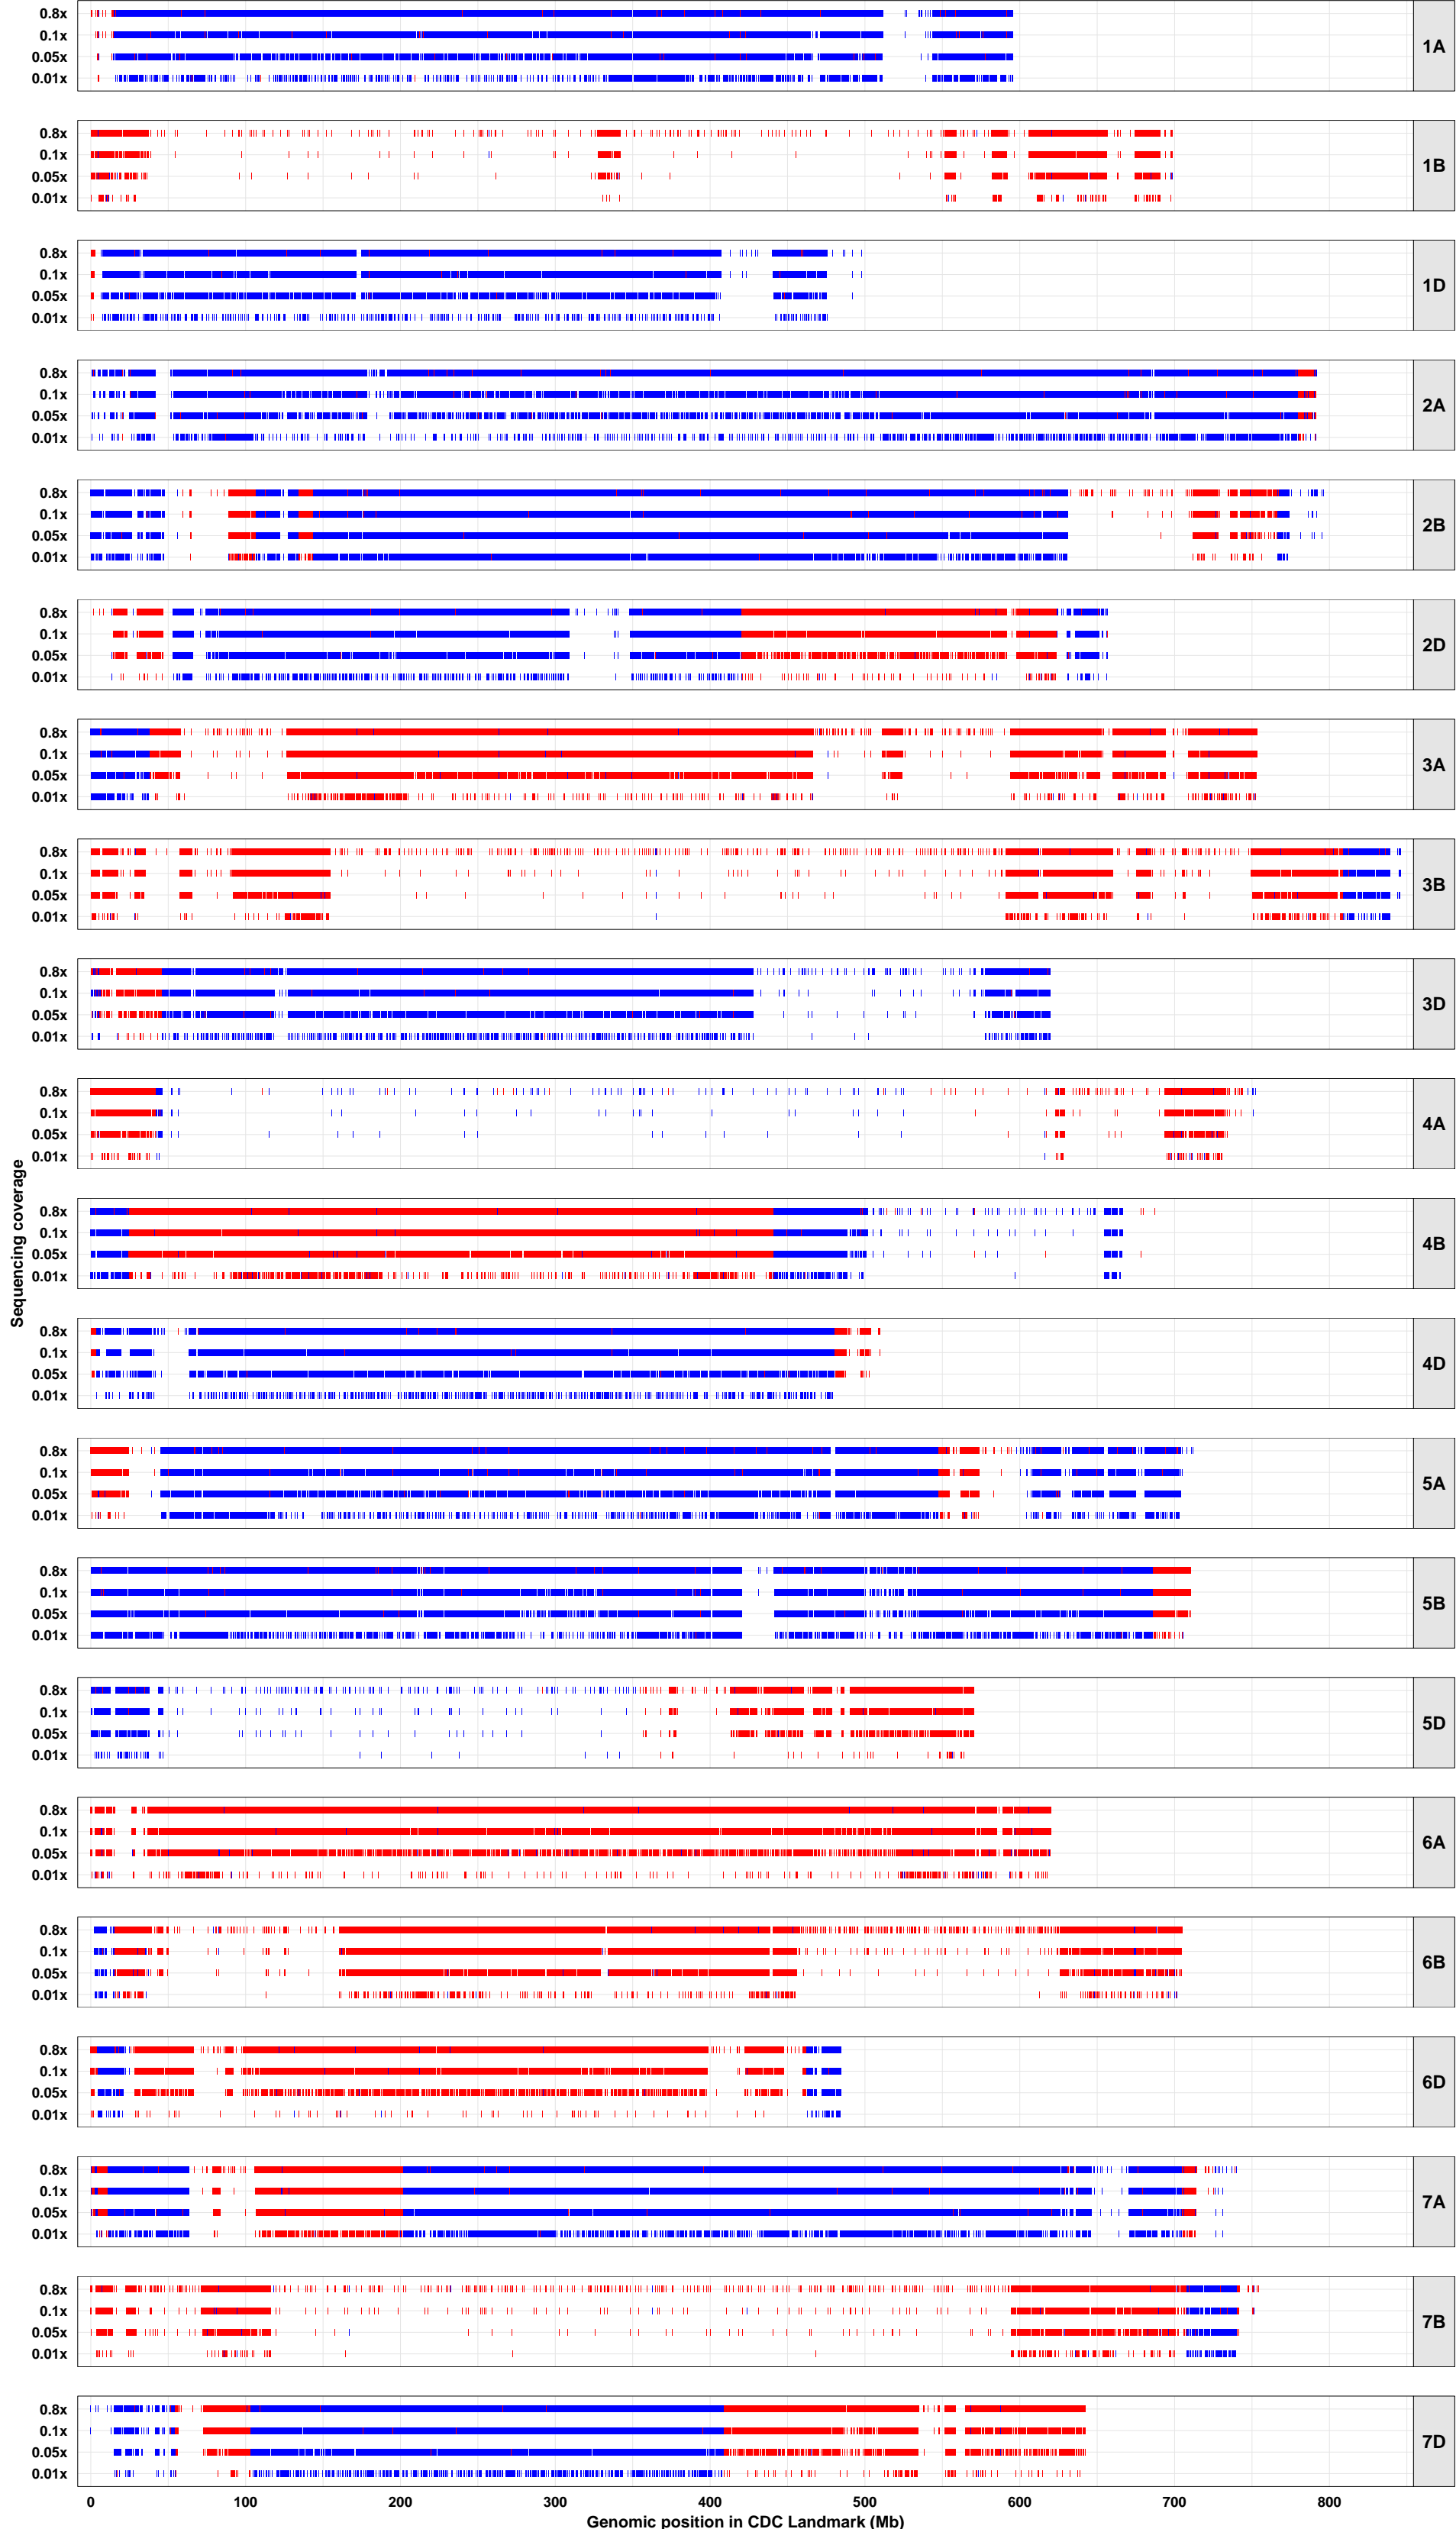

Supplement: Supplementary file 30 [file StanleyLandmarkDH01083-0.pdf › Supplementary-Figure-S3_StanleyLandmarkDH/StanleyLandmarkDH01083-0.pdf]

StanleyLandmarkDH01092-0

CDC Landmark CDC Stanley

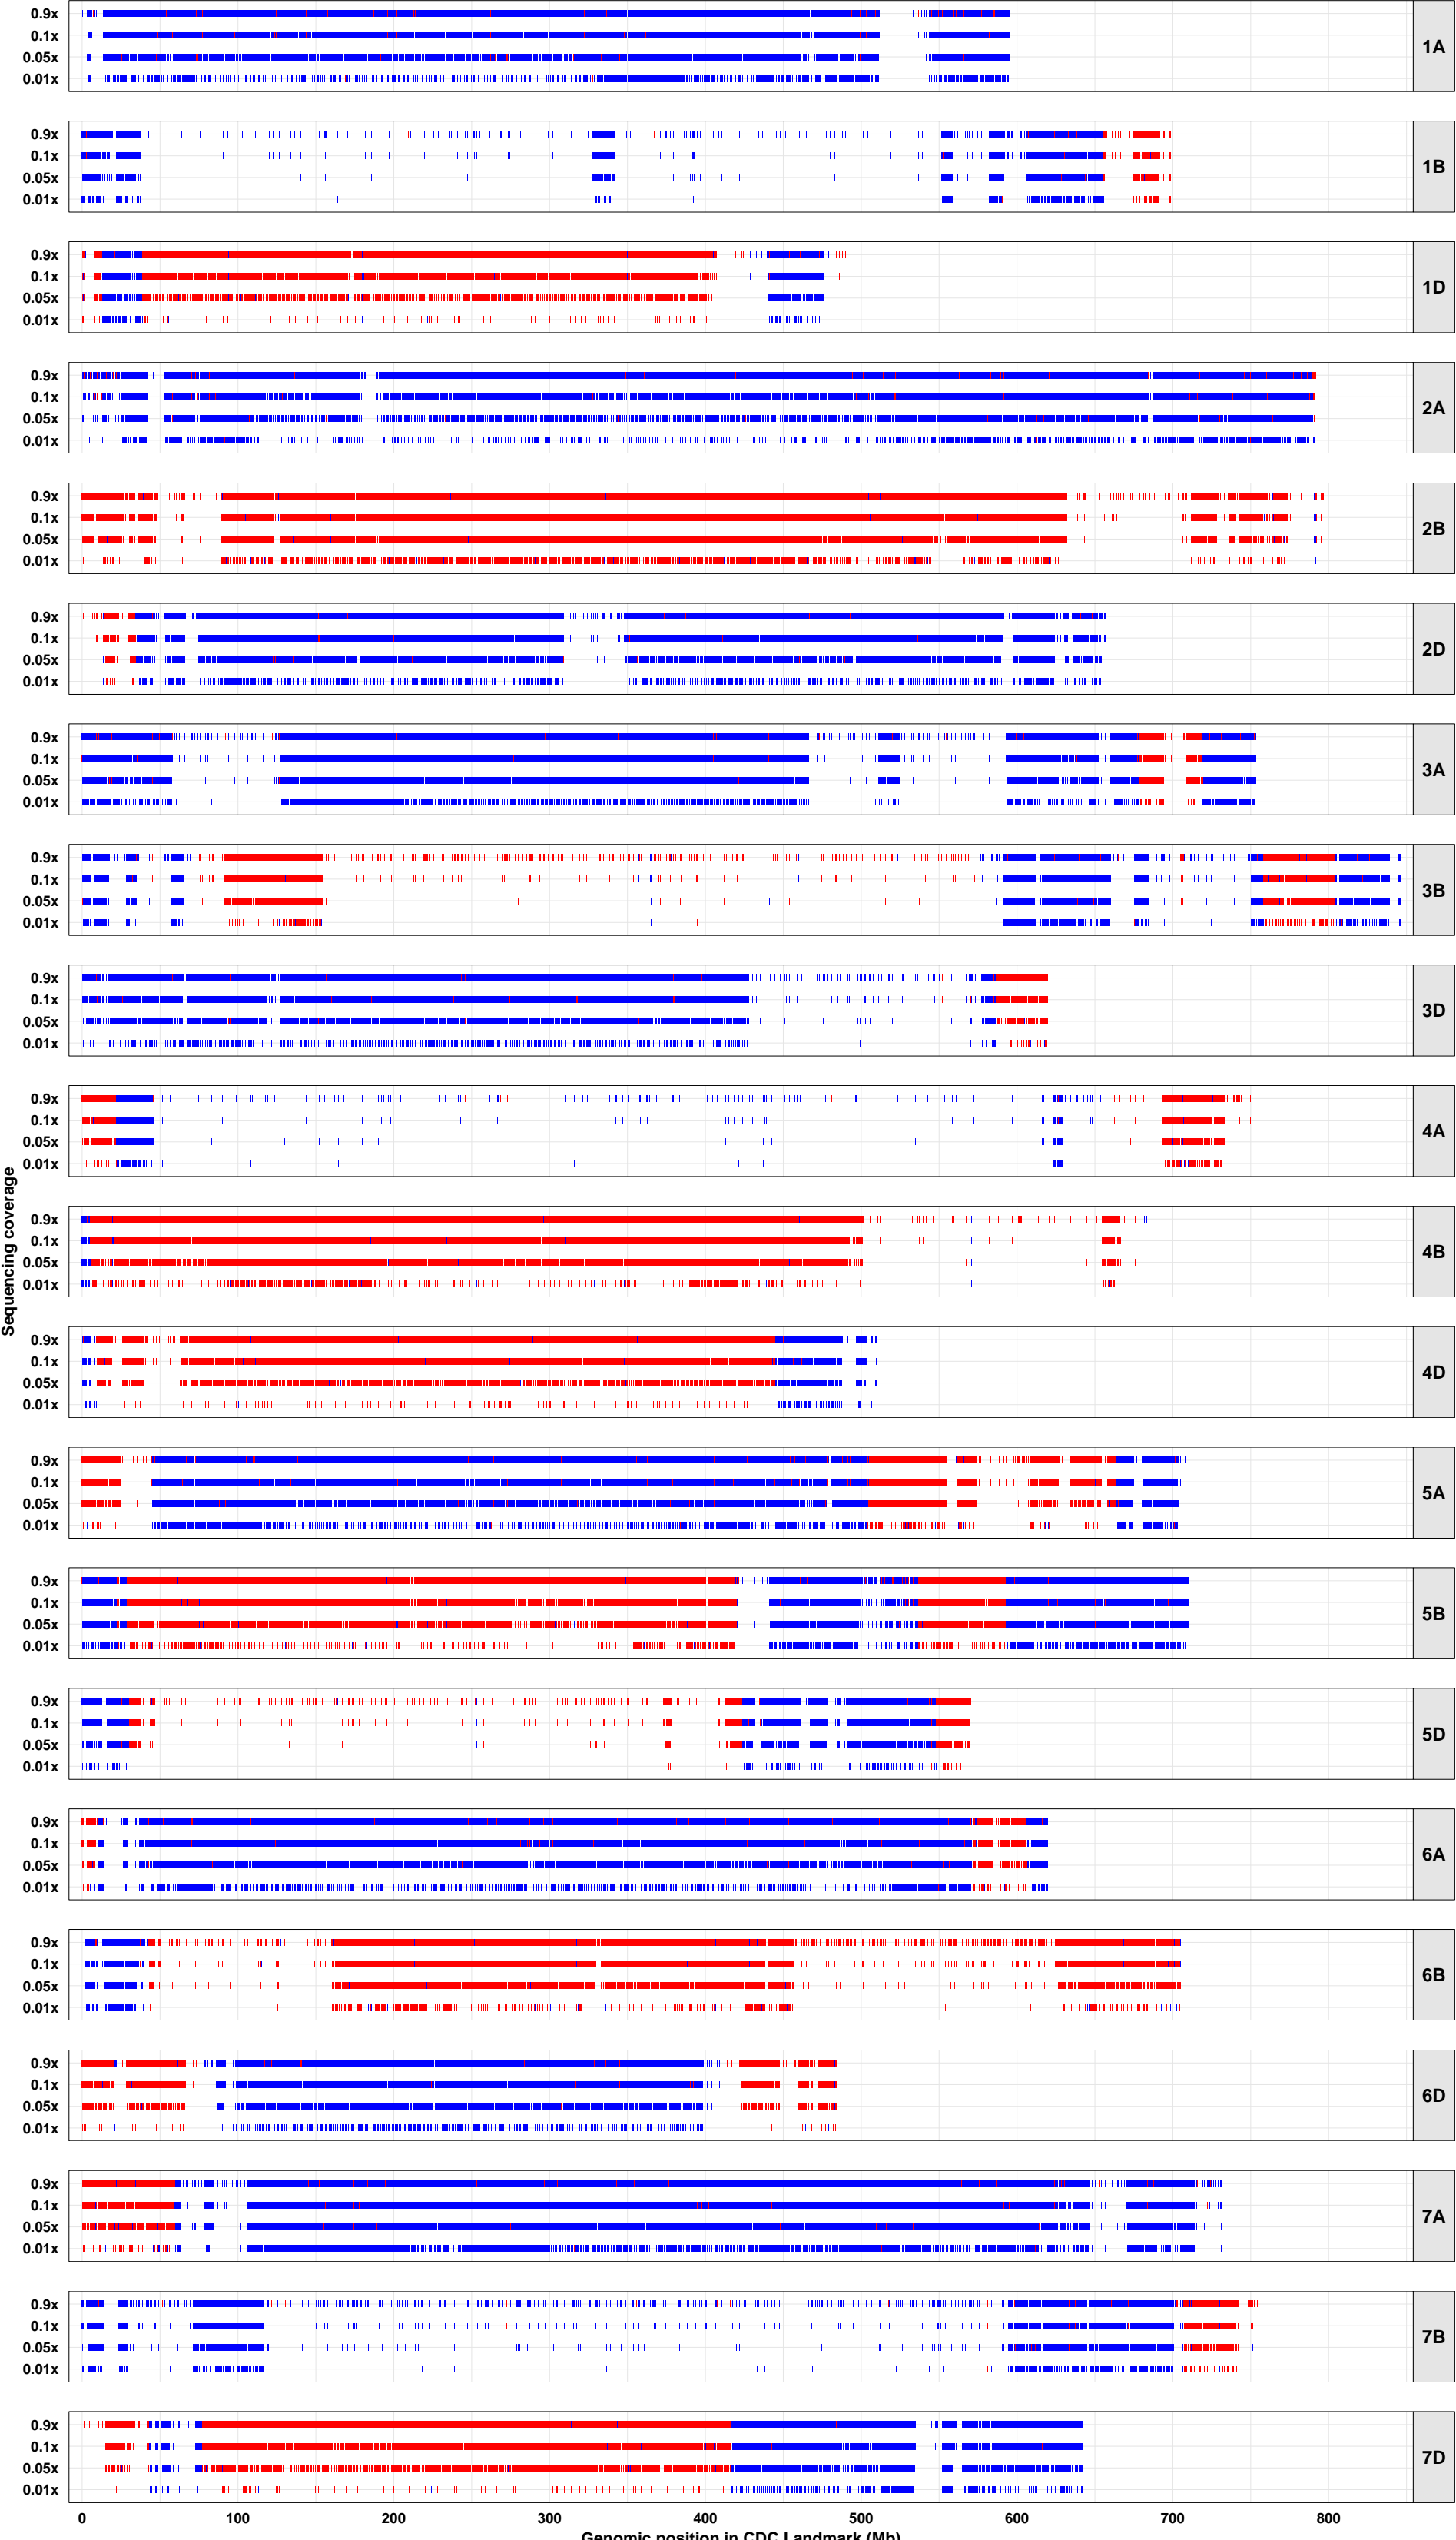

Supplement: Supplementary file 31 [file StanleyLandmarkDH01092-0.pdf › Supplementary-Figure-S3_StanleyLandmarkDH/StanleyLandmarkDH01092-0.pdf]

StanleyLandmarkDH01093-0

CDC Landmark CDC Stanley

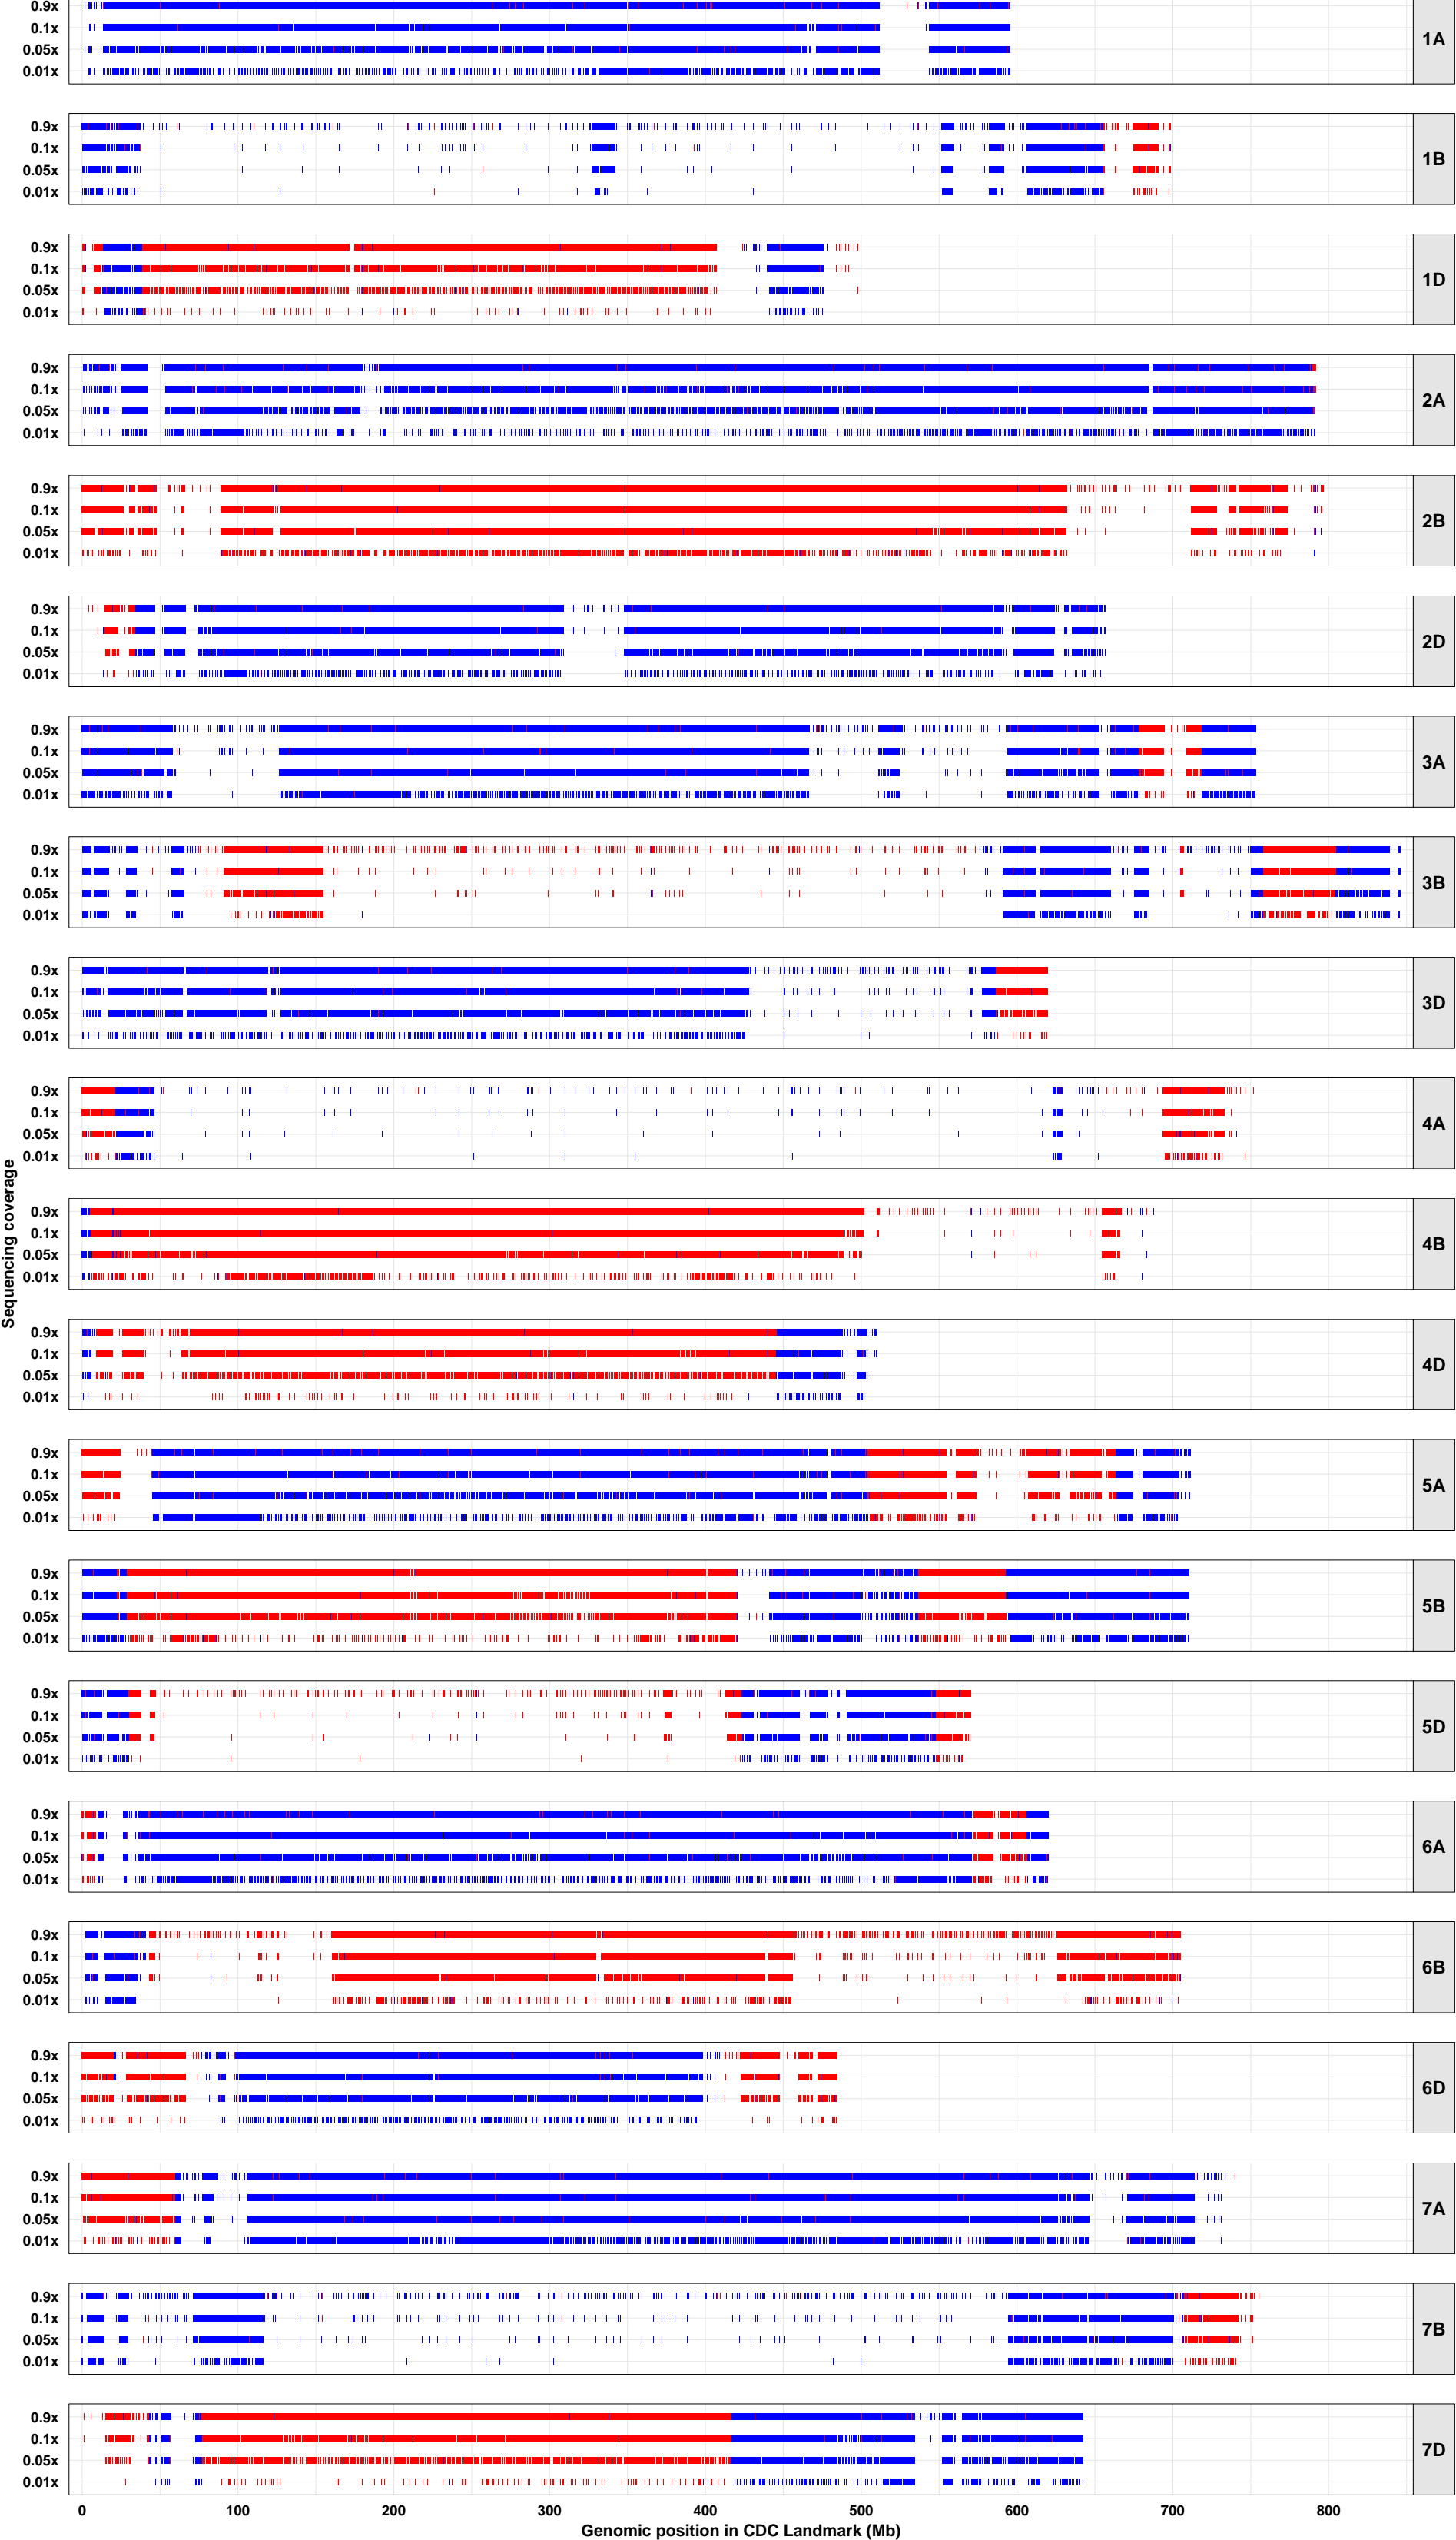

Supplement: Supplementary file 32 [file StanleyLandmarkDH01093-0.pdf › Supplementary-Figure-S3_StanleyLandmarkDH/StanleyLandmarkDH01093-0.pdf]

StanleyLandmarkDH01095-0

CDC Landmark CDC Stanley

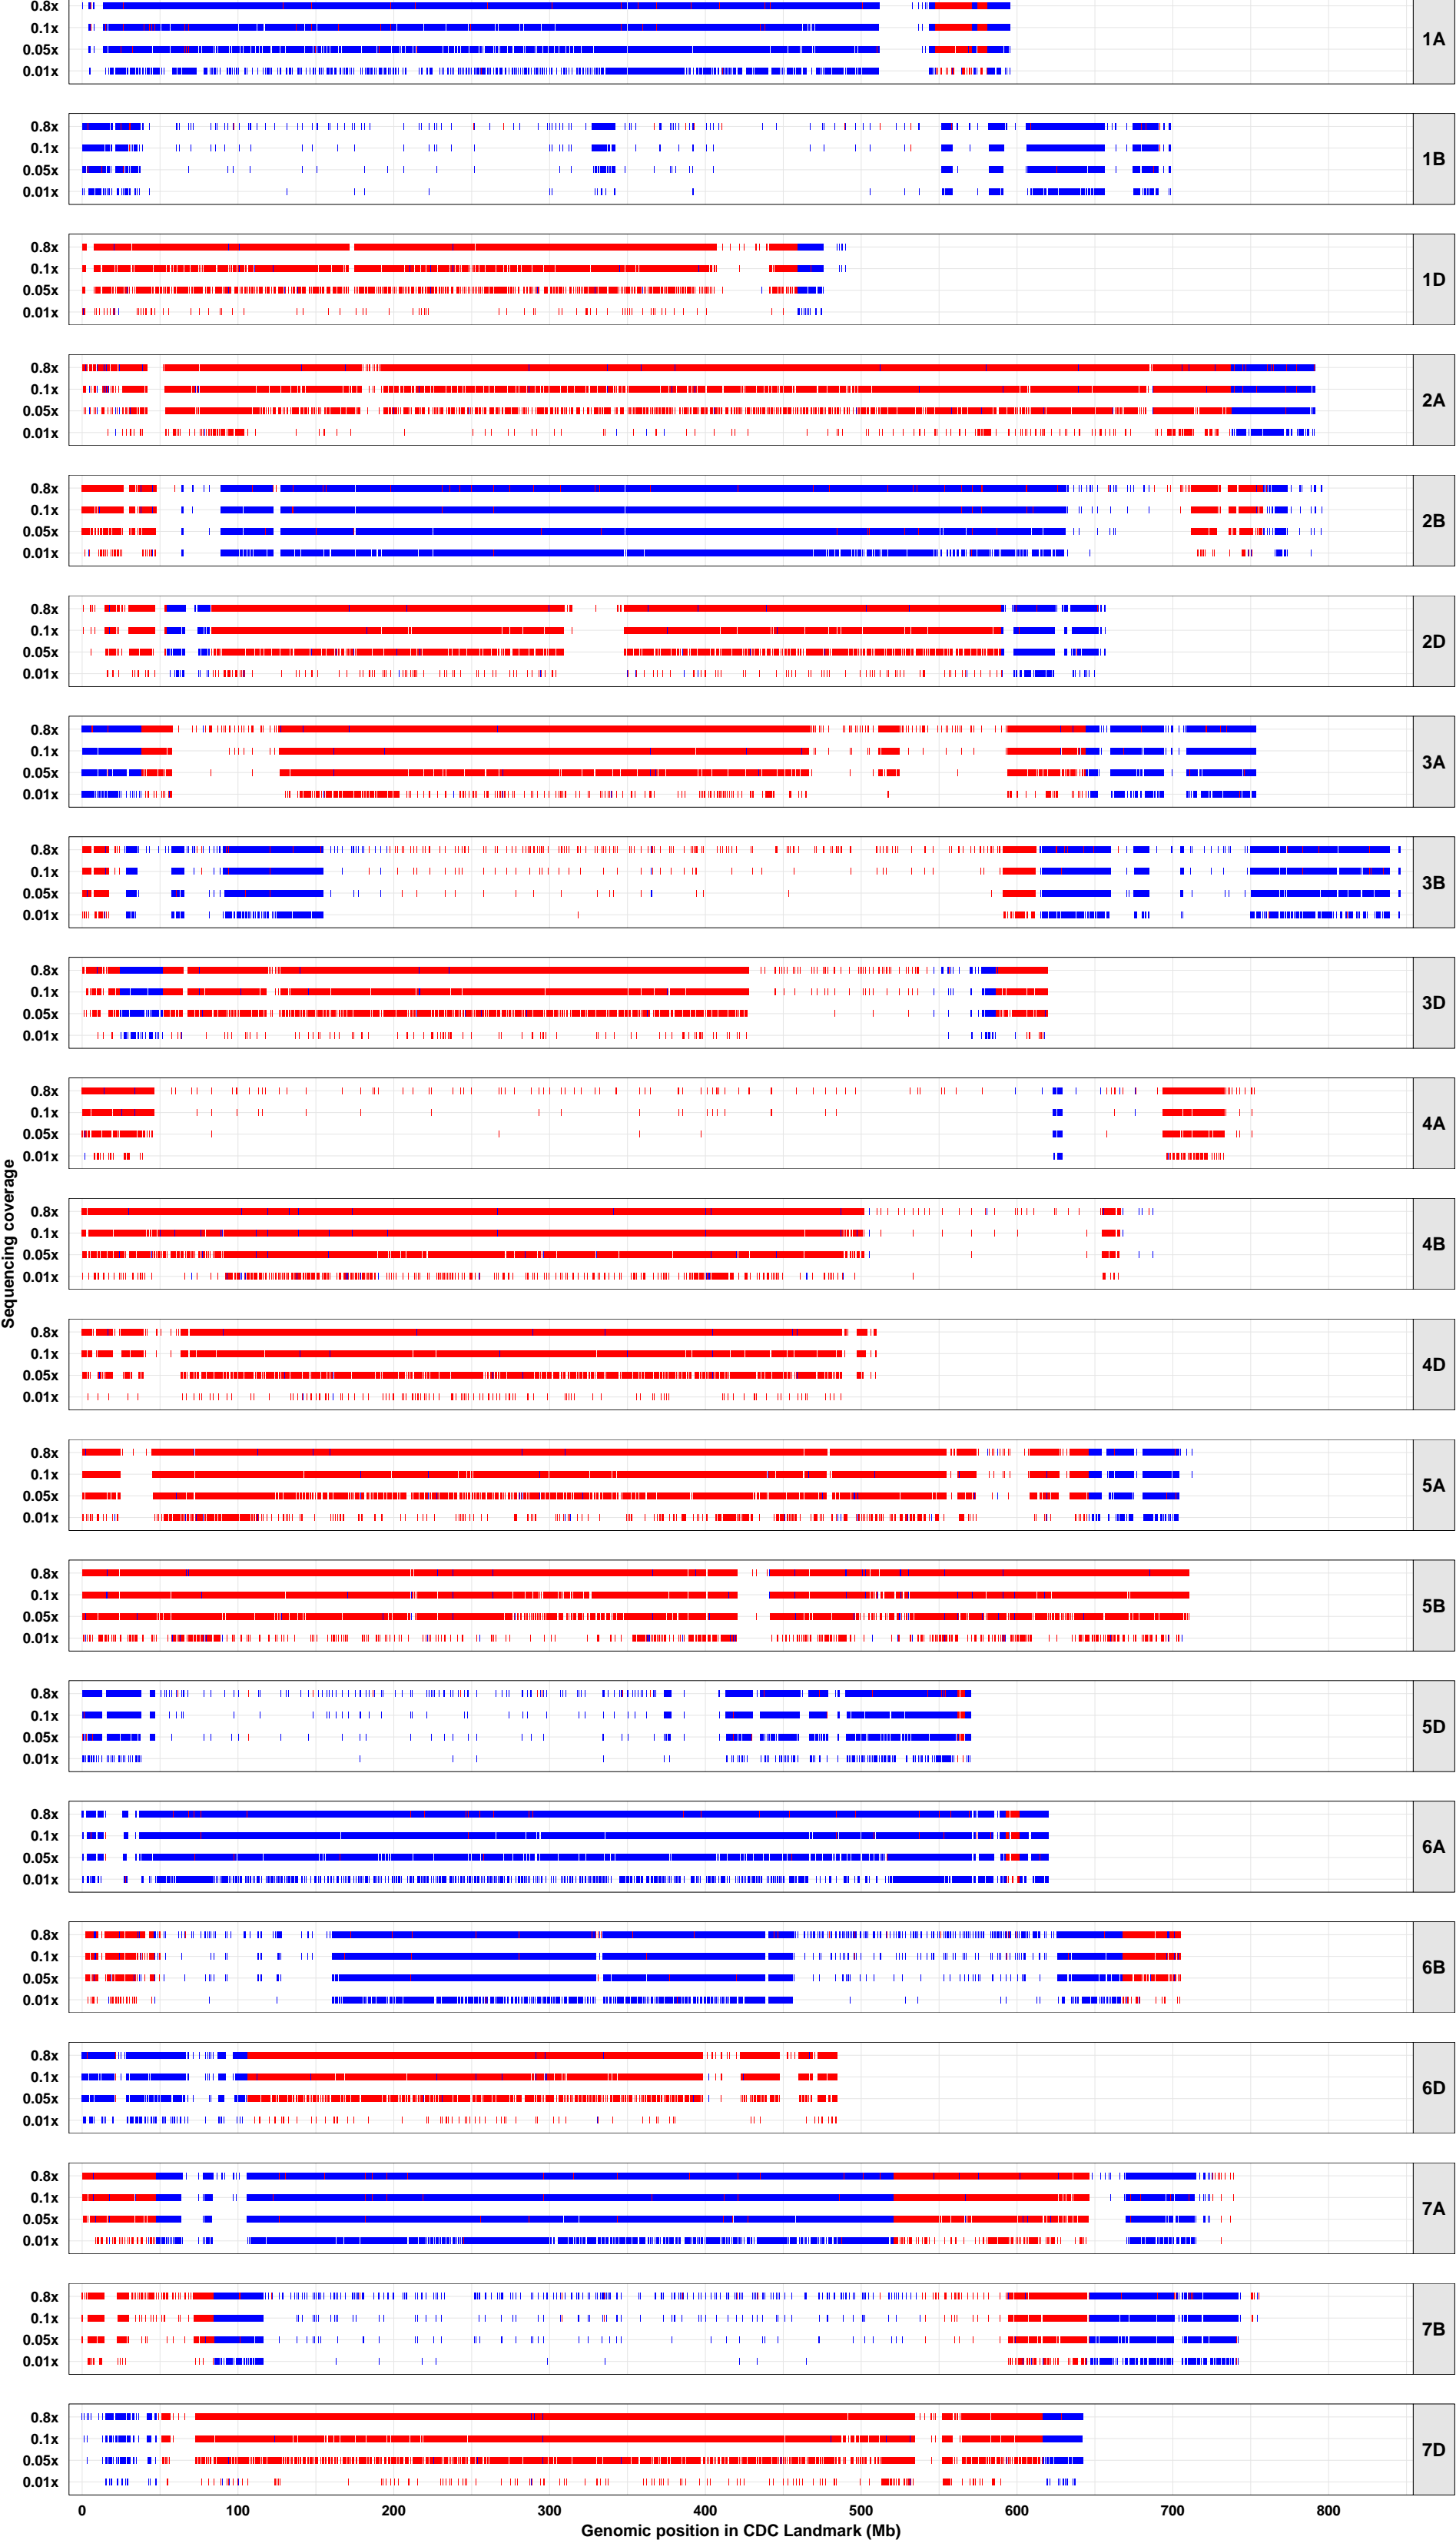

Supplement: Supplementary file 33 [file StanleyLandmarkDH01095-0.pdf › Supplementary-Figure-S3_StanleyLandmarkDH/StanleyLandmarkDH01095-0.pdf]

StanleyLandmarkKDHO1097-0

CDC Landmark CDC Stanley

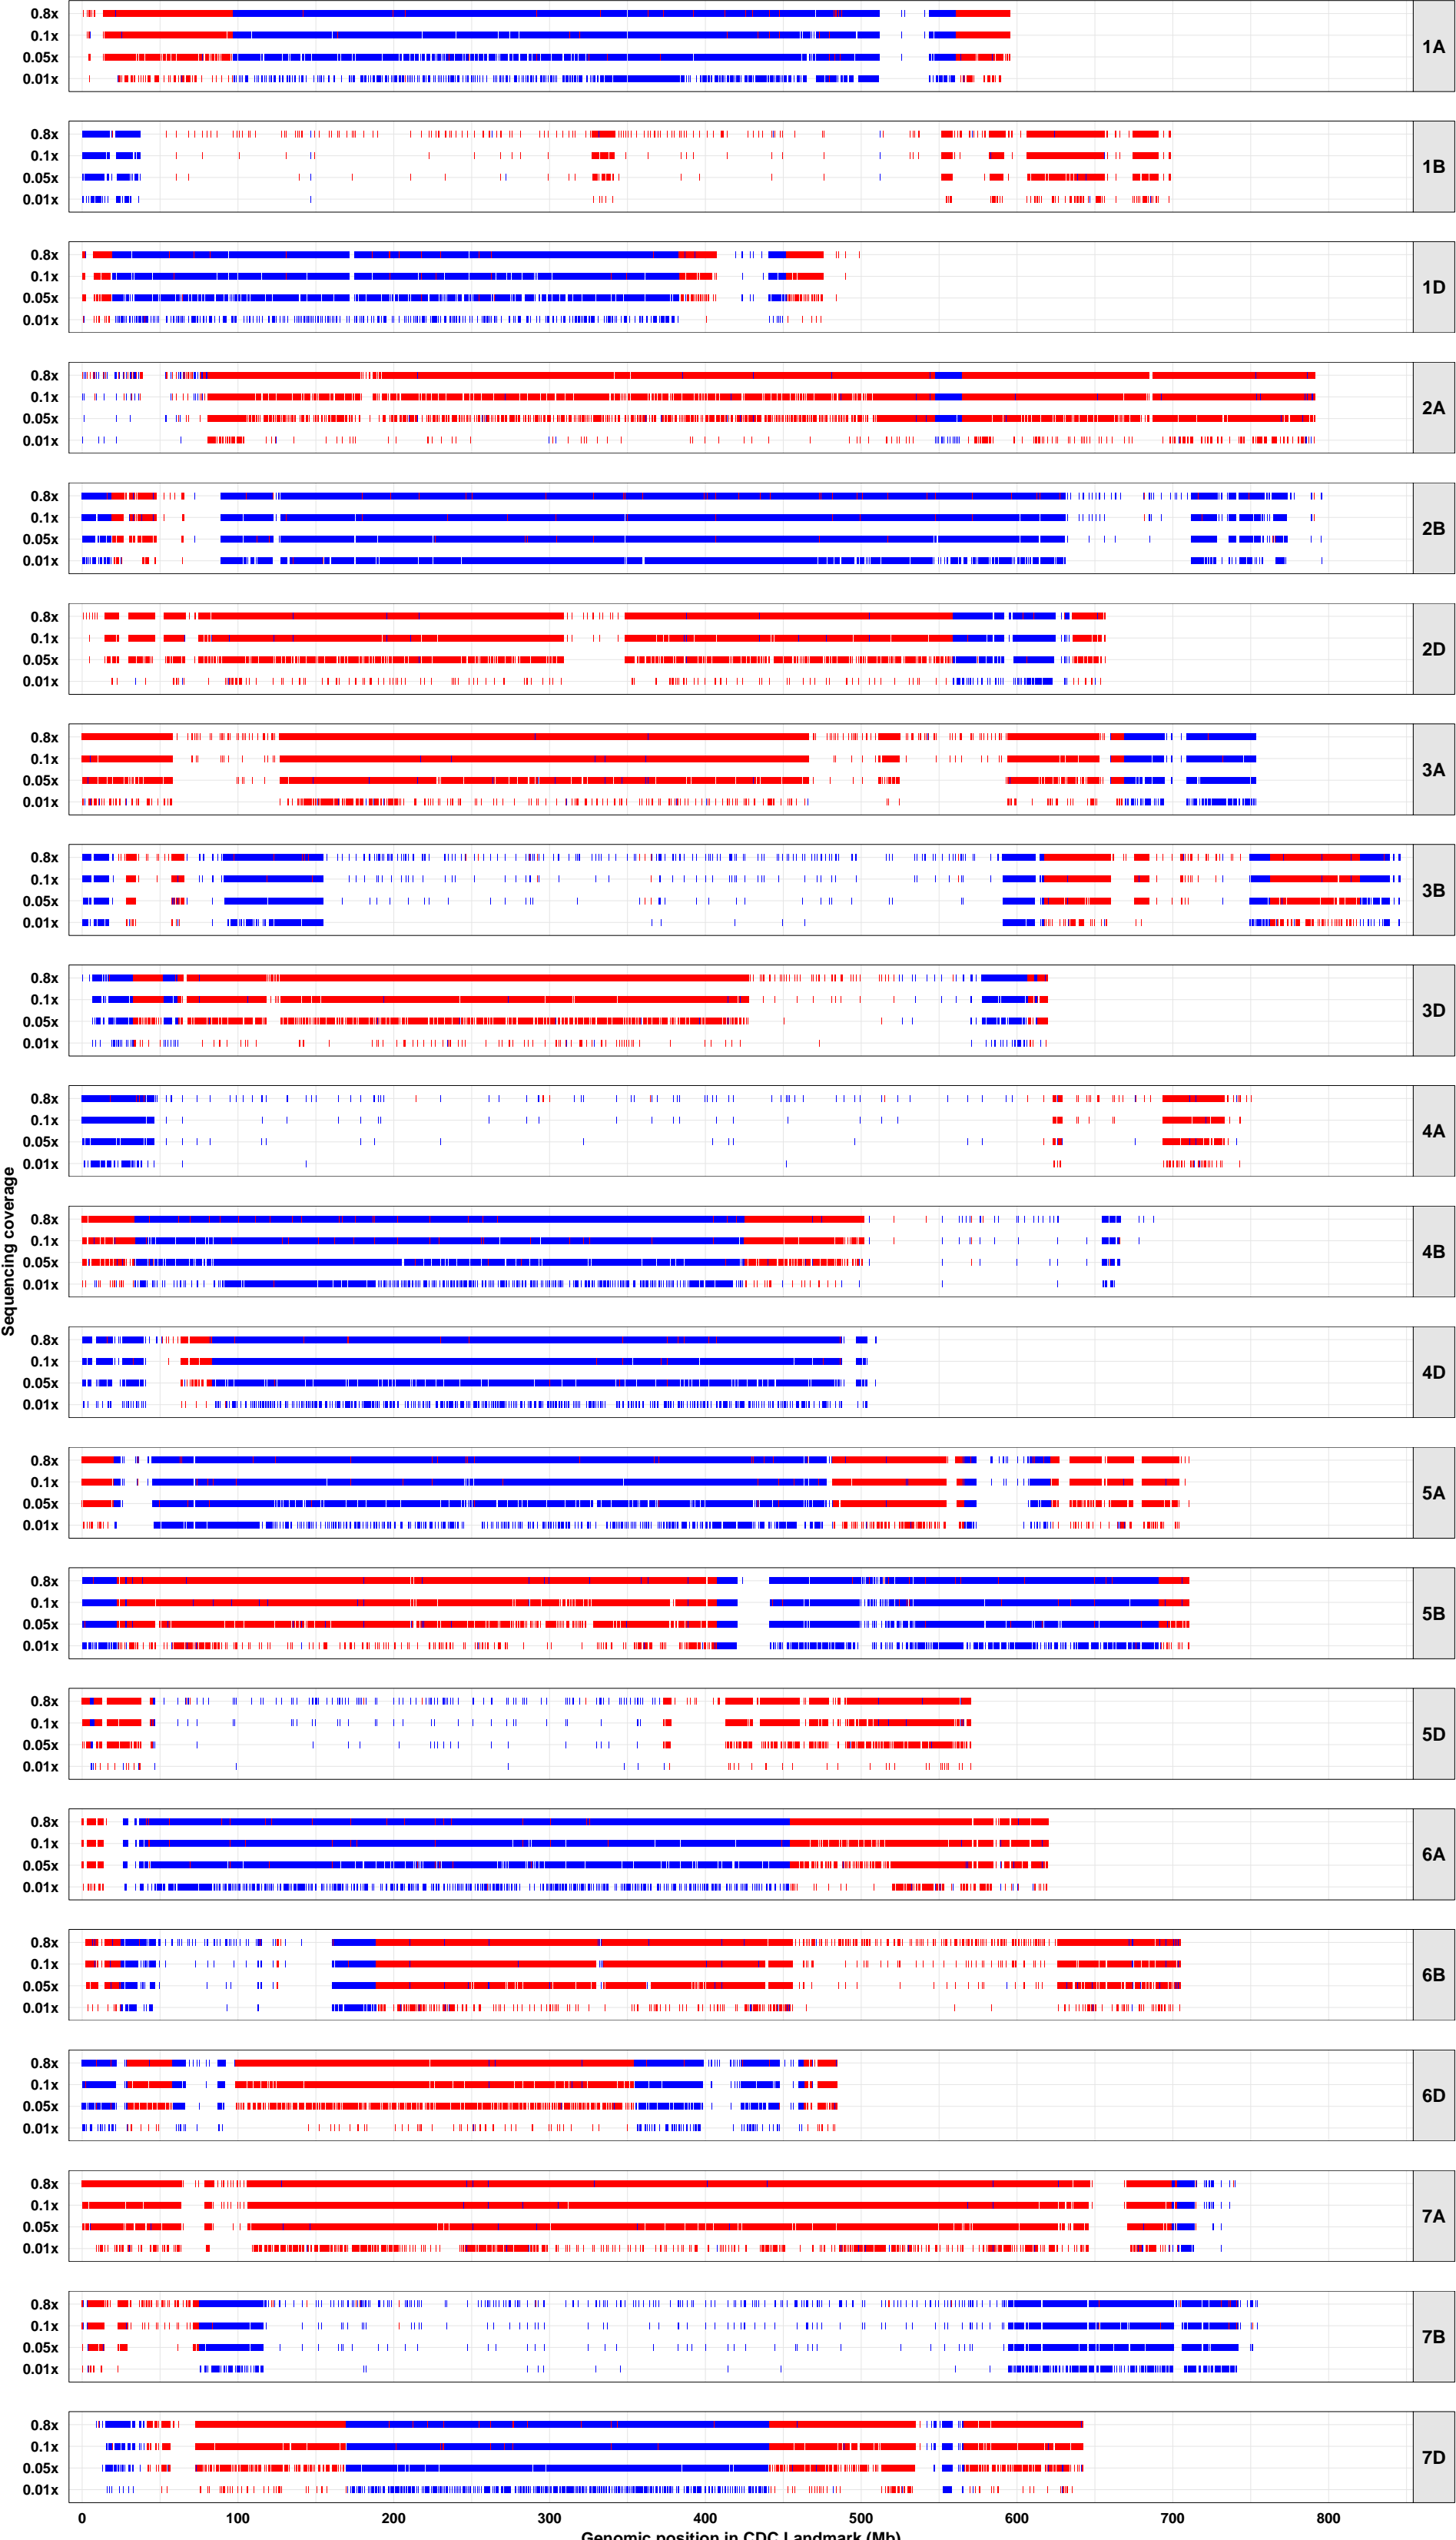

Supplement: Supplementary file 34 [file StanleyLandmarkDH01097-0.pdf › Supplementary-Figure-S3_StanleyLandmarkDH/StanleyLandmarkDH01097-0.pdf]

StanleyLandmarkDH01099-0

CDC Landmark CDC Stanley

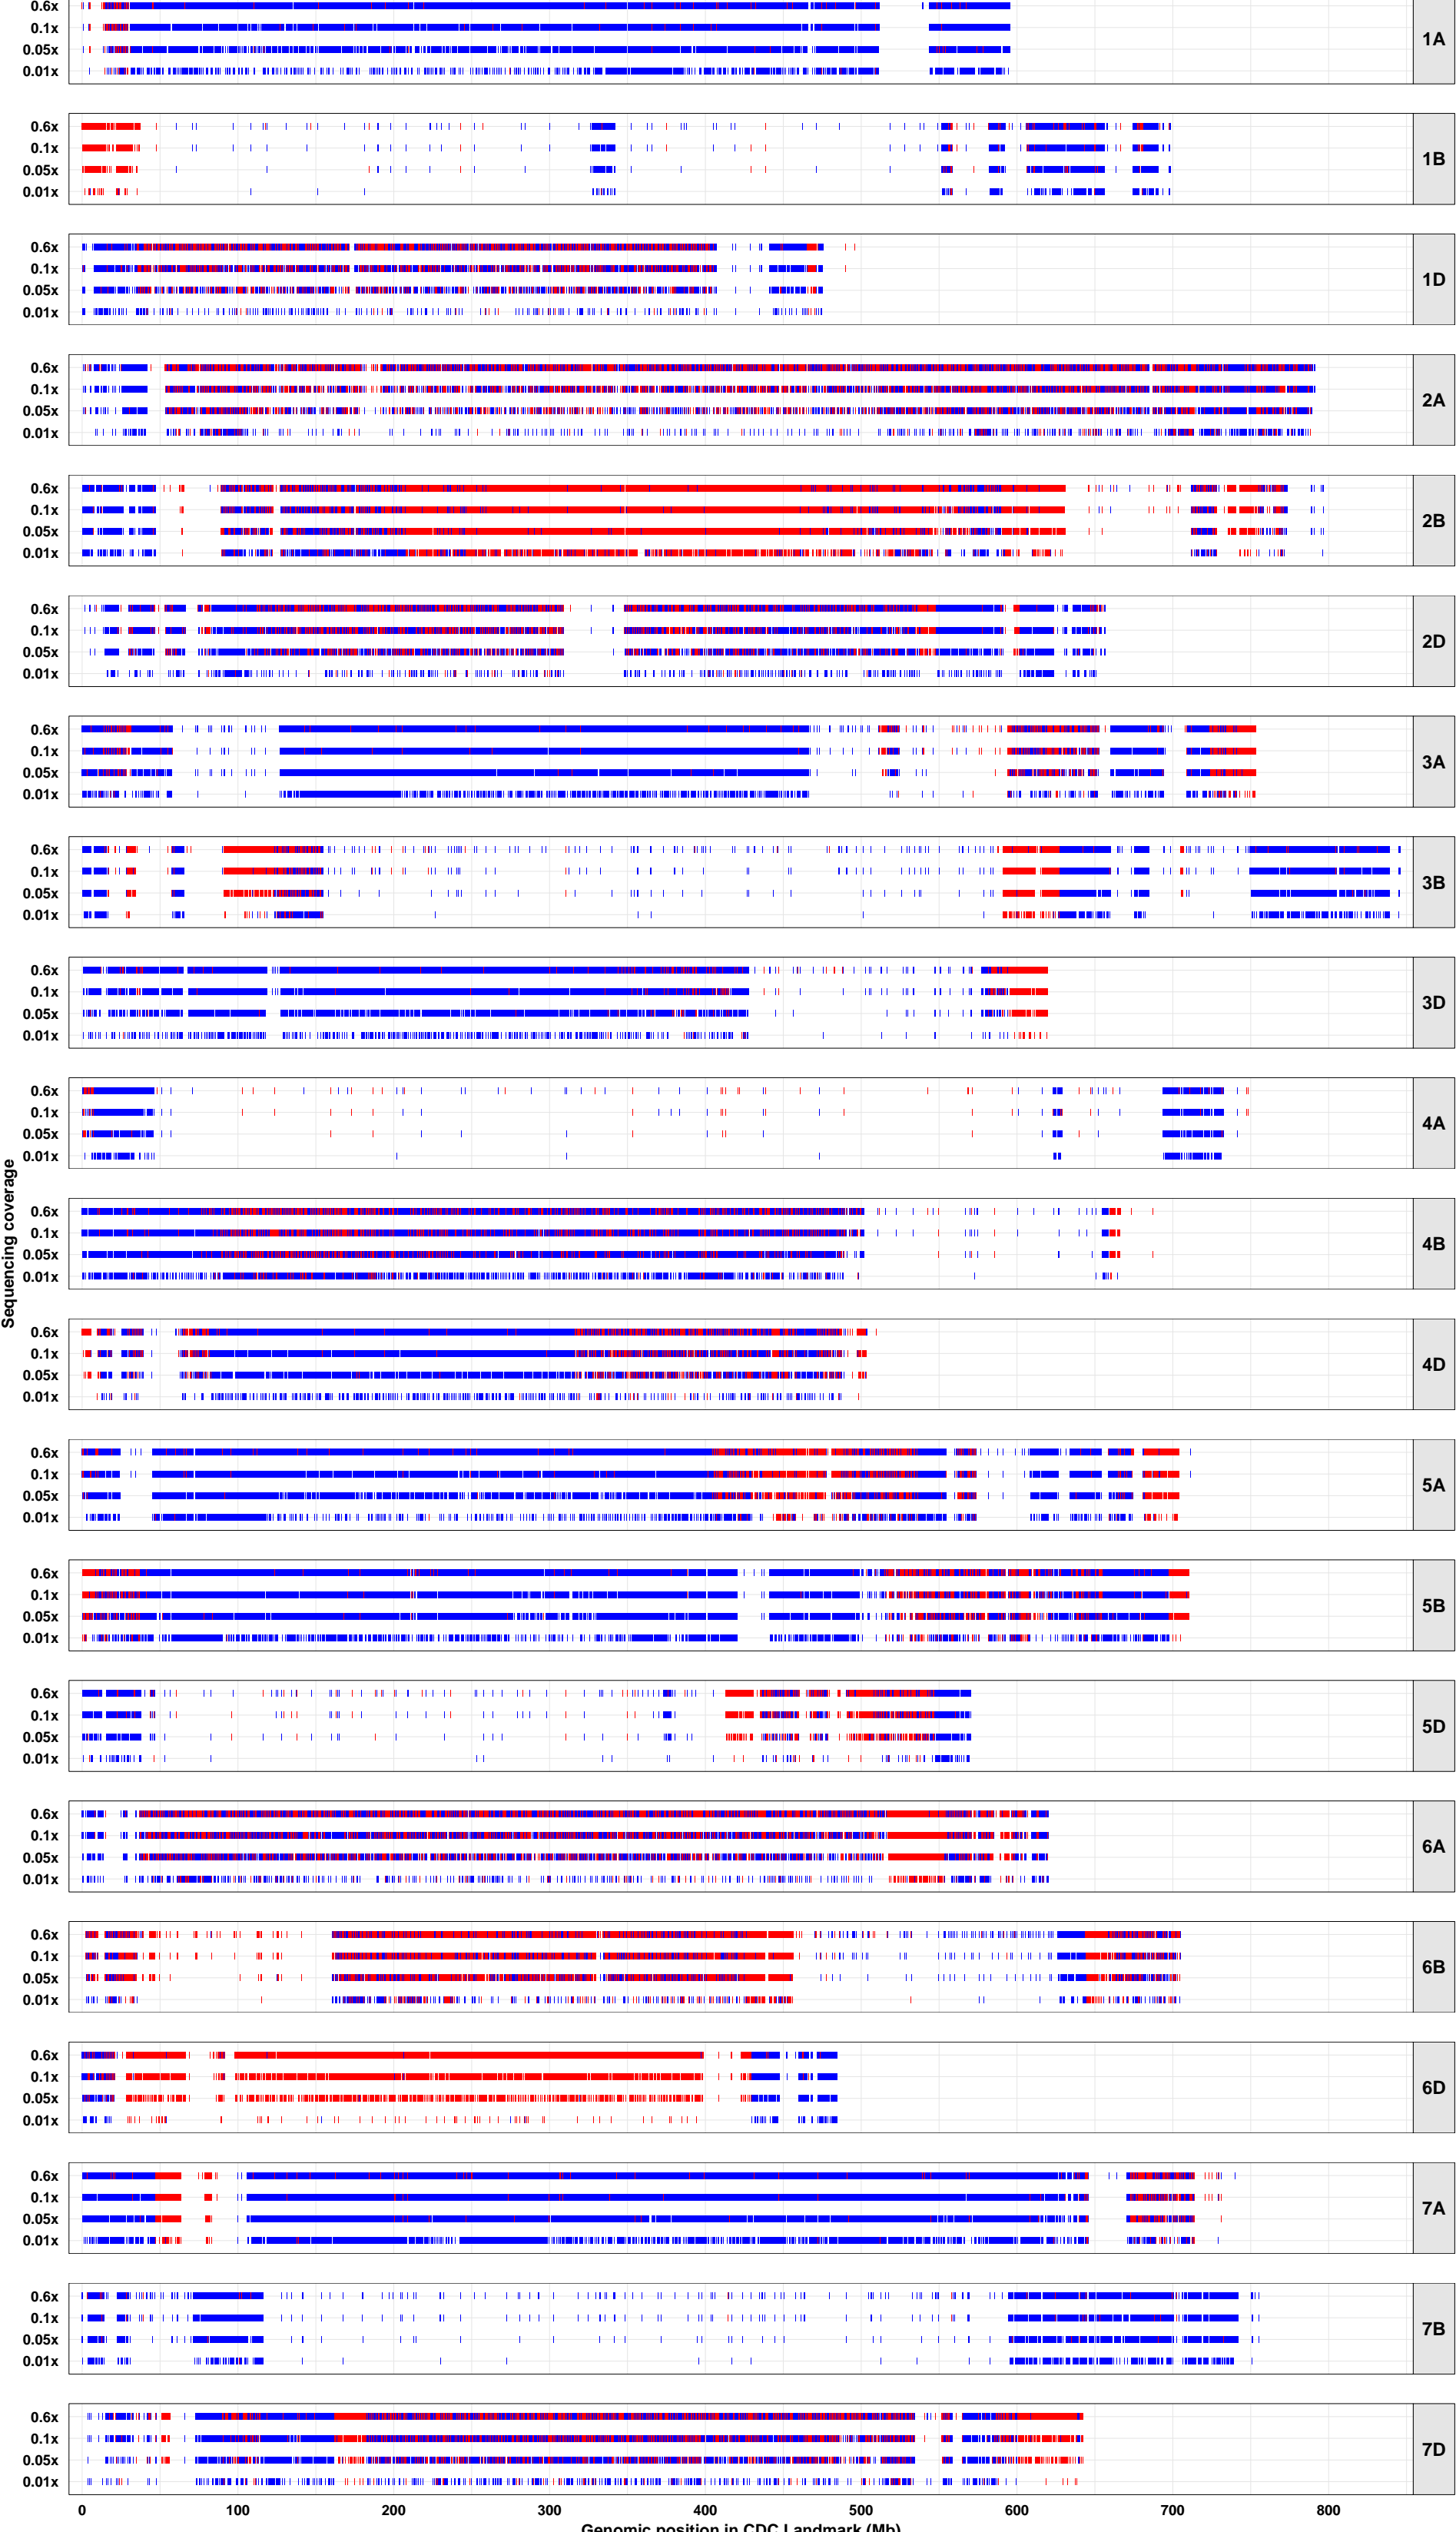

Supplement: Supplementary file 35 [file StanleyLandmarkDH01099-0.pdf › Supplementary-Figure-S3_StanleyLandmarkDH/StanleyLandmarkDH01099-0.pdf]

StanleyLandmarkDH01100-0

CDC Landmark CDC Stanley

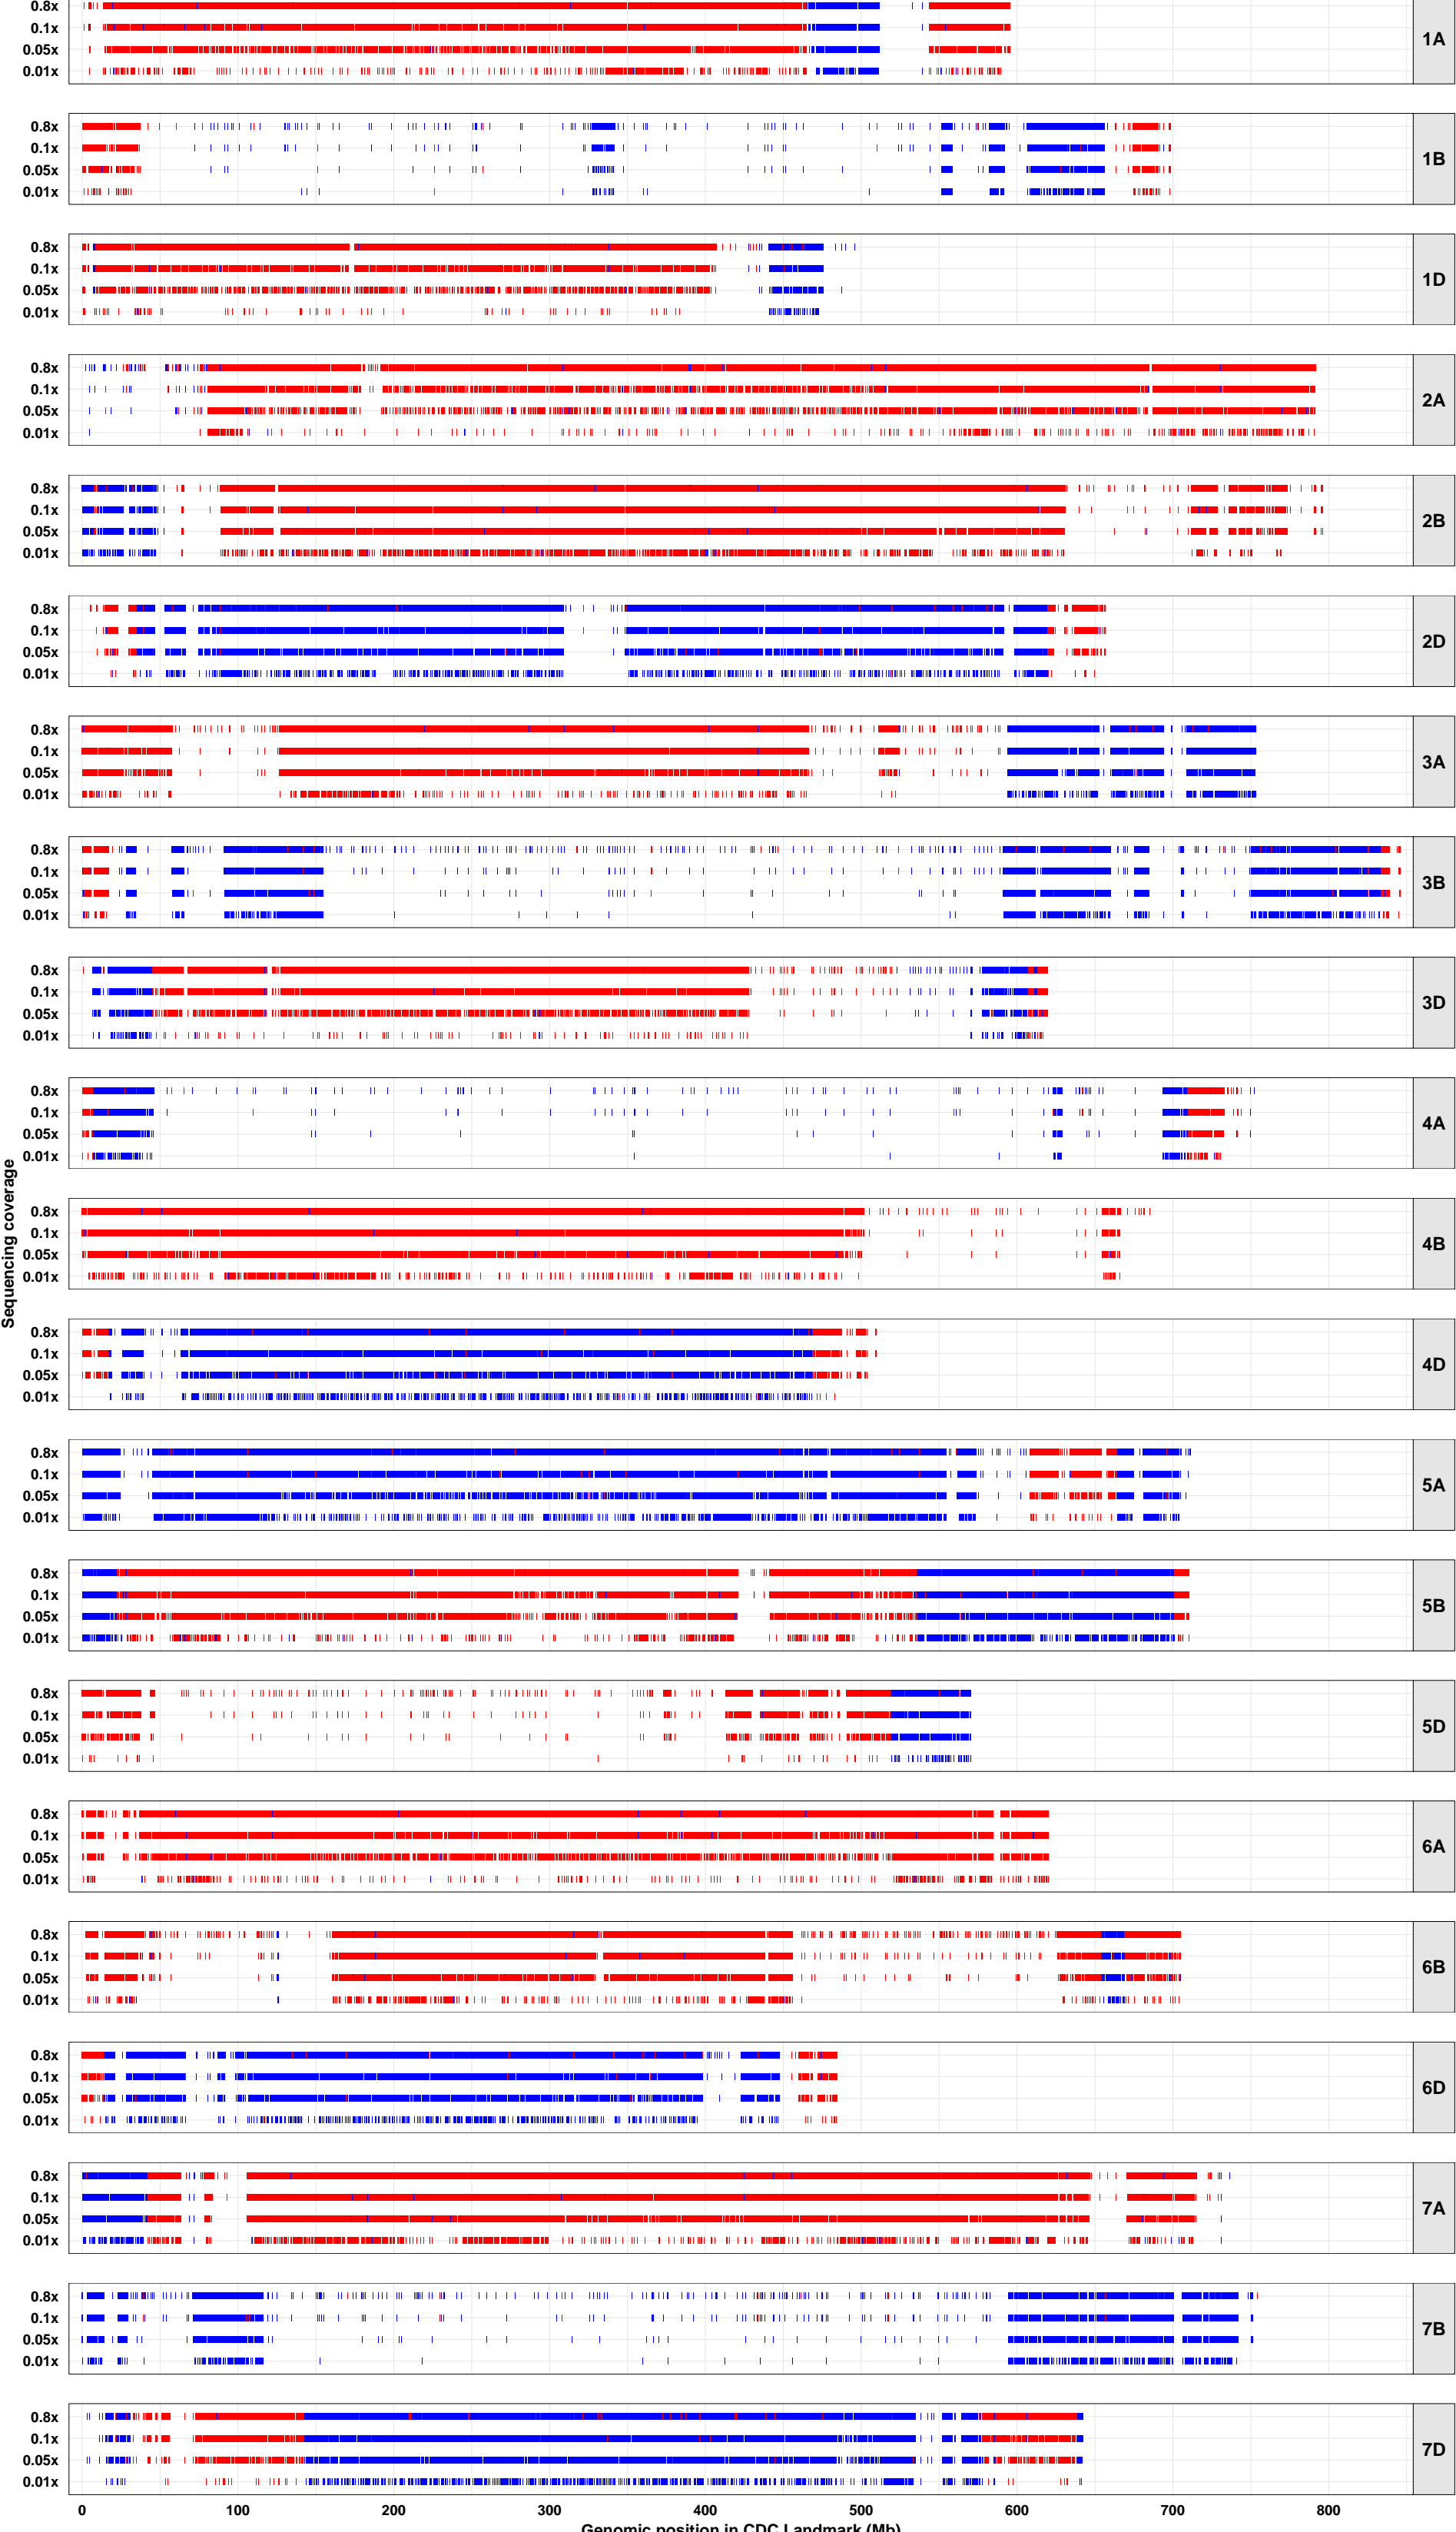

Supplement: Supplementary file 36 [file StanleyLandmarkDH01100-0.pdf › Supplementary-Figure-S3_StanleyLandmarkDH/StanleyLandmarkDH01100-0.pdf]

StanleyLandmarkDH01103-0

CDC Landmark CDC Stanley

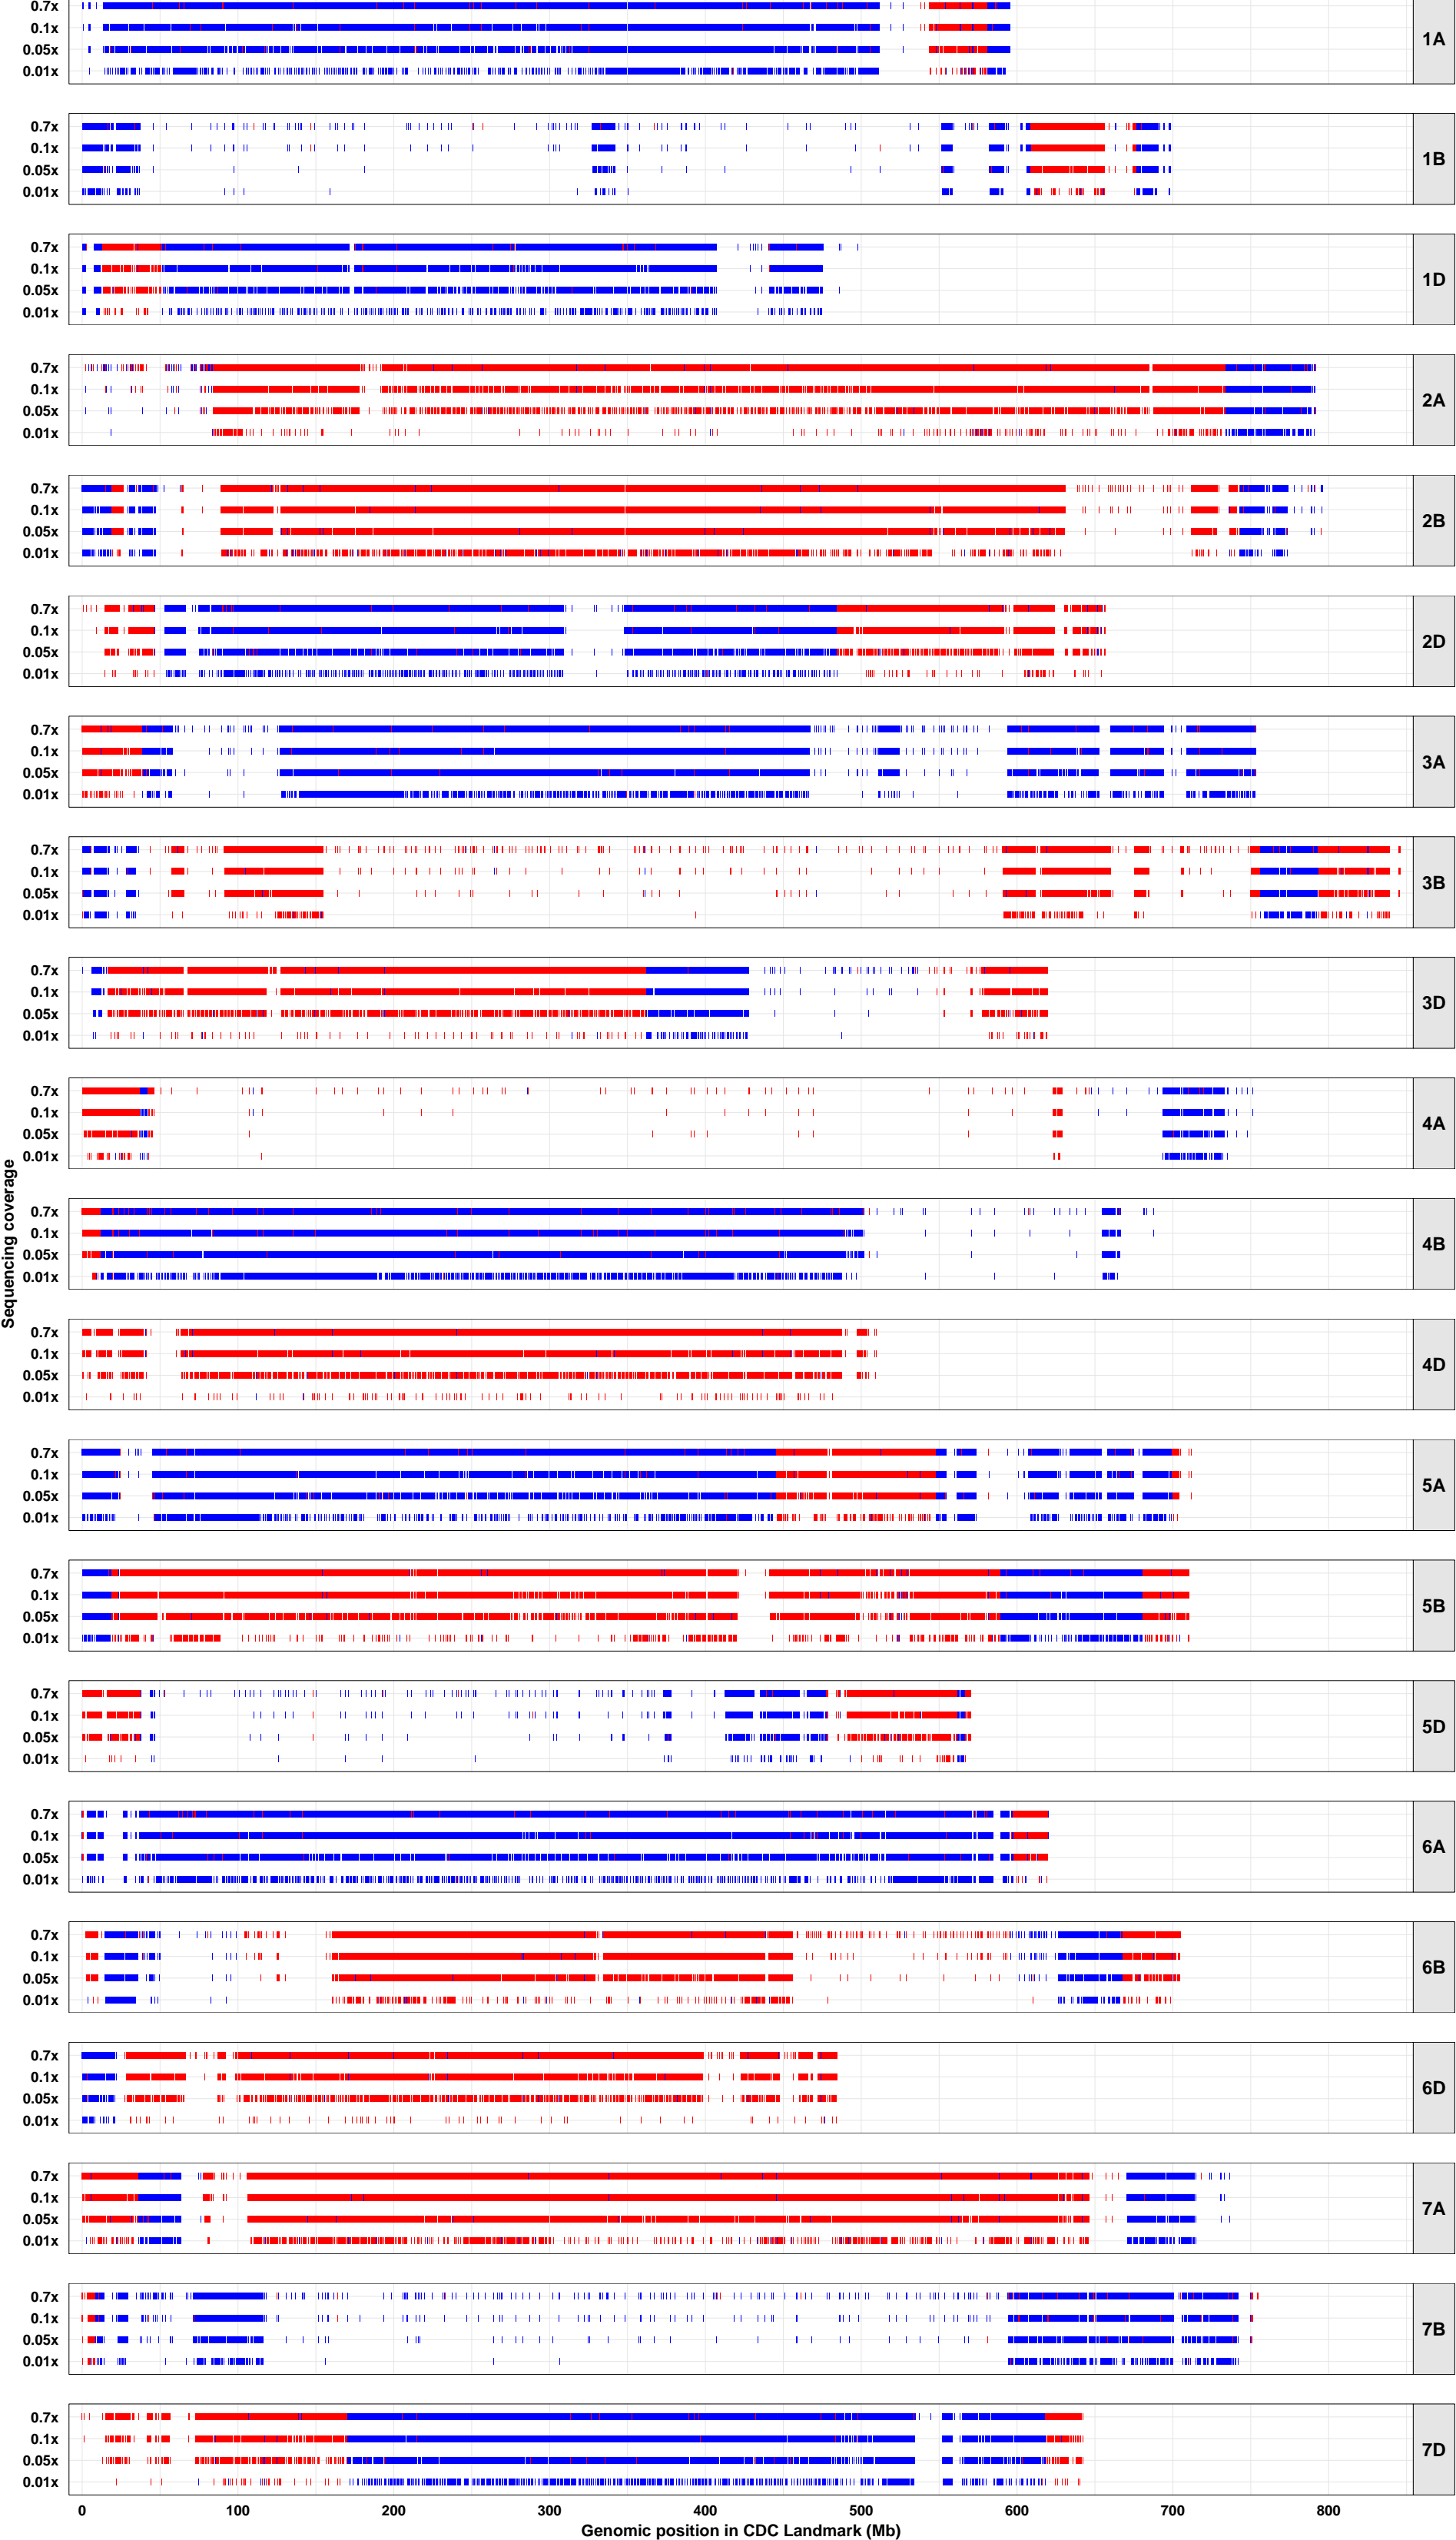

Supplement: Supplementary file 37 [file StanleyLandmarkDH01103-0.pdf › Supplementary-Figure-S3_StanleyLandmarkDH/StanleyLandmarkDH01103-0.pdf]

StanleyLandmarkDH01106-0

CDC Landmark CDC Stanley

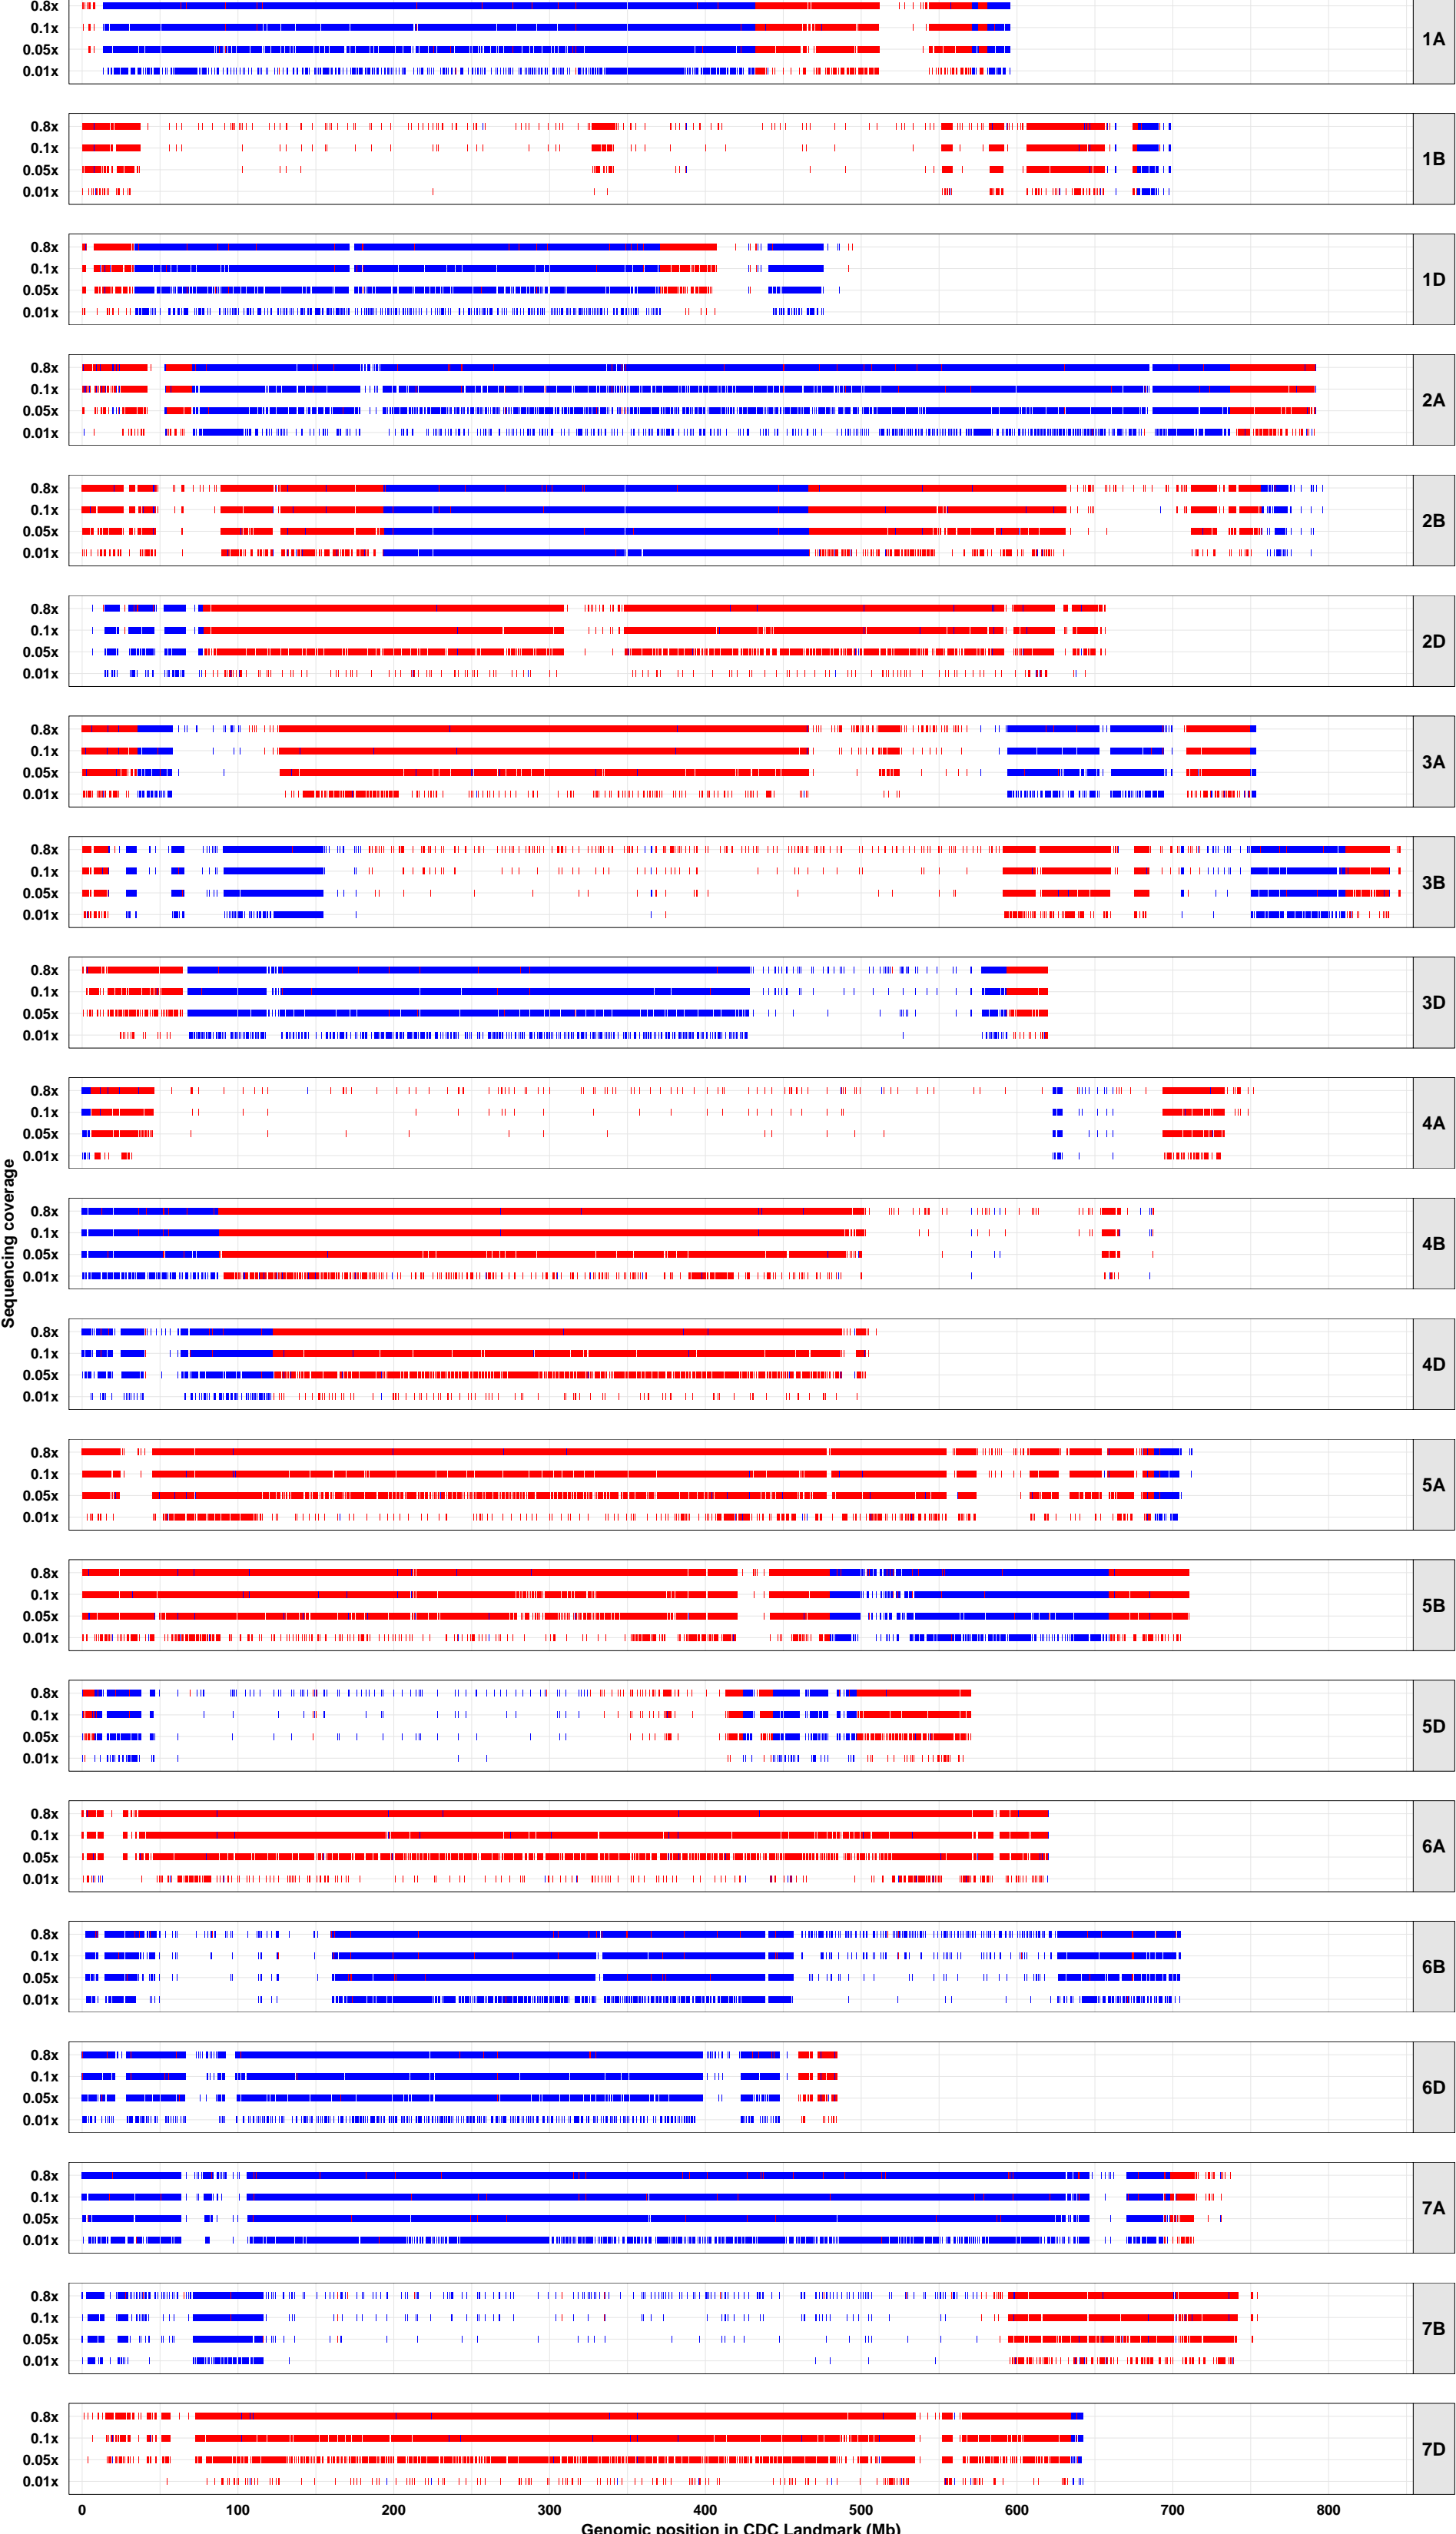

Supplement: Supplementary file 38 [file StanleyLandmarkDH01106-0.pdf › Supplementary-Figure-S3_StanleyLandmarkDH/StanleyLandmarkDH01106-0.pdf]

StanleyLandmarkDH01108-0

CDC Landmark CDC Stanley

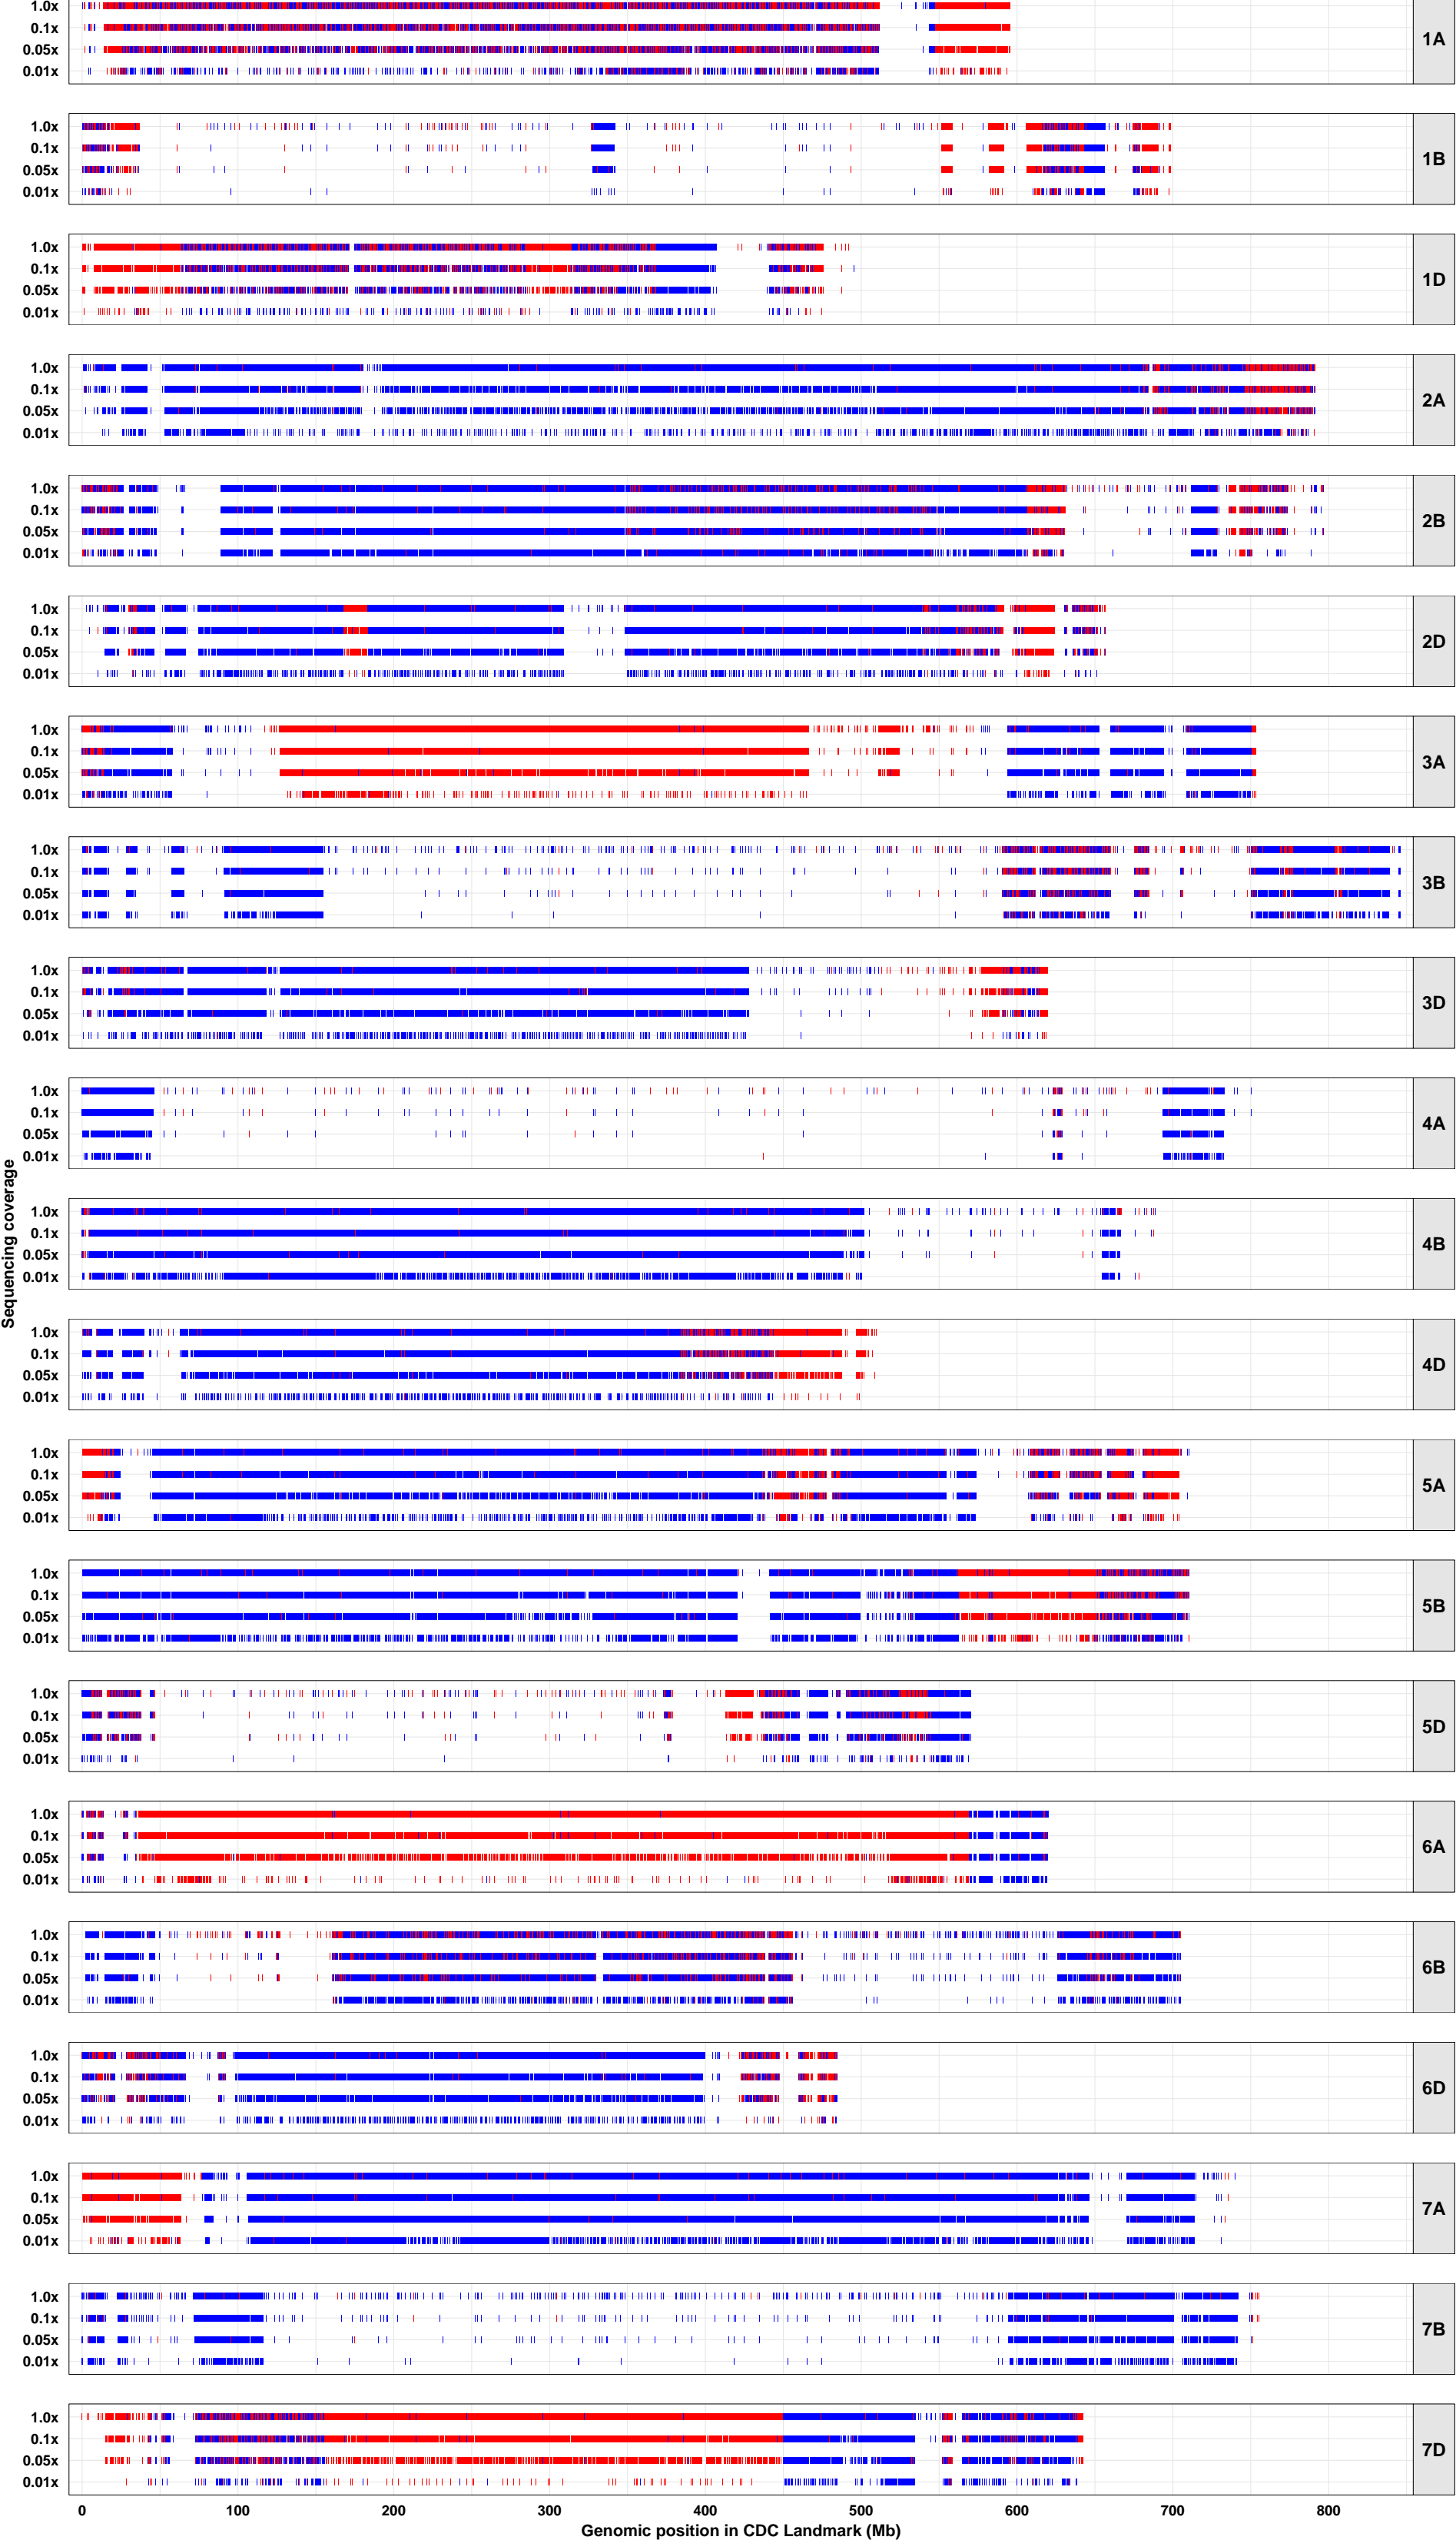

Supplement: Supplementary file 39 [file StanleyLandmarkDH01108-0.pdf › Supplementary-Figure-S3_StanleyLandmarkDH/StanleyLandmarkDH01108-0.pdf]

StanleyLandmarkDH01111-0

CDC Landmark CDC Stanley

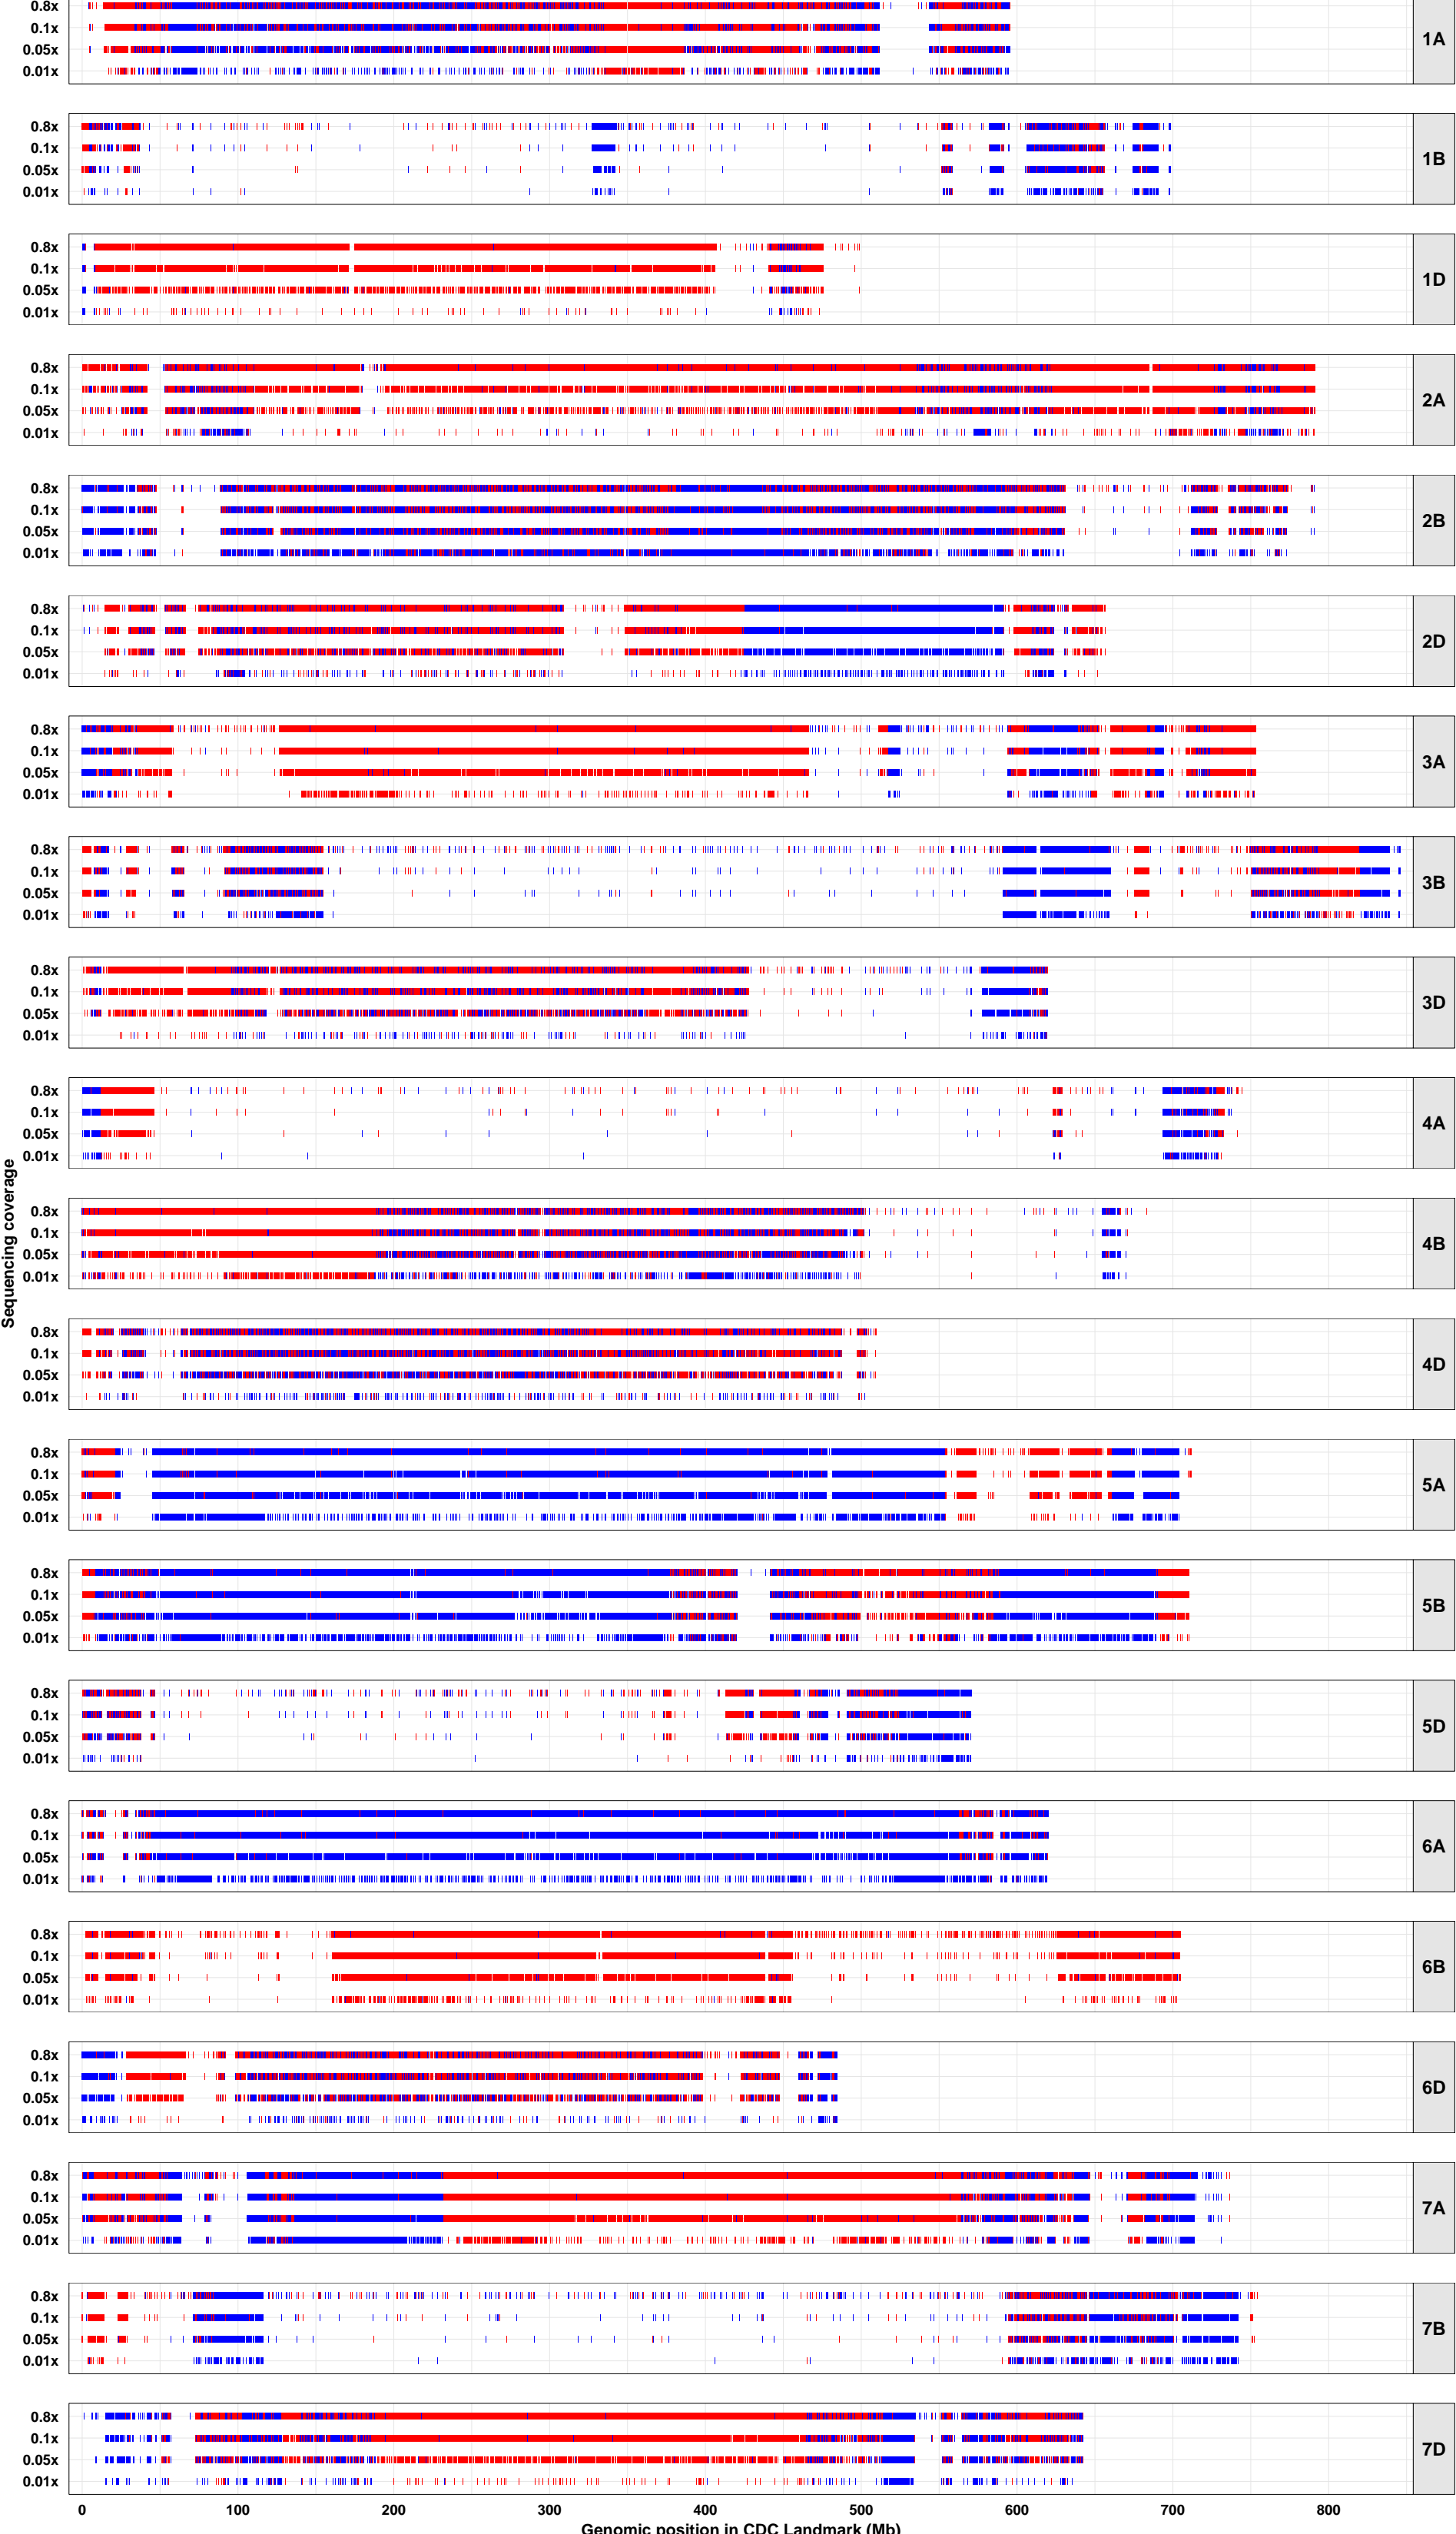

Supplement: Supplementary file 40 [file StanleyLandmarkDH01111-0.pdf › Supplementary-Figure-S3_StanleyLandmarkDH/StanleyLandmarkDH01111-0.pdf]

StanleyLandmarkDH02001-0

CDC Landmark CDC Stanley

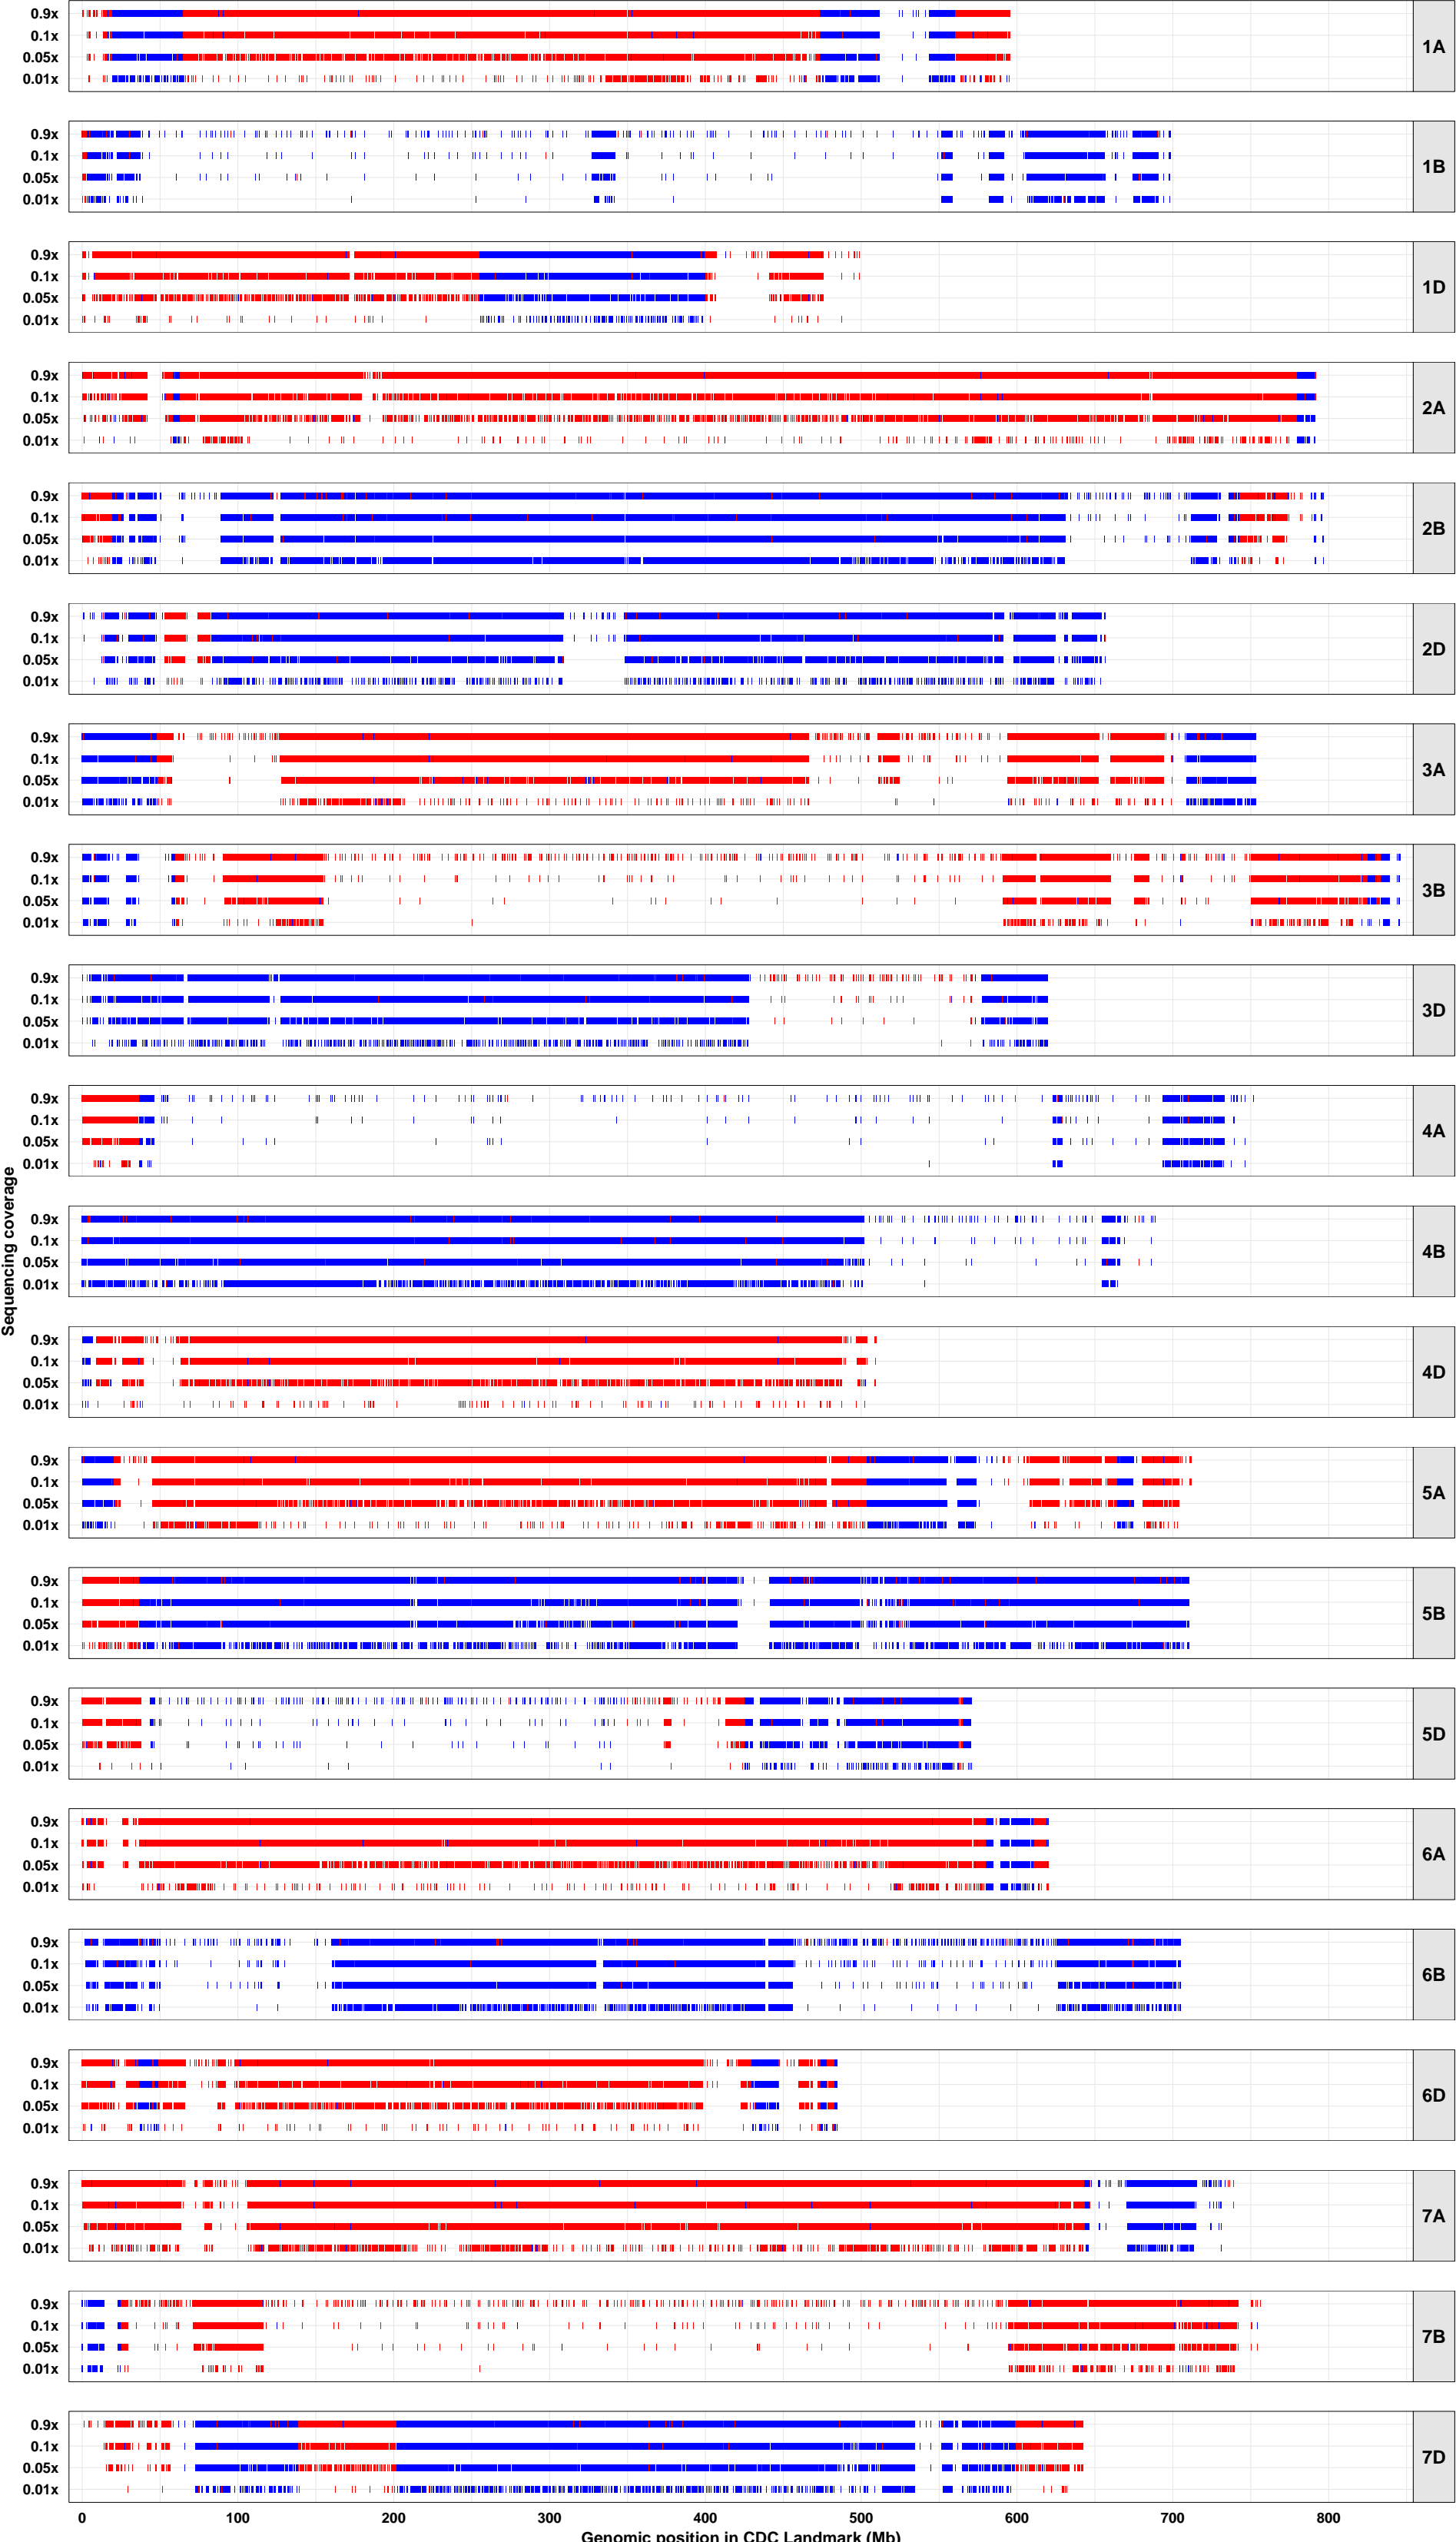

Supplement: Supplementary file 41 [file StanleyLandmarkDH02001-0.pdf › Supplementary-Figure-S3_StanleyLandmarkDH/StanleyLandmarkDH02001-0.pdf]

StanleyLandmarkDH02007-0

CDC Landmark CDC Stanley

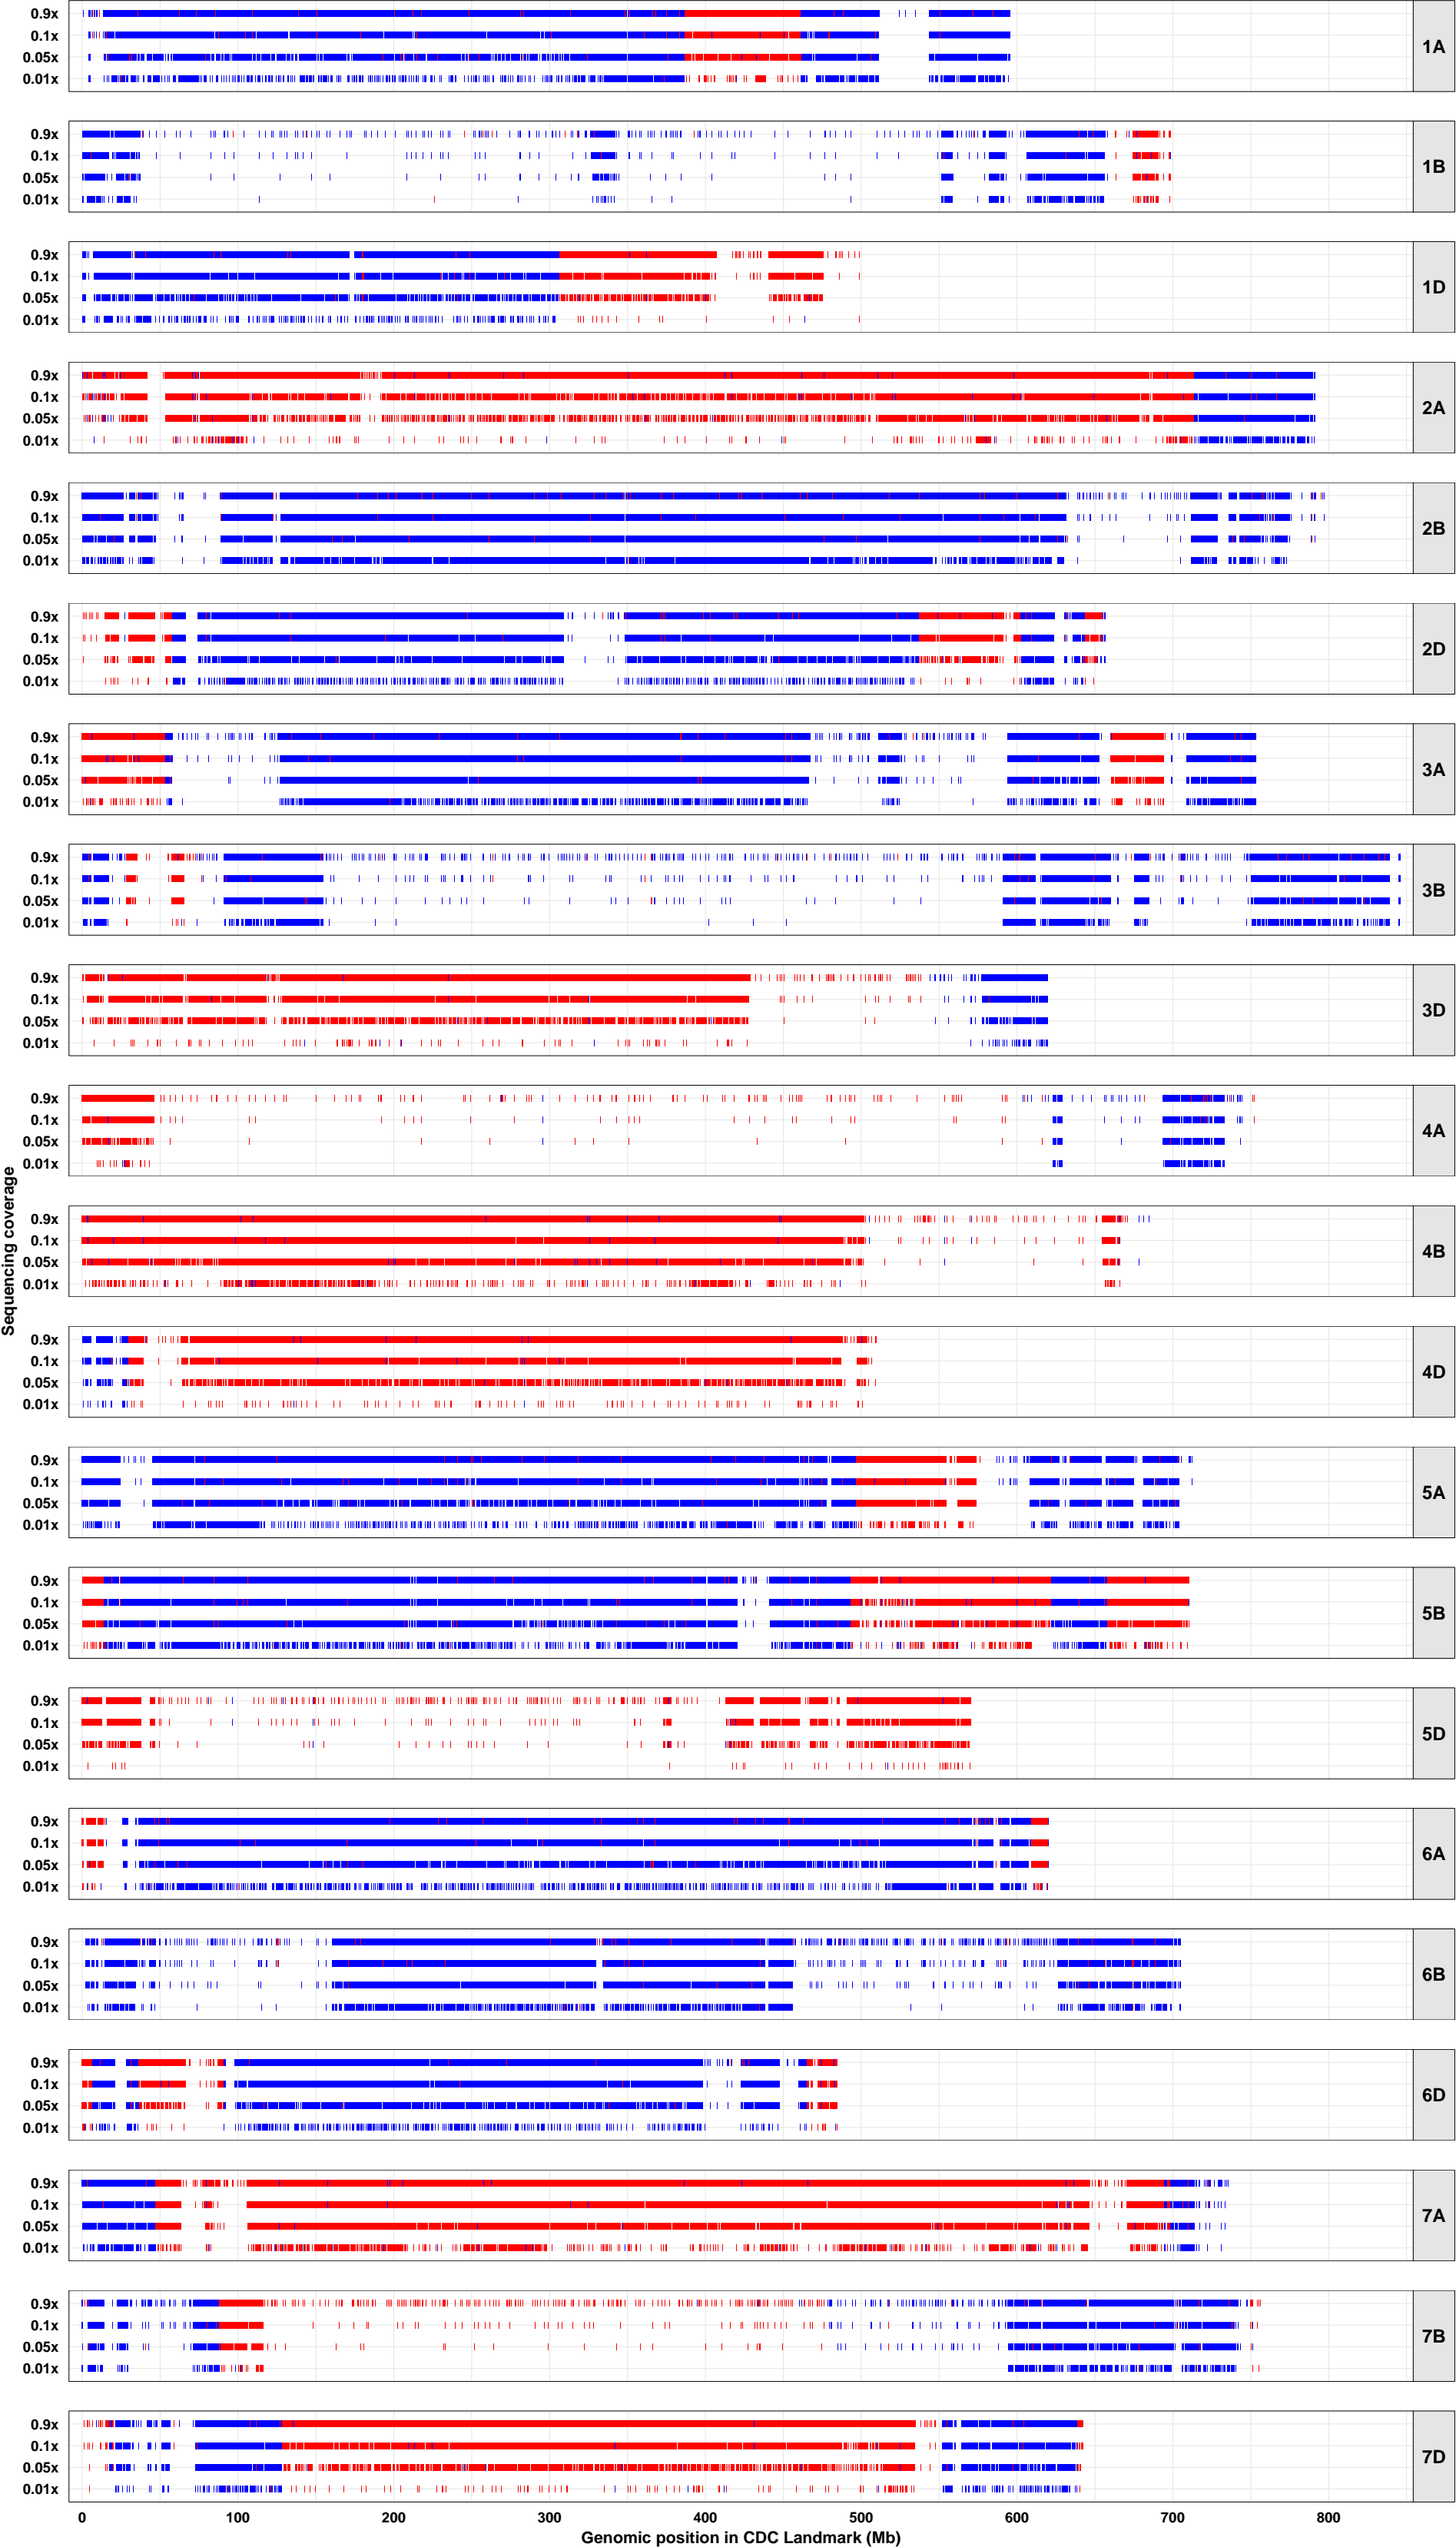

Supplement: Supplementary file 42 [file StanleyLandmarkDH02007-0.pdf › Supplementary-Figure-S3_StanleyLandmarkDH/StanleyLandmarkDH02007-0.pdf]

StanleyLandmarkDH02008-0

CDC Landmark CDC Stanley

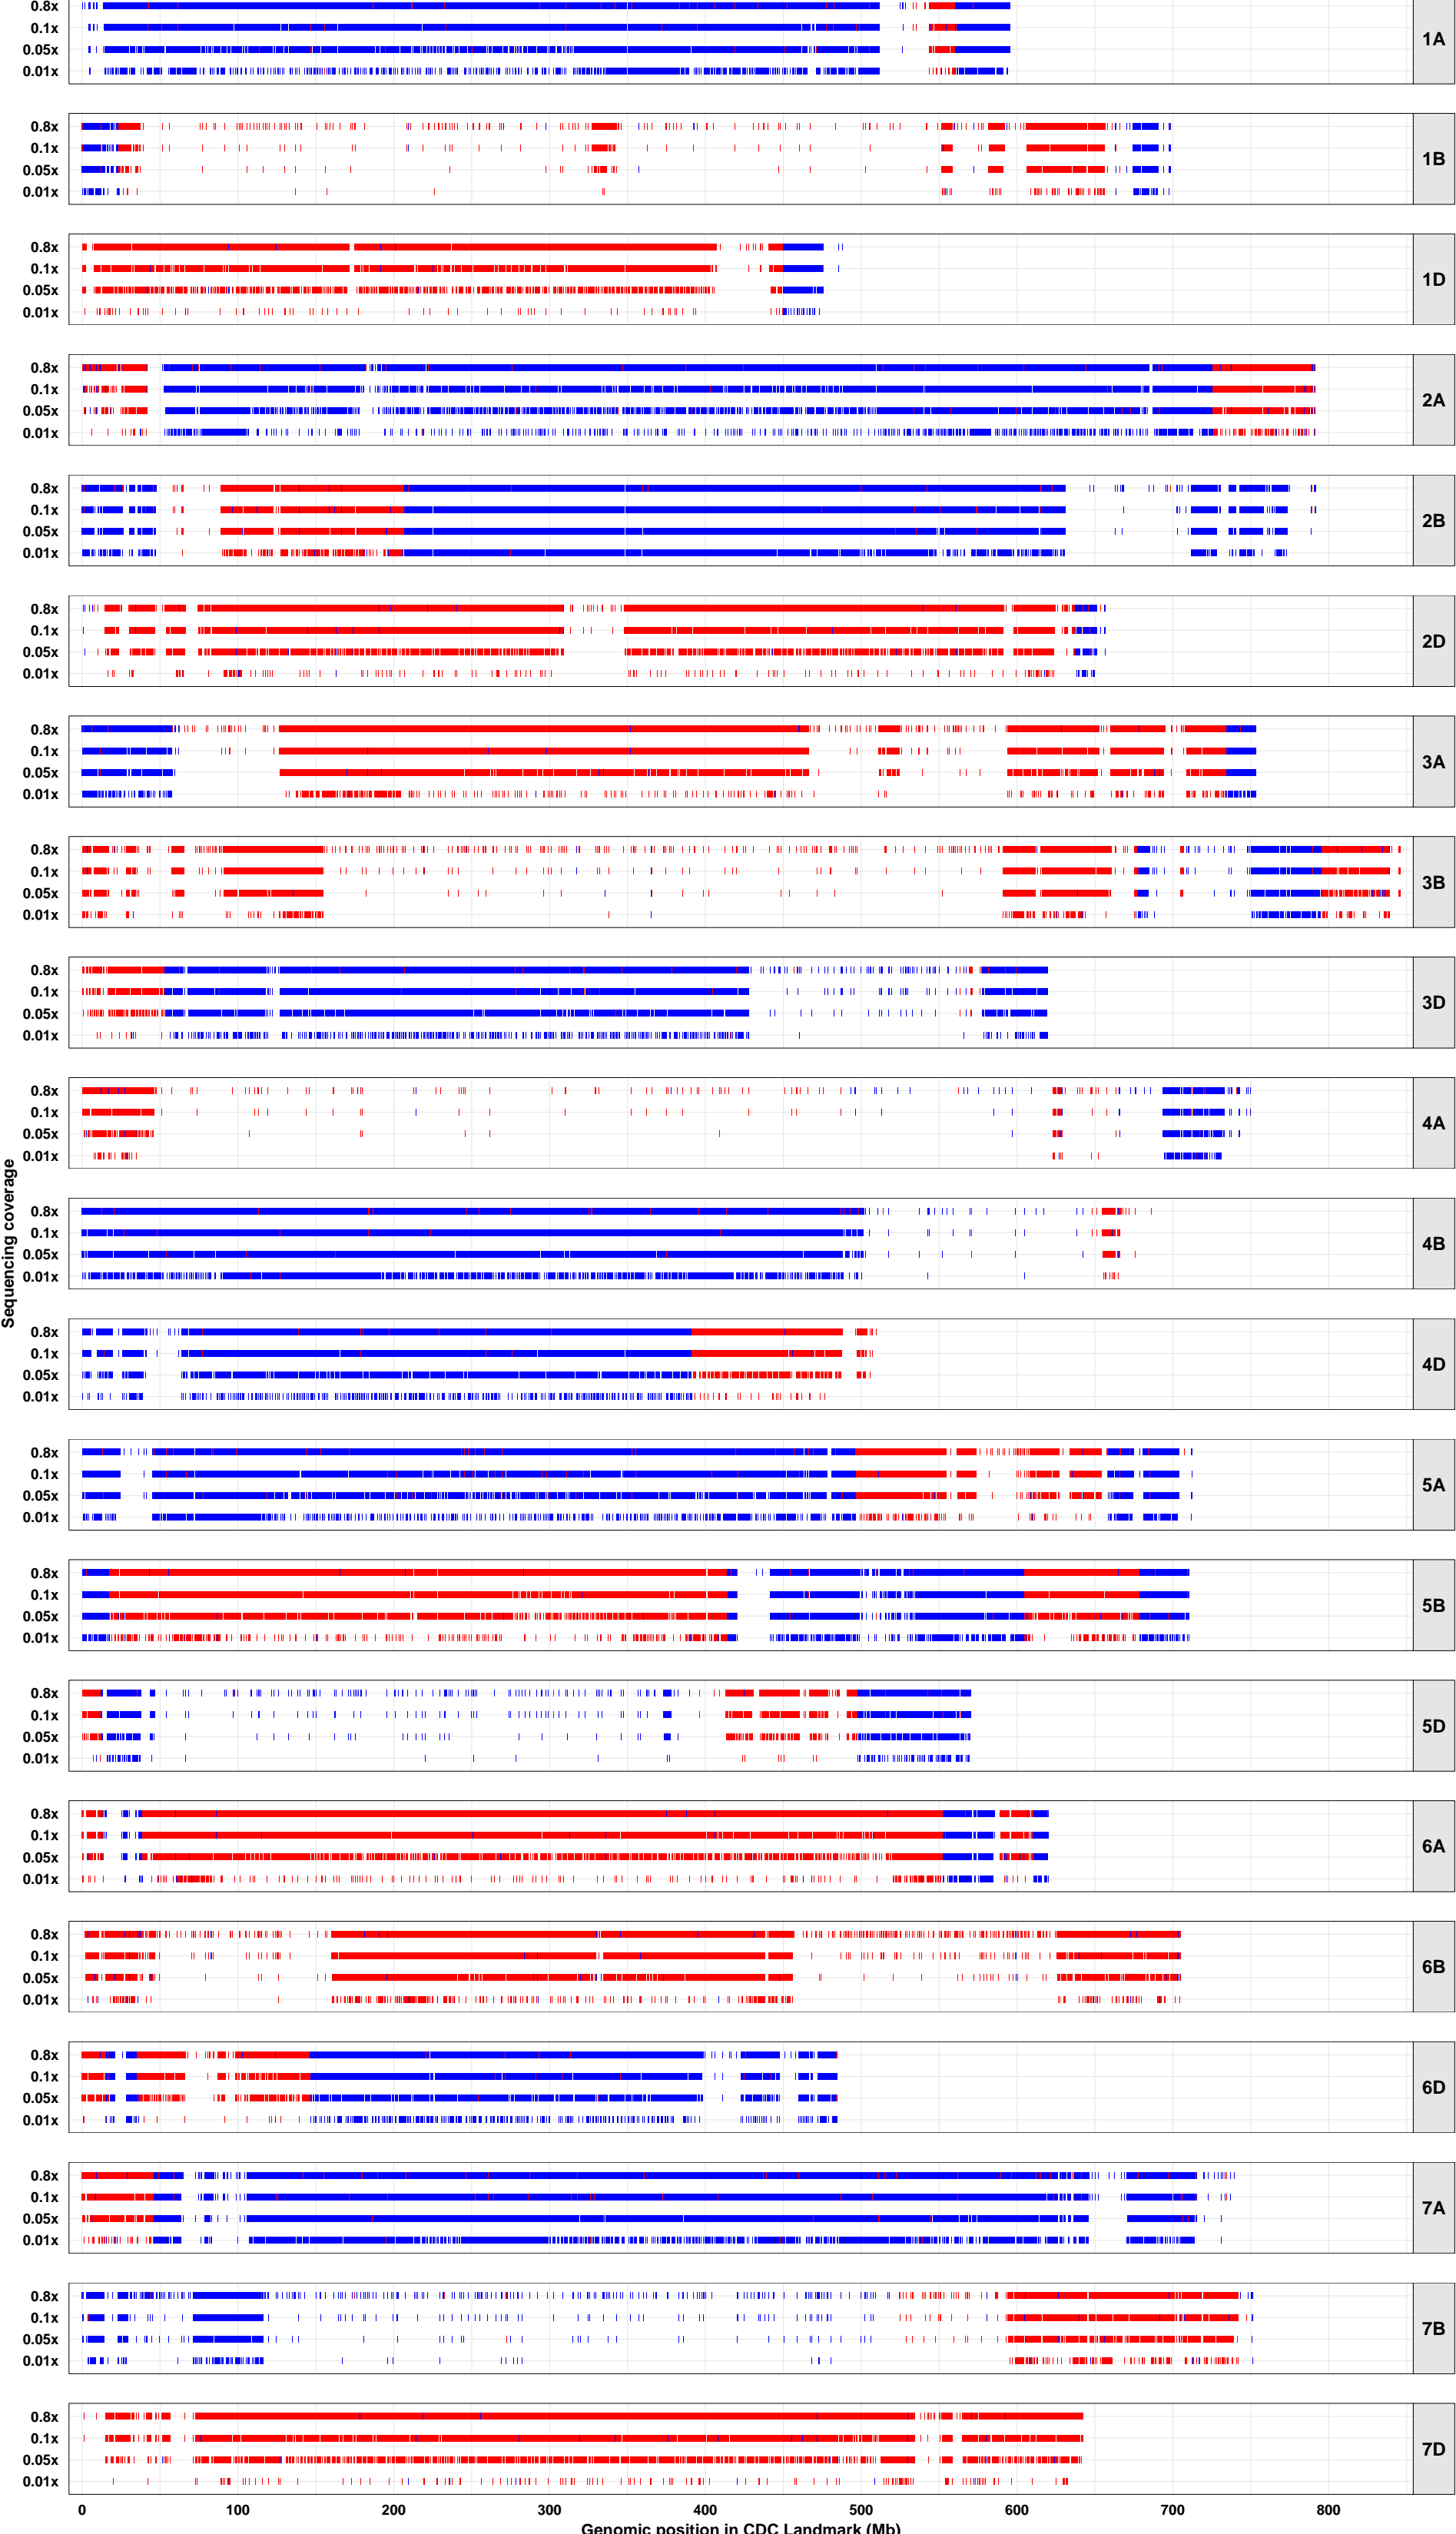

Supplement: Supplementary file 43 [file StanleyLandmarkDH02008-0.pdf › Supplementary-Figure-S3_StanleyLandmarkDH/StanleyLandmarkDH02008-0.pdf]

StanleyLandmarkKDHO2009-0

CDC Landmark CDC Stanley

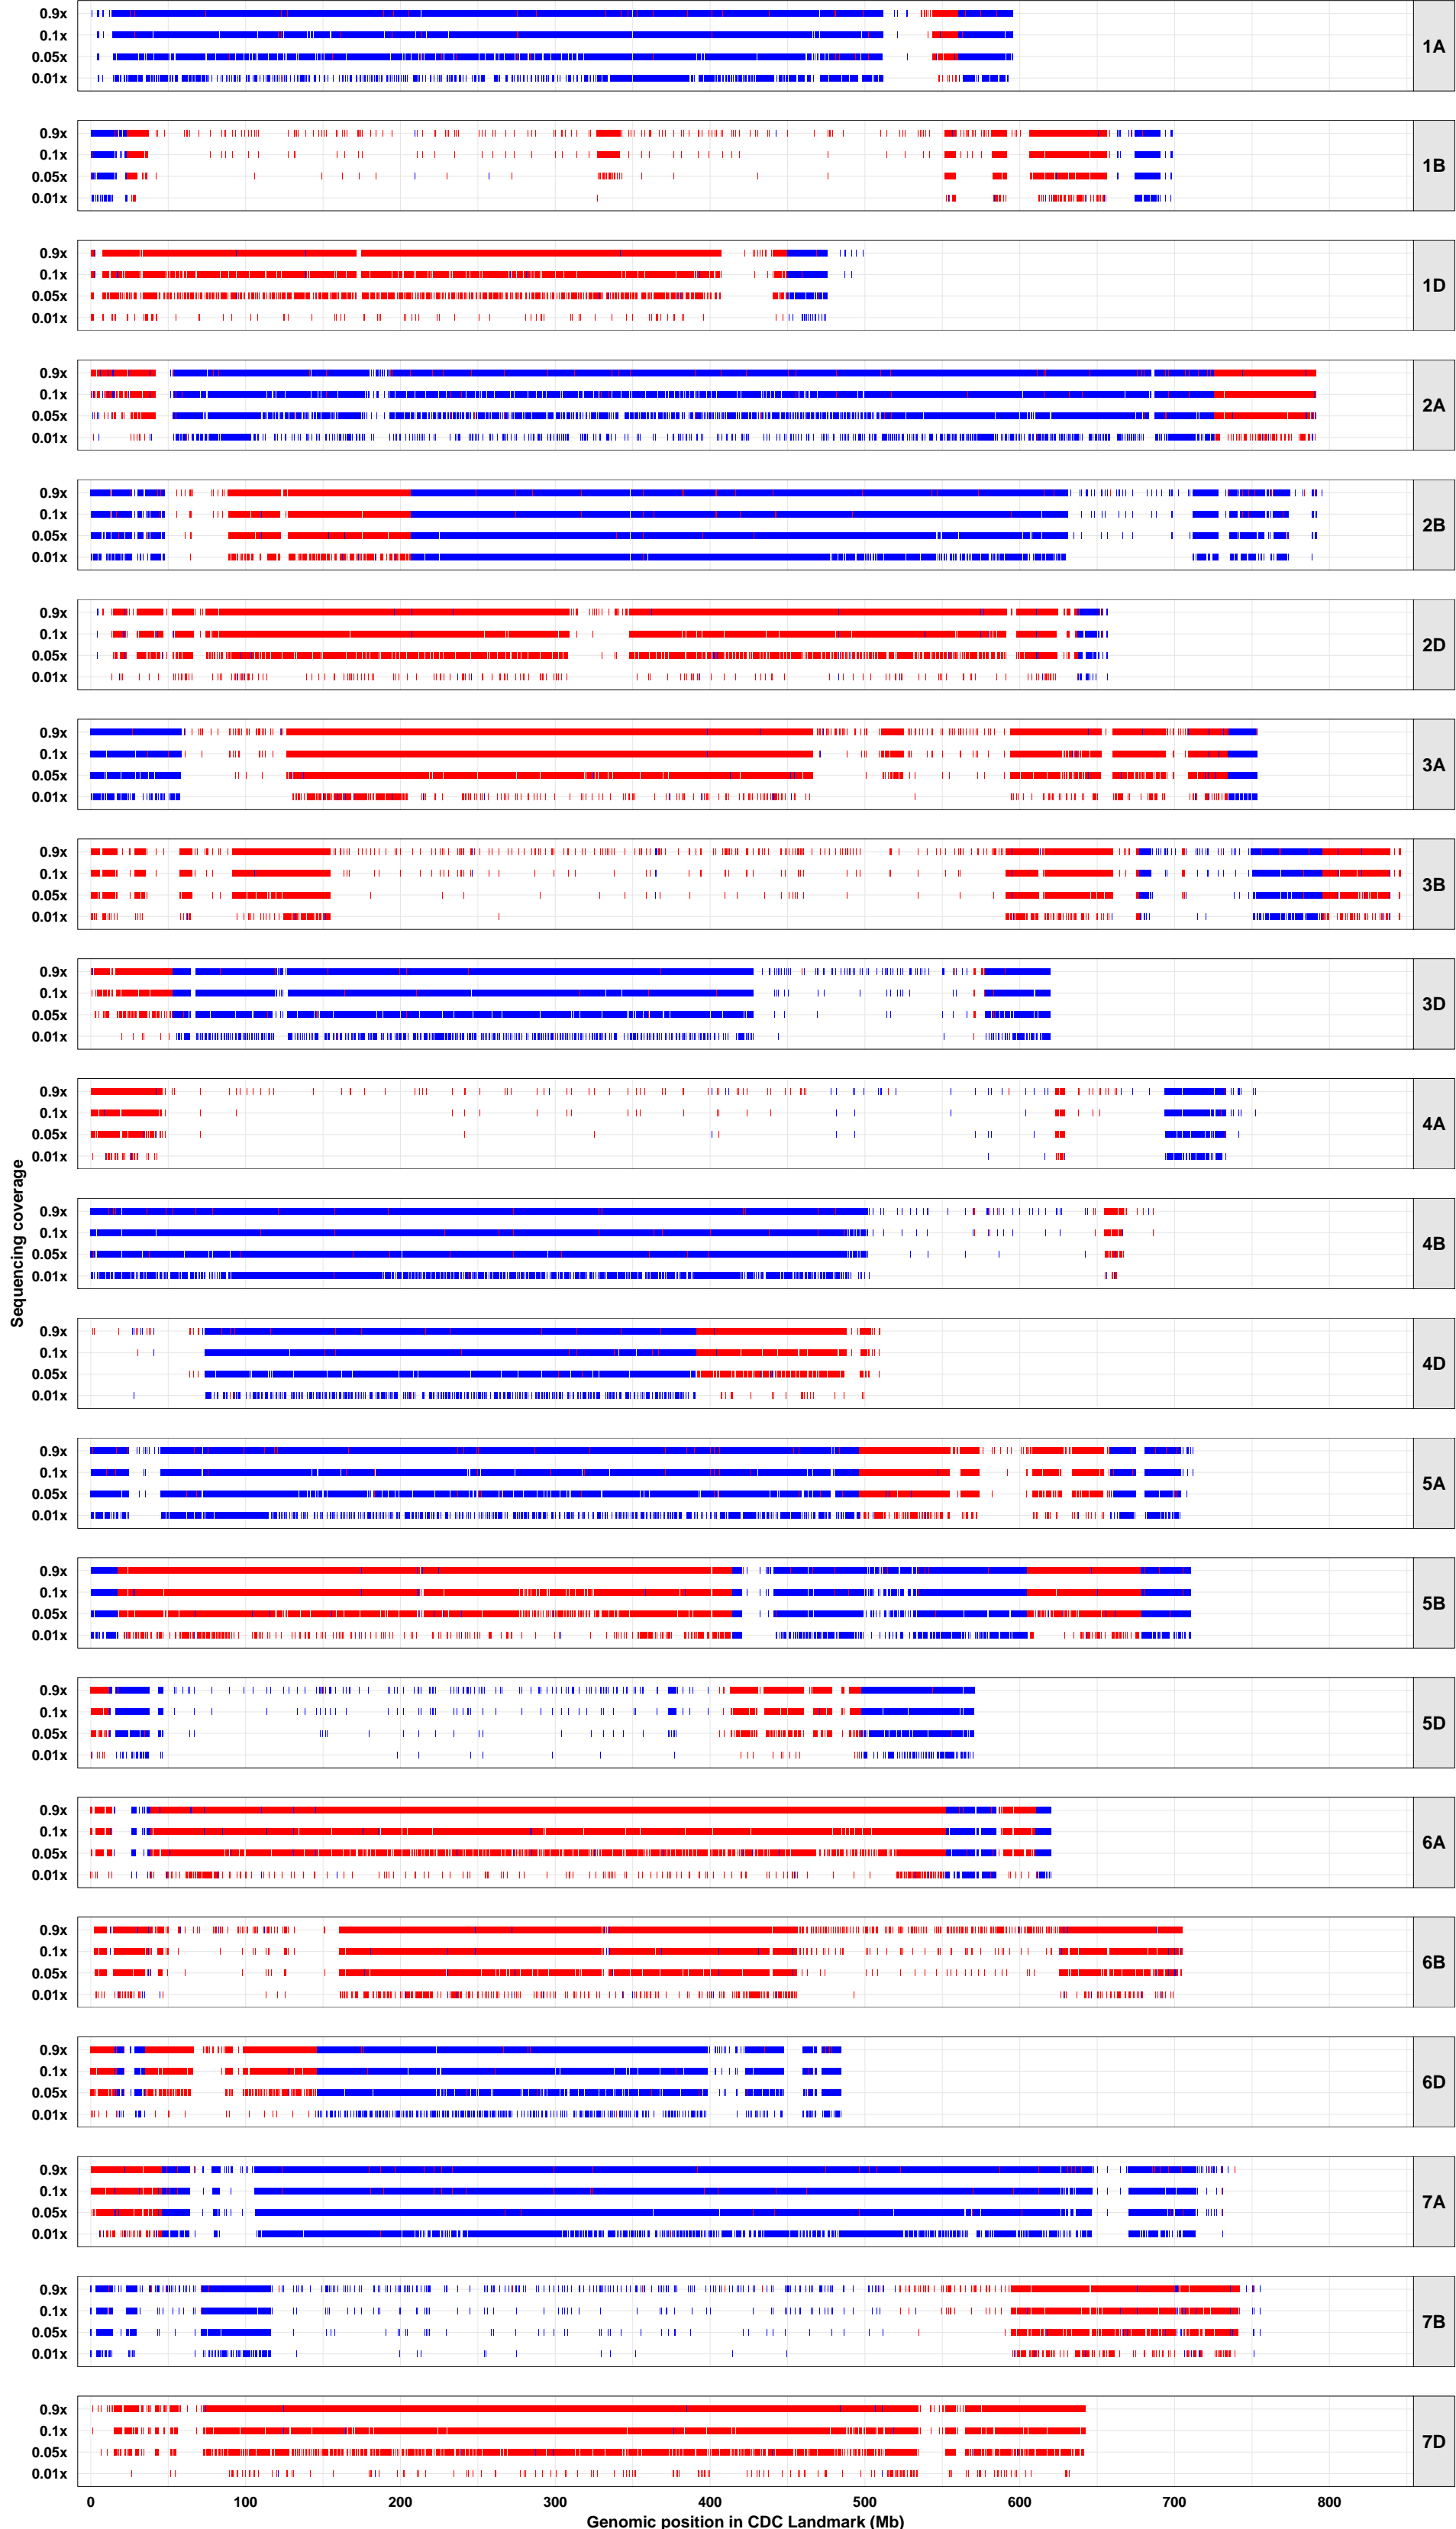

Supplement: Supplementary file 44 [file StanleyLandmarkDH02009-0.pdf › Supplementary-Figure-S3_StanleyLandmarkDH/StanleyLandmarkDH02009-0.pdf]

StanleyLandmarkDH02014-0

CDC Landmark CDC Stanley

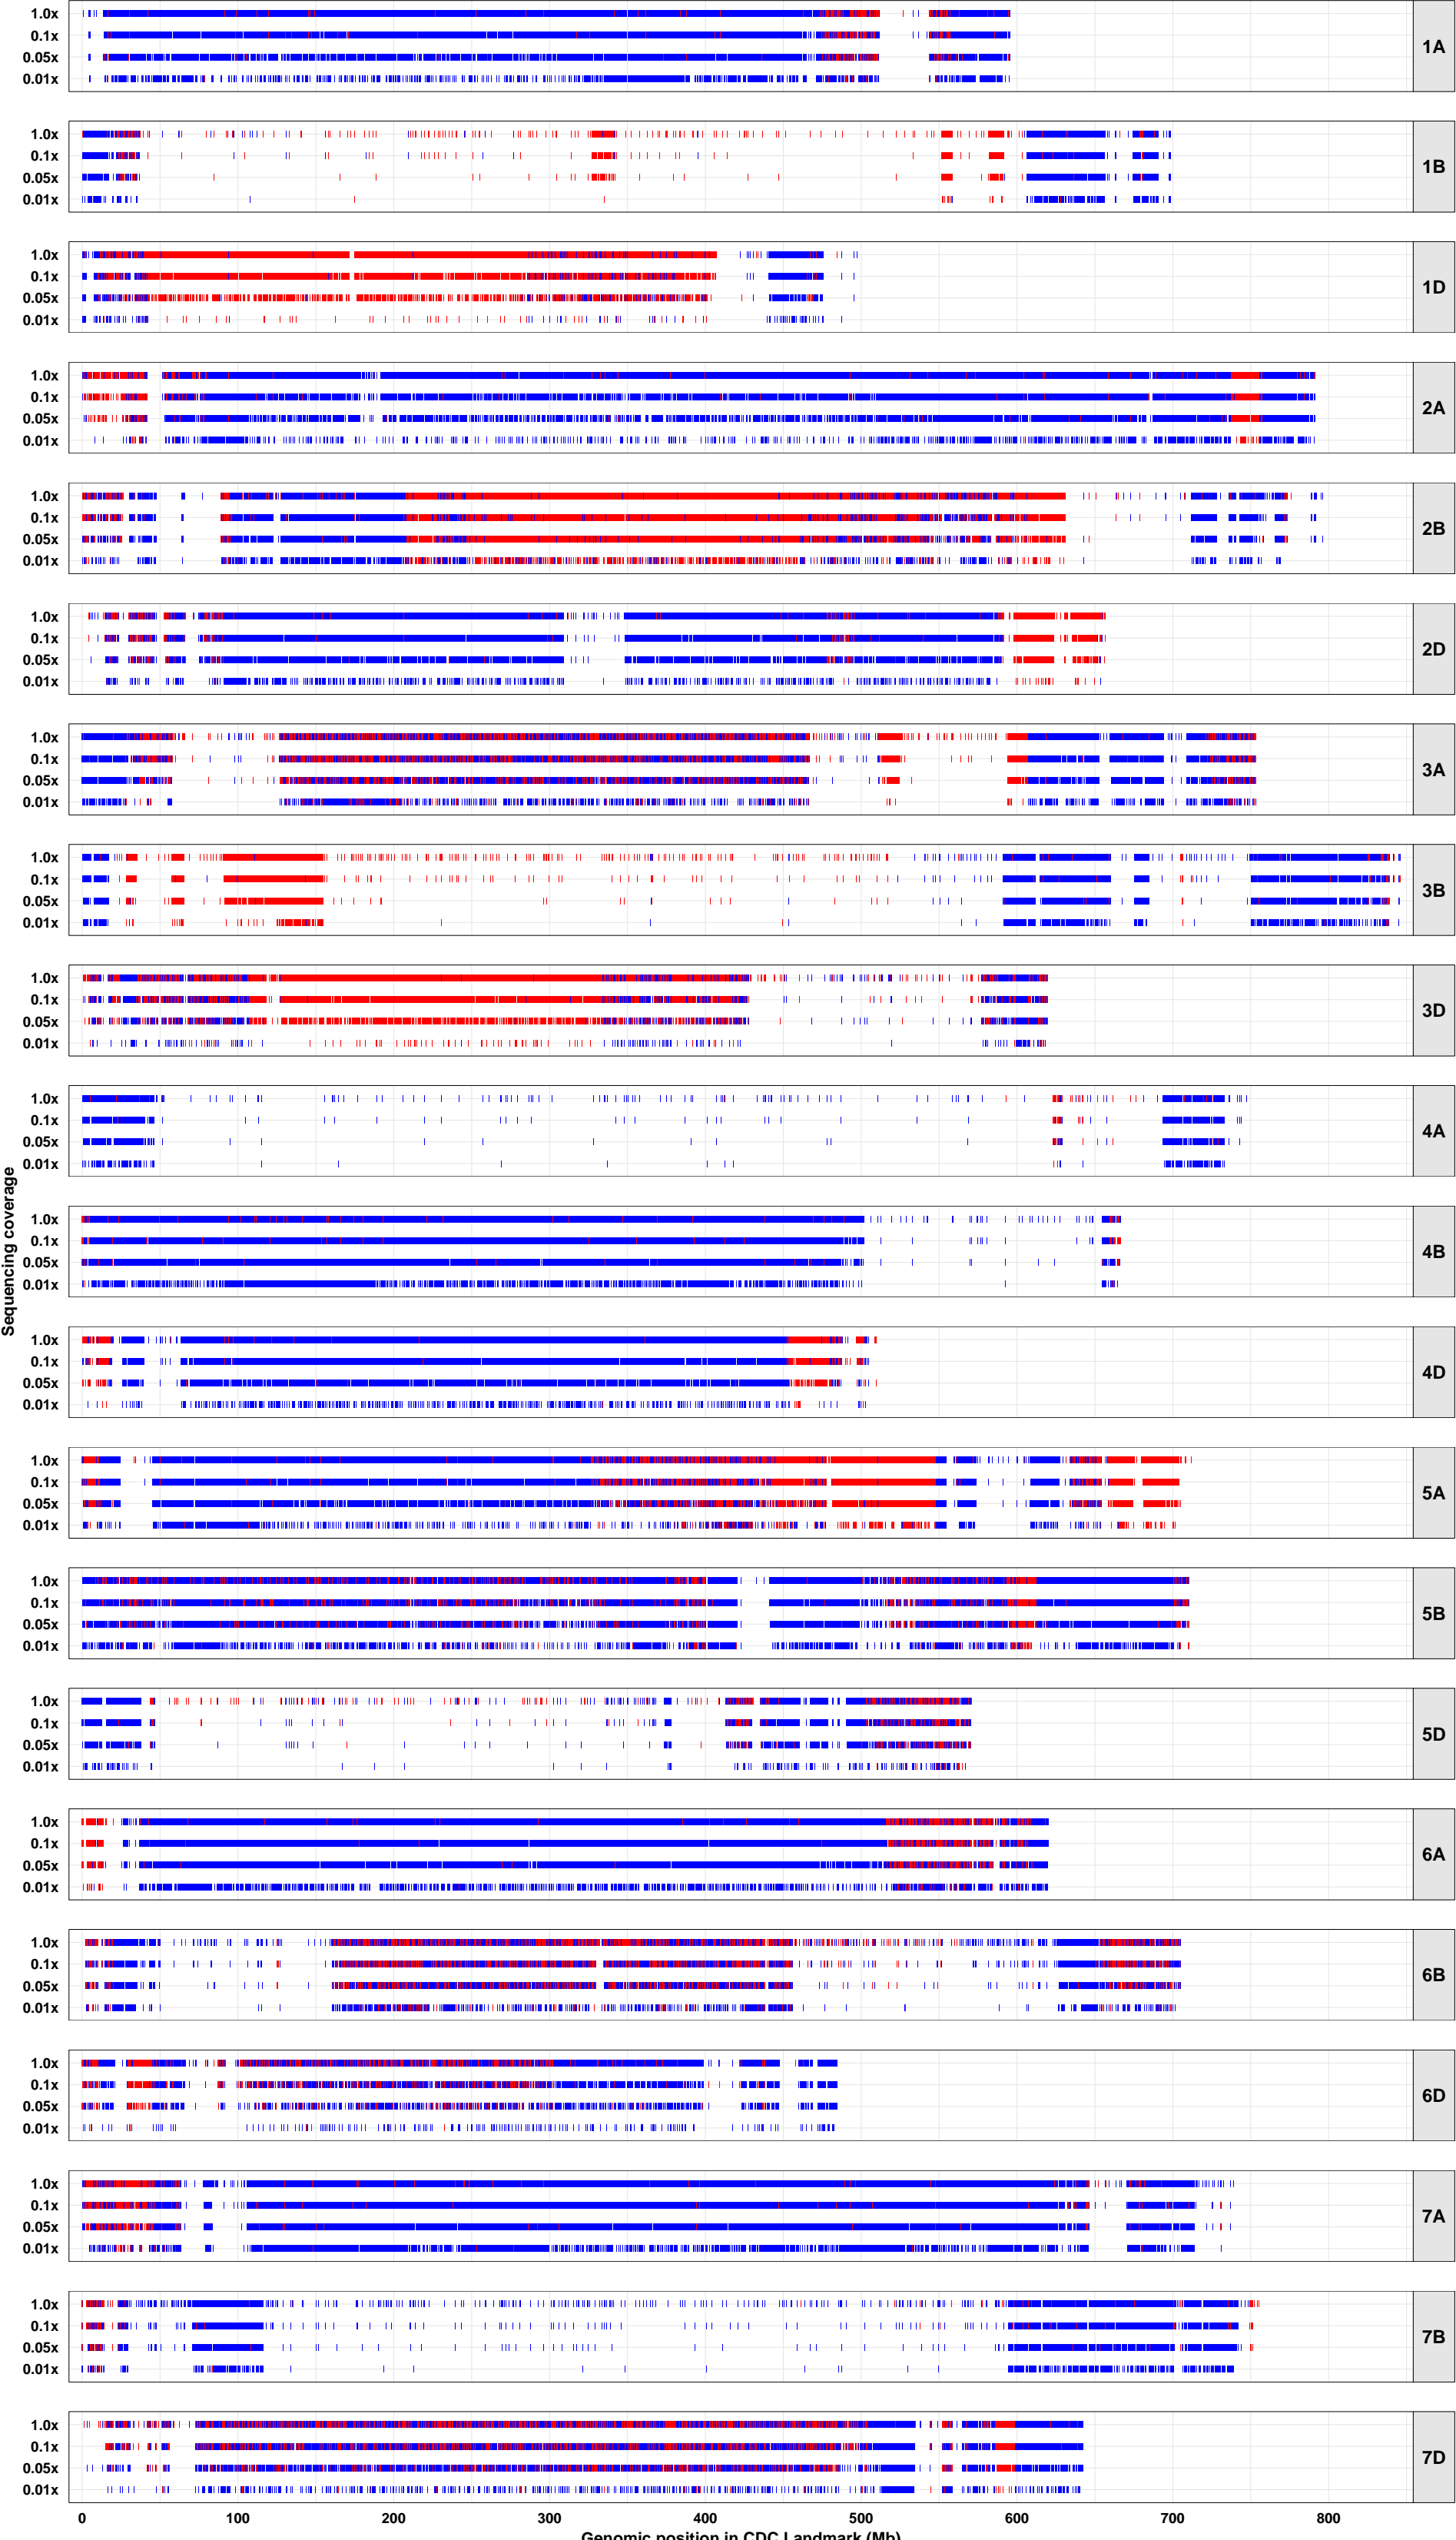

Supplement: Supplementary file 45 [file StanleyLandmarkDH02014-0.pdf › Supplementary-Figure-S3_StanleyLandmarkDH/StanleyLandmarkDH02014-0.pdf]

StanleyLandmarkDH02017-0

CDC Landmark CDC Stanley

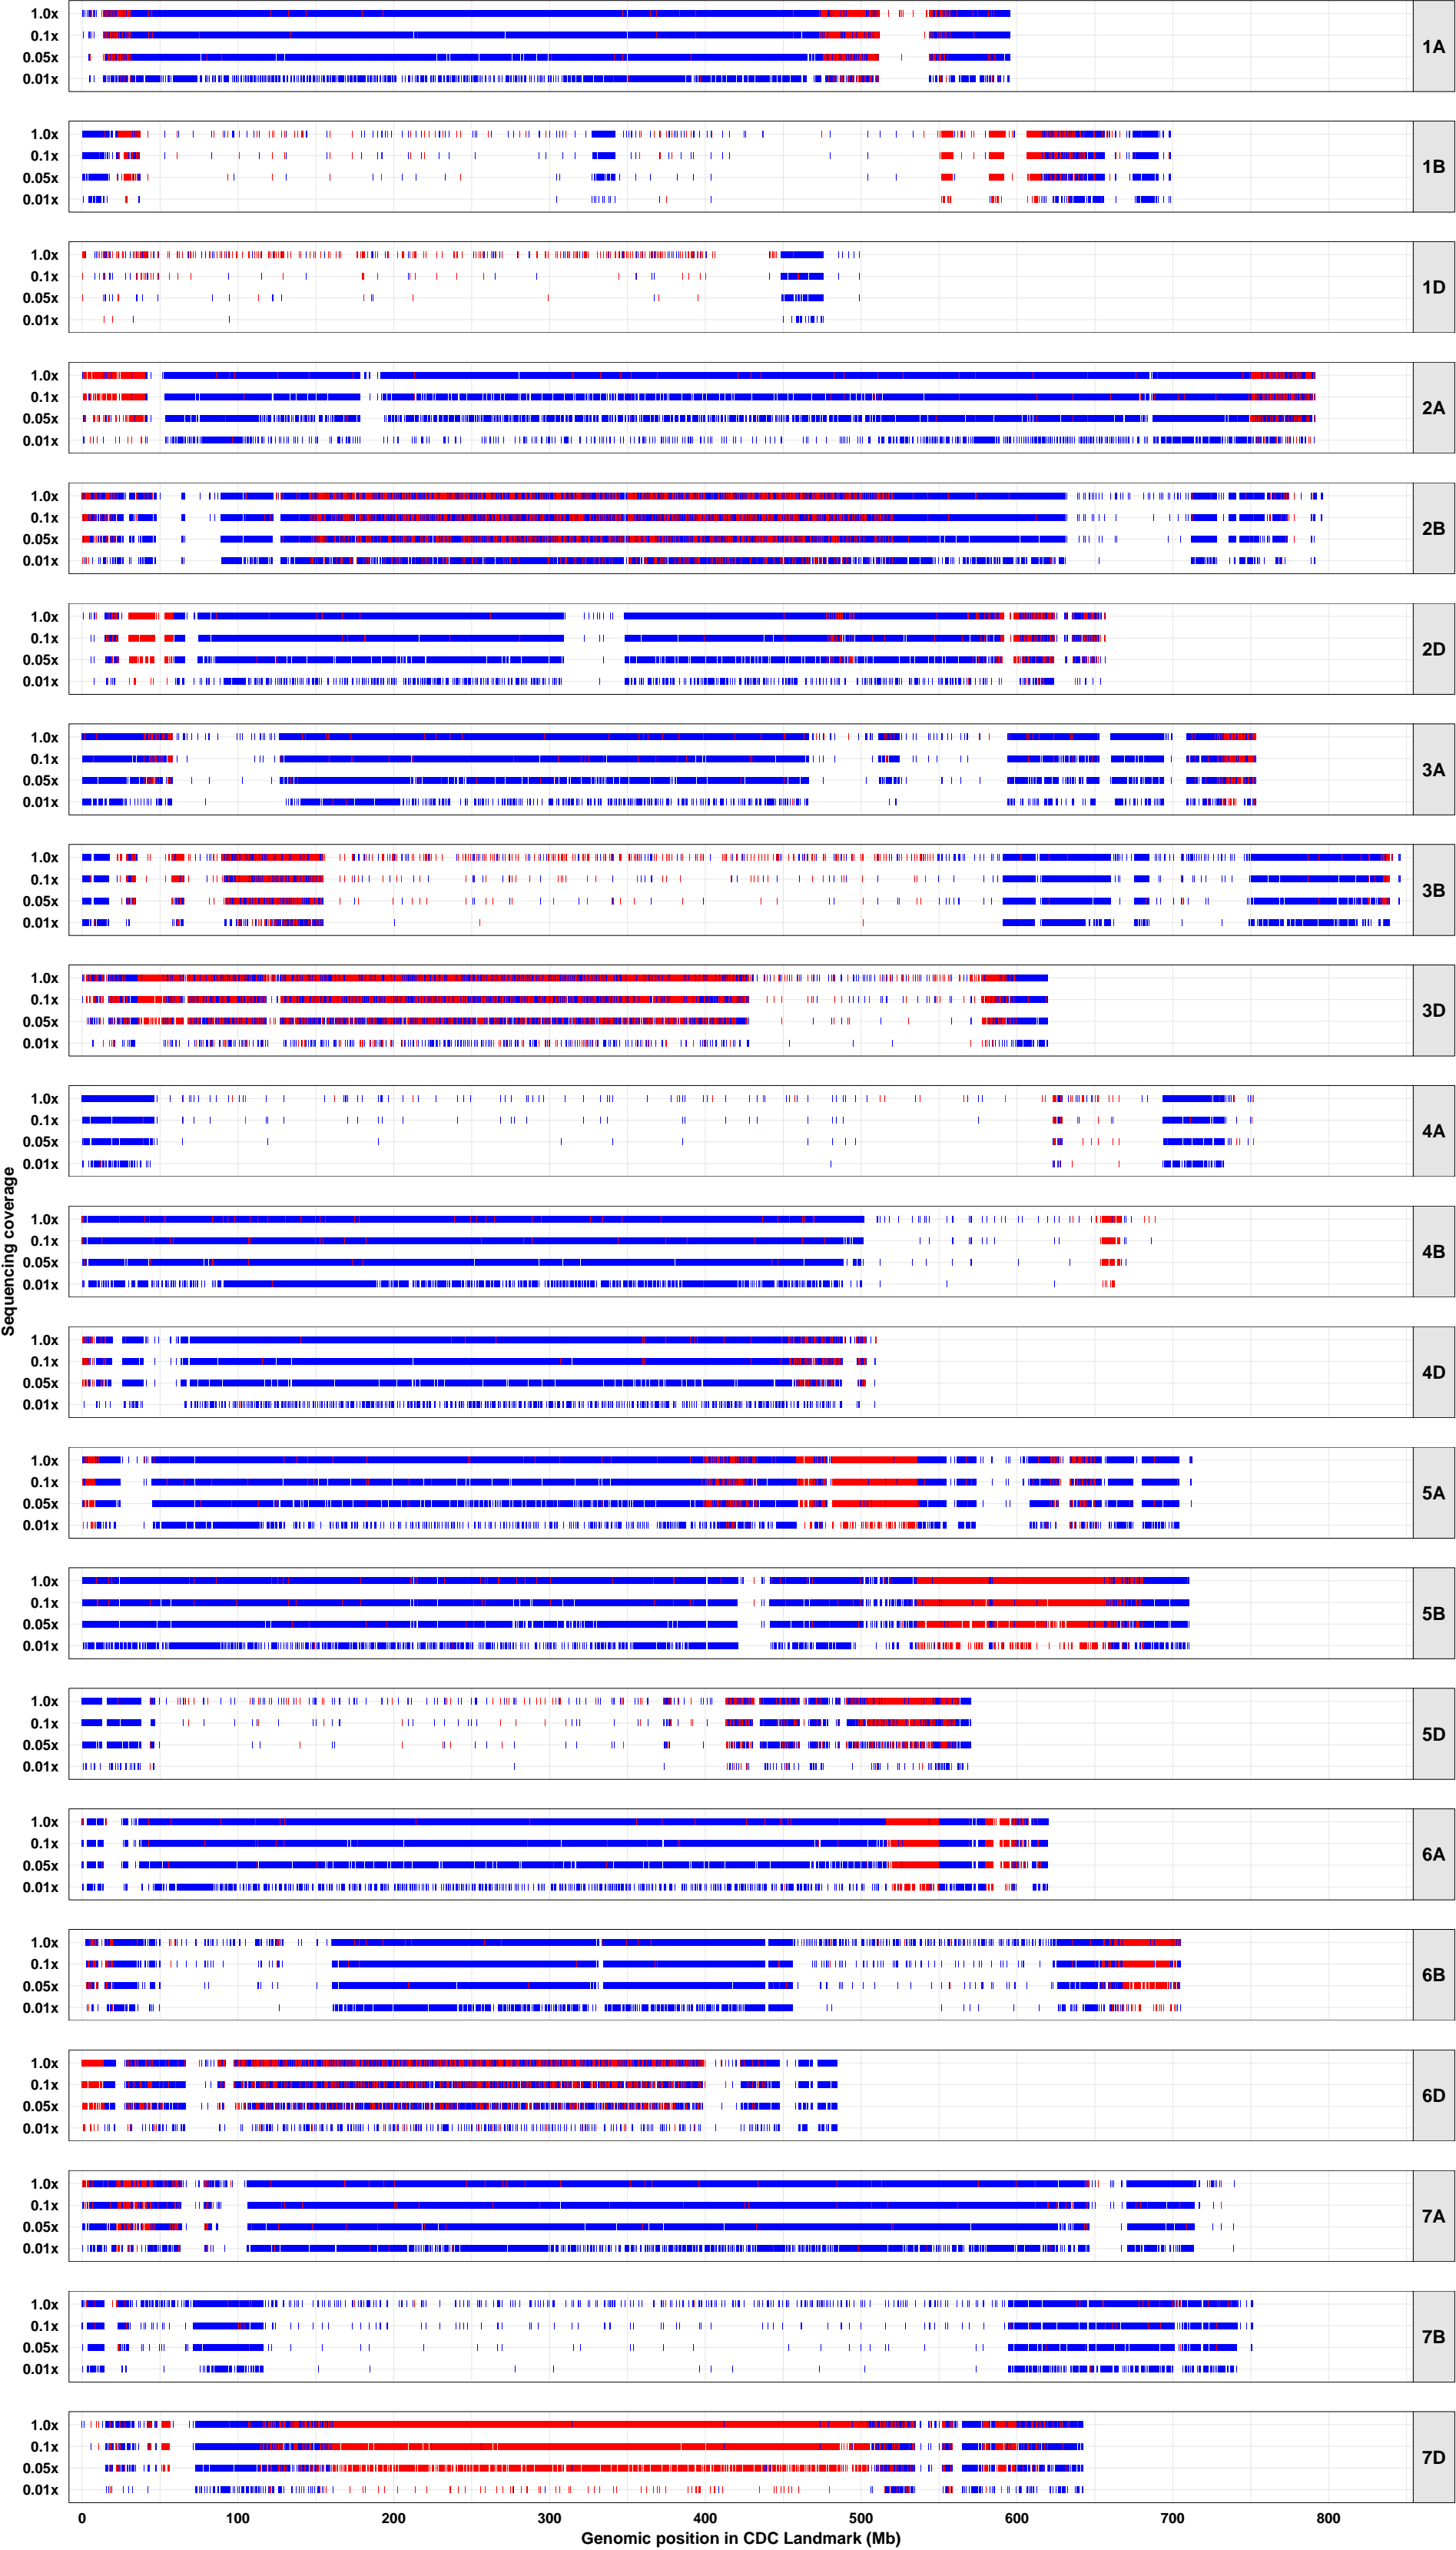

Supplement: Supplementary file 46 [file StanleyLandmarkDH02017-0.pdf › Supplementary-Figure-S3_StanleyLandmarkDH/StanleyLandmarkDH02017-0.pdf]

StanleyLandmarkDH02024-0

CDC Landmark CDC Stanley

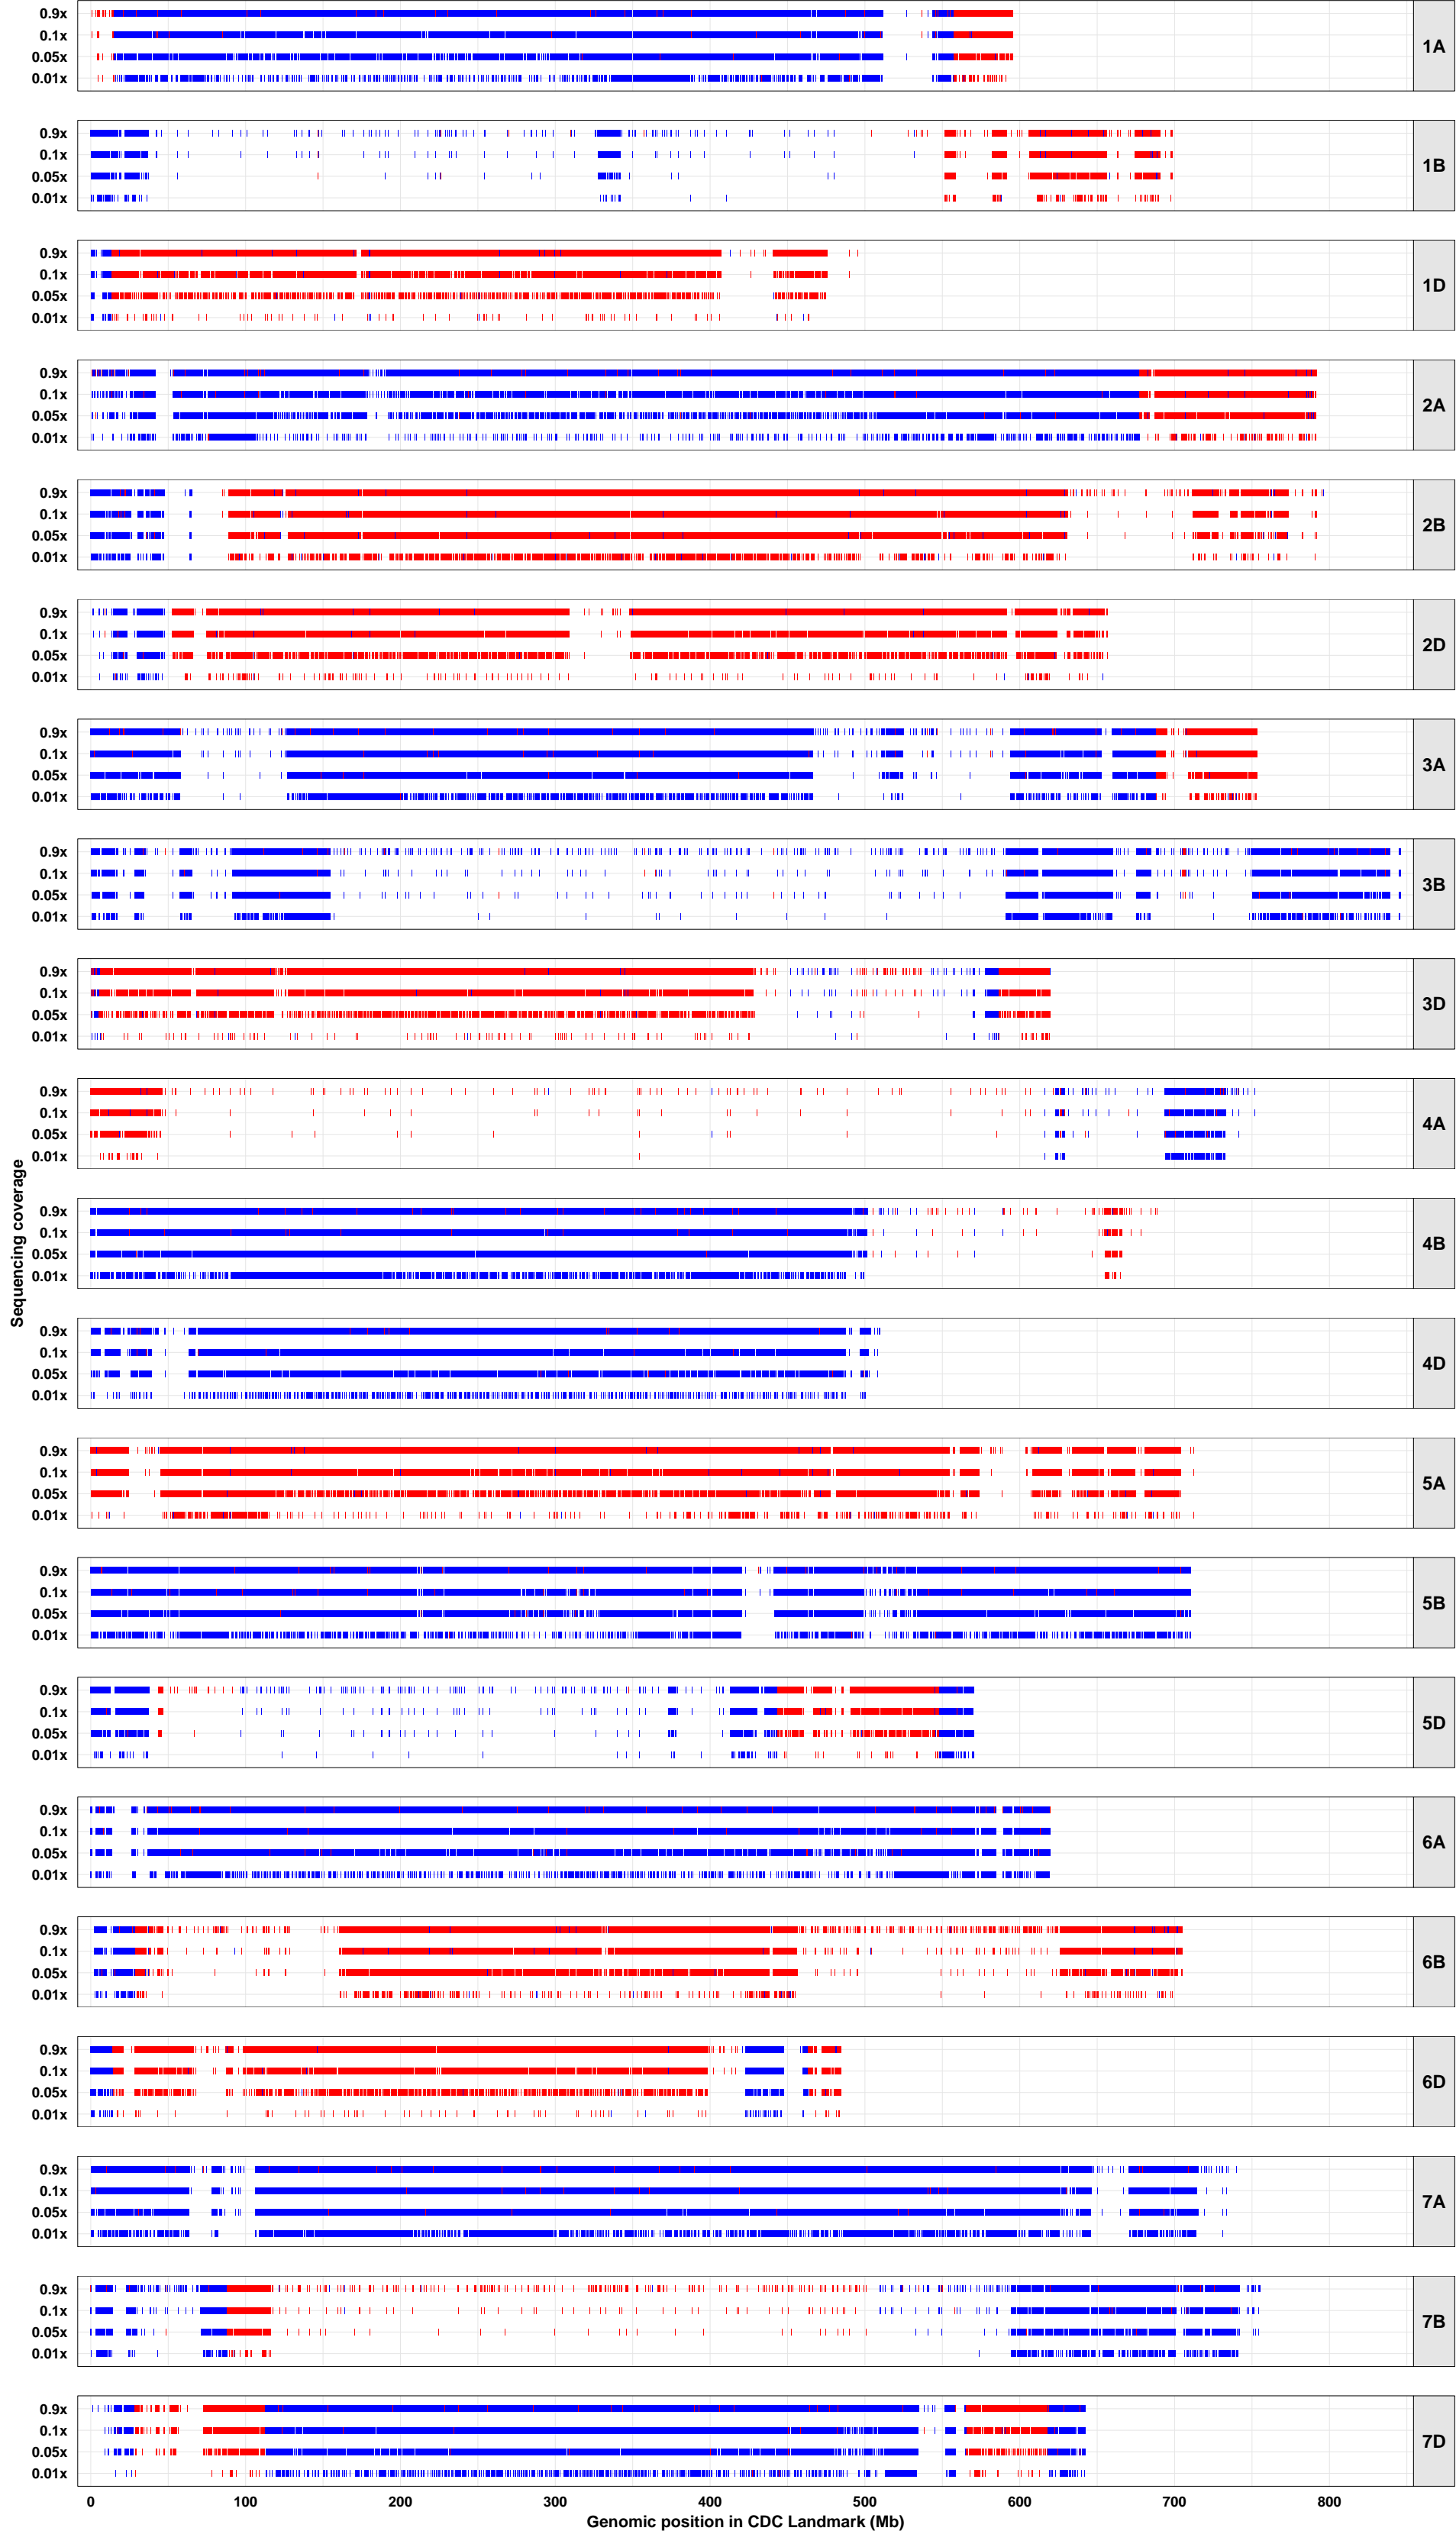

Supplement: Supplementary file 47 [file StanleyLandmarkDH02024-0.pdf › Supplementary-Figure-S3_StanleyLandmarkDH/StanleyLandmarkDH02024-0.pdf]

StanleyLandmarkKDHO2045-0

CDC Landmark CDC Stanley

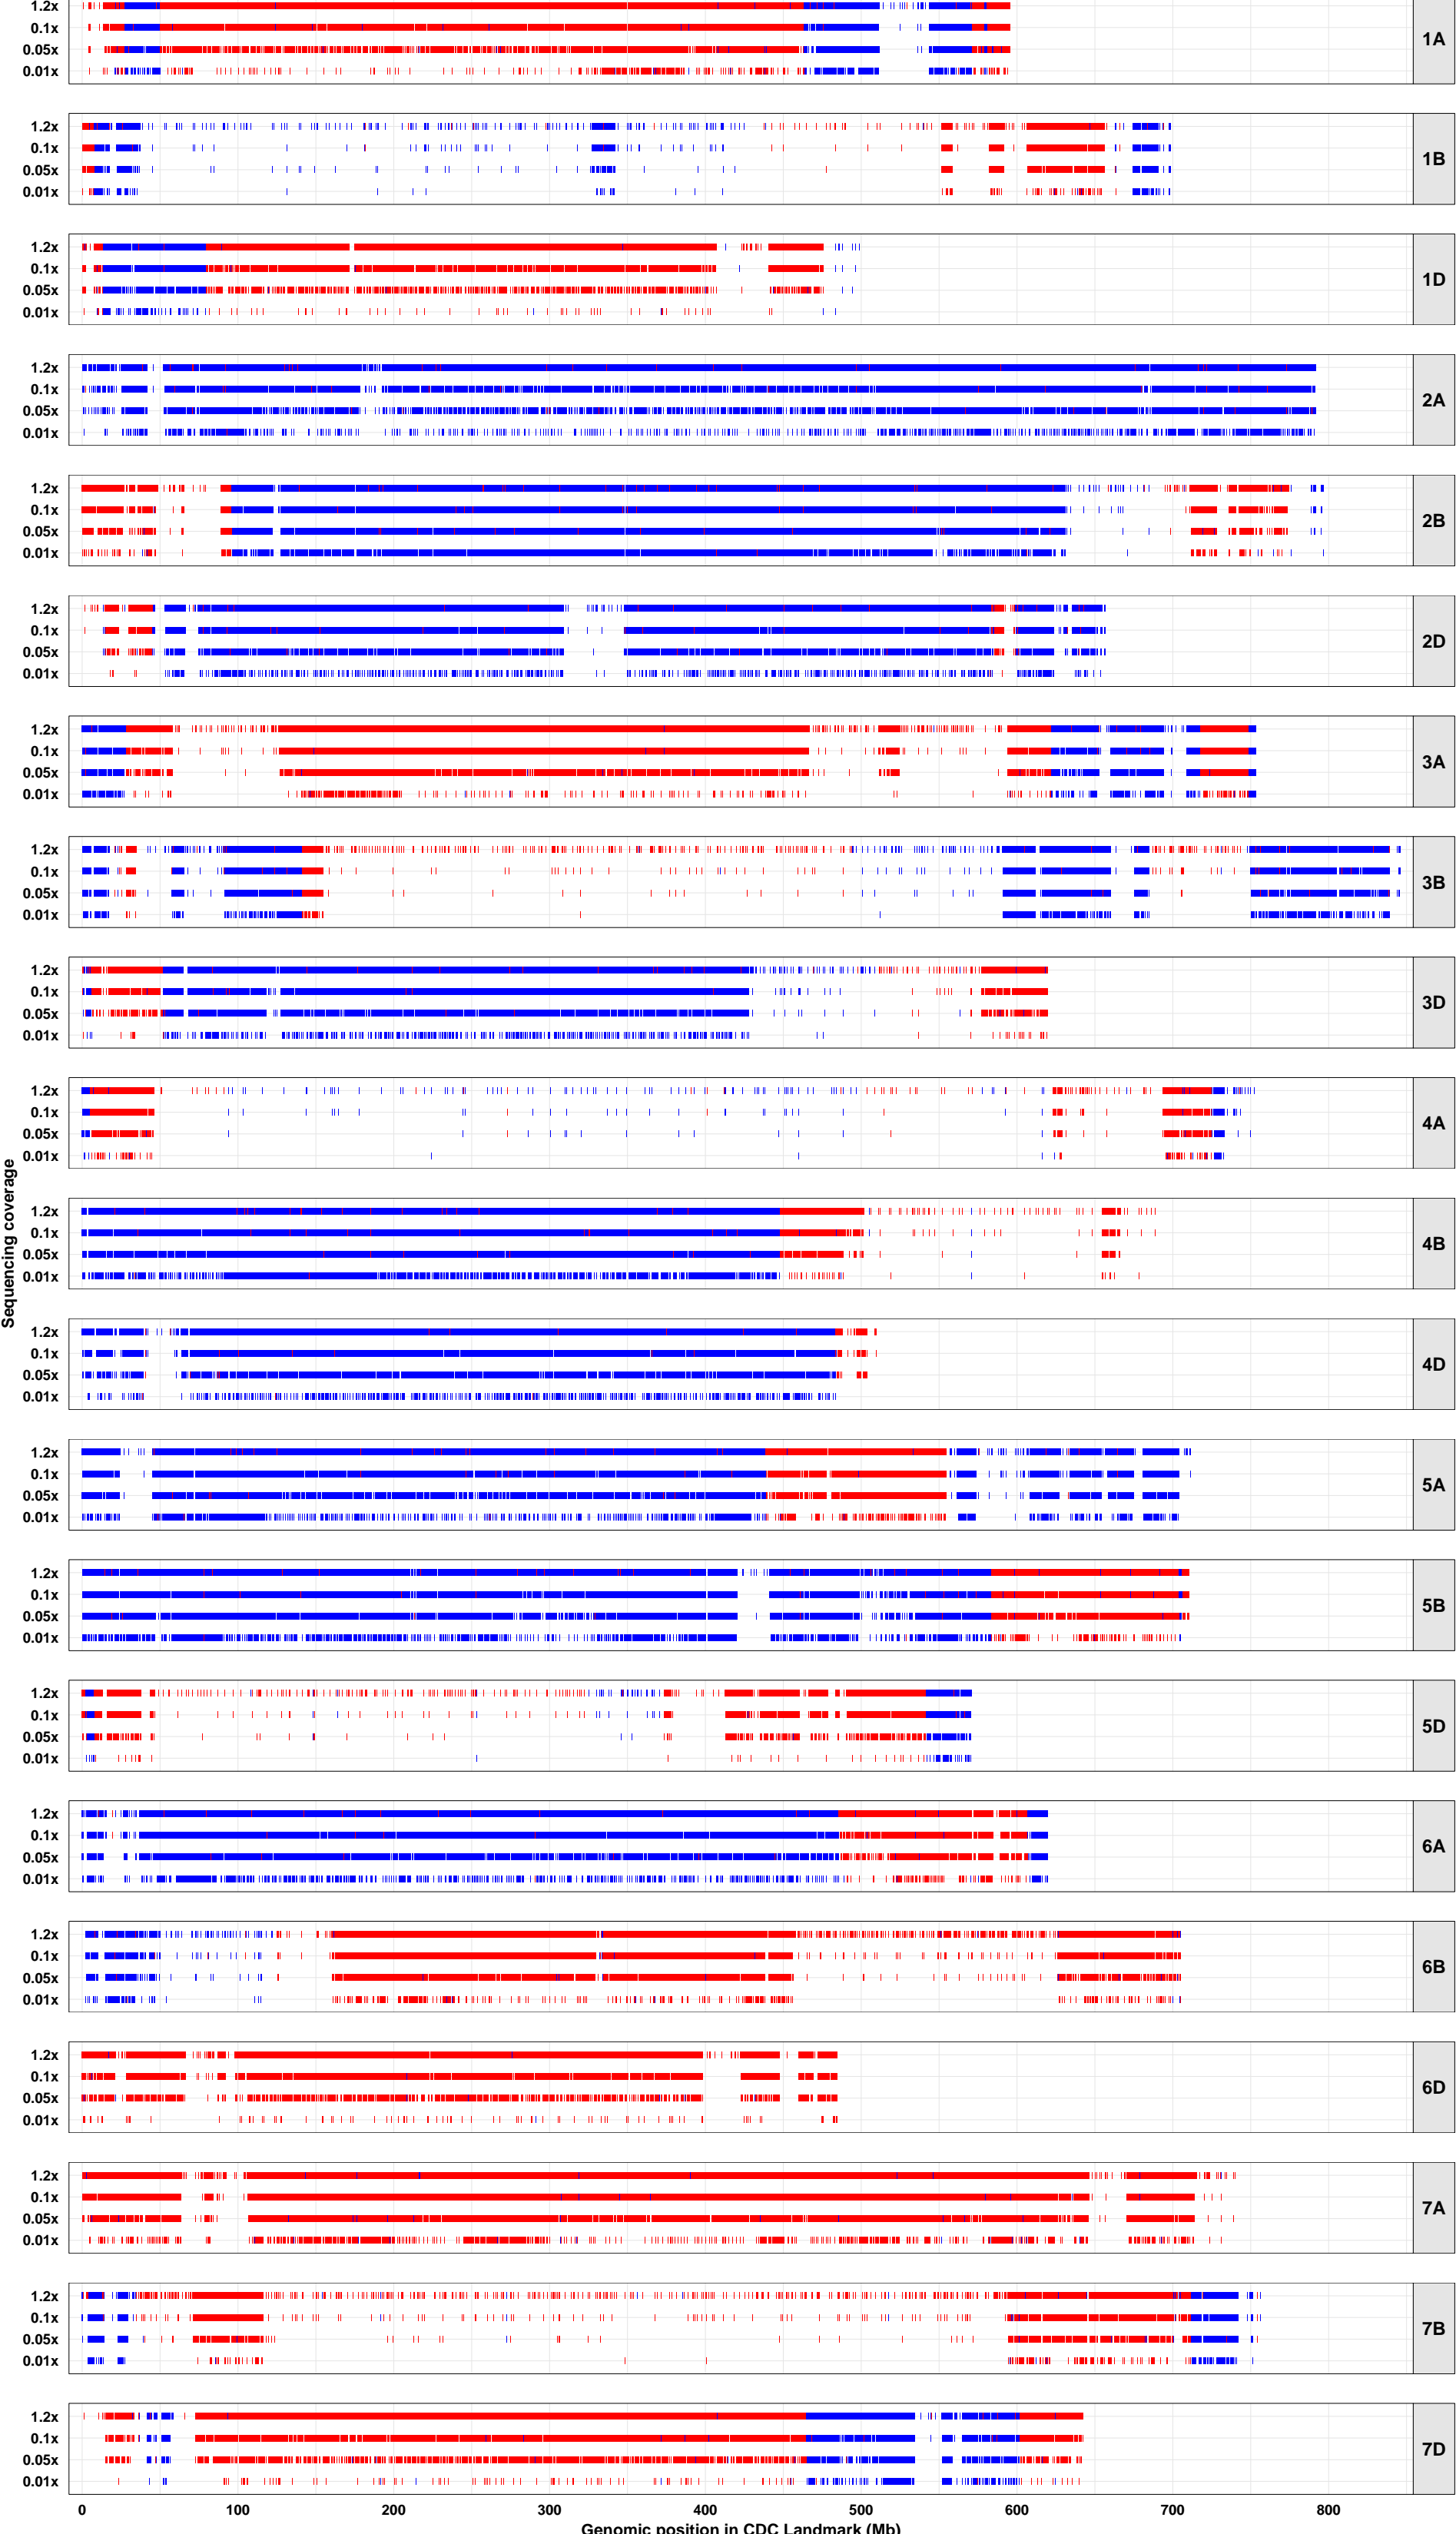

Supplement: Supplementary file 48 [file StanleyLandmarkDH02045-0.pdf › Supplementary-Figure-S3_StanleyLandmarkDH/StanleyLandmarkDH02045-0.pdf]

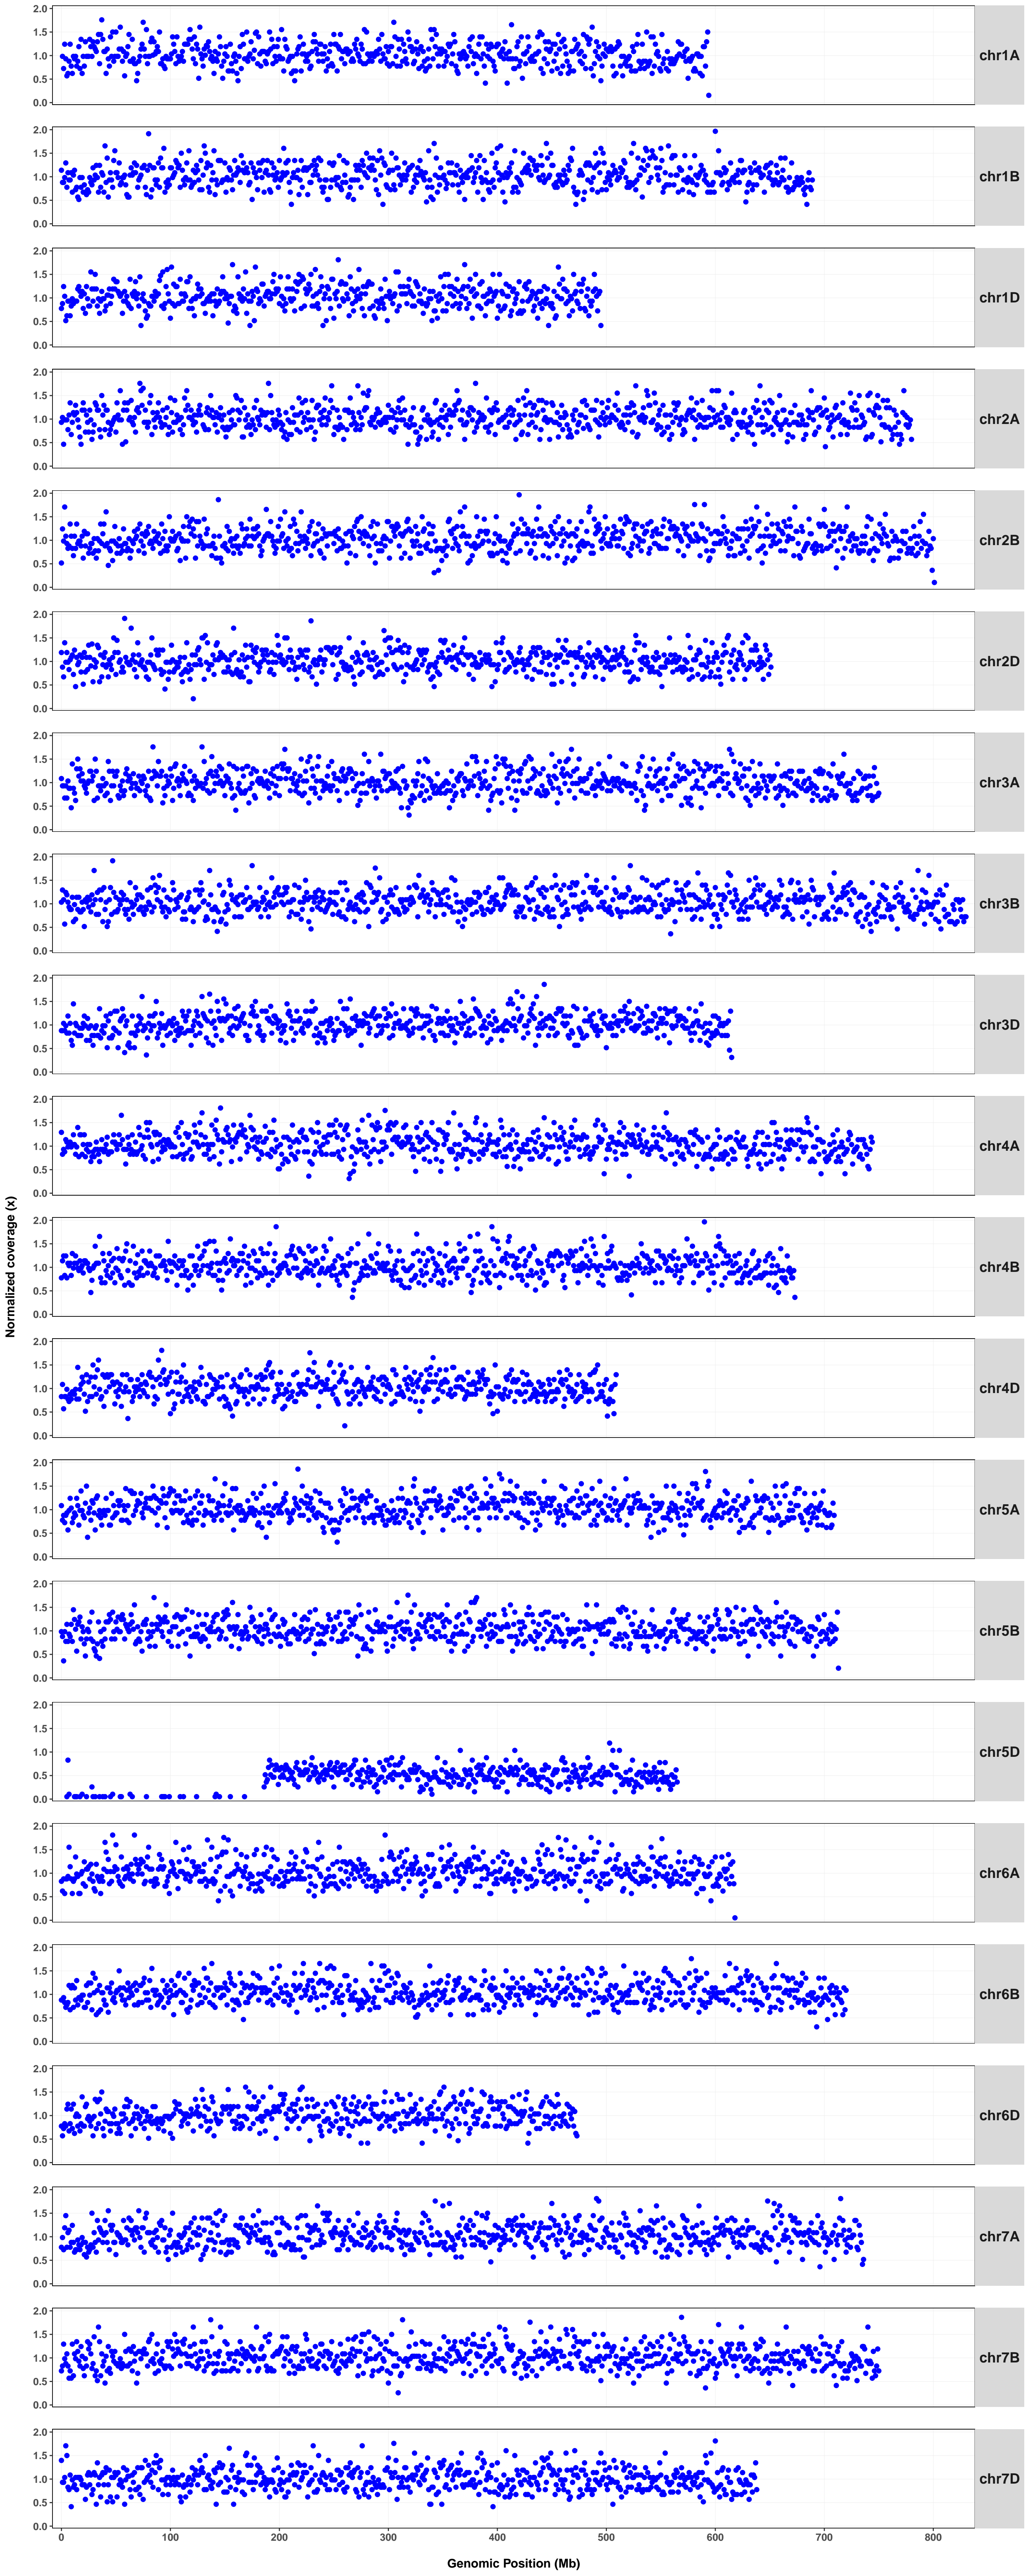

Supplement: Supplementary file 49 [file fef3aaa318c18d325cad6b11.pdf]
